# Supplementary material for: LncRNA–miRNA–mRNA Networks of Gastrointestinal Cancers Representing Common and Specific LncRNAs and mRNAs
Source: PubMed Central journal article supplement (PMC8819090; doi:10.3389/fgene.2021.791919), 2022-01-24

**Supplementary Figure 2.** OS analysis of genes in patients with TCGA cancers. A: HNSC, B: LIHC, C: READ, D: STAD, E: COAD.

**(A) HNSC**

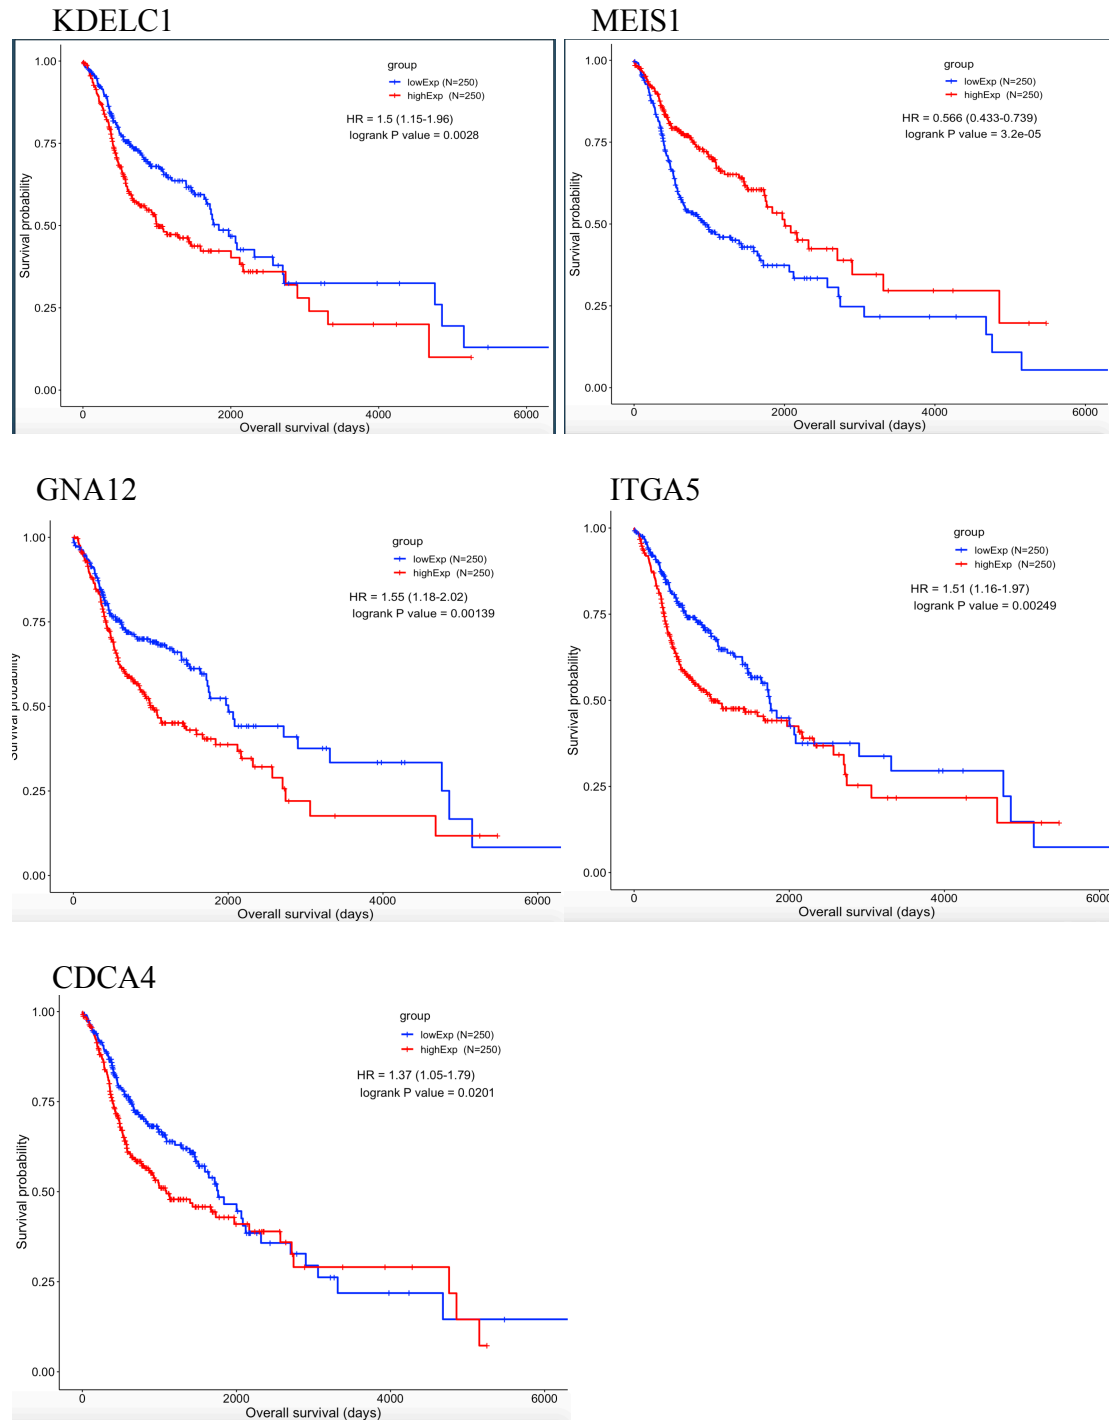

**(B) LIHC**
**RUNX3**
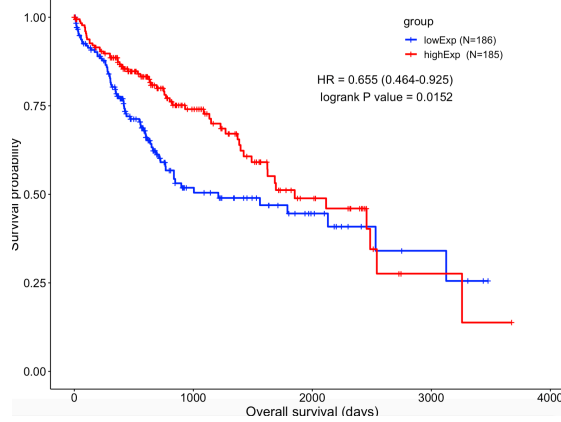
**CDC7**
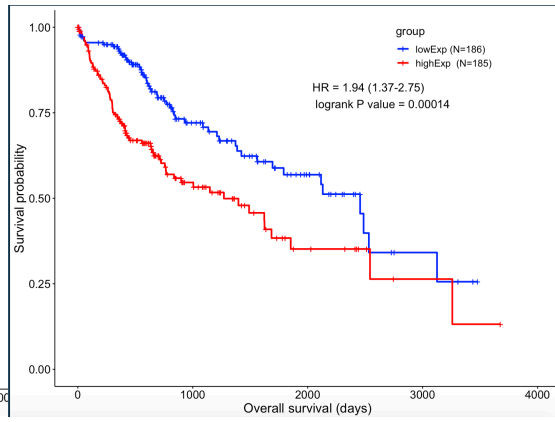
**SCML2**
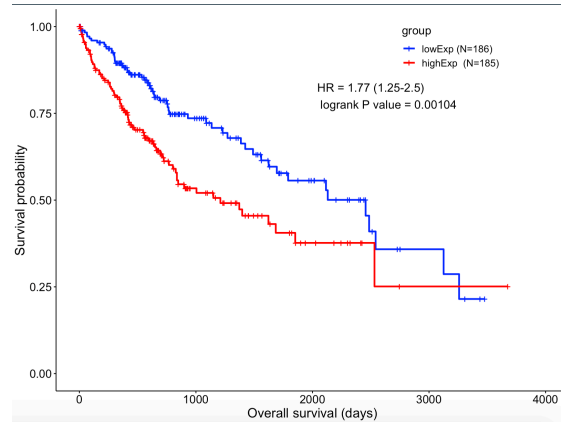
**LIMK1**
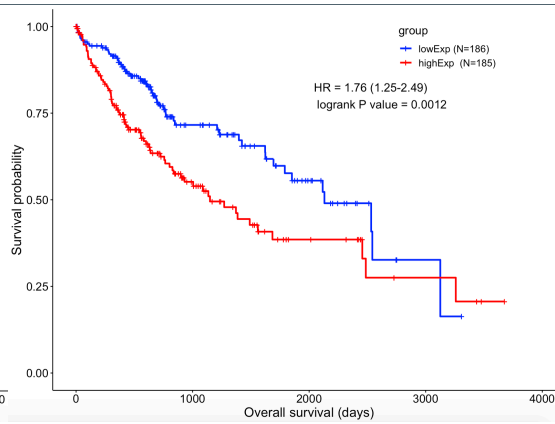
**CD69**
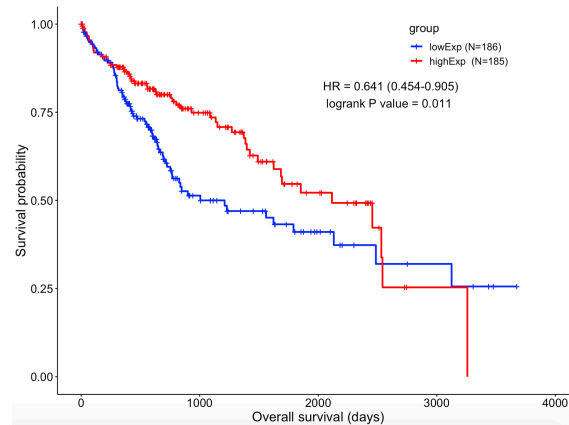
**RIPOR2**
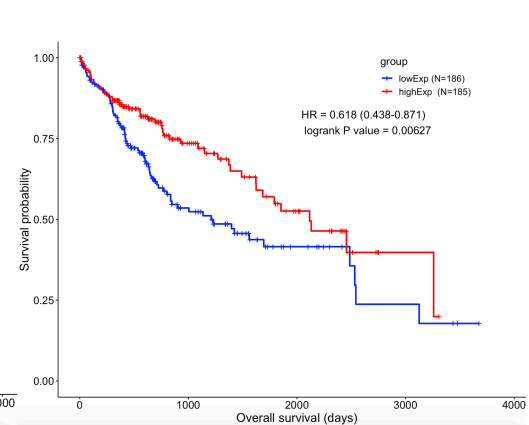

### FANCE

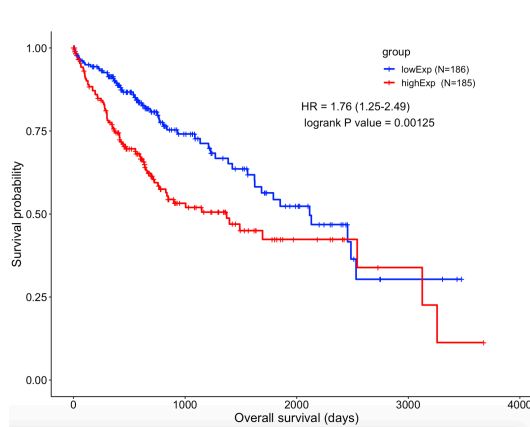

### PLXNA1

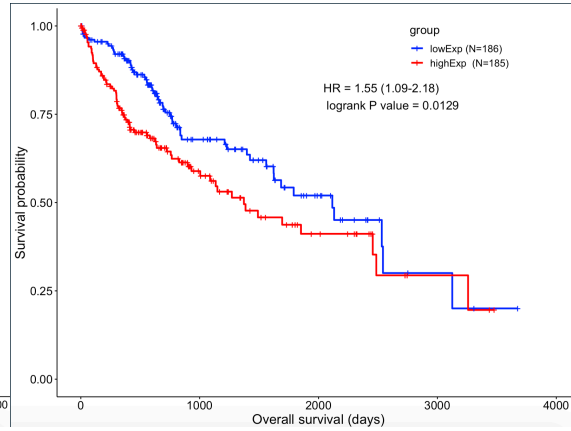

### GADD45A

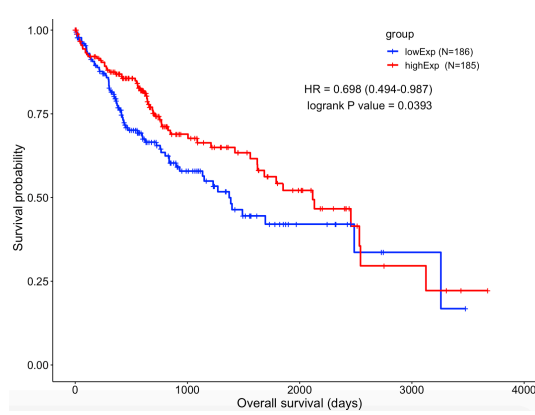

### E2F8

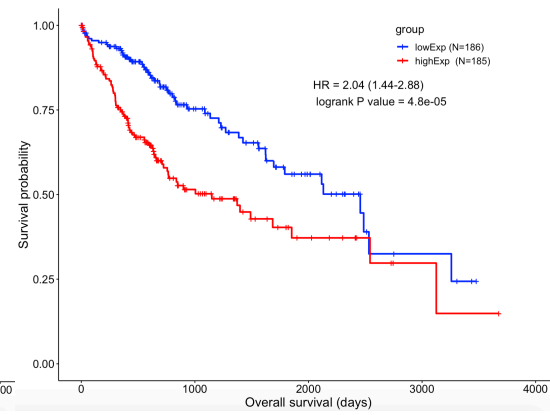

### EFNA3

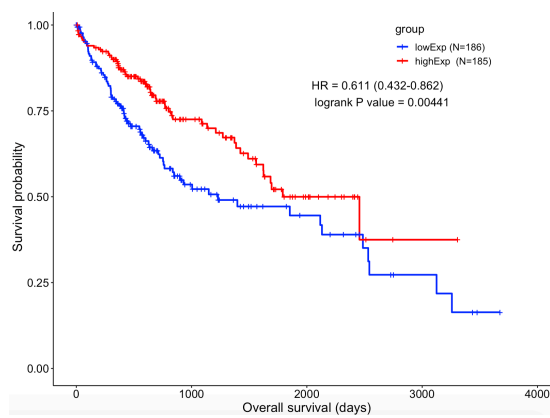

### SYBU

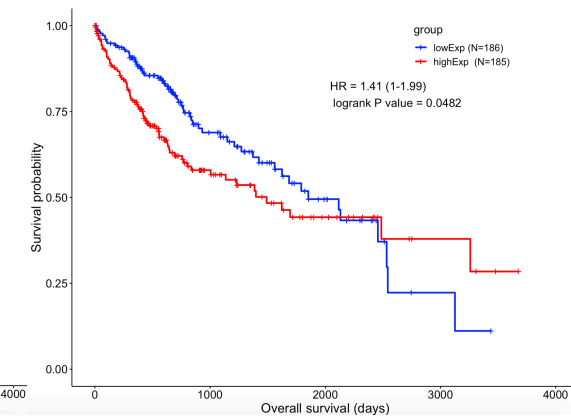

### SLC7A11

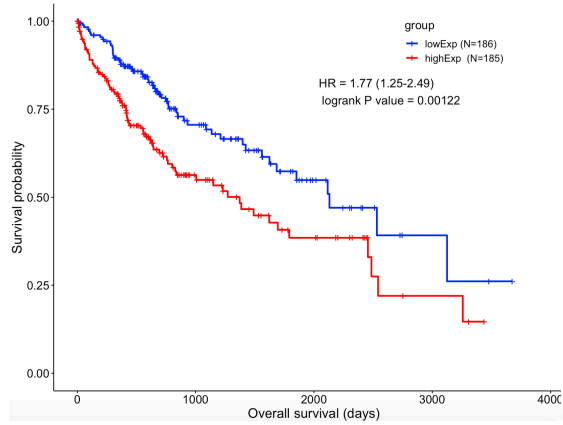

### ENAH

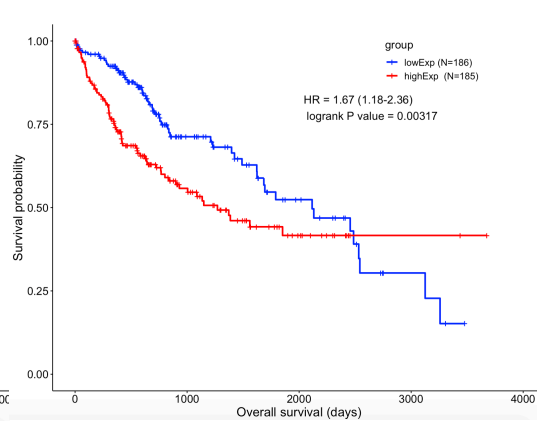

### ADAMTSL3

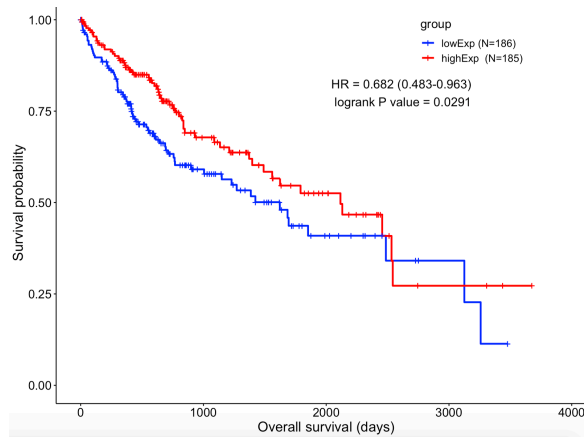

### TMEM164

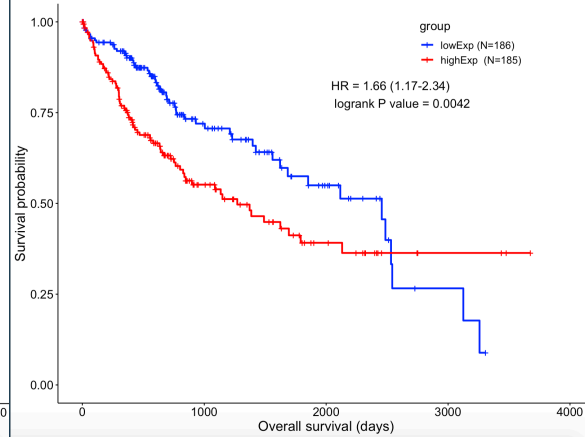

### AUTS2

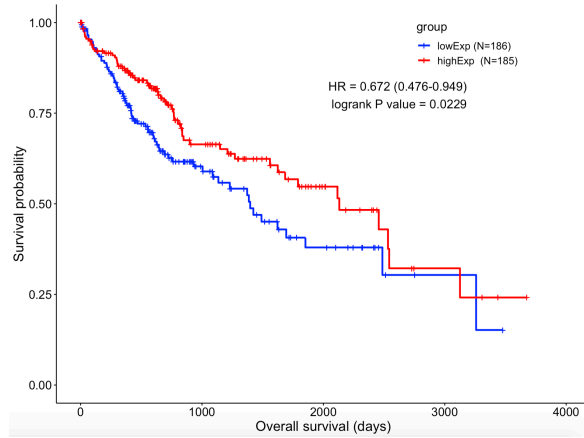

### H2AFZ

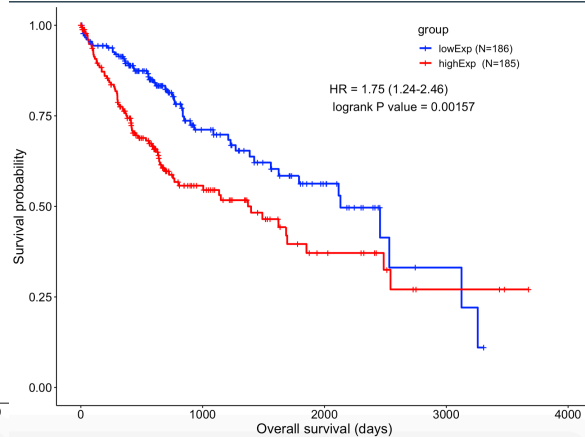

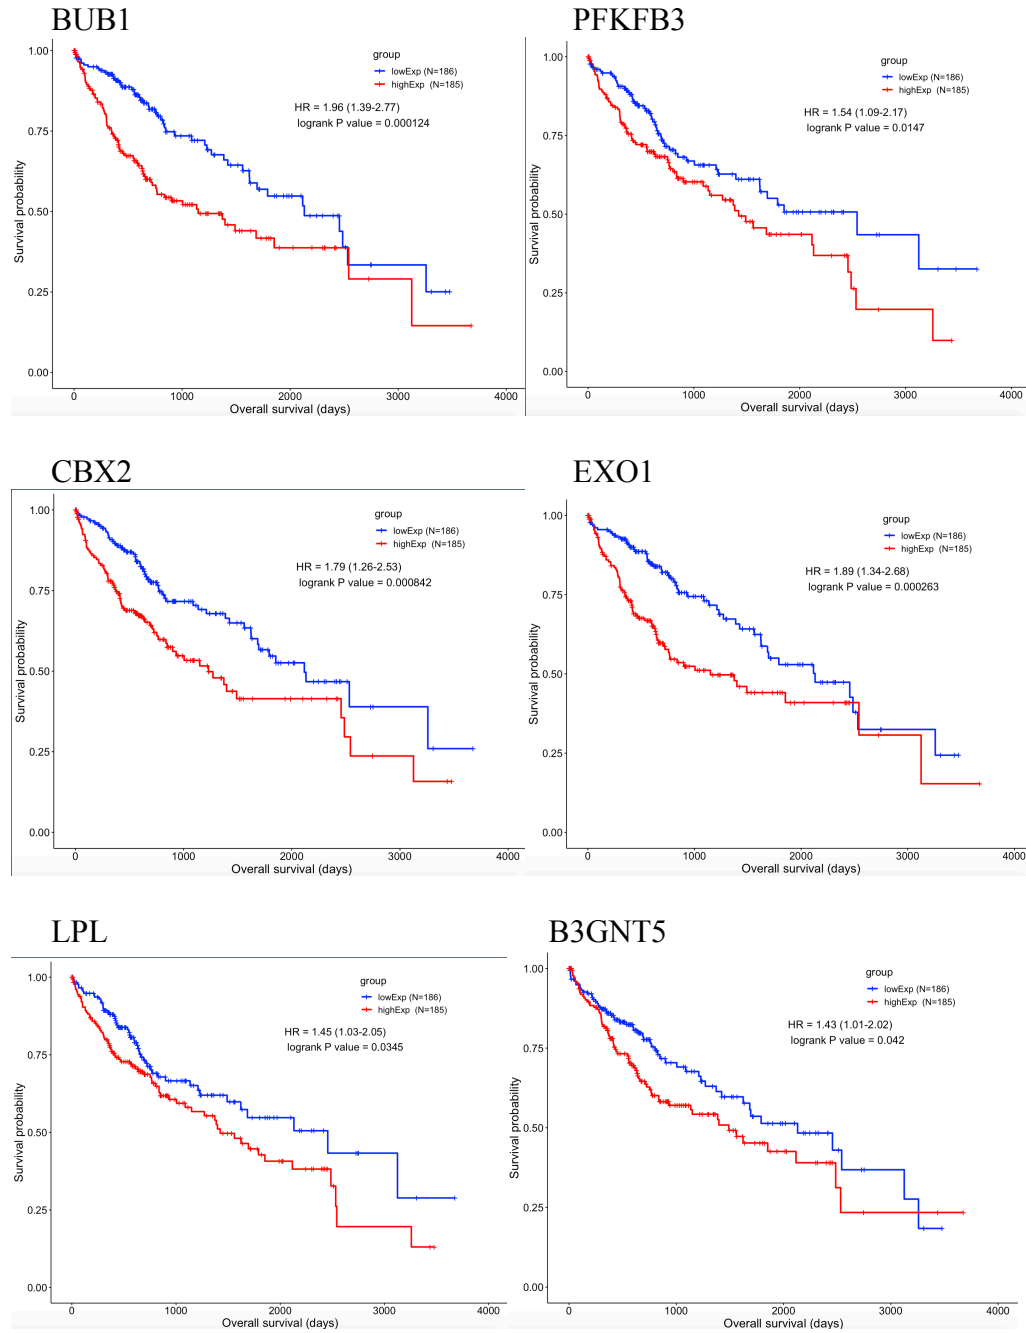

### LMNB2

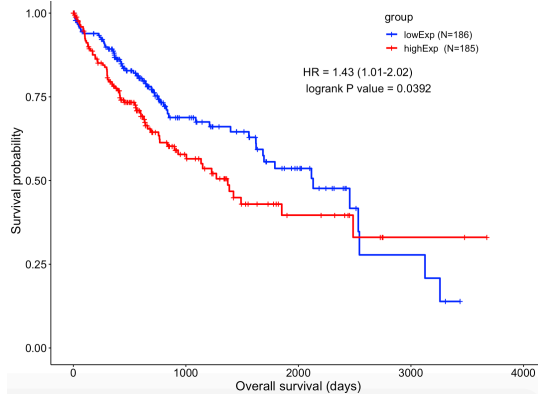

### SOX12

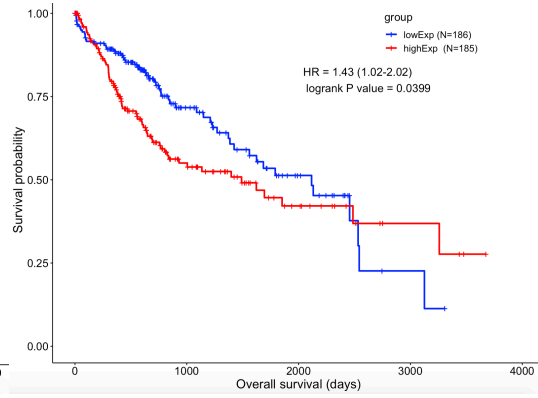

### JPT1

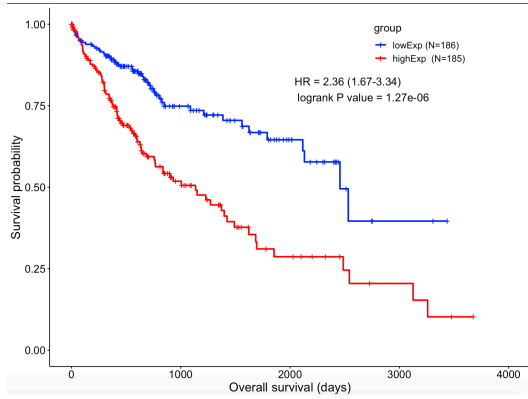

### MAFG

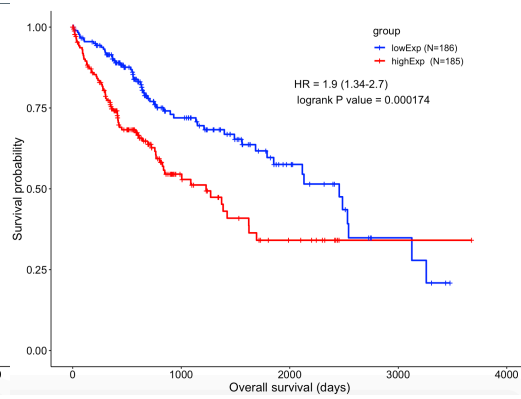

### DNM3

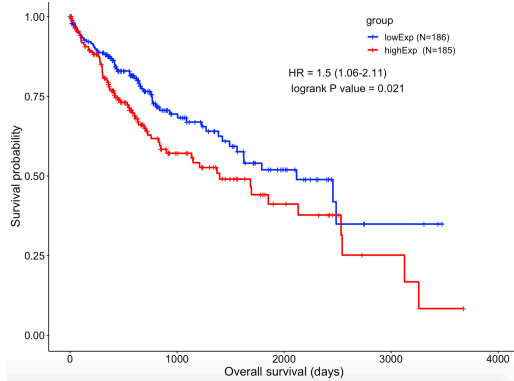

### ZNF607

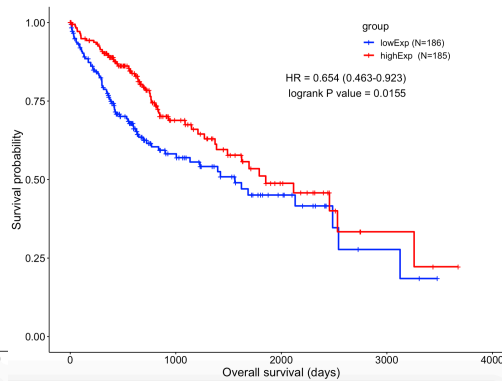

### STK39

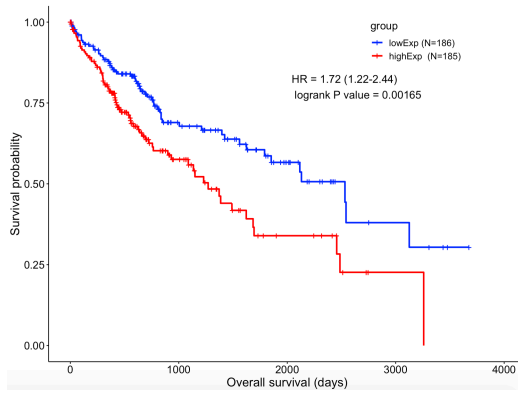

### ANKRD13B

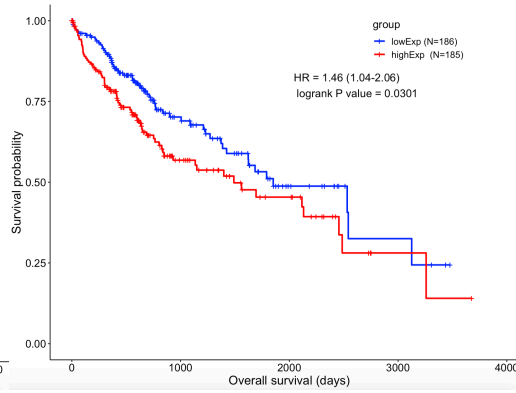

### SMOC1

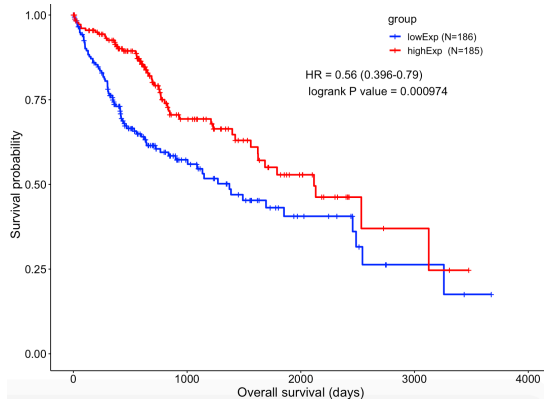

### COL15A1

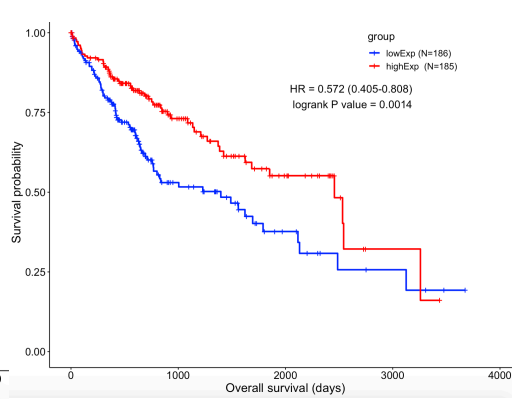

## (C) READ

### ATP8B2

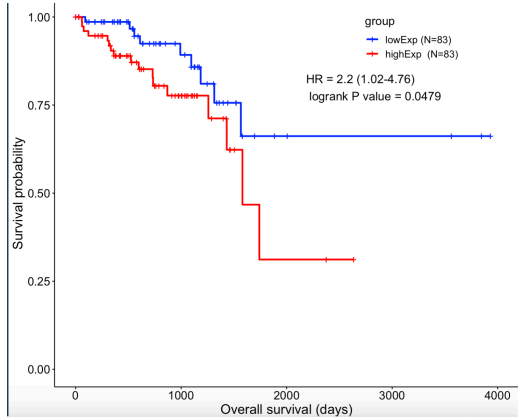

**(D) STAD**
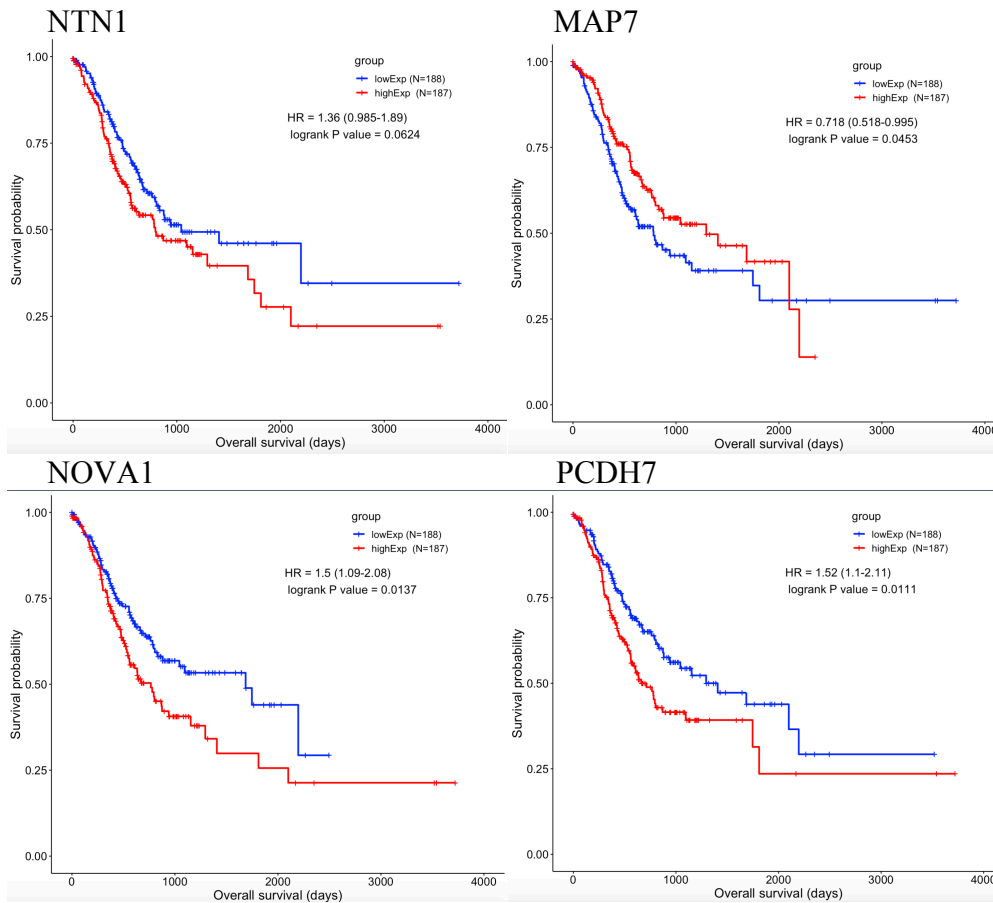
**(E) COAD**
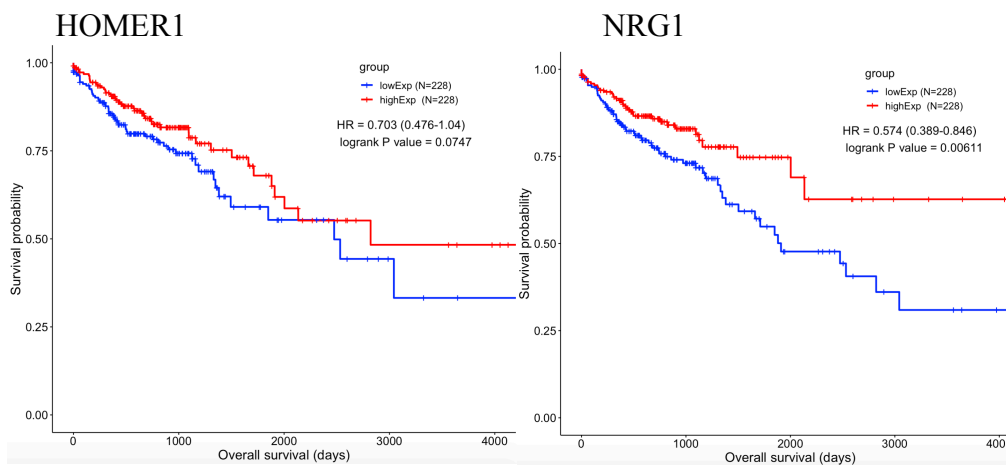

Supplement: Image2.pdf [file Image2.pdf]
