# Supplementary material for: LncRNA–miRNA–mRNA Networks of Gastrointestinal Cancers Representing Common and Specific LncRNAs and mRNAs
Source: PubMed Central journal article supplement (PMC8819090; doi:10.3389/fgene.2021.791919), 2022-01-24

C

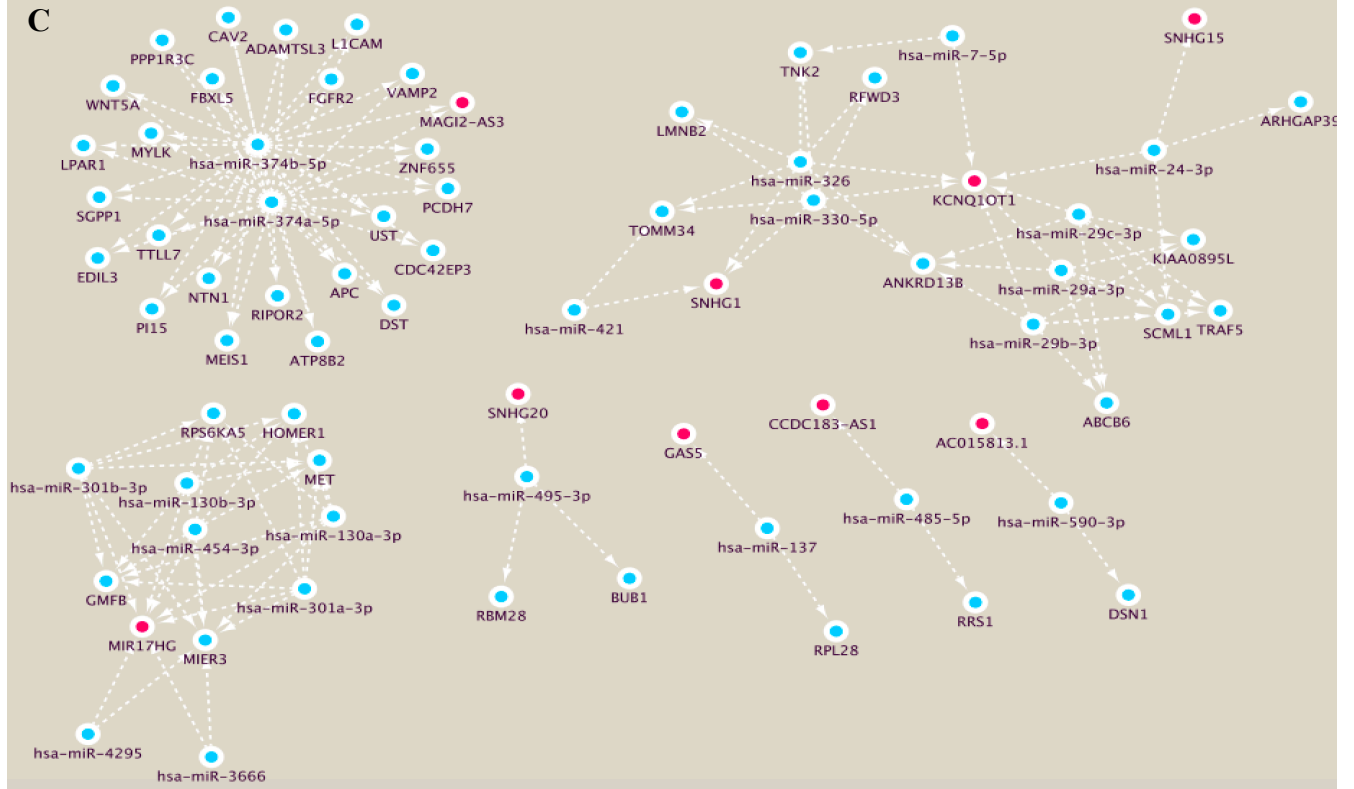

D

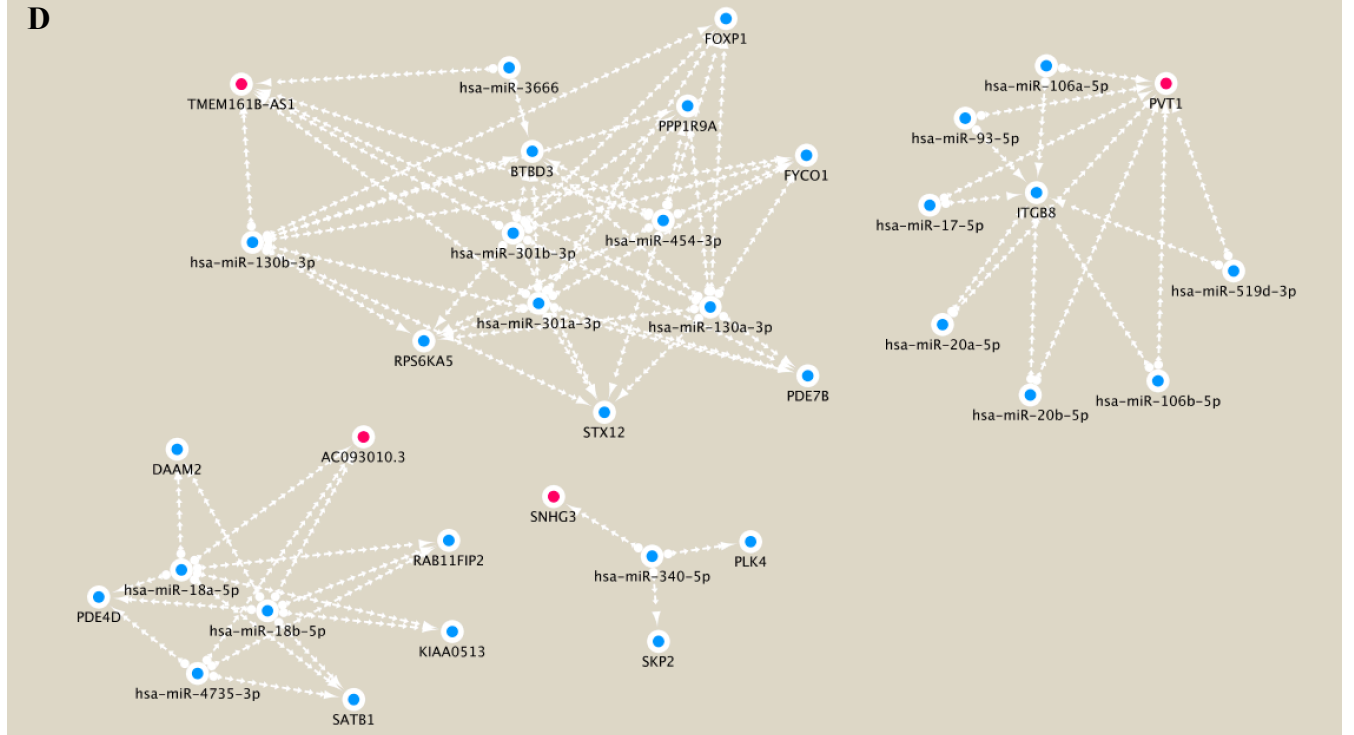

Supplement: Image1.pdf [file Image1.pdf]
