# Supplementary material for: LncRNA–miRNA–mRNA Networks of Gastrointestinal Cancers Representing Common and Specific LncRNAs and mRNAs
Source: PubMed Central journal article supplement (PMC8819090; doi:10.3389/fgene.2021.791919), 2022-01-24

**Supplementary Figure 3.** MRNAs with significant altered expression across tumor stages in ceRNA networks of GI cancers.

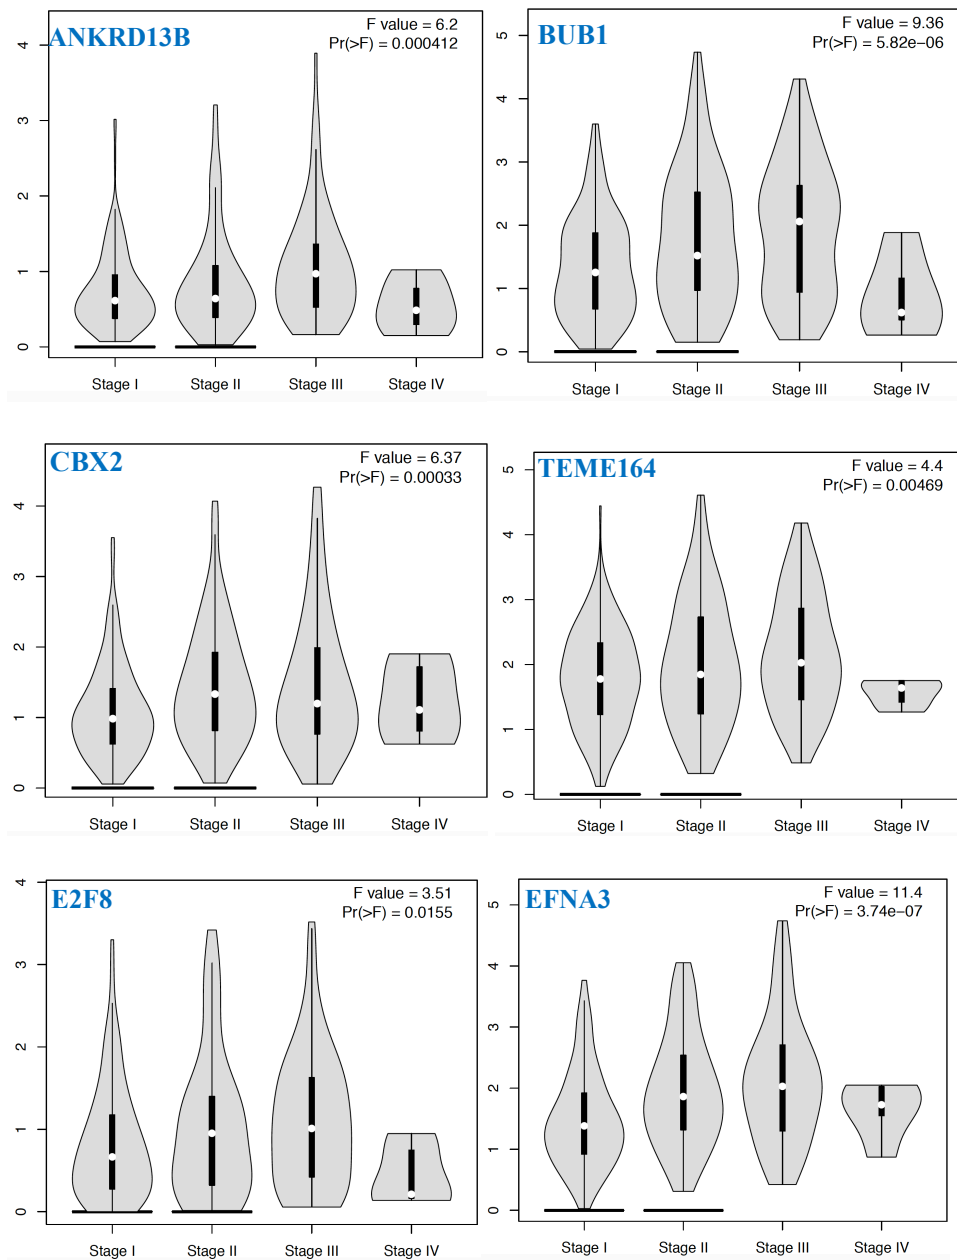

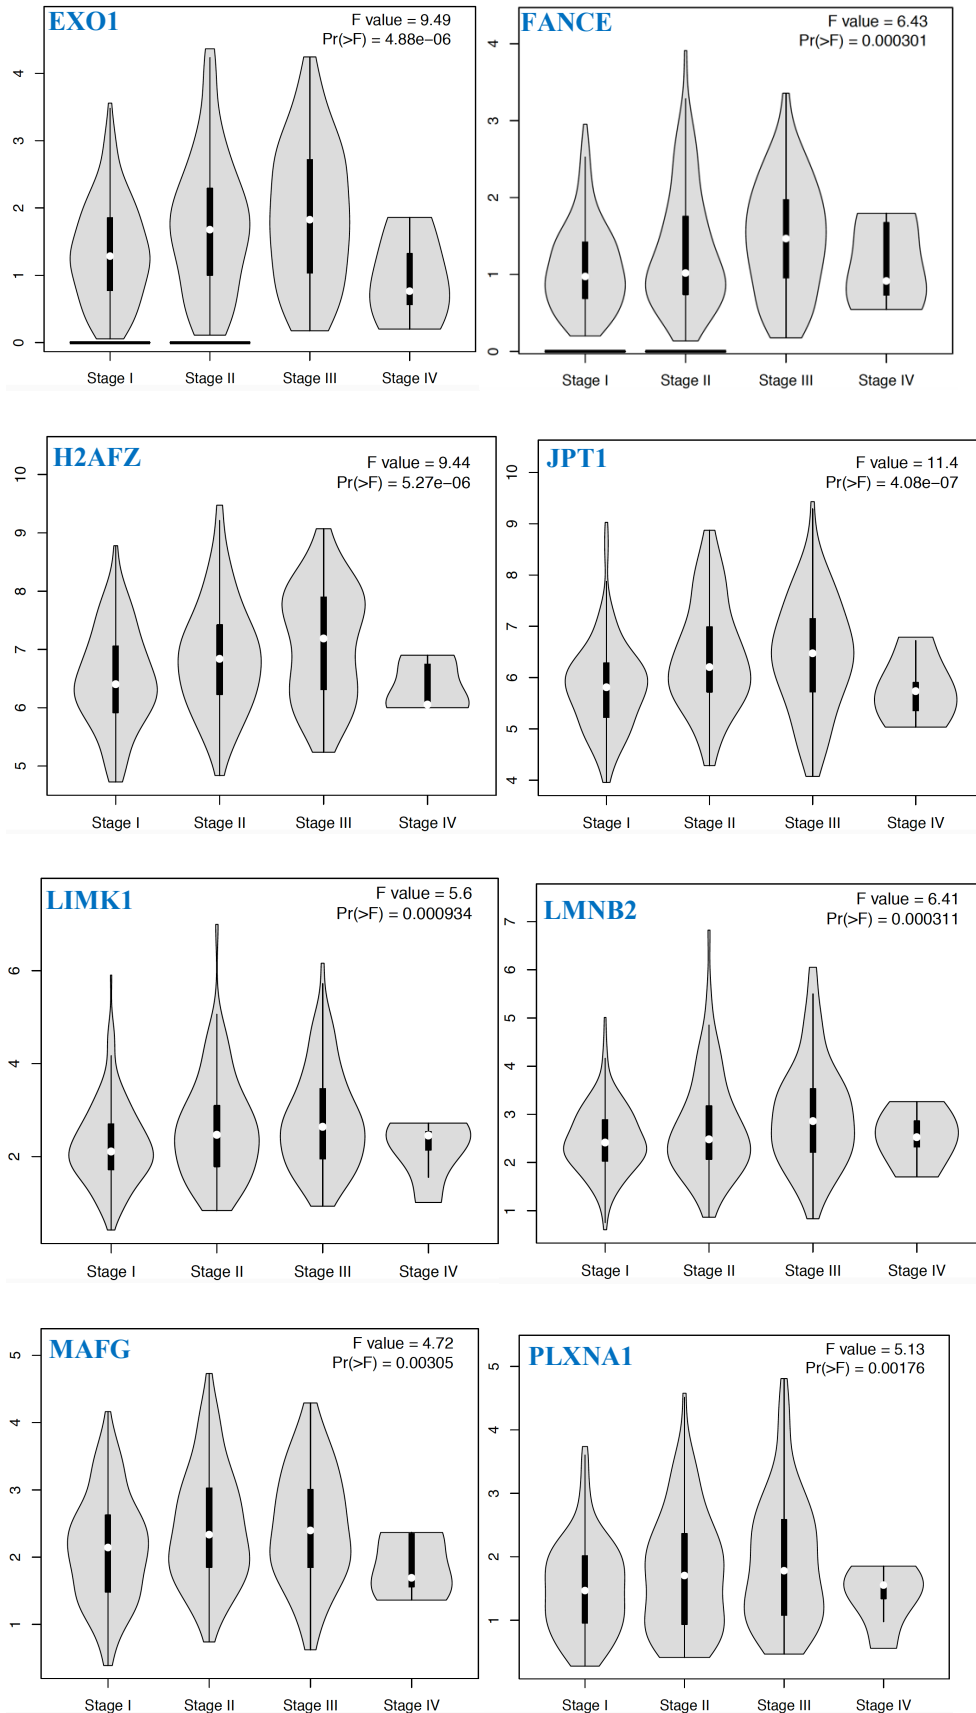

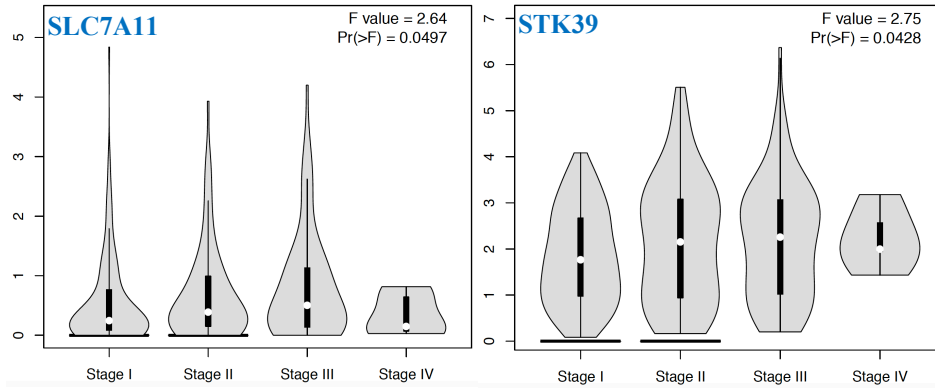

**SOX12 (SOX22)**

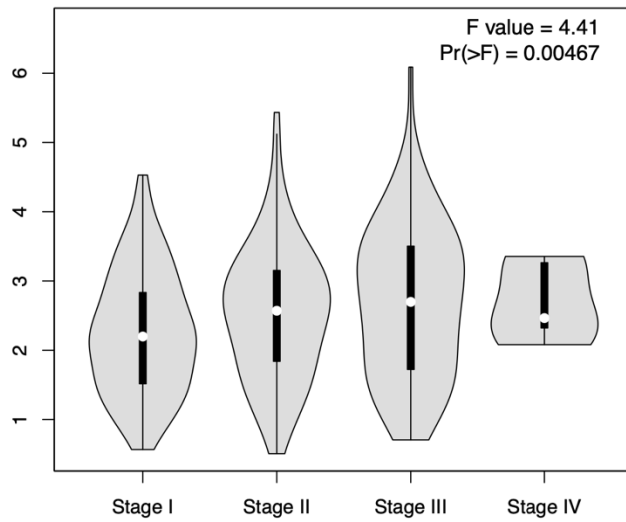

Supplement: Image3.pdf [file Image3.pdf]
