# Supplementary material for: LncRNA–miRNA–mRNA Networks of Gastrointestinal Cancers Representing Common and Specific LncRNAs and mRNAs
Source: PubMed Central journal article supplement (PMC8819090; doi:10.3389/fgene.2021.791919), 2022-01-24

**Supplementary Figure 4. GSEA of GI cancers. A: COAD, B: ESCA, C: HNSC, D: LIHC, E: READ, F: STAD.**

**(A) COAD**

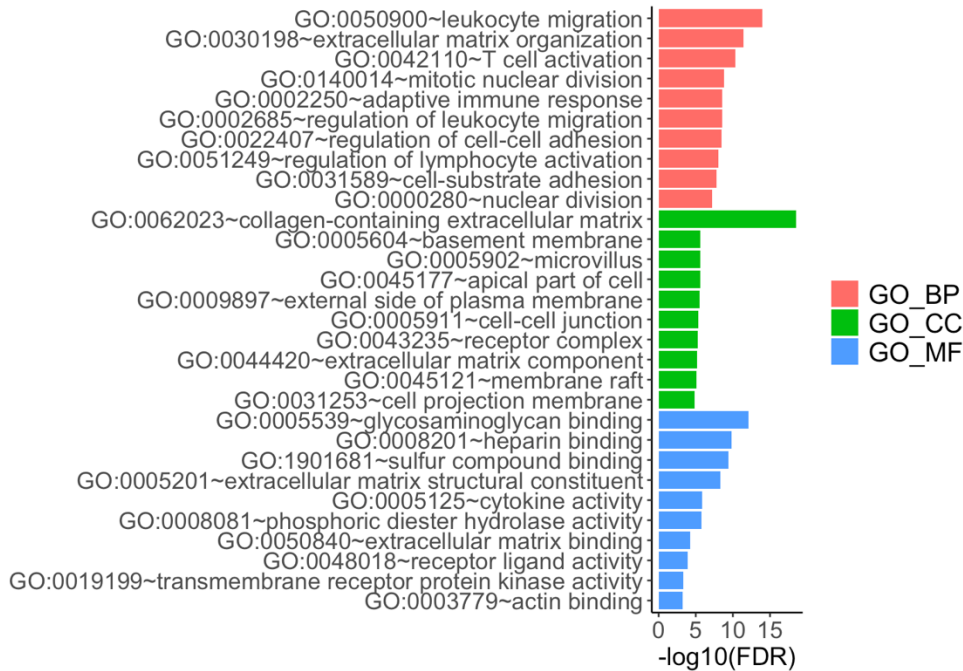

**(B) ESCA**

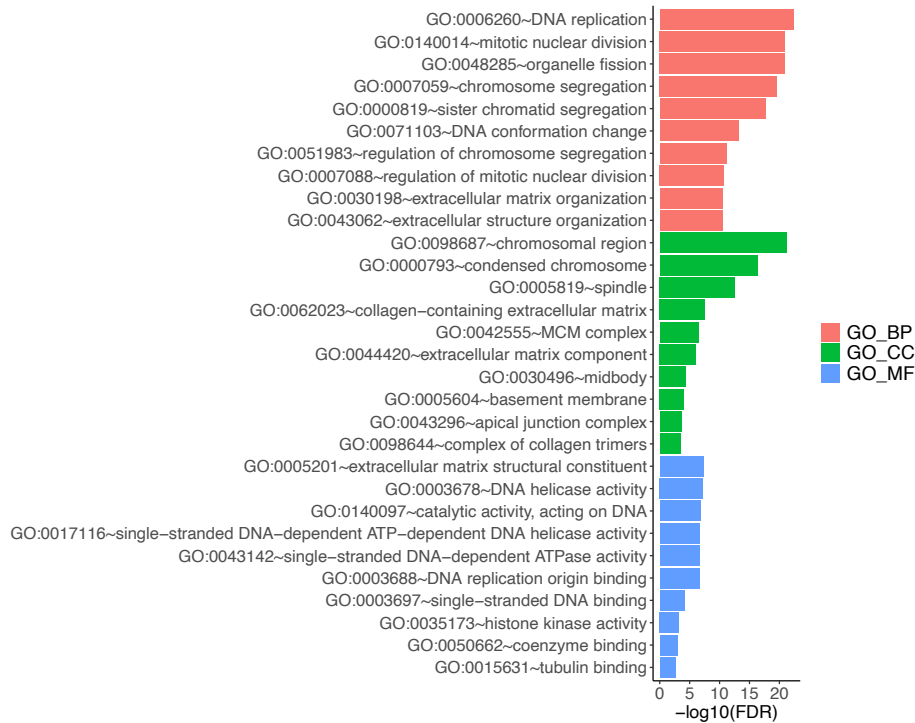

**(C) HNSC**
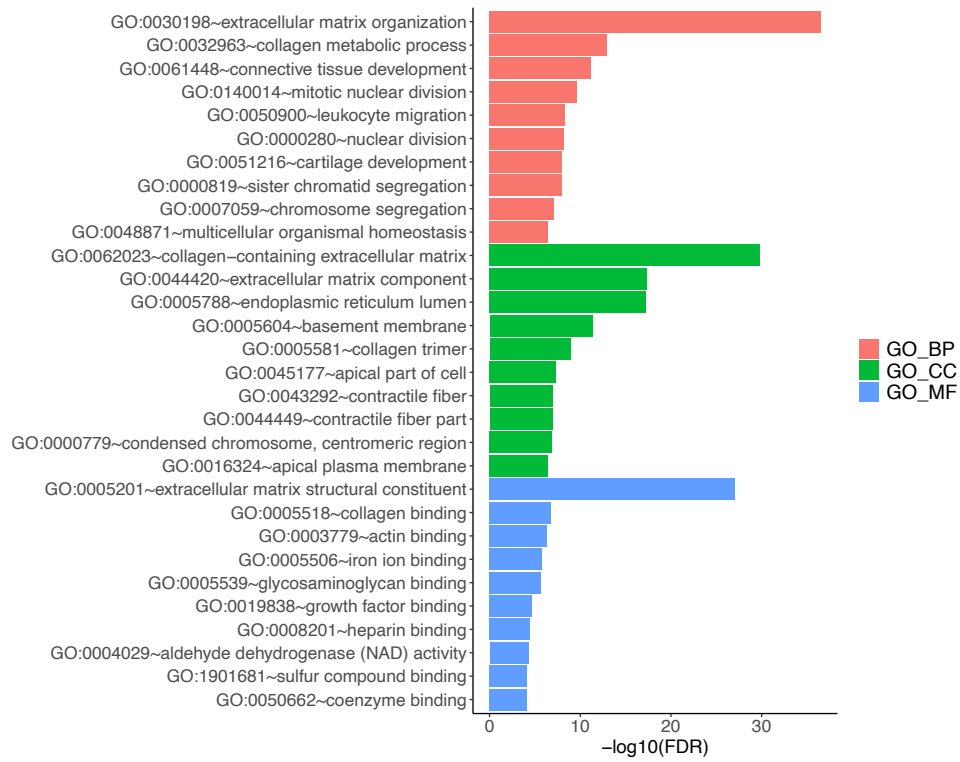
**(D) LIHC**

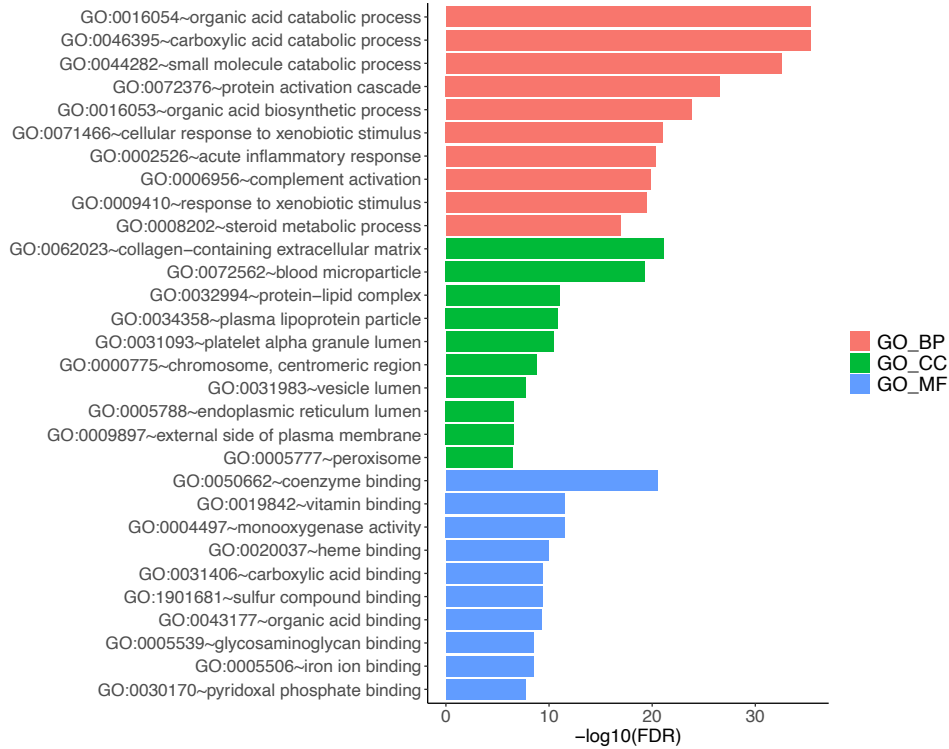

### (E) READ

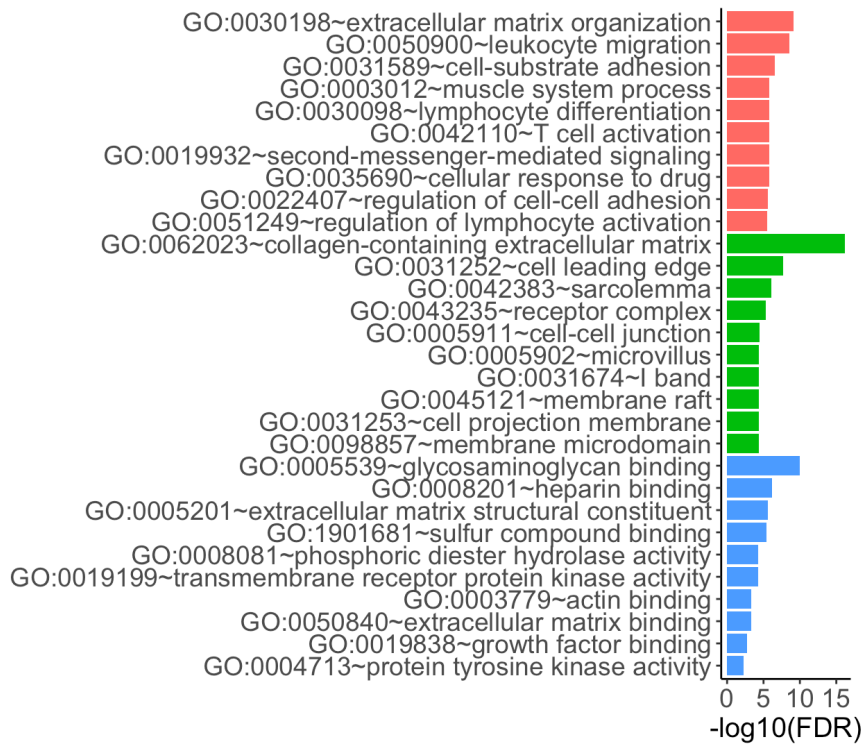

### (F) STAD

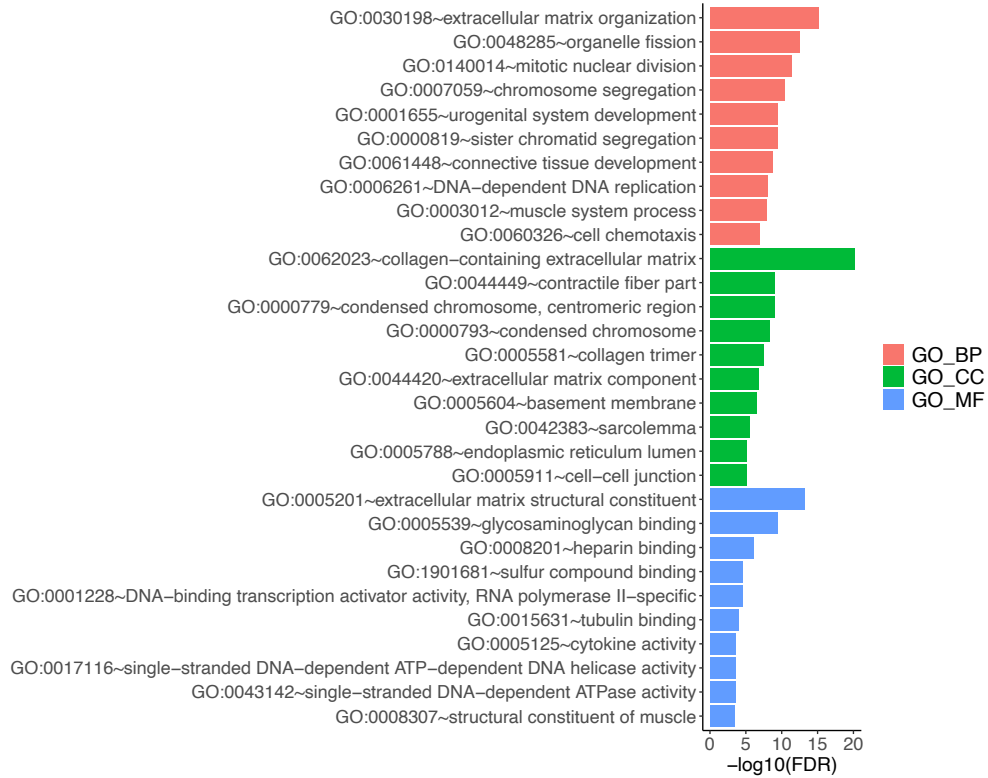

Supplement: Image4.pdf [file Image4.pdf]
