# Supplementary material for: LncRNA–miRNA–mRNA Networks of Gastrointestinal Cancers Representing Common and Specific LncRNAs and mRNAs
Source: Front Genet. 2022 Jan 24;12:791919. doi: 10.3389/fgene.2021.791919 (PMC8819090; doi:10.3389/fgene.2021.791919)
Supplement: Supplementary file 7 [file Table4.XLSX]

## Sheet: COAD
	Terms	Counts	GeneRatio	BgRatio	pValue	FDR	foldEnrichment	geneID	geneSymbol	Category
1	GO:0050900~leukocyte migration	138	138/2754	433/18012	1.64281e-18	1.01953e-14	2.08444	ENSG00000204936/ENSG00000160712/ENSG00000100604/ENSG00000105894/ENSG00000119919/ENSG00000154721/ENSG00000124205/ENSG00000271447/ENSG00000103257/ENSG00000107562/ENSG00000111863/ENSG00000171951/ENSG00000172349/ENSG00000170962/ENSG00000112175/ENSG00000136732/ENSG00000181374/ENSG00000157404/ENSG00000121807/ENSG00000135124/ENSG00000117115/ENSG00000160593/ENSG00000275718/ENSG00000105851/ENSG00000106299…	CD177/IL6R/CHGA/PTN/NKX2-3/JAM2/EDN3/MMP28/SLC7A5/CXCL12/ADTRP/SCG2/IL16/PDGFD/BMP5/GYPC/CCL13/KIT/CCR2/P2RX4/PADI2/JAML/CCL15/PIK3CG/WASL/PTGER4/CCL19/EDNRB/HMOX1/BDKRB1/CD48/CEACAM1/L1CAM/CCL28/CD44/TEK/VEGFA/SLIT2/CMKLR1/PTK2B/SLC3A2/PDE4D/JAM3/F2RL1/CAV1/CCL21/ITGB7/ITGA2/SMPD3/TNFRSF10B/BST1/RIPOR2/JCHAIN/S1PR1/NCKAP1L/CSF1/MAPK3/SLC7A11/AIF1/KITLG/SLC7A6/MCOLN2/LGALS3/ITGAL/IL23A/CCL11/ANGP…	GO_BP
2	GO:0030198~extracellular matrix organization	116	116/2754	365/18012	1.16888e-15	3.62703e-12	2.07856	ENSG00000168477/ENSG00000154175/ENSG00000154721/ENSG00000143196/ENSG00000077943/ENSG00000271447/ENSG00000046653/ENSG00000145681/ENSG00000101680/ENSG00000111863/ENSG00000159307/ENSG00000197614/ENSG00000137273/ENSG00000120708/ENSG00000125398/ENSG00000102265/ENSG00000122707/ENSG00000157766/ENSG00000026508/ENSG00000133392/ENSG00000172236/ENSG00000198759/ENSG00000143382/ENSG00000166482/ENSG00000123131…	TNXB/ABI3BP/JAM2/DPT/ITGA8/MMP28/GPM6B/HAPLN1/LAMA1/ADTRP/SCUBE1/MFAP5/FOXF2/TGFBI/SOX9/TIMP1/RECK/ACAN/CD44/MYH11/TPSAB1/EGFL6/ADAMTSL4/MFAP4/PRDX4/JAM3/DDR2/ITGA7/ICAM3/FBLN5/ITGB7/CAPN2/COL28A1/LOXL4/ITGA2/SMPD3/FGF2/FOXF1/MMP11/CTSS/NTN4/A2M/SERPINH1/BGN/PLOD3/CCDC80/OLFML2A/ITGAL/COL4A5/COL10A1/FLRT2/MMP25/NDNF/FBLN1/COL1A1/SPINK5/COL11A1/ITGA4/DCN/COL14A1/MMP7/FERMT1/ITGB3/LOXL2/COL7A1/PDGF…	GO_BP
3	GO:0042110~T cell activation	134	134/2754	462/18012	2.35977e-14	4.88158e-11	1.89697	ENSG00000160712/ENSG00000119919/ENSG00000090659/ENSG00000171916/ENSG00000127951/ENSG00000069974/ENSG00000137265/ENSG00000108773/ENSG00000160685/ENSG00000158473/ENSG00000107738/ENSG00000067955/ENSG00000171791/ENSG00000076641/ENSG00000157404/ENSG00000138735/ENSG00000121807/ENSG00000171793/ENSG00000139193/ENSG00000122224/ENSG00000104312/ENSG00000124766/ENSG00000160593/ENSG00000105851/ENSG00000171522…	IL6R/NKX2-3/CD209/LGALS9C/FGL2/RAB27A/IRF4/KAT2A/ZBTB7B/CD1D/VSIR/CBFB/BCL2/PAG1/KIT/PDE5A/CCR2/CTPS1/CD27/LY9/RIPK2/SOX4/JAML/PIK3CG/PTGER4/CCL19/CAMK4/HHLA2/CEACAM1/HSPD1/CD44/GSN/LEPR/LGALS9B/IL6ST/F2RL1/RUNX1/FANCA/CAV1/TESPA1/FKBP1B/CCL21/RSAD2/SOCS6/FZD5/KIF13B/APBB1IP/FANCD2/VSIG4/PRR7/TCF7/EBI3/ZC3H8/SMAD7/DOCK2/RIPOR2/CYP26B1/GLI3/NCKAP1L/LAX1/WAS/SASH3/CEBPB/AIF1/CR1/ZEB1/LGALS3/ITGAL/I…	GO_BP
4	GO:0140014~mitotic nuclear division	86	86/2754	265/18012	1.6373e-12	1.45159e-09	2.12251	ENSG00000079335/ENSG00000124205/ENSG00000071539/ENSG00000088325/ENSG00000175063/ENSG00000011426/ENSG00000146670/ENSG00000169679/ENSG00000132341/ENSG00000142945/ENSG00000175662/ENSG00000186185/ENSG00000089685/ENSG00000101057/ENSG00000087586/ENSG00000134057/ENSG00000099901/ENSG00000117650/ENSG00000137807/ENSG00000161800/ENSG00000136982/ENSG00000108106/ENSG00000090889/ENSG00000121152/ENSG00000119541…	CDC14A/EDN3/TRIP13/TPX2/UBE2C/ANLN/CDCA5/BUB1/RAN/KIF2C/TOM1L2/KIF18B/BIRC5/MYBL2/AURKA/CCNB1/RANBP1/NEK2/KIF23/RACGAP1/DSCC1/UBE2S/KIF4A/NCAPH/VPS4B/NCAPD3/PLK1/KIFC1/CDC6/RRS1/MAD2L1/PRC1/CHEK1/NUF2/MTBP/PCID2/KIF14/DSN1/PSRC1/CDCA8/PTTG1/KIF18A/TACC3/RCC1/SMPD3/PKMYT1/KLHDC8B/CENPF/KNTC1/MAD2L2/NCAPG/SPDL1/BUB1B/APC/CDC25C/NAA10/SPAG5/KNSTRN/TTK/CDT1/ESPL1/NUSAP1/CDC20/HASPIN/SGO1/AURKB/MZT1/D…	GO_BP
5	GO:0002250~adaptive immune response	117	117/2754	410/18012	3.49924e-12	2.71454e-09	1.86638	ENSG00000160712/ENSG00000105609/ENSG00000112936/ENSG00000102010/ENSG00000132514/ENSG00000166501/ENSG00000113303/ENSG00000090659/ENSG00000165406/ENSG00000127951/ENSG00000069974/ENSG00000137265/ENSG00000160685/ENSG00000158473/ENSG00000105369/ENSG00000081189/ENSG00000076641/ENSG00000121807/ENSG00000007312/ENSG00000139193/ENSG00000122224/ENSG00000104312/ENSG00000105851/ENSG00000172724/ENSG00000117322…	IL6R/LILRB5/C7/BMX/CLEC10A/PRKCB/BTNL8/CD209/MARCH8/FGL2/RAB27A/IRF4/ZBTB7B/CD1D/CD79A/MEF2C/PAG1/CCR2/CD79B/CD27/LY9/RIPK2/PIK3CG/CCL19/CR2/CAMK4/CD48/CEACAM1/HSPD1/RNF125/PTK2B/BTK/POU2F2/IL6ST/CLU/JAM3/ULBP3/SLAMF7/RSAD2/FZD5/EXO1/KLHL6/PRR7/EBI3/SMAD7/CTSS/JCHAIN/MAD2L2/SLAMF1/LAX1/C8G/WAS/SASH3/IGLL5/CR1/MCOLN2/TNFSF13/GCNT3/IL23A/SPN/PIK3CD/CD7/GPR183/TNFRSF13C/CD3E/ATAD5/TSTA3/FCGR2B/C1QA/…	GO_BP
6	GO:0002685~regulation of leukocyte migration	68	68/2754	192/18012	4.07223e-12	2.80803e-09	2.31636	ENSG00000160712/ENSG00000105894/ENSG00000124205/ENSG00000271447/ENSG00000107562/ENSG00000111863/ENSG00000170962/ENSG00000112175/ENSG00000121807/ENSG00000135124/ENSG00000117115/ENSG00000106299/ENSG00000171522/ENSG00000172724/ENSG00000100292/ENSG00000100739/ENSG00000151882/ENSG00000112715/ENSG00000145147/ENSG00000174600/ENSG00000120899/ENSG00000166086/ENSG00000164251/ENSG00000137077/ENSG00000164171…	IL6R/PTN/EDN3/MMP28/CXCL12/ADTRP/PDGFD/BMP5/CCR2/P2RX4/PADI2/WASL/PTGER4/CCL19/HMOX1/BDKRB1/CCL28/VEGFA/SLIT2/CMKLR1/PTK2B/JAM3/F2RL1/CCL21/ITGA2/SMPD3/BST1/RIPOR2/NCKAP1L/CSF1/MAPK3/AIF1/KITLG/LGALS3/IL23A/SPN/MTUS1/THBS4/ITGA4/CCL5/GCSAM/IL1R1/CXCL13/CAMK1D/LGALS9/RARRES2/DOCK8/CXCL8/ZP3/CCR7/C10orf99/DUSP1/SERPINE1/THY1/APOD/SELP/MST1/NOV/MIF/C3AR1/PGF/TNFSF14/WNT5A/TRPV4/CCL20/CCL24/CXCL10/CX…	GO_BP
7	GO:0022407~regulation of cell-cell adhesion	114	114/2754	398/18012	5.10606e-12	3.16882e-09	1.87335	ENSG00000111846/ENSG00000160712/ENSG00000167080/ENSG00000164442/ENSG00000151150/ENSG00000090659/ENSG00000107562/ENSG00000171916/ENSG00000111863/ENSG00000127951/ENSG00000162407/ENSG00000107937/ENSG00000160685/ENSG00000136826/ENSG00000158473/ENSG00000153162/ENSG00000107738/ENSG00000067955/ENSG00000076641/ENSG00000138735/ENSG00000121807/ENSG00000139193/ENSG00000104312/ENSG00000125845/ENSG00000172724…	GCNT2/IL6R/B4GALNT2/CITED2/ANK3/CD209/CXCL12/LGALS9C/ADTRP/FGL2/PLPP3/GTPBP4/ZBTB7B/KLF4/CD1D/BMP6/VSIR/CBFB/PAG1/PDE5A/CCR2/CD27/RIPK2/BMP2/CCL19/HHLA2/FXYD5/CEACAM1/HSPD1/CCL28/CD44/VEGFA/LGALS9B/IL6ST/RUNX1/CAV1/TESPA1/CCL21/SOCS6/VSIG4/EFNA5/PRKG1/CCM2L/EBI3/ZC3H8/SMAD7/RIPOR2/MAD2L2/GLI3/NCKAP1L/LAX1/SASH3/CEBPB/AIF1/LGALS3/IL23A/TNFAIP8L2/SPN/ITGA4/TNFRSF13C/CD3E/GRAP2/VAV1/CCL5/FCGR2B/HSPH…	GO_BP
8	GO:0051249~regulation of lymphocyte activation	116	116/2754	415/18012	1.86596e-11	9.65012e-09	1.82813	ENSG00000160712/ENSG00000090659/ENSG00000171916/ENSG00000127951/ENSG00000137265/ENSG00000108773/ENSG00000160685/ENSG00000158473/ENSG00000107738/ENSG00000196950/ENSG00000081189/ENSG00000067955/ENSG00000171791/ENSG00000076641/ENSG00000138735/ENSG00000121807/ENSG00000139193/ENSG00000104312/ENSG00000172724/ENSG00000012124/ENSG00000152495/ENSG00000114455/ENSG00000079385/ENSG00000144381/ENSG00000170476…	IL6R/CD209/LGALS9C/FGL2/IRF4/KAT2A/ZBTB7B/CD1D/VSIR/SLC39A10/MEF2C/CBFB/BCL2/PAG1/PDE5A/CCR2/CD27/RIPK2/CCL19/CD22/CAMK4/HHLA2/CEACAM1/HSPD1/MZB1/GSN/BTK/TOX/LGALS9B/INHBA/IL6ST/RUNX1/FANCA/CAV1/TESPA1/CCL21/SOCS6/PCID2/FANCD2/VSIG4/EBI3/ZC3H8/SMAD7/BST1/RIPOR2/CYP26B1/MAD2L2/GLI3/NCKAP1L/LAX1/SASH3/CEBPB/IGLL5/AIF1/CR1/ZEB1/TNFSF13/LGALS3/IL23A/TNFAIP8L2/SPN/MIR17HG/SPINK5/GPR183/TNFRSF13C/CD3E/…	GO_BP
9	GO:0031589~cell-substrate adhesion	101	101/2754	348/18012	3.65891e-11	1.62194e-08	1.89819	ENSG00000111846/ENSG00000133800/ENSG00000168309/ENSG00000154175/ENSG00000105894/ENSG00000138722/ENSG00000135218/ENSG00000070759/ENSG00000077943/ENSG00000046653/ENSG00000129474/ENSG00000006327/ENSG00000164176/ENSG00000171791/ENSG00000112276/ENSG00000172661/ENSG00000127990/ENSG00000088827/ENSG00000153094/ENSG00000090020/ENSG00000198910/ENSG00000151882/ENSG00000026508/ENSG00000120156/ENSG00000112715…	GCNT2/LYVE1/FAM107A/ABI3BP/PTN/MMRN1/CD36/TESK2/ITGA8/GPM6B/AJUBA/TNFRSF12A/EDIL3/BCL2/BVES/WASHC2C/SGCE/SIGLEC1/BCL2L11/SLC9A1/L1CAM/CCL28/CD44/TEK/VEGFA/PTK2B/EGFL6/ILK/LIMS2/ACVRL1/JAM3/CCL21/DDR2/ITGA7/FBLN5/ITGB7/KIF14/CD96/EFNA5/ITGA2/TIAM1/FOXF1/PPARD/BST1/NTN4/PLAU/CSF1/VWA2/CCDC80/SORBS1/ADAMTS12/ITGAL/ANGPT1/NDNF/HPSE/FBLN1/COL1A1/ITGA4/CD3E/FERMT2/FERMT1/ITGB3/MMRN2/AXL/ANGPT2/NEDD9/TY…	GO_BP
10	GO:0000280~nuclear division	112	112/2754	409/18012	1.62269e-10	6.7136e-08	1.79099	ENSG00000079335/ENSG00000124205/ENSG00000071539/ENSG00000101224/ENSG00000088325/ENSG00000175063/ENSG00000011426/ENSG00000146670/ENSG00000169679/ENSG00000132341/ENSG00000142945/ENSG00000175662/ENSG00000172572/ENSG00000181773/ENSG00000186185/ENSG00000089685/ENSG00000101057/ENSG00000087586/ENSG00000134057/ENSG00000099901/ENSG00000117650/ENSG00000137807/ENSG00000126803/ENSG00000161800/ENSG00000136982…	CDC14A/EDN3/TRIP13/CDC25B/TPX2/UBE2C/ANLN/CDCA5/BUB1/RAN/KIF2C/TOM1L2/PDE3A/GPR3/KIF18B/BIRC5/MYBL2/AURKA/CCNB1/RANBP1/NEK2/KIF23/HSPA2/RACGAP1/DSCC1/EME1/UBE2S/KIF4A/NCAPH/CKS2/VPS4B/NCAPD3/PLK1/FANCA/KIFC1/CDC6/RRS1/MAD2L1/PRC1/MEI1/CHEK1/BRCA2/RAD54B/NUF2/MTBP/PCID2/KIF14/DSN1/PSRC1/FANCD2/CDCA8/RAD54L/TOP2A/PTTG1/CCNB1IP1/KIF18A/MAPK15/TACC3/RCC1/SMPD3/PKMYT1/KLHDC8B/CENPF/KNTC1/MSX1/CYP26B1/…	GO_BP
11	GO:0050920~regulation of chemotaxis	69	69/2754	212/18012	2.21735e-10	8.60056e-08	2.12868	ENSG00000160712/ENSG00000137872/ENSG00000105894/ENSG00000124205/ENSG00000271447/ENSG00000198121/ENSG00000107562/ENSG00000010319/ENSG00000171951/ENSG00000130449/ENSG00000105976/ENSG00000172349/ENSG00000170962/ENSG00000092421/ENSG00000121807/ENSG00000135124/ENSG00000117115/ENSG00000172724/ENSG00000112715/ENSG00000145147/ENSG00000174600/ENSG00000120899/ENSG00000166086/ENSG00000164251/ENSG00000108379…	IL6R/SEMA6D/PTN/EDN3/MMP28/LPAR1/CXCL12/SEMA3G/SCG2/ZSWIM6/MET/IL16/PDGFD/SEMA6A/CCR2/P2RX4/PADI2/CCL19/VEGFA/SLIT2/CMKLR1/PTK2B/JAM3/F2RL1/WNT3/CCL21/ZSWIM4/ITGA2/TIAM1/FGF2/BST1/RIPOR2/S1PR1/NCKAP1L/CSF1/MAPK3/AIF1/SEMA4G/IL23A/MTUS1/THBS4/GPR183/CCL5/PDGFRA/ANGPT2/TUBB2B/CXCL13/CAMK1D/LGALS9/RARRES2/FGFR1/CXCL8/CCR7/DUSP1/GSTP1/SERPINE1/MST1/FGF18/SEMA3B/NOV/MIF/C3AR1/PGF/TNFSF14/WNT5A/TRPV4/C…	GO_BP
12	GO:0070661~leukocyte proliferation	87	87/2754	297/18012	4.97726e-10	1.69812e-07	1.91585	ENSG00000160712/ENSG00000154822/ENSG00000090659/ENSG00000171916/ENSG00000160685/ENSG00000158473/ENSG00000107738/ENSG00000196950/ENSG00000105369/ENSG00000081189/ENSG00000171791/ENSG00000157404/ENSG00000138735/ENSG00000121807/ENSG00000171793/ENSG00000104312/ENSG00000105851/ENSG00000172724/ENSG00000117322/ENSG00000012124/ENSG00000114455/ENSG00000156738/ENSG00000144381/ENSG00000106348/ENSG00000170476…	IL6R/PLCL2/CD209/LGALS9C/ZBTB7B/CD1D/VSIR/SLC39A10/CD79A/MEF2C/BCL2/KIT/PDE5A/CCR2/CTPS1/RIPK2/PIK3CG/CCL19/CR2/CD22/HHLA2/MS4A1/HSPD1/IMPDH1/MZB1/CD180/BTK/LGALS9B/IL6ST/CLU/F2RL1/FKBP1B/VSIG4/HELLS/EBI3/DOCK2/BST1/NCKAP1L/SASH3/CEBPB/CSF1/AIF1/KITLG/LGALS3/IL23A/SPN/CSF1R/GPR183/TNFRSF13C/CD3E/ATAD5/CD38/CCL5/FCGR2B/IKZF3/CDKN1A/LEF1/SHH/CD4/PTPRC/LGALS9/DOCK8/IL18/HHEX/CD28/ZP3/P2RX7/ENPP3/GST…	GO_BP
13	GO:0001655~urogenital system development	94	94/2754	330/18012	5.1989e-10	1.69812e-07	1.863	ENSG00000160712/ENSG00000099139/ENSG00000077943/ENSG00000138193/ENSG00000118526/ENSG00000141052/ENSG00000104267/ENSG00000164120/ENSG00000125398/ENSG00000170962/ENSG00000153162/ENSG00000081189/ENSG00000171791/ENSG00000134245/ENSG00000176928/ENSG00000066468/ENSG00000136997/ENSG00000124766/ENSG00000125845/ENSG00000103494/ENSG00000128059/ENSG00000075239/ENSG00000153094/ENSG00000120156/ENSG00000112715…	IL6R/PCSK5/ITGA8/PLCE1/TCF21/MYOCD/CA2/HPGD/SOX9/PDGFD/BMP6/MEF2C/BCL2/WNT2B/GCNT4/FGFR2/MYC/SOX4/BMP2/RPGRIP1L/PPAT/ACAT1/BCL2L11/TEK/VEGFA/SLIT2/EAF2/CEP55/ILK/KANK2/WDR77/MAGI2/LGR4/RXRA/NLE1/ADAMTS1/AQP11/ODC1/FGF2/SMAD7/FOXF1/AR/PBX1/LRRK2/CENPF/CYP26B1/GLI3/TNS2/STRA6/LIF/GCNT3/ANGPT1/PCSK9/DCN/PDGFRA/RET/ANGPT2/SOX17/EPHA4/DACT2/COL4A1/KIF26B/SHH/FGFR1/SALL1/EPHB3/COL4A4/BMP4/NOTCH3/PYGO1/…	GO_BP
14	GO:0050863~regulation of T cell activation	90	90/2754	312/18012	5.99343e-10	1.85701e-07	1.88663	ENSG00000160712/ENSG00000090659/ENSG00000171916/ENSG00000127951/ENSG00000137265/ENSG00000108773/ENSG00000160685/ENSG00000158473/ENSG00000107738/ENSG00000067955/ENSG00000076641/ENSG00000138735/ENSG00000121807/ENSG00000139193/ENSG00000104312/ENSG00000172724/ENSG00000152495/ENSG00000114455/ENSG00000079385/ENSG00000144381/ENSG00000148180/ENSG00000170298/ENSG00000134352/ENSG00000159216/ENSG00000187741…	IL6R/CD209/LGALS9C/FGL2/IRF4/KAT2A/ZBTB7B/CD1D/VSIR/CBFB/PAG1/PDE5A/CCR2/CD27/RIPK2/CCL19/CAMK4/HHLA2/CEACAM1/HSPD1/GSN/LGALS9B/IL6ST/RUNX1/FANCA/CAV1/TESPA1/CCL21/SOCS6/FANCD2/VSIG4/EBI3/ZC3H8/SMAD7/RIPOR2/CYP26B1/GLI3/NCKAP1L/LAX1/SASH3/CEBPB/AIF1/CR1/ZEB1/LGALS3/IL23A/TNFAIP8L2/SPN/SPINK5/TNFRSF13C/CD3E/GRAP2/VAV1/CCL5/FCGR2B/HSPH1/SHH/CD4/PTPRC/LAG3/LGALS9/DOCK8/DUSP10/IL18/CD28/ZP3/CCR7/PTPN…	GO_BP
15	GO:0019932~second-messenger-mediated signaling	115	115/2754	437/18012	1.23827e-09	3.34118e-07	1.72113	ENSG00000100604/ENSG00000145362/ENSG00000173175/ENSG00000186642/ENSG00000146469/ENSG00000183134/ENSG00000124205/ENSG00000135218/ENSG00000172348/ENSG00000138193/ENSG00000116833/ENSG00000186469/ENSG00000198121/ENSG00000150471/ENSG00000164850/ENSG00000198523/ENSG00000005249/ENSG00000162104/ENSG00000160191/ENSG00000100302/ENSG00000197943/ENSG00000125398/ENSG00000166869/ENSG00000149596/ENSG00000169418…	CHGA/ANK2/ADCY5/PDE2A/VIP/PTGDR2/EDN3/CD36/RCAN2/PLCE1/NR5A2/GNG2/LPAR1/ADGRL3/GPER1/PLN/PRKAR2B/ADCY9/PDE9A/RASD2/PLCG2/SOX9/CHP2/JPH2/NPR1/PDE5A/CCR2/CHP1/P2RX4/AKAP6/GSTM2/GNA13/PTGER4/EDNRB/CD22/SRI/PDE3A/DYRK2/SLC9A1/RCAN1/GPR3/GNAL/GNAI1/VEGFA/MT2A/CMKLR1/CLIC2/PTK2B/BTK/DEFB1/GRIN2D/PDE4D/LGR4/ITPR1/FKBP1B/PDK2/JPH1/DMD/ADRA2A/APLP1/PDX1/NRG1/RGS2/CAMK2D/PRKG1/ATP2B4/SLC8A1/GNAQ/BST1/LRRK2…	GO_BP
16	GO:0051783~regulation of nuclear division	61	61/2754	188/18012	2.76995e-09	6.61165e-07	2.12212	ENSG00000079335/ENSG00000124205/ENSG00000071539/ENSG00000175063/ENSG00000011426/ENSG00000146670/ENSG00000169679/ENSG00000175662/ENSG00000172572/ENSG00000181773/ENSG00000087586/ENSG00000134057/ENSG00000099901/ENSG00000117650/ENSG00000119541/ENSG00000166851/ENSG00000094804/ENSG00000164109/ENSG00000149554/ENSG00000172167/ENSG00000126226/ENSG00000164611/ENSG00000181085/ENSG00000013810/ENSG00000180198…	CDC14A/EDN3/TRIP13/UBE2C/ANLN/CDCA5/BUB1/TOM1L2/PDE3A/GPR3/AURKA/CCNB1/RANBP1/NEK2/VPS4B/PLK1/CDC6/MAD2L1/CHEK1/MTBP/PCID2/PTTG1/MAPK15/TACC3/RCC1/SMPD3/PKMYT1/CENPF/KNTC1/MSX1/MAD2L2/SPDL1/BUB1B/APC/CDC25C/NAA10/TTK/CDT1/LIF/ESPL1/NUSAP1/CDC20/MSX2/AURKB/DLGAP5/TGFA/CENPE/MKI67/CD28/DUSP1/BMP4/IL1A/HSPA1A/HECW2/MAP9/NPM2/WNT5A/SPHK1/BMP7/EREG/IL1B	GO_BP
17	GO:0061448~connective tissue development	79	79/2754	270/18012	3.27232e-09	7.00276e-07	1.91364	ENSG00000160712/ENSG00000006747/ENSG00000120708/ENSG00000125398/ENSG00000170962/ENSG00000153162/ENSG00000112175/ENSG00000081189/ENSG00000102265/ENSG00000134245/ENSG00000135446/ENSG00000125845/ENSG00000075239/ENSG00000178573/ENSG00000043039/ENSG00000109819/ENSG00000157766/ENSG00000168077/ENSG00000026508/ENSG00000139567/ENSG00000133104/ENSG00000103056/ENSG00000143816/ENSG00000138685/ENSG00000062282…	IL6R/SCIN/TGFBI/SOX9/PDGFD/BMP6/BMP5/MEF2C/TIMP1/WNT2B/CDK4/BMP2/ACAT1/MAF/BARX2/PPARGC1A/ACAN/SCARA3/CD44/ACVRL1/SPART/SMPD3/WNT9A/FGF2/DGAT2/MATN2/PPARD/MSX1/GLI3/SERPINH1/CSF1/VWA2/MAPK3/MGP/SNAI1/ZEB1/ADAMTS12/EFEMP1/HYAL3/COL1A1/WISP1/COL11A1/MSX2/COL14A1/LOXL2/COL7A1/STC1/PITX1/TRPM4/FRZB/AXIN2/COL12A1/WNT5B/CHI3L1/FGFR1/COMP/SOX6/BMP4/SFRP2/FGF18/ACTA2/NOV/MATN3/COL27A1/ROR2/COL5A1/SATB2/R…	GO_BP
18	GO:0007159~leukocyte cell-cell adhesion	92	92/2754	332/18012	3.65781e-09	7.5668e-07	1.81237	ENSG00000204936/ENSG00000160712/ENSG00000090659/ENSG00000107562/ENSG00000171916/ENSG00000111863/ENSG00000127951/ENSG00000160685/ENSG00000136826/ENSG00000158473/ENSG00000107738/ENSG00000067955/ENSG00000076641/ENSG00000138735/ENSG00000121807/ENSG00000139193/ENSG00000104312/ENSG00000172724/ENSG00000114455/ENSG00000079385/ENSG00000144381/ENSG00000151882/ENSG00000026508/ENSG00000170298/ENSG00000134352…	CD177/IL6R/CD209/CXCL12/LGALS9C/ADTRP/FGL2/ZBTB7B/KLF4/CD1D/VSIR/CBFB/PAG1/PDE5A/CCR2/CD27/RIPK2/CCL19/HHLA2/CEACAM1/HSPD1/CCL28/CD44/LGALS9B/IL6ST/RUNX1/CAV1/TESPA1/CCL21/SOCS6/ITGB7/VSIG4/EBI3/ZC3H8/SMAD7/RIPOR2/GLI3/NCKAP1L/LAX1/SASH3/CEBPB/AIF1/LGALS3/ITGAL/IL23A/TNFAIP8L2/SPN/ITGA4/TNFRSF13C/CD3E/GRAP2/VAV1/TSTA3/CCL5/FCGR2B/HSPH1/SHH/CD4/PTPRC/LAG3/LGALS9/DOCK8/FERMT3/DUSP10/IL18/CD28/PODXL…	GO_BP
19	GO:0000070~mitotic sister chromatid segregation	52	52/2754	152/18012	5.30163e-09	1.06135e-06	2.23747	ENSG00000071539/ENSG00000146670/ENSG00000169679/ENSG00000132341/ENSG00000142945/ENSG00000186185/ENSG00000134057/ENSG00000117650/ENSG00000137807/ENSG00000161800/ENSG00000136982/ENSG00000090889/ENSG00000121152/ENSG00000119541/ENSG00000151503/ENSG00000166851/ENSG00000237649/ENSG00000094804/ENSG00000179041/ENSG00000164109/ENSG00000198901/ENSG00000143228/ENSG00000126226/ENSG00000118193/ENSG00000149636…	TRIP13/CDCA5/BUB1/RAN/KIF2C/KIF18B/CCNB1/NEK2/KIF23/RACGAP1/DSCC1/KIF4A/NCAPH/VPS4B/NCAPD3/PLK1/KIFC1/CDC6/RRS1/MAD2L1/PRC1/NUF2/PCID2/KIF14/DSN1/PSRC1/CDCA8/PTTG1/KIF18A/TACC3/CENPF/MAD2L2/NCAPG/SPDL1/BUB1B/APC/NAA10/SPAG5/KNSTRN/TTK/CDT1/ESPL1/NUSAP1/CDC20/HASPIN/SGO1/AURKB/DLGAP5/CENPE/DUSP1/CENPK/HECW2	GO_BP
20	GO:0003012~muscle system process	115	115/2754	451/18012	8.74612e-09	1.6448e-06	1.66771	ENSG00000100604/ENSG00000145362/ENSG00000101605/ENSG00000169860/ENSG00000087258/ENSG00000124205/ENSG00000108405/ENSG00000138193/ENSG00000177098/ENSG00000141052/ENSG00000006704/ENSG00000152642/ENSG00000004776/ENSG00000182253/ENSG00000198771/ENSG00000156113/ENSG00000075073/ENSG00000164850/ENSG00000198523/ENSG00000160191/ENSG00000163431/ENSG00000136826/ENSG00000081189/ENSG00000198125/ENSG00000157404…	CHGA/ANK2/MYOM1/P2RY1/GNAO1/EDN3/P2RX1/PLCE1/SCN4B/MYOCD/GTF2IRD1/GPD1L/HSPB6/SYNM/RCSD1/KCNMA1/TACR2/GPER1/PLN/PDE9A/LMOD1/KLF4/MEF2C/MB/KIT/PDE5A/CRYAB/NEDD4L/P2RX4/AKAP6/GSTM2/CHRNA3/EZH2/PIK3CG/ARHGAP42/EDNRB/MYLK/CACNB2/PPP1R12B/HMOX1/SRI/SSPN/PPARGC1A/SLC9A1/CNN1/BDKRB2/MYH11/GSN/CLIC2/SNTB1/DSC2/IL6ST/PDE4D/CAV1/FKBP1B/CAMTA2/OXTR/DMD/SCN1B/ADRA2A/CCDC78/HOMER1/ATP2B1/ACTG2/RGS2/CACNA2D1/C…	GO_BP
21	GO:0032649~regulation of interferon-gamma production	38	38/2754	98/18012	1.28602e-08	2.19e-06	2.53604	ENSG00000160712/ENSG00000171916/ENSG00000164342/ENSG00000107738/ENSG00000121807/ENSG00000104312/ENSG00000196664/ENSG00000144381/ENSG00000170298/ENSG00000122641/ENSG00000113448/ENSG00000163251/ENSG00000153283/ENSG00000105246/ENSG00000122122/ENSG00000110944/ENSG00000159958/ENSG00000198851/ENSG00000167601/ENSG00000115594/ENSG00000168961/ENSG00000150637/ENSG00000150782/ENSG00000170458/ENSG00000188372…	IL6R/LGALS9C/TLR3/VSIR/CCR2/RIPK2/TLR7/HSPD1/LGALS9B/INHBA/PDE4D/FZD5/CD96/EBI3/SASH3/IL23A/TNFRSF13C/CD3E/AXL/IL1R1/LGALS9/CD226/IL18/CD14/ZP3/CCR7/TLR8/PTPN22/SLC11A1/SLAMF6/LILRB1/CD2/FOXP3/HLA-DPB1/HLA-DPA1/WNT5A/PDCD1LG2/IL1B	GO_BP
22	GO:0032609~interferon-gamma production	41	41/2754	110/18012	1.34096e-08	2.19e-06	2.43775	ENSG00000160712/ENSG00000171916/ENSG00000164342/ENSG00000107738/ENSG00000121807/ENSG00000104312/ENSG00000196664/ENSG00000144381/ENSG00000170298/ENSG00000122641/ENSG00000113448/ENSG00000164251/ENSG00000163251/ENSG00000153283/ENSG00000105246/ENSG00000122122/ENSG00000110944/ENSG00000197471/ENSG00000159958/ENSG00000198851/ENSG00000167601/ENSG00000115594/ENSG00000168961/ENSG00000150637/ENSG00000150782…	IL6R/LGALS9C/TLR3/VSIR/CCR2/RIPK2/TLR7/HSPD1/LGALS9B/INHBA/PDE4D/F2RL1/FZD5/CD96/EBI3/SASH3/IL23A/SPN/TNFRSF13C/CD3E/AXL/IL1R1/LGALS9/CD226/IL18/CD14/ZP3/CCR7/TLR8/PTPN22/ITK/SLC11A1/SLAMF6/LILRB1/CD2/FOXP3/HLA-DPB1/HLA-DPA1/WNT5A/PDCD1LG2/IL1B	GO_BP
23	GO:0000302~response to reactive oxygen species	67	67/2754	223/18012	1.59028e-08	2.40715e-06	1.96502	ENSG00000087258/ENSG00000135218/ENSG00000158828/ENSG00000183010/ENSG00000073417/ENSG00000105976/ENSG00000136826/ENSG00000244734/ENSG00000170962/ENSG00000171791/ENSG00000155846/ENSG00000198125/ENSG00000141570/ENSG00000109846/ENSG00000130766/ENSG00000123374/ENSG00000170075/ENSG00000106462/ENSG00000172724/ENSG00000126602/ENSG00000100292/ENSG00000114346/ENSG00000109819/ENSG00000120899/ENSG00000010671…	GNAO1/CD36/PINK1/PYCR1/PDE8A/MET/KLF4/HBB/PDGFD/BCL2/PPARGC1B/MB/CBX8/CRYAB/SESN2/CDK2/GPR37L1/EZH2/CCL19/TRAP1/HMOX1/ECT2/PPARGC1A/PTK2B/BTK/FKBP1B/PDK2/CDK1/HBA2/FBLN5/SIGMAR1/CAPN2/AGAP3/TXNIP/NCF1/SMPD3/TRPA1/SLC8A1/LRRK2/TPM1/MAPK3/FOSL1/CCNA2/TRPC6/FOXO1/COL1A1/PCNA/PDGFRA/AXL/FABP1/DPEP1/MT-ND6/CCR7/AQP1/DUSP1/GSTP1/AKR1C3/APOD/MT-ND5/MMP3/CYP1B1/KLF2/AREG/LCN2/SPHK1/TRPM2/BMP7	GO_BP
24	GO:1902105~regulation of leukocyte differentiation	76	76/2754	270/18012	4.00904e-08	5.52891e-06	1.84097	ENSG00000104267/ENSG00000164342/ENSG00000127951/ENSG00000137265/ENSG00000108773/ENSG00000160685/ENSG00000107738/ENSG00000067955/ENSG00000155846/ENSG00000239672/ENSG00000121807/ENSG00000139193/ENSG00000136997/ENSG00000104312/ENSG00000172724/ENSG00000152495/ENSG00000079385/ENSG00000134256/ENSG00000185862/ENSG00000010671/ENSG00000198846/ENSG00000122641/ENSG00000159216/ENSG00000187741/ENSG00000135426…	CA2/TLR3/FGL2/IRF4/KAT2A/ZBTB7B/VSIR/CBFB/PPARGC1B/NME1/CCR2/CD27/MYC/RIPK2/CCL19/CAMK4/CEACAM1/CD101/EVI2B/BTK/TOX/INHBA/RUNX1/FANCA/TESPA1/PCID2/FANCD2/RASSF2/ZC3H8/SMAD7/CYP26B1/GLI3/NCKAP1L/TAL1/SASH3/CEBPB/CSF1/CR1/KITLG/HCLS1/ZEB1/LIF/IL23A/MIR17HG/SPINK5/FCGR2B/AXL/IKZF3/LEF1/TESC/SHH/CD4/PTPRC/LAG3/LGALS9/LRRC17/MITF/DUSP10/IL18/C1QC/CD28/BMP4/HLA-DOA/SLC9B2/PIK3R6/TNFSF9/LILRB1/GATA2/DTX…	GO_BP
25	GO:0072503~cellular divalent inorganic cation homeostasis	120	120/2754	490/18012	4.91607e-08	6.5534e-06	1.60171	ENSG00000205364/ENSG00000145362/ENSG00000173175/ENSG00000205358/ENSG00000169860/ENSG00000124205/ENSG00000104154/ENSG00000198417/ENSG00000108405/ENSG00000135218/ENSG00000138193/ENSG00000198121/ENSG00000166501/ENSG00000107562/ENSG00000125648/ENSG00000167323/ENSG00000187193/ENSG00000176273/ENSG00000164850/ENSG00000198523/ENSG00000197943/ENSG00000149596/ENSG00000103888/ENSG00000196950/ENSG00000171791…	MT1M/ANK2/ADCY5/MT1H/P2RY1/EDN3/SLC30A4/MT1F/P2RX1/CD36/PLCE1/LPAR1/PRKCB/CXCL12/SLC25A23/STIM1/MT1X/SLC35G1/GPER1/PLN/PLCG2/JPH2/CEMIP/SLC39A10/BCL2/CALB2/CCL13/CCR2/MT1G/CYSLTR1/SYNPO/P2RX4/AKAP6/GSTM2/CCL15/P2RY8/GNA13/PIK3CG/PTGER4/CCL19/EDNRB/CACNB2/BDKRB1/SRI/MS4A1/CCL28/BDKRB2/MT2A/CMKLR1/CLIC2/PTK2B/GRIN2D/PDE4D/ITPR1/F2RL1/CDH23/MT1E/CAV1/FKBP1B/NMB/CCL21/OXTR/JPH1/DMD/ATP2B1/EPHX2/CACNA…	GO_BP
26	GO:0032103~positive regulation of response to external stimulus	85	85/2754	315/18012	5.30763e-08	6.86232e-06	1.76484	ENSG00000160712/ENSG00000105894/ENSG00000186642/ENSG00000124205/ENSG00000150593/ENSG00000198121/ENSG00000107562/ENSG00000164342/ENSG00000171951/ENSG00000105976/ENSG00000172349/ENSG00000170962/ENSG00000153162/ENSG00000121807/ENSG00000104312/ENSG00000135124/ENSG00000105851/ENSG00000171522/ENSG00000172724/ENSG00000196664/ENSG00000112715/ENSG00000145147/ENSG00000174600/ENSG00000120899/ENSG00000134061…	IL6R/PTN/PDE2A/EDN3/PDCD4/LPAR1/CXCL12/TLR3/SCG2/MET/IL16/PDGFD/BMP6/CCR2/RIPK2/P2RX4/PIK3CG/PTGER4/CCL19/TLR7/VEGFA/SLIT2/CMKLR1/PTK2B/CD180/BTK/IL6ST/CYP27B1/F2RL1/FKBP1B/CCL21/DDX60/ITGA2/TIAM1/FGF2/LRRK2/RIPOR2/S1PR1/NCKAP1L/CEBPB/CSF1/MAPK3/AIF1/LY86/IL23A/WISP1/THBS4/C2CD4A/CCL5/TUBB2B/TLR6/CXCL13/CAMK1D/LGALS9/RARRES2/LY96/IL18/TNFRSF11A/FGFR1/CD28/CXCL8/ZP3/CCR7/SERPINE1/FGF18/PTGER3/F12/…	GO_BP
27	GO:0070663~regulation of leukocyte proliferation	65	65/2754	221/18012	6.34867e-08	7.87996e-06	1.92362	ENSG00000160712/ENSG00000090659/ENSG00000171916/ENSG00000160685/ENSG00000158473/ENSG00000107738/ENSG00000196950/ENSG00000081189/ENSG00000171791/ENSG00000138735/ENSG00000121807/ENSG00000104312/ENSG00000172724/ENSG00000012124/ENSG00000114455/ENSG00000170476/ENSG00000010671/ENSG00000170298/ENSG00000134352/ENSG00000155659/ENSG00000105246/ENSG00000109743/ENSG00000123338/ENSG00000122122/ENSG00000172216…	IL6R/CD209/LGALS9C/ZBTB7B/CD1D/VSIR/SLC39A10/MEF2C/BCL2/PDE5A/CCR2/RIPK2/CCL19/CD22/HHLA2/MZB1/BTK/LGALS9B/IL6ST/VSIG4/EBI3/BST1/NCKAP1L/SASH3/CEBPB/CSF1/AIF1/KITLG/LGALS3/IL23A/SPN/GPR183/TNFRSF13C/CD3E/ATAD5/CD38/CCL5/FCGR2B/IKZF3/CDKN1A/SHH/CD4/PTPRC/LGALS9/IL18/HHEX/CD28/ZP3/ENPP3/GSTP1/PTPN22/BMP4/VCAM1/TNFSF9/LILRB1/HLA-DMB/MIF/ARG2/GPNMB/FOXP3/HLA-DPB1/HLA-DPA1/PDCD1LG2/VAV3/IL1B	GO_BP
28	GO:0050853~B cell receptor signaling pathway	26	26/2754	58/18012	8.12501e-08	9.16797e-06	2.93186	ENSG00000154822/ENSG00000102010/ENSG00000166501/ENSG00000197943/ENSG00000196950/ENSG00000105369/ENSG00000081189/ENSG00000067955/ENSG00000171791/ENSG00000007312/ENSG00000012124/ENSG00000156738/ENSG00000010671/ENSG00000159216/ENSG00000172578/ENSG00000123338/ENSG00000254709/ENSG00000171608/ENSG00000004468/ENSG00000072694/ENSG00000174500/ENSG00000081237/ENSG00000134242/ENSG00000113263/ENSG00000203896…	PLCL2/BMX/PRKCB/PLCG2/SLC39A10/CD79A/MEF2C/CBFB/BCL2/CD79B/CD22/MS4A1/BTK/RUNX1/KLHL6/NCKAP1L/IGLL5/PIK3CD/CD38/FCGR2B/GCSAM/PTPRC/PTPN22/ITK/LIME1/VAV3	GO_BP
29	GO:2000241~regulation of reproductive process	48	48/2754	146/18012	8.3205e-08	9.2209e-06	2.15024	ENSG00000169860/ENSG00000146469/ENSG00000183134/ENSG00000164442/ENSG00000071539/ENSG00000101224/ENSG00000125398/ENSG00000102265/ENSG00000138735/ENSG00000136160/ENSG00000172572/ENSG00000142875/ENSG00000181773/ENSG00000087586/ENSG00000145088/ENSG00000116455/ENSG00000122641/ENSG00000123131/ENSG00000186350/ENSG00000064102/ENSG00000180914/ENSG00000123612/ENSG00000181085/ENSG00000169083/ENSG00000163132…	P2RY1/VIP/PTGDR2/CITED2/TRIP13/CDC25B/SOX9/TIMP1/PDE5A/EDNRB/PDE3A/PRKACB/GPR3/AURKA/EAF2/WDR77/INHBA/PRDX4/RXRA/INTS13/OXTR/ACVR1C/MAPK15/AR/MSX1/CDC25C/CDC25A/ZFPM2/SNAI1/TTK/LIF/CDC20/ASPM/HYAL3/CACNA1H/MSX2/OVGP1/SHH/PHLDA2/ZP3/DUSP1/BMP4/SULF1/AMH/NPM2/WNT5A/INHBB/BMP7	GO_BP
30	GO:0035690~cellular response to drug	93	93/2754	360/18012	1.19937e-07	1.28332e-05	1.68958	ENSG00000173175/ENSG00000186642/ENSG00000169860/ENSG00000164342/ENSG00000158828/ENSG00000165457/ENSG00000088256/ENSG00000183010/ENSG00000096384/ENSG00000073417/ENSG00000145936/ENSG00000105976/ENSG00000136826/ENSG00000167641/ENSG00000125398/ENSG00000170962/ENSG00000113580/ENSG00000081189/ENSG00000116473/ENSG00000141570/ENSG00000239672/ENSG00000119138/ENSG00000136997/ENSG00000123374/ENSG00000135446…	ADCY5/PDE2A/P2RY1/TLR3/PINK1/FOLR2/GNA11/PYCR1/HSP90AB1/PDE8A/KCNMB1/MET/KLF4/PPP1R14A/SOX9/PDGFD/NR3C1/MEF2C/RAP1A/CBX8/NME1/KLF9/MYC/CDK2/CDK4/RIPK2/P2RX4/GSTM2/CHRNA3/TFAP4/GPR37L1/CAD/EZH2/TRAP1/PPAT/HMOX1/ECT2/PPARGC1A/GNAI1/FBXO32/SLIT2/MT2A/PCK1/TIMELESS/CDK1/TP53INP1/MAP4K1/PRKN/SIGMAR1/EFNA5/BRCA1/ATP2B4/SMPD3/SLC8A1/GNAQ/AOC1/LRRK2/MSX1/EIF4EBP1/MAPK3/AIF1/CCNA2/TRPC6/DDX11/P2RY2/CD69/F…	GO_BP
31	GO:0071466~cellular response to xenobiotic stimulus	55	55/2754	179/18012	1.31221e-07	1.38027e-05	2.00959	ENSG00000197165/ENSG00000242515/ENSG00000186642/ENSG00000095303/ENSG00000196502/ENSG00000096384/ENSG00000112964/ENSG00000113580/ENSG00000171428/ENSG00000213366/ENSG00000090447/ENSG00000196620/ENSG00000131471/ENSG00000109819/ENSG00000173597/ENSG00000166508/ENSG00000156804/ENSG00000156006/ENSG00000124253/ENSG00000101412/ENSG00000172831/ENSG00000108242/ENSG00000172828/ENSG00000117791/ENSG00000120915…	SULT1A2/UGT1A10/PDE2A/PTGS1/SULT1A1/HSP90AB1/GHR/NR3C1/NAT1/GSTM2/TFAP4/UGT2B15/AOC3/PPARGC1A/SULT1B1/MCM7/FBXO32/NAT2/PCK1/E2F1/CES2/CYP2C18/CES3/MARC2/EPHX2/SLC8A1/AOC1/CYP26B1/EIF4EBP1/AIF1/CCNA2/NQO2/FOXO1/PCNA/GSTM4/CMBL/CYP2S1/DNMT3B/DDIT4/CYP2D7/RORA/CES1/DPEP1/AKR1C1/AQP1/GSTP1/ARNT2/CYP1B1/AKR7A3/RORC/GSTM1/ABCC2/GSTM3/PHGDH/CYP2W1	GO_BP
32	GO:0070371~ERK1 and ERK2 cascade	82	82/2754	308/18012	1.69528e-07	1.75348e-05	1.74125	ENSG00000111846/ENSG00000169860/ENSG00000135218/ENSG00000048540/ENSG00000122694/ENSG00000073417/ENSG00000164850/ENSG00000136826/ENSG00000125398/ENSG00000170962/ENSG00000092421/ENSG00000116473/ENSG00000183856/ENSG00000181374/ENSG00000157404/ENSG00000066468/ENSG00000136997/ENSG00000104312/ENSG00000125845/ENSG00000275718/ENSG00000171522/ENSG00000172724/ENSG00000183578/ENSG00000079385/ENSG00000137486…	GCNT2/P2RY1/CD36/LMO3/GLIPR2/PDE8A/GPER1/KLF4/SOX9/PDGFD/SEMA6A/RAP1A/IQGAP3/CCL13/KIT/FGFR2/MYC/RIPK2/BMP2/CCL15/PTGER4/CCL19/TNFAIP8L3/CEACAM1/ARRB1/NDRG2/CD44/TEK/PTK2B/GAREM1/F2RL1/PTPRR/CCL21/OXTR/NOX4/TIAM1/FGF2/NDRG4/SLAMF1/MAPK3/SCIMP/CAMK2N1/RPS6KA6/LIF/CCL11/NQO2/ALKAL1/ANGPT1/FBLN1/CSF1R/SLC9A3R1/AKAP12/GPR183/CCL5/PDGFRA/CD4/CHI3L1/PTPRC/LGALS9/DUSP10/TNFRSF11A/CCR7/DUSP1/FFAR4/GSTP1/…	GO_BP
33	GO:2000106~regulation of leukocyte apoptotic process	32	32/2754	83/18012	2.06983e-07	1.98186e-05	2.52156	ENSG00000107562/ENSG00000171115/ENSG00000196950/ENSG00000081189/ENSG00000139193/ENSG00000172724/ENSG00000010671/ENSG00000137077/ENSG00000144161/ENSG00000151012/ENSG00000049130/ENSG00000180353/ENSG00000131981/ENSG00000171608/ENSG00000215417/ENSG00000178999/ENSG00000271503/ENSG00000157514/ENSG00000167601/ENSG00000160654/ENSG00000168961/ENSG00000107099/ENSG00000126353/ENSG00000089041/ENSG00000125378…	CXCL12/GIMAP8/SLC39A10/MEF2C/CD27/CCL19/BTK/CCL21/ZC3H8/SLC7A11/KITLG/HCLS1/LGALS3/PIK3CD/MIR17HG/AURKB/CCL5/TSC22D3/AXL/CD3G/LGALS9/DOCK8/CCR7/P2RX7/BMP4/LILRB1/MIF/ARG2/CCR5/CDKN2A/NOD2/WNT5A	GO_BP
34	GO:0018108~peptidyl-tyrosine phosphorylation	92	92/2754	359/18012	2.07672e-07	1.98186e-05	1.67607	ENSG00000160712/ENSG00000135218/ENSG00000070759/ENSG00000102010/ENSG00000060140/ENSG00000157193/ENSG00000105976/ENSG00000112964/ENSG00000170962/ENSG00000153162/ENSG00000157404/ENSG00000066468/ENSG00000104312/ENSG00000159733/ENSG00000146918/ENSG00000127334/ENSG00000026508/ENSG00000120156/ENSG00000112715/ENSG00000196411/ENSG00000120899/ENSG00000165304/ENSG00000010671/ENSG00000134352/ENSG00000105974…	IL6R/CD36/TESK2/BMX/STYK1/LRP8/MET/GHR/PDGFD/BMP6/KIT/FGFR2/RIPK2/ZFYVE28/NCAPG2/DYRK2/CD44/TEK/VEGFA/EPHB4/PTK2B/MELK/BTK/IL6ST/CAV1/LTK/NEURL1/EPHA10/ENPP2/DDR2/ADRA2A/NOX4/NRG1/EFNA5/NCF1/ROR1/BST1/TAL1/MATK/MAPK3/KITLG/HCLS1/TTK/IL11/MAP2K6/LIF/IL23A/ALKAL1/EFEMP1/ANGPT1/CSF1R/THBS4/STAP2/CD3E/NTRK2/CCL5/TGFA/ITGB3/PDGFRA/AXL/RET/HCK/FGF7/NEDD9/EPHA4/TYRO3/CD4/SAMSN1/PTPRC/BANK1/IL18/FGFR1/EP…	GO_BP
35	GO:0055074~calcium ion homeostasis	113	113/2754	469/18012	2.95169e-07	2.54419e-05	1.57581	ENSG00000145362/ENSG00000173175/ENSG00000169860/ENSG00000124205/ENSG00000108405/ENSG00000135218/ENSG00000138193/ENSG00000198121/ENSG00000166501/ENSG00000107562/ENSG00000125648/ENSG00000167323/ENSG00000176273/ENSG00000164850/ENSG00000198523/ENSG00000197943/ENSG00000149596/ENSG00000103888/ENSG00000171791/ENSG00000172137/ENSG00000181374/ENSG00000121807/ENSG00000173198/ENSG00000171992/ENSG00000135124…	ANK2/ADCY5/P2RY1/EDN3/P2RX1/CD36/PLCE1/LPAR1/PRKCB/CXCL12/SLC25A23/STIM1/SLC35G1/GPER1/PLN/PLCG2/JPH2/CEMIP/BCL2/CALB2/CCL13/CCR2/CYSLTR1/SYNPO/P2RX4/AKAP6/GSTM2/CCL15/P2RY8/GNA13/PIK3CG/PTGER4/CCL19/EDNRB/CACNB2/BDKRB1/SRI/MS4A1/CCL28/BDKRB2/CMKLR1/CLIC2/PTK2B/GRIN2D/PDE4D/CYP27B1/ITPR1/F2RL1/CDH23/CAV1/FKBP1B/NMB/CCL21/OXTR/JPH1/DMD/ATP2B1/EPHX2/CACNA2D1/CAMK2D/VDR/ATP2B4/TRPA1/FGF2/SLC8A1/GRIN…	GO_BP
36	GO:1901654~response to ketone	57	57/2754	193/18012	3.44983e-07	2.85462e-05	1.93159	ENSG00000105894/ENSG00000173175/ENSG00000186469/ENSG00000184347/ENSG00000198523/ENSG00000110092/ENSG00000136826/ENSG00000163347/ENSG00000113580/ENSG00000239672/ENSG00000151632/ENSG00000119138/ENSG00000135446/ENSG00000069535/ENSG00000128573/ENSG00000090447/ENSG00000084774/ENSG00000171522/ENSG00000172724/ENSG00000127955/ENSG00000156804/ENSG00000145147/ENSG00000124253/ENSG00000105974/ENSG00000137077…	PTN/ADCY5/GNG2/SLIT3/PLN/CCND1/KLF4/CLDN1/NR3C1/NME1/AKR1C2/KLF9/CDK4/MAOB/FOXP2/TFAP4/CAD/PTGER4/CCL19/GNAI1/FBXO32/SLIT2/PCK1/CAV1/CCL21/OXTR/MAP4K1/ATP2B1/TXNIP/EFNA5/AR/PSPH/CATSPERG/EIF4EBP1/FOSL1/FOXO1/PCNA/CD38/DNMT3B/PTGER2/DDIT4/PTGFR/CDKN1A/TGFBR3/CCR7/AQP1/DUSP1/AKR1C3/KLF2/AKR1B1/KCNJ11/CA9/CYBB/SPP1/ABCC2/FOSB/HOXB13	GO_BP
37	GO:0002237~response to molecule of bacterial origin	87	87/2754	338/18012	3.59637e-07	2.89858e-05	1.68345	ENSG00000150593/ENSG00000135218/ENSG00000114698/ENSG00000164120/ENSG00000197943/ENSG00000163347/ENSG00000153162/ENSG00000081189/ENSG00000066468/ENSG00000189067/ENSG00000135446/ENSG00000104312/ENSG00000069535/ENSG00000171522/ENSG00000136160/ENSG00000100739/ENSG00000109819/ENSG00000124253/ENSG00000134061/ENSG00000113448/ENSG00000111012/ENSG00000172380/ENSG00000163251/ENSG00000110324/ENSG00000162909…	PDCD4/CD36/PLSCR4/HPGD/PLCG2/CLDN1/BMP6/MEF2C/FGFR2/LITAF/CDK4/RIPK2/MAOB/PTGER4/EDNRB/BDKRB1/PPARGC1A/PCK1/CD180/PDE4D/CYP27B1/GNG12/FZD5/IL10RA/CAPN2/CD96/CSF2RB/PPARD/MRC1/CEBPB/MAPK3/LY86/CXCL1/TLR1/ERBIN/AKAP12/DCN/LDOC1/CCL5/FCGR2B/CXCL3/AXL/ABCA1/PTGER2/HCK/B2M/PTGFR/TLR6/SSC5D/GFI1/CXCL13/LGALS9/DUSP10/LY96/IL18/TNFRSF11A/CD14/CXCL8/CCR7/P2RX7/GSTP1/PTPN22/SERPINE1/IRAK2/SELP/VCAM1/SLC11A…	GO_BP
38	GO:0042445~hormone metabolic process	65	65/2754	232/18012	4.50491e-07	3.49468e-05	1.83241	ENSG00000196616/ENSG00000135437/ENSG00000099139/ENSG00000042445/ENSG00000086696/ENSG00000073737/ENSG00000278535/ENSG00000196502/ENSG00000248144/ENSG00000112964/ENSG00000198074/ENSG00000153162/ENSG00000112175/ENSG00000176928/ENSG00000151632/ENSG00000125845/ENSG00000176387/ENSG00000198189/ENSG00000109819/ENSG00000173597/ENSG00000163751/ENSG00000160613/ENSG00000111012/ENSG00000167755/ENSG00000108242…	ADH1B/RDH5/PCSK5/RETSAT/HSD17B2/DHRS9/DHRS11/SULT1A1/ADH1C/GHR/AKR1B10/BMP6/BMP5/GCNT4/AKR1C2/BMP2/HSD11B2/HSD17B11/PPARGC1A/SULT1B1/CPA3/PCSK7/CYP27B1/KLK6/CYP2C18/CLCN2/DHCR7/ECE1/CPQ/VDR/PCSK6/DGAT2/ADH6/CYP26B1/SLC44A4/DHRS2/ECE2/HSD17B6/CACNA1H/ACHE/CYP2S1/CORIN/PDGFRA/STC2/BACE2/TG/SHH/CES1/GFI1/AKR1C1/FGFR1/SERPINA6/AKR1C3/CYP27A1/ALDH1A1/CYP1B1/AKR1B1/DIO2/SPP1/CPE/UGT2B7/FOXA1/MME/DDO/IL…	GO_BP
39	GO:0015711~organic anion transport	114	114/2754	481/18012	6.35351e-07	4.6383e-05	1.55009	ENSG00000186198/ENSG00000163959/ENSG00000139433/ENSG00000080493/ENSG00000167434/ENSG00000123643/ENSG00000146039/ENSG00000135218/ENSG00000157184/ENSG00000178537/ENSG00000103257/ENSG00000170482/ENSG00000104267/ENSG00000165457/ENSG00000125648/ENSG00000076555/ENSG00000155850/ENSG00000244734/ENSG00000181035/ENSG00000101187/ENSG00000174640/ENSG00000131389/ENSG00000081923/ENSG00000220205/ENSG00000135124…	SLC51B/SLC51A/GLTP/SLC4A4/CA4/SLC36A1/SLC17A4/CD36/CPT2/SLC25A20/SLC7A5/SLC23A1/CA2/FOLR2/SLC25A23/ACACB/SLC26A2/HBB/SLC25A42/SLCO4A1/SLCO2A1/SLC6A6/ATP8B1/VAMP2/P2RX4/ATP11A/CPT1A/MPC1/SLC35D1/TNFAIP8L3/CEACAM1/APBA1/CROT/SLC16A9/SLC6A9/ABCD3/SLC13A2/SCP2/BDKRB2/TMEM30B/SLC38A4/SLC3A2/PRELID3A/SLC1A1/SLC5A6/NMB/RXRA/PLA2G10/SLC26A3/PLEKHA8P1/HBA2/ATP8B4/PQLC1/RGS2/ATP8A1/CA12/PPARD/CPTP/STX1A/ST…	GO_BP
40	GO:0002683~negative regulation of immune system process	109	109/2754	455/18012	6.42754e-07	4.6383e-05	1.5668	ENSG00000154822/ENSG00000271447/ENSG00000107562/ENSG00000171916/ENSG00000111863/ENSG00000164342/ENSG00000127951/ENSG00000137265/ENSG00000164850/ENSG00000160685/ENSG00000125398/ENSG00000107738/ENSG00000112175/ENSG00000067955/ENSG00000076641/ENSG00000239672/ENSG00000101782/ENSG00000138735/ENSG00000121807/ENSG00000136997/ENSG00000117115/ENSG00000146918/ENSG00000106299/ENSG00000171522/ENSG00000012124…	PLCL2/MMP28/CXCL12/LGALS9C/ADTRP/TLR3/FGL2/IRF4/GPER1/ZBTB7B/SOX9/VSIR/BMP5/CBFB/PAG1/NME1/RIOK3/PDE5A/CCR2/MYC/PADI2/NCAPG2/WASL/PTGER4/CD22/HMOX1/MEIS1/CEACAM1/CCL28/SLIT2/RNF125/PTK2B/BTK/LGALS9B/INHBA/LGR4/F2RL1/RUNX1/CCL21/SOCS6/GRAMD4/CD96/VSIG4/ZC3H8/SMAD7/FOXF1/RIPOR2/GLI3/LAX1/A2M/TAL1/CEBPB/CR1/KITLG/PRMT1/MEIS2/LGALS3/PRKDC/ANGPT1/TNFAIP8L2/SPN/SPINK5/ERBIN/FCGR2B/TSC22D3/AXL/GCSAM/SLA…	GO_BP
41	GO:0003018~vascular process in circulatory system	51	51/2754	170/18012	8.32563e-07	5.6779e-05	1.96209	ENSG00000100604/ENSG00000186642/ENSG00000169860/ENSG00000146469/ENSG00000124205/ENSG00000108405/ENSG00000156113/ENSG00000075073/ENSG00000145936/ENSG00000164850/ENSG00000244734/ENSG00000153162/ENSG00000169418/ENSG00000165895/ENSG00000136160/ENSG00000100292/ENSG00000172572/ENSG00000079385/ENSG00000168398/ENSG00000120156/ENSG00000112715/ENSG00000145147/ENSG00000164251/ENSG00000105974/ENSG00000171388…	CHGA/PDE2A/P2RY1/VIP/EDN3/P2RX1/KCNMA1/TACR2/KCNMB1/GPER1/HBB/BMP6/NPR1/ARHGAP42/EDNRB/HMOX1/PDE3A/CEACAM1/BDKRB2/TEK/VEGFA/SLIT2/F2RL1/CAV1/APLN/OXTR/ADRA2A/ECE1/ATP2B1/EPHX2/RGS2/PRKG1/SLC8A1/PPARD/HTR1D/PLOD3/P2RY2/ANGPT1/AKAP12/C2CD4A/CD38/PTP4A3/TRPM4/COMP/ACTA2/EDNRA/AGT/GUCY1A3/TRPV4/SERPINF2/C2CD4B	GO_BP
42	GO:0032970~regulation of actin filament-based process	94	94/2754	380/18012	8.53134e-07	5.75494e-05	1.61786	ENSG00000168309/ENSG00000145362/ENSG00000046653/ENSG00000198121/ENSG00000088280/ENSG00000107562/ENSG00000006747/ENSG00000109265/ENSG00000198523/ENSG00000163431/ENSG00000105976/ENSG00000006740/ENSG00000165410/ENSG00000081189/ENSG00000172403/ENSG00000064666/ENSG00000172661/ENSG00000171992/ENSG00000106299/ENSG00000171522/ENSG00000116574/ENSG00000075142/ENSG00000114346/ENSG00000173898/ENSG00000242498…	FAM107A/ANK2/GPM6B/LPAR1/ASAP3/CXCL12/SCIN/KIAA1211/PLN/LMOD1/MET/ARHGAP44/CFL2/MEF2C/SYNPO2/CNN2/WASHC2C/SYNPO/WASL/PTGER4/RHOU/SRI/ECT2/SPTBN2/ARPIN/SLC9A1/RHOF/TEK/SLIT2/DIXDC1/GSN/PTK2B/ILK/DSC2/AKAP9/PDE4D/JAM3/F2RL1/ACTR3B/CAV1/CCL21/LIMA1/PRKN/NOX4/CELSR1/EFNA5/CAMK2D/IQGAP2/BST1/SH3BP1/GRHL3/VILL/S1PR1/NCKAP1L/ARHGAP28/WAS/TPM1/HCLS1/TMOD2/CCL11/GMFG/CSF1R/CDC42EP3/PLEKHH2/FGF13/RHOJ/RHOH…	GO_BP
43	GO:1902850~microtubule cytoskeleton organization involved in mitosis	42	42/2754	130/18012	8.87588e-07	5.85997e-05	2.11302	ENSG00000088325/ENSG00000066629/ENSG00000186193/ENSG00000132341/ENSG00000127955/ENSG00000089685/ENSG00000101057/ENSG00000087586/ENSG00000134057/ENSG00000101146/ENSG00000117650/ENSG00000137807/ENSG00000161800/ENSG00000090889/ENSG00000119541/ENSG00000166851/ENSG00000075702/ENSG00000115163/ENSG00000237649/ENSG00000164109/ENSG00000198901/ENSG00000064102/ENSG00000143228/ENSG00000100242/ENSG00000134222…	TPX2/EML1/SAPCD2/RAN/GNAI1/BIRC5/MYBL2/AURKA/CCNB1/RAE1/NEK2/KIF23/RACGAP1/KIF4A/VPS4B/PLK1/WDR62/CENPA/KIFC1/MAD2L1/PRC1/INTS13/NUF2/SUN2/PSRC1/SPC25/TACC3/RCC1/SPDL1/STIL/TTK/ESPL1/NUSAP1/CDC20/AURKB/MZT1/GPSM2/MISP/CENPE/FLNA/HSPA1A/MAP9	GO_BP
44	GO:0090066~regulation of anatomical structure size	117	117/2754	500/18012	9.02242e-07	5.89401e-05	1.53043	ENSG00000100604/ENSG00000137872/ENSG00000169860/ENSG00000065320/ENSG00000146469/ENSG00000124205/ENSG00000108405/ENSG00000107562/ENSG00000166821/ENSG00000010319/ENSG00000006747/ENSG00000156113/ENSG00000109265/ENSG00000096384/ENSG00000145936/ENSG00000164850/ENSG00000163431/ENSG00000006327/ENSG00000167705/ENSG00000244734/ENSG00000130558/ENSG00000165410/ENSG00000092421/ENSG00000183856/ENSG00000169418…	CHGA/SEMA6D/P2RY1/NTN1/VIP/EDN3/P2RX1/CXCL12/PEX11A/SEMA3G/SCIN/KCNMA1/KIAA1211/HSP90AB1/KCNMB1/GPER1/LMOD1/TNFRSF12A/RILP/HBB/OLFM1/CFL2/SEMA6A/IQGAP3/NPR1/WASHC2C/CDK4/WASL/ARHGAP42/EDNRB/HMOX1/SLC12A8/SPTBN2/ARPIN/L1CAM/BDKRB2/VEGFA/SLIT2/GSN/PTK2B/ILK/PLS1/CDHR5/F2RL1/ACTR3B/CAV1/APLN/WNT3/CCL21/LIMA1/SPART/OXTR/ADRA2A/ECE1/ATP2B1/EPHX2/EFNA5/RGS2/PRKG1/SLC8A1/PPARD/IQGAP2/CDHR2/LRRK2/SH3BP1/…	GO_BP
45	GO:0007411~axon guidance	73	73/2754	276/18012	1.0332e-06	6.61038e-05	1.72986	ENSG00000137872/ENSG00000182168/ENSG00000144619/ENSG00000149294/ENSG00000065320/ENSG00000151892/ENSG00000134121/ENSG00000101680/ENSG00000107562/ENSG00000184347/ENSG00000010319/ENSG00000109458/ENSG00000130449/ENSG00000092421/ENSG00000100784/ENSG00000173898/ENSG00000085552/ENSG00000198910/ENSG00000112715/ENSG00000145147/ENSG00000196411/ENSG00000114554/ENSG00000149557/ENSG00000183317/ENSG00000108379…	SEMA6D/UNC5C/CNTN4/NCAM1/NTN1/GFRA1/CHL1/LAMA1/CXCL12/SLIT3/SEMA3G/GAB1/ZSWIM6/SEMA6A/RPS6KA5/SPTBN2/IGSF9/L1CAM/VEGFA/SLIT2/EPHB4/PLXNA1/FEZ1/EPHA10/WNT3/PLA2G10/SCN1B/NFASC/PLXNA2/EFNA5/ZSWIM4/MATN2/NEXN/NTN4/BOC/GLI3/MAPK3/SEMA4G/NEO1/ATOH1/FLRT2/PIK3CD/GRB7/CSF1R/VLDLR/DOK2/CELSR3/RET/TUBB2B/EPHA4/LAMA2/SPTBN5/SHH/EVL/PALLD/UNC5B/ANOS1/EPHB3/EFNA3/EPHA3/EPHB6/SEMA3B/FZD3/TUBB3/EFNA2/WNT5A/FLR…	GO_BP
46	GO:0010038~response to metal ion	90	90/2754	363/18012	1.30691e-06	7.95162e-05	1.62156	ENSG00000205364/ENSG00000205358/ENSG00000104154/ENSG00000198417/ENSG00000139117/ENSG00000124772/ENSG00000151150/ENSG00000104267/ENSG00000125648/ENSG00000167323/ENSG00000187193/ENSG00000156113/ENSG00000145936/ENSG00000198523/ENSG00000110092/ENSG00000163347/ENSG00000166869/ENSG00000153162/ENSG00000081189/ENSG00000171791/ENSG00000157404/ENSG00000125144/ENSG00000049759/ENSG00000135446/ENSG00000135124…	MT1M/MT1H/SLC30A4/MT1F/CPNE8/CPNE5/ANK3/CA2/SLC25A23/STIM1/MT1X/KCNMA1/KCNMB1/PLN/CCND1/CLDN1/CHP2/BMP6/MEF2C/BCL2/KIT/MT1G/NEDD4L/CDK4/P2RX4/MAOB/HMOX1/ECT2/RASGRP2/PPARGC1A/CCNB1/MT2A/HVCN1/GSN/PTK2B/APBB1/SORD/MT1E/CYBRD1/CAV1/CDK1/PRKN/PDX1/HOMER1/TXNIP/DTYMK/CAMK2D/NCF1/SMPD3/AOC1/CPNE7/LRRK2/MAPK3/NUDT1/CPNE1/PCNA/CACNA1H/SYT11/C1QA/LOXL2/B2M/NDRG1/TFR2/SHH/DPEP1/CD14/TRPC1/P2RX7/AQP1/DUSP1…	GO_BP
47	GO:0061138~morphogenesis of a branching epithelium	53	53/2754	182/18012	1.4121e-06	8.50824e-05	1.90459	ENSG00000118526/ENSG00000101680/ENSG00000105989/ENSG00000105976/ENSG00000125398/ENSG00000164161/ENSG00000171791/ENSG00000134245/ENSG00000066468/ENSG00000136997/ENSG00000125845/ENSG00000120063/ENSG00000112715/ENSG00000145147/ENSG00000114554/ENSG00000166333/ENSG00000205213/ENSG00000111602/ENSG00000186350/ENSG00000163251/ENSG00000075275/ENSG00000111424/ENSG00000138685/ENSG00000103241/ENSG00000169083…	TCF21/LAMA1/WNT2/MET/SOX9/HHIP/BCL2/WNT2B/FGFR2/MYC/BMP2/GNA13/VEGFA/SLIT2/PLXNA1/ILK/LGR4/TIMELESS/RXRA/FZD5/CELSR1/VDR/FGF2/FOXF1/AR/PBX1/NTN4/GLI3/RSPO3/CSF1/CCL11/MSX2/FGF7/COL4A1/LEF1/SHH/FGFR1/SALL1/BMP4/SFRP2/FAT4/EDNRA/AGT/PROX1/AREG/SULF1/TACSTD2/PGF/HOXA5/WNT5A/FOXA1/BMP7/HOXB13	GO_BP
48	GO:0051983~regulation of chromosome segregation	35	35/2754	102/18012	1.48403e-06	8.85566e-05	2.24422	ENSG00000071539/ENSG00000146670/ENSG00000169679/ENSG00000142945/ENSG00000114346/ENSG00000134057/ENSG00000117650/ENSG00000161800/ENSG00000166851/ENSG00000094804/ENSG00000164109/ENSG00000126226/ENSG00000164611/ENSG00000181085/ENSG00000013810/ENSG00000117724/ENSG00000116670/ENSG00000040275/ENSG00000156970/ENSG00000134982/ENSG00000102030/ENSG00000076382/ENSG00000128944/ENSG00000112742/ENSG00000013573…	TRIP13/CDCA5/BUB1/KIF2C/ECT2/CCNB1/NEK2/RACGAP1/PLK1/CDC6/MAD2L1/PCID2/PTTG1/MAPK15/TACC3/CENPF/MAD2L2/SPDL1/BUB1B/APC/NAA10/SPAG5/KNSTRN/TTK/DDX11/CDT1/ESPL1/CDC20/AURKB/DLGAP5/CENPE/AXIN2/MKI67/DUSP1/HECW2	GO_BP
49	GO:0045787~positive regulation of cell cycle	94	94/2754	385/18012	1.5698e-06	9.27825e-05	1.59685	ENSG00000036672/ENSG00000079335/ENSG00000124205/ENSG00000164442/ENSG00000163249/ENSG00000101224/ENSG00000096384/ENSG00000169372/ENSG00000164850/ENSG00000110092/ENSG00000175063/ENSG00000066468/ENSG00000123374/ENSG00000135446/ENSG00000124766/ENSG00000146670/ENSG00000090447/ENSG00000106462/ENSG00000114346/ENSG00000153094/ENSG00000087586/ENSG00000134057/ENSG00000185862/ENSG00000099901/ENSG00000137807…	USP2/CDC14A/EDN3/CITED2/CCNYL1/CDC25B/HSP90AB1/CRADD/GPER1/CCND1/UBE2C/FGFR2/CDK2/CDK4/SOX4/CDCA5/TFAP4/EZH2/ECT2/BCL2L11/AURKA/CCNB1/EVI2B/RANBP1/KIF23/HSPA2/RACGAP1/E2F1/CKS2/VPS4B/GTSE1/SVIL/CDC6/MAD2L1/CHEK1/ADAMTS1/BRCA2/CDK1/E2F7/MTBP/PCID2/KIF14/PSRC1/CDC45/MAPK15/BRCA1/SMPD3/DBF4B/DTL/PBX1/MSX1/EIF4EBP1/TAL1/AIF1/CDC25C/CDC25A/FOSL1/PRMT1/SPAG5/DBF4/CCNE1/MEIS2/DDX11/CDT1/ASNS/ESPL1/NUSAP…	GO_BP
50	GO:0016485~protein processing	70	70/2754	266/18012	2.07803e-06	0.000115145	1.72113	ENSG00000163815/ENSG00000112936/ENSG00000099139/ENSG00000135678/ENSG00000107738/ENSG00000126759/ENSG00000104312/ENSG00000115590/ENSG00000117322/ENSG00000142875/ENSG00000163751/ENSG00000148180/ENSG00000160613/ENSG00000116209/ENSG00000120885/ENSG00000121898/ENSG00000101294/ENSG00000167755/ENSG00000162909/ENSG00000184012/ENSG00000117298/ENSG00000155659/ENSG00000140479/ENSG00000112378/ENSG00000163131…	CLEC3B/C7/PCSK5/CPM/VSIR/CFP/RIPK2/IL1R2/CR2/PRKACB/CPA3/GSN/PCSK7/TMEM59/CLU/CPXM2/HM13/KLK6/CAPN2/TMPRSS2/ECE1/VSIG4/PCSK6/PERP/CTSS/LRRK2/GLI3/A2M/CFH/PLAU/C8G/BCL2L12/CR1/ECE2/PCSK9/SPON1/CORIN/C1QA/PRSS12/NKD2/BACE2/LDLRAD3/SHH/CES1/C1QC/COMP/P2RX7/SERPINE1/C1QB/C2/CPXM1/CHAC1/KLK1/PLAT/DYNC2H1/MELTF/ADAMTS2/F12/C3AR1/BIRC3/SERPINE2/CFB/CPE/SRGN/MME/GAS1/SERPINF2/C3/CTSE/IL1B	GO_BP
51	GO:0098656~anion transmembrane transport	74	74/2754	286/18012	2.13016e-06	0.000116989	1.69225	ENSG00000142959/ENSG00000080493/ENSG00000016602/ENSG00000123643/ENSG00000181804/ENSG00000157184/ENSG00000178537/ENSG00000103257/ENSG00000170482/ENSG00000165457/ENSG00000076555/ENSG00000155850/ENSG00000181035/ENSG00000065600/ENSG00000131389/ENSG00000112782/ENSG00000187730/ENSG00000110090/ENSG00000060762/ENSG00000116704/ENSG00000066230/ENSG00000221955/ENSG00000144136/ENSG00000090020/ENSG00000115616…	BEST4/SLC4A4/CLCA4/SLC36A1/SLC9A9/CPT2/SLC25A20/SLC7A5/SLC23A1/FOLR2/ACACB/SLC26A2/SLC25A42/TMEM206/SLC6A6/CLIC5/GABRD/CPT1A/MPC1/SLC35D1/SLC9A3/SLC12A8/SLC20A1/SLC9A1/SLC9A2/SLC6A9/CLIC2/SLC38A4/SLC3A2/SLC1A1/TTYH3/SLC5A6/SLC26A3/CLCN2/RGS2/STRA6/SLC37A2/SLC44A4/SLC16A7/SLC25A32/SLC7A1/SLC7A11/SLC7A6/SLC1A5/CLCA1/SLC12A2/SLC4A11/TTYH2/ADAMTS8/SLC46A1/ABCB1/ABCA1/SLC25A29/FXYD3/SLC3A1/SLC7A2/CLIC…	GO_BP
52	GO:0070482~response to oxygen levels	94	94/2754	389/18012	2.51876e-06	0.000134754	1.58043	ENSG00000105894/ENSG00000164442/ENSG00000198121/ENSG00000129474/ENSG00000141052/ENSG00000107562/ENSG00000158828/ENSG00000156113/ENSG00000145936/ENSG00000181061/ENSG00000181856/ENSG00000171791/ENSG00000198125/ENSG00000160307/ENSG00000109846/ENSG00000136997/ENSG00000135446/ENSG00000187583/ENSG00000125845/ENSG00000176387/ENSG00000100292/ENSG00000124440/ENSG00000167315/ENSG00000109819/ENSG00000090020…	PTN/CITED2/LPAR1/AJUBA/MYOCD/CXCL12/PINK1/KCNMA1/KCNMB1/HIGD1A/SLC2A4/BCL2/MB/S100B/CRYAB/MYC/CDK4/PLEKHN1/BMP2/HSD11B2/HMOX1/HIF3A/ACAA2/PPARGC1A/SLC9A1/HILPDA/CCNB1/EPAS1/TEK/VEGFA/PCK1/PTK2B/FAM162A/E2F1/ACVRL1/CPEB2/AHCY/ITPR1/CAV1/OXTR/SUV39H2/CAPN2/FAS/NOX4/PMAIP1/ITGA2/SLC8A1/PTGIS/PPARD/PSMA7/EIF4EBP1/PLAU/CCNA2/TRPC6/HK2/SUV39H1/FOXO1/NDNF/CLCA1/COL1A1/CBFA2T3/CD38/CYGB/LOXL2/DNMT3B/STC1…	GO_BP
53	GO:0002673~regulation of acute inflammatory response	33	33/2754	96/18012	2.80076e-06	0.000146063	2.24823	ENSG00000112936/ENSG00000163687/ENSG00000126759/ENSG00000105851/ENSG00000136160/ENSG00000117322/ENSG00000010671/ENSG00000134352/ENSG00000120885/ENSG00000155659/ENSG00000175899/ENSG00000000971/ENSG00000176919/ENSG00000203710/ENSG00000198535/ENSG00000072694/ENSG00000173372/ENSG00000141655/ENSG00000159189/ENSG00000188372/ENSG00000126353/ENSG00000084207/ENSG00000173369/ENSG00000166278/ENSG00000050628…	C7/DNASE1L3/CFP/PIK3CG/EDNRB/CR2/BTK/IL6ST/CLU/VSIG4/A2M/CFH/C8G/CR1/C2CD4A/FCGR2B/C1QA/TNFRSF11A/C1QC/ZP3/CCR7/GSTP1/C1QB/C2/PTGER3/F12/C3AR1/CFB/OSM/TNFSF11/C3/C2CD4B/IL1B	GO_BP
54	GO:0009612~response to mechanical stimulus	58	58/2754	210/18012	3.01215e-06	0.000153225	1.80637	ENSG00000105894/ENSG00000186642/ENSG00000169860/ENSG00000107562/ENSG00000164342/ENSG00000169372/ENSG00000125398/ENSG00000153162/ENSG00000157404/ENSG00000137757/ENSG00000064666/ENSG00000128573/ENSG00000171522/ENSG00000100739/ENSG00000196664/ENSG00000090020/ENSG00000134057/ENSG00000120899/ENSG00000149554/ENSG00000198947/ENSG00000120256/ENSG00000026103/ENSG00000265972/ENSG00000164171/ENSG00000120889…	PTN/PDE2A/P2RY1/CXCL12/TLR3/CRADD/SOX9/BMP6/KIT/CASP5/CNN2/FOXP2/PTGER4/BDKRB1/TLR7/SLC9A1/CCNB1/PTK2B/CHEK1/DMD/LRP11/FAS/TXNIP/ITGA2/TNFRSF10B/TRPA1/SLC8A1/RIPOR2/PSPH/MAP1B/STRA6/MAPK3/FOSL1/MEIS2/ASNS/COL1A1/COL11A1/DCN/PDZD7/MMP7/SLITRK6/ANGPT2/SLC2A1/CHI3L1/P2RX7/TLR8/AQP1/TLR5/NRXN2/AGT/PIEZO2/SERPINE2/TNFSF14/TRPV4/SCX/FOSB/CXCL10/IL1B	GO_BP
55	GO:0006979~response to oxidative stress	103	103/2754	438/18012	3.16764e-06	0.00015791	1.53802	ENSG00000171503/ENSG00000087258/ENSG00000135218/ENSG00000117592/ENSG00000095303/ENSG00000158828/ENSG00000183010/ENSG00000073417/ENSG00000105976/ENSG00000136826/ENSG00000211445/ENSG00000244734/ENSG00000170962/ENSG00000171791/ENSG00000155846/ENSG00000198125/ENSG00000141570/ENSG00000109846/ENSG00000130766/ENSG00000250722/ENSG00000123374/ENSG00000170075/ENSG00000106462/ENSG00000172724/ENSG00000126602…	ETFDH/GNAO1/CD36/PRDX6/PTGS1/PINK1/PYCR1/PDE8A/MET/KLF4/GPX3/HBB/PDGFD/BCL2/PPARGC1B/MB/CBX8/CRYAB/SESN2/SELENOP/CDK2/GPR37L1/EZH2/CCL19/TRAP1/HMOX1/ECT2/PPARGC1A/SCARA3/EPAS1/PTK2B/MELK/BTK/CPEB2/PRDX4/PNPT1/FKBP1B/MSRB3/PDK2/CDK1/TP53INP1/HBA2/FBLN5/MSRA/PRKN/SIGMAR1/CAPN2/TMEM161A/NOX4/FANCD2/AGAP3/TXNIP/PRR5L/NCF1/FZD1/SMPD3/TRPA1/SLC8A1/LRRK2/TPM1/MAPK3/SLC7A11/AIF1/DHRS2/SGK2/FOSL1/CCNA2/TR…	GO_BP
56	GO:0007059~chromosome segregation	79	79/2754	316/18012	4.06963e-06	0.000191334	1.63508	ENSG00000102409/ENSG00000071539/ENSG00000113580/ENSG00000123485/ENSG00000101782/ENSG00000146670/ENSG00000169679/ENSG00000132341/ENSG00000142945/ENSG00000148335/ENSG00000114346/ENSG00000165480/ENSG00000186185/ENSG00000089685/ENSG00000134057/ENSG00000117650/ENSG00000137807/ENSG00000161800/ENSG00000136982/ENSG00000154920/ENSG00000090889/ENSG00000121152/ENSG00000119541/ENSG00000166451/ENSG00000151503…	BEX4/TRIP13/NR3C1/HJURP/RIOK3/CDCA5/BUB1/RAN/KIF2C/NTMT1/ECT2/SKA3/KIF18B/BIRC5/CCNB1/NEK2/KIF23/RACGAP1/DSCC1/EME1/KIF4A/NCAPH/VPS4B/CENPN/NCAPD3/PLK1/KIFC1/CDC6/RRS1/MAD2L1/PRC1/MEI1/NUF2/PCID2/KIF14/DSN1/PSRC1/FANCD2/CDCA8/TOP2A/PTTG1/SPC25/CCNB1IP1/KIF18A/MAPK15/TACC3/RCC1/BRCA1/KLHDC8B/CENPF/MAD2L2/NCAPG/SPDL1/BUB1B/APC/NAA10/CENPW/SPAG5/CCNE1/KNSTRN/TTK/DDX11/CDT1/ESPL1/NUSAP1/CDC20/HASPIN/…	GO_BP
57	GO:0051271~negative regulation of cellular component movement	86	86/2754	352/18012	4.18199e-06	0.000191467	1.59792	ENSG00000137872/ENSG00000105894/ENSG00000164442/ENSG00000271447/ENSG00000141052/ENSG00000107562/ENSG00000111863/ENSG00000107937/ENSG00000010319/ENSG00000108187/ENSG00000121933/ENSG00000136826/ENSG00000112175/ENSG00000081189/ENSG00000171791/ENSG00000140832/ENSG00000092421/ENSG00000102265/ENSG00000181751/ENSG00000117115/ENSG00000106299/ENSG00000171522/ENSG00000100292/ENSG00000163686/ENSG00000122707…	SEMA6D/PTN/CITED2/MMP28/MYOCD/CXCL12/ADTRP/GTPBP4/SEMA3G/PBLD/TMIGD3/KLF4/BMP5/MEF2C/BCL2/MARVELD3/SEMA6A/TIMP1/C5orf30/PADI2/WASL/PTGER4/HMOX1/ABHD6/RECK/ARPIN/PPARGC1A/CCL28/SLIT2/ILK/MAGI2/ACVRL1/PTPRR/WNT3/CCL21/TP53INP1/ACVR1C/NRG1/MAPK15/PRKG1/FGF2/SMAD7/C16orf45/PPARD/RIPOR2/ADGRG1/NDRG4/WAS/TPM1/AIF1/SEMA4G/IFITM1/FBLN1/FAM60A/SLC9A3R1/DCN/CYGB/MMRN2/GCSAM/STC1/ANGPT2/SHH/EVL/CXCL13/MCC/D…	GO_BP
58	GO:0007015~actin filament organization	94	94/2754	394/18012	4.46629e-06	0.000199408	1.56038	ENSG00000168309/ENSG00000130055/ENSG00000101605/ENSG00000198121/ENSG00000088280/ENSG00000107562/ENSG00000006747/ENSG00000109265/ENSG00000163431/ENSG00000105976/ENSG00000165410/ENSG00000171791/ENSG00000155846/ENSG00000078114/ENSG00000172403/ENSG00000172661/ENSG00000171992/ENSG00000106299/ENSG00000171522/ENSG00000116574/ENSG00000173898/ENSG00000242498/ENSG00000137486/ENSG00000090020/ENSG00000139725…	FAM107A/GDPD2/MYOM1/LPAR1/ASAP3/CXCL12/SCIN/KIAA1211/LMOD1/MET/CFL2/BCL2/PPARGC1B/NEBL/SYNPO2/WASHC2C/SYNPO/WASL/PTGER4/RHOU/SPTBN2/ARPIN/ARRB1/SLC9A1/RHOF/SLIT2/GSN/PTK2B/PLS1/DIAPH3/F2RL1/ACTR3B/MARCKS/CCL21/GAS7/LIMA1/PRKN/PDLIM3/ARHGAP25/NOX4/CAP2/SHROOM3/IQGAP2/SH3BP1/VILL/S1PR1/MAD2L2/NCKAP1L/ARHGAP28/WAS/TPM1/AIF1/HCLS1/SORBS1/TMOD2/CCL11/GMFG/CDC42EP3/PLEKHH2/EFS/RHOJ/RHOH/SORBS2/PLS3/HCK…	GO_BP
59	GO:0050731~positive regulation of peptidyl-tyrosine phosphorylation	53	53/2754	189/18012	4.86637e-06	0.000211193	1.83405	ENSG00000160712/ENSG00000135218/ENSG00000157193/ENSG00000112964/ENSG00000153162/ENSG00000157404/ENSG00000104312/ENSG00000146918/ENSG00000026508/ENSG00000112715/ENSG00000120899/ENSG00000134352/ENSG00000107954/ENSG00000136960/ENSG00000150594/ENSG00000086991/ENSG00000157168/ENSG00000184349/ENSG00000158517/ENSG00000162367/ENSG00000049130/ENSG00000180353/ENSG00000095752/ENSG00000128342/ENSG00000110944…	IL6R/CD36/LRP8/GHR/BMP6/KIT/RIPK2/NCAPG2/CD44/VEGFA/PTK2B/IL6ST/NEURL1/ENPP2/ADRA2A/NOX4/NRG1/EFNA5/NCF1/TAL1/KITLG/HCLS1/IL11/LIF/IL23A/ALKAL1/ANGPT1/CSF1R/THBS4/STAP2/CD3E/NTRK2/CCL5/TGFA/ITGB3/FGF7/NEDD9/EPHA4/CD4/PTPRC/BANK1/IL18/CASS4/MIF/SRCIN1/CTF1/DOK7/AGT/AREG/OSM/CSF3/TDGF1/EREG	GO_BP
60	GO:0045926~negative regulation of growth	65	65/2754	248/18012	5.47321e-06	0.000231862	1.71419	ENSG00000205364/ENSG00000137872/ENSG00000205358/ENSG00000065320/ENSG00000198417/ENSG00000022267/ENSG00000184347/ENSG00000010319/ENSG00000187193/ENSG00000204614/ENSG00000171791/ENSG00000092421/ENSG00000197380/ENSG00000169418/ENSG00000125144/ENSG00000109846/ENSG00000130766/ENSG00000130513/ENSG00000100739/ENSG00000145287/ENSG00000143995/ENSG00000134533/ENSG00000145147/ENSG00000125148/ENSG00000145088…	MT1M/SEMA6D/MT1H/NTN1/MT1F/FHL1/SLIT3/SEMA3G/MT1X/TRIM40/BCL2/SEMA6A/DACT3/NPR1/MT1G/CRYAB/SESN2/GDF15/BDKRB1/PLAC8/MEIS1/RERG/SLIT2/MT2A/EAF2/APBB1/SOCS2/ACVRL1/INHBA/CYP27B1/PNPT1/MT1E/WNT3/SPART/PSRC1/ENPP1/RGS2/PPARD/CDHR2/WFDC1/MSX1/SEMA4G/MIR17HG/FGF13/SOX17/FRZB/STC2/CDKN1A/CDA/DUSP10/PTPRS/BMP4/SFRP2/SEMA3B/HSPA1A/TP73/NOV/RTN4R/NKD1/AGT/CCDC85B/CDKN2A/SERPINE2/SPP1/WNT5A	GO_BP
61	GO:0009410~response to xenobiotic stimulus	74	74/2754	293/18012	5.49207e-06	0.000231862	1.65182	ENSG00000197165/ENSG00000242515/ENSG00000186642/ENSG00000087258/ENSG00000150471/ENSG00000095303/ENSG00000166311/ENSG00000196502/ENSG00000096384/ENSG00000005249/ENSG00000048052/ENSG00000112964/ENSG00000163347/ENSG00000113580/ENSG00000171428/ENSG00000213366/ENSG00000090447/ENSG00000084774/ENSG00000196620/ENSG00000131471/ENSG00000142875/ENSG00000109819/ENSG00000173597/ENSG00000166508/ENSG00000156804…	SULT1A2/UGT1A10/PDE2A/GNAO1/ADGRL3/PTGS1/SMPD1/SULT1A1/HSP90AB1/PRKAR2B/HDAC9/GHR/CLDN1/NR3C1/NAT1/GSTM2/TFAP4/CAD/UGT2B15/AOC3/PRKACB/PPARGC1A/SULT1B1/MCM7/FBXO32/NAT2/PCK1/PTK2B/E2F1/CES2/OXTR/CYP2C18/CES3/HOMER1/MARC2/EPHX2/RGS2/TIAM1/SLC8A1/PDE1B/AOC1/CYP26B1/EIF4EBP1/AIF1/CCNA2/ASIC1/NQO2/FOXO1/SDK1/PCNA/GSTM4/CMBL/CYP2S1/DNMT3B/DDIT4/CYP2D7/RORA/CES1/DPEP1/AKR1C1/MT-ND6/AQP1/GSTP1/ARNT2/CYP…	GO_BP
62	GO:0006271~DNA strand elongation involved in DNA replication	12	2754-12-01	20/18012	6.02111e-06	0.000242643	3.92418	ENSG00000112118/ENSG00000133119/ENSG00000106628/ENSG00000166508/ENSG00000104889/ENSG00000163918/ENSG00000104738/ENSG00000101003/ENSG00000138346/ENSG00000132646/ENSG00000131153/ENSG00000147536	MCM3/RFC3/POLD2/MCM7/RNASEH2A/RFC4/MCM4/GINS1/DNA2/PCNA/GINS2/GINS4	GO_BP
63	GO:1905818~regulation of chromosome separation	24	24/2754	62/18012	6.17301e-06	0.000247159	2.53173	ENSG00000071539/ENSG00000169679/ENSG00000134057/ENSG00000166851/ENSG00000094804/ENSG00000164109/ENSG00000126226/ENSG00000164611/ENSG00000181085/ENSG00000013810/ENSG00000117724/ENSG00000116670/ENSG00000040275/ENSG00000156970/ENSG00000134982/ENSG00000112742/ENSG00000167513/ENSG00000135476/ENSG00000117399/ENSG00000178999/ENSG00000126787/ENSG00000138778/ENSG00000120129/ENSG00000138411	TRIP13/BUB1/CCNB1/PLK1/CDC6/MAD2L1/PCID2/PTTG1/MAPK15/TACC3/CENPF/MAD2L2/SPDL1/BUB1B/APC/TTK/CDT1/ESPL1/CDC20/AURKB/DLGAP5/CENPE/DUSP1/HECW2	GO_BP
64	GO:0001101~response to acid chemical	83	83/2754	340/18012	6.31632e-06	0.000251276	1.5966	ENSG00000105894/ENSG00000107864/ENSG00000004799/ENSG00000135218/ENSG00000186469/ENSG00000086696/ENSG00000158828/ENSG00000165457/ENSG00000105989/ENSG00000109339/ENSG00000145936/ENSG00000136826/ENSG00000099194/ENSG00000163347/ENSG00000125398/ENSG00000170962/ENSG00000153162/ENSG00000239672/ENSG00000066468/ENSG00000130766/ENSG00000151632/ENSG00000135446/ENSG00000171522/ENSG00000172724/ENSG00000110090…	PTN/CPEB3/PDK4/CD36/GNG2/HSD17B2/PINK1/FOLR2/WNT2/MAPK10/KCNMB1/KLF4/SCD/CLDN1/SOX9/PDGFD/BMP6/NME1/FGFR2/SESN2/AKR1C2/CDK4/PTGER4/CCL19/CPT1A/SHMT2/PPARGC1A/CCNB1/VEGFA/PCK1/GSN/PTK2B/E2F1/LTK/NEURL1/RXRA/WNT3/CCL21/PID1/LRP11/PDX1/CAPN2/TMEM161A/ATP2B4/ITGA2/WNT9A/DGAT2/CYP26B1/CEBPB/ZEB1/ASNS/FOXO1/COL1A1/PCNA/NTRK2/CD38/PDGFRA/RET/ABCA1/PTGER2/PTGFR/COL4A1/TESC/WNT5B/AKR1C1/TGFBR3/CCR7/PTK7/A…	GO_BP
65	GO:0046677~response to antibiotic	79	79/2754	320/18012	6.72816e-06	0.000263243	1.61464	ENSG00000173175/ENSG00000087258/ENSG00000158828/ENSG00000183010/ENSG00000073417/ENSG00000145936/ENSG00000110092/ENSG00000105976/ENSG00000136826/ENSG00000164120/ENSG00000244734/ENSG00000163347/ENSG00000170962/ENSG00000081189/ENSG00000181856/ENSG00000171791/ENSG00000198125/ENSG00000141570/ENSG00000109846/ENSG00000066468/ENSG00000139193/ENSG00000069535/ENSG00000170075/ENSG00000106462/ENSG00000126602…	ADCY5/GNAO1/PINK1/PYCR1/PDE8A/KCNMB1/CCND1/MET/KLF4/HPGD/HBB/CLDN1/PDGFD/MEF2C/SLC2A4/BCL2/MB/CBX8/CRYAB/FGFR2/CD27/MAOB/GPR37L1/EZH2/TRAP1/HMOX1/AOC3/ECT2/SLC9A1/GNAI1/GSN/PTK2B/CLU/TIMELESS/FKBP1B/CDK1/TP53INP1/HBA2/SIGMAR1/CAPN2/TXNIP/EFNA5/RGS2/ZC3H8/SMPD3/TRPA1/SLC8A1/ADH6/AOC1/LRRK2/EIF4EBP1/FOSL1/TRPC6/DDX11/FOXO1/GRIN2B/HYAL3/COL1A1/PCNA/AXL/FABP1/CD14/MT-ND6/AQP1/DUSP1/GSTP1/VCAM1/MT-ND5…	GO_BP
66	GO:0071887~leukocyte apoptotic process	34	34/2754	104/18012	7.05519e-06	0.000273653	2.13818	ENSG00000107562/ENSG00000171115/ENSG00000196950/ENSG00000081189/ENSG00000139193/ENSG00000172724/ENSG00000153094/ENSG00000010671/ENSG00000137077/ENSG00000144161/ENSG00000106571/ENSG00000151012/ENSG00000049130/ENSG00000180353/ENSG00000131981/ENSG00000171608/ENSG00000215417/ENSG00000178999/ENSG00000271503/ENSG00000157514/ENSG00000167601/ENSG00000160654/ENSG00000168961/ENSG00000107099/ENSG00000126353…	CXCL12/GIMAP8/SLC39A10/MEF2C/CD27/CCL19/BCL2L11/BTK/CCL21/ZC3H8/GLI3/SLC7A11/KITLG/HCLS1/LGALS3/PIK3CD/MIR17HG/AURKB/CCL5/TSC22D3/AXL/CD3G/LGALS9/DOCK8/CCR7/P2RX7/BMP4/LILRB1/MIF/ARG2/CCR5/CDKN2A/NOD2/WNT5A	GO_BP
67	GO:0071216~cellular response to biotic stimulus	61	61/2754	231/18012	8.14358e-06	0.000309997	1.72709	ENSG00000150593/ENSG00000135218/ENSG00000114698/ENSG00000153162/ENSG00000081189/ENSG00000189067/ENSG00000135446/ENSG00000104312/ENSG00000136160/ENSG00000153094/ENSG00000109819/ENSG00000154920/ENSG00000134061/ENSG00000010671/ENSG00000113448/ENSG00000163251/ENSG00000162909/ENSG00000265972/ENSG00000112033/ENSG00000260314/ENSG00000172216/ENSG00000102882/ENSG00000112799/ENSG00000163739/ENSG00000174125…	PDCD4/CD36/PLSCR4/BMP6/MEF2C/LITAF/CDK4/RIPK2/EDNRB/BCL2L11/PPARGC1A/EME1/CD180/BTK/PDE4D/FZD5/CAPN2/TXNIP/PPARD/MRC1/CEBPB/MAPK3/LY86/CXCL1/TLR1/LDOC1/CCL5/FCGR2B/CXCL3/AXL/ABCA1/HCK/TLR6/GFI1/CXCL13/LY96/IL18/CD14/CXCL8/GSTP1/PTPN22/SERPINE1/IRAK2/LILRB1/CXCL11/CXCL2/MIF/SPON2/CXCL5/CCR5/LCN2/NOD2/LTF/WNT5A/ABCC2/CSF3/CXCL6/IL1RN/PDCD1LG2/CXCL10/IL1B	GO_BP
68	GO:1990868~response to chemokine	32	32/2754	96/18012	8.24194e-06	0.000309997	2.1801	ENSG00000107562/ENSG00000184347/ENSG00000181374/ENSG00000213088/ENSG00000121807/ENSG00000117115/ENSG00000275718/ENSG00000172724/ENSG00000145147/ENSG00000174600/ENSG00000120899/ENSG00000137077/ENSG00000111913/ENSG00000172156/ENSG00000064651/ENSG00000163739/ENSG00000271503/ENSG00000163734/ENSG00000156234/ENSG00000107099/ENSG00000169429/ENSG00000126353/ENSG00000120129/ENSG00000169248/ENSG00000081041…	CXCL12/SLIT3/CCL13/ACKR1/CCR2/PADI2/CCL15/CCL19/SLIT2/CMKLR1/PTK2B/CCL21/RIPOR2/CCL11/SLC12A2/CXCL1/CCL5/CXCL3/CXCL13/DOCK8/CXCL8/CCR7/DUSP1/CXCL11/CXCL2/CXCL5/CCR5/CXCL6/CCL20/CCL24/CXCL10/REG1A	GO_BP
69	GO:1990869~cellular response to chemokine	32	32/2754	96/18012	8.24194e-06	0.000309997	2.1801	ENSG00000107562/ENSG00000184347/ENSG00000181374/ENSG00000213088/ENSG00000121807/ENSG00000117115/ENSG00000275718/ENSG00000172724/ENSG00000145147/ENSG00000174600/ENSG00000120899/ENSG00000137077/ENSG00000111913/ENSG00000172156/ENSG00000064651/ENSG00000163739/ENSG00000271503/ENSG00000163734/ENSG00000156234/ENSG00000107099/ENSG00000169429/ENSG00000126353/ENSG00000120129/ENSG00000169248/ENSG00000081041…	CXCL12/SLIT3/CCL13/ACKR1/CCR2/PADI2/CCL15/CCL19/SLIT2/CMKLR1/PTK2B/CCL21/RIPOR2/CCL11/SLC12A2/CXCL1/CCL5/CXCL3/CXCL13/DOCK8/CXCL8/CCR7/DUSP1/CXCL11/CXCL2/CXCL5/CCR5/CXCL6/CCL20/CCL24/CXCL10/REG1A	GO_BP
70	GO:0071229~cellular response to acid chemical	56	56/2754	207/18012	8.70971e-06	0.000323917	1.76936	ENSG00000107864/ENSG00000004799/ENSG00000186469/ENSG00000158828/ENSG00000165457/ENSG00000105989/ENSG00000145936/ENSG00000136826/ENSG00000163347/ENSG00000125398/ENSG00000170962/ENSG00000239672/ENSG00000066468/ENSG00000130766/ENSG00000151632/ENSG00000135446/ENSG00000171522/ENSG00000110090/ENSG00000182199/ENSG00000109819/ENSG00000134057/ENSG00000112715/ENSG00000124253/ENSG00000120899/ENSG00000101412…	CPEB3/PDK4/GNG2/PINK1/FOLR2/WNT2/KCNMB1/KLF4/CLDN1/SOX9/PDGFD/NME1/FGFR2/SESN2/AKR1C2/CDK4/PTGER4/CPT1A/SHMT2/PPARGC1A/CCNB1/VEGFA/PCK1/PTK2B/E2F1/LTK/NEURL1/WNT3/PID1/CAPN2/WNT9A/DGAT2/CYP26B1/CEBPB/ZEB1/COL1A1/NTRK2/PDGFRA/RET/ABCA1/PTGER2/PTGFR/COL4A1/TESC/WNT5B/AKR1C1/PTK7/AQP1/EPHA3/AKR1C3/COL5A2/GJB3/KLF2/CYBB/WNT5A/COL1A2	GO_BP
71	GO:0045807~positive regulation of endocytosis	44	44/2754	150/18012	8.71643e-06	0.000323917	1.91849	ENSG00000136044/ENSG00000135218/ENSG00000069974/ENSG00000197943/ENSG00000116473/ENSG00000049759/ENSG00000106299/ENSG00000172724/ENSG00000137486/ENSG00000166402/ENSG00000145220/ENSG00000105270/ENSG00000112715/ENSG00000187391/ENSG00000120885/ENSG00000164251/ENSG00000117472/ENSG00000171388/ENSG00000137077/ENSG00000164171/ENSG00000134516/ENSG00000188906/ENSG00000123338/ENSG00000151746/ENSG00000154188…	APPL2/CD36/RAB27A/PLCG2/RAP1A/NEDD4L/WASL/CCL19/ARRB1/TUB/LYAR/CLIP3/VEGFA/MAGI2/CLU/F2RL1/TSPAN1/APLN/CCL21/ITGA2/DOCK2/LRRK2/NCKAP1L/BICD1/ANGPT1/PCSK9/FCGR2B/AXL/B2M/TFR2/PTPRC/CAMK1D/CD14/SERPINE1/C2/IL2RB/SLC11A1/GATA2/SIRPG/CD300LF/WNT5A/SFRP4/C3/IL1B	GO_BP
72	GO:0010463~mesenchymal cell proliferation	19	19/2754	44/18012	8.82339e-06	0.000324012	2.82422	ENSG00000105894/ENSG00000105989/ENSG00000125398/ENSG00000066468/ENSG00000136997/ENSG00000125845/ENSG00000128573/ENSG00000112715/ENSG00000103241/ENSG00000163132/ENSG00000148516/ENSG00000140285/ENSG00000164690/ENSG00000077782/ENSG00000125378/ENSG00000196159/ENSG00000114251/ENSG00000101144/ENSG00000116132	PTN/WNT2/SOX9/FGFR2/MYC/BMP2/FOXP2/VEGFA/FOXF1/MSX1/ZEB1/FGF7/SHH/FGFR1/BMP4/FAT4/WNT5A/BMP7/PRRX1	GO_BP
73	GO:0051047~positive regulation of secretion	99	99/2754	427/18012	9.23775e-06	0.000337232	1.51637	ENSG00000204936/ENSG00000101605/ENSG00000169860/ENSG00000146469/ENSG00000124205/ENSG00000107562/ENSG00000171916/ENSG00000158828/ENSG00000006747/ENSG00000069974/ENSG00000075073/ENSG00000164850/ENSG00000153162/ENSG00000169418/ENSG00000104312/ENSG00000135124/ENSG00000124766/ENSG00000171522/ENSG00000172724/ENSG00000136160/ENSG00000165995/ENSG00000075142/ENSG00000137486/ENSG00000166313/ENSG00000119541…	CD177/MYOM1/P2RY1/VIP/EDN3/CXCL12/LGALS9C/PINK1/SCIN/RAB27A/TACR2/GPER1/BMP6/NPR1/RIPK2/P2RX4/SOX4/PTGER4/CCL19/EDNRB/CACNB2/SRI/ARRB1/APBB1/VPS4B/LGALS9B/INHBA/F2RL1/APLN/NMB/PLA2G10/OXTR/FZD5/C1QTNF12/PDX1/SMPD3/PPARD/LRRK2/STX1A/CD33/SYTL2/MAPK3/AIF1/P2RY2/MAP2K6/HYAL3/CSF1R/CACNA1H/C1QTNF3/TLR1/CLEC5A/AKAP12/ACHE/CD38/FERMT1/FCN1/RAB15/TRPM4/TFR2/VSNL1/CADM1/LGALS9/TNFRSF11A/FGFR1/SCAMP5/NLRP…	GO_BP
74	GO:0060402~calcium ion transport into cytosol	45	45/2754	155/18012	9.30586e-06	0.000337732	1.8988	ENSG00000145362/ENSG00000138193/ENSG00000164850/ENSG00000198523/ENSG00000197943/ENSG00000149596/ENSG00000103888/ENSG00000171791/ENSG00000135124/ENSG00000151320/ENSG00000213366/ENSG00000172724/ENSG00000100739/ENSG00000075142/ENSG00000156738/ENSG00000155962/ENSG00000120899/ENSG00000105464/ENSG00000113448/ENSG00000150995/ENSG00000105974/ENSG00000119782/ENSG00000137077/ENSG00000104369/ENSG00000198947…	ANK2/PLCE1/GPER1/PLN/PLCG2/JPH2/CEMIP/BCL2/P2RX4/AKAP6/GSTM2/CCL19/BDKRB1/SRI/MS4A1/CLIC2/PTK2B/GRIN2D/PDE4D/ITPR1/CAV1/FKBP1B/CCL21/JPH1/DMD/CACNA2D1/CAMK2D/ATP2B4/TRPA1/FGF2/SLC8A1/MYO5A/MCOLN2/GRIN2B/CD4/PTPRC/TRPC1/CCR7/P2RX7/THY1/LIME1/CXCL11/CCR5/TRPM2/CXCL10	GO_BP
75	GO:0050878~regulation of body fluid levels	112	112/2754	497/18012	9.78969e-06	0.000353226	1.47387	ENSG00000204936/ENSG00000168447/ENSG00000173175/ENSG00000169860/ENSG00000138722/ENSG00000146469/ENSG00000108405/ENSG00000135218/ENSG00000186469/ENSG00000166501/ENSG00000111863/ENSG00000088256/ENSG00000159307/ENSG00000069974/ENSG00000160685/ENSG00000005249/ENSG00000162104/ENSG00000110092/ENSG00000105976/ENSG00000244734/ENSG00000197943/ENSG00000163347/ENSG00000124491/ENSG00000158006/ENSG00000239672…	CD177/SCNN1B/ADCY5/P2RY1/MMRN1/VIP/P2RX1/CD36/GNG2/PRKCB/ADTRP/GNA11/SCUBE1/RAB27A/ZBTB7B/PRKAR2B/ADCY9/CCND1/MET/HBB/PLCG2/CLDN1/F13A1/PAFAH2/NME1/NPR1/P2RX4/CAD/GNA13/PIK3CG/EDNRB/PPAT/XDH/HSD11B2/CSRP1/FLI1/CEACAM1/ARRB1/PRKACB/VEGFA/PAPSS2/ILK/SOCS2/ITPR1/F2RL1/CAV1/APLN/NEURL1/SLC22A4/OXTR/ADRA2A/VDR/PRKG1/ITGA2/GRHL1/GNAQ/MYL9/GRHL3/CYP26B1/A2M/SYTL2/PLAU/WAS/MAPK3/SLC7A11/ZFPM2/TRPC6/P2RY2…	GO_BP
76	GO:0032308~positive regulation of prostaglandin secretion	8	2754-08-01	10/18012	9.96023e-06	0.000353376	5.23224	ENSG00000135124/ENSG00000069764/ENSG00000108984/ENSG00000141655/ENSG00000089041/ENSG00000240972/ENSG00000120659/ENSG00000125538	P2RX4/PLA2G10/MAP2K6/TNFRSF11A/P2RX7/MIF/TNFSF11/IL1B	GO_BP
77	GO:0050708~regulation of protein secretion	106	106/2754	465/18012	9.96469e-06	0.000353376	1.49091	ENSG00000100604/ENSG00000101605/ENSG00000173175/ENSG00000171916/ENSG00000111863/ENSG00000164850/ENSG00000048052/ENSG00000153162/ENSG00000116473/ENSG00000104312/ENSG00000124766/ENSG00000115590/ENSG00000171522/ENSG00000172724/ENSG00000012124/ENSG00000110090/ENSG00000075142/ENSG00000137486/ENSG00000129667/ENSG00000166313/ENSG00000170298/ENSG00000149577/ENSG00000205213/ENSG00000150995/ENSG00000164251…	CHGA/MYOM1/ADCY5/LGALS9C/ADTRP/GPER1/HDAC9/BMP6/RAP1A/RIPK2/SOX4/IL1R2/PTGER4/CCL19/CD22/CPT1A/SRI/ARRB1/RHBDF2/APBB1/LGALS9B/SIDT2/LGR4/ITPR1/F2RL1/FKBP1B/ACVR1C/ADRA2A/RSAD2/FZD5/PRKN/C1QTNF12/PDX1/EFNA5/TIAM1/PPARD/CPTP/LRRK2/P3H1/STX1A/CD33/MAPK3/AIF1/KRT20/ANGPT1/WISP1/CSF1R/C1QTNF3/TLR1/CLEC5A/AKAP12/ACHE/SYT11/CD38/CCL5/FERMT1/FCGR2B/FCN1/TRPM4/SLC2A1/KCNS3/VSNL1/TLR6/CADM1/SSC5D/FOXA2/LGA…	GO_BP
78	GO:0007094~mitotic spindle assembly checkpoint	16	16/2754	34/18012	1.19105e-05	0.000403914	3.07779	ENSG00000071539/ENSG00000169679/ENSG00000134057/ENSG00000166851/ENSG00000164109/ENSG00000126226/ENSG00000117724/ENSG00000116670/ENSG00000040275/ENSG00000156970/ENSG00000134982/ENSG00000112742/ENSG00000167513/ENSG00000117399/ENSG00000178999/ENSG00000120129	TRIP13/BUB1/CCNB1/PLK1/MAD2L1/PCID2/CENPF/MAD2L2/SPDL1/BUB1B/APC/TTK/CDT1/CDC20/AURKB/DUSP1	GO_BP
79	GO:0031577~spindle checkpoint	16	16/2754	34/18012	1.19105e-05	0.000403914	3.07779	ENSG00000071539/ENSG00000169679/ENSG00000134057/ENSG00000166851/ENSG00000164109/ENSG00000126226/ENSG00000117724/ENSG00000116670/ENSG00000040275/ENSG00000156970/ENSG00000134982/ENSG00000112742/ENSG00000167513/ENSG00000117399/ENSG00000178999/ENSG00000120129	TRIP13/BUB1/CCNB1/PLK1/MAD2L1/PCID2/CENPF/MAD2L2/SPDL1/BUB1B/APC/TTK/CDT1/CDC20/AURKB/DUSP1	GO_BP
80	GO:0071173~spindle assembly checkpoint	16	16/2754	34/18012	1.19105e-05	0.000403914	3.07779	ENSG00000071539/ENSG00000169679/ENSG00000134057/ENSG00000166851/ENSG00000164109/ENSG00000126226/ENSG00000117724/ENSG00000116670/ENSG00000040275/ENSG00000156970/ENSG00000134982/ENSG00000112742/ENSG00000167513/ENSG00000117399/ENSG00000178999/ENSG00000120129	TRIP13/BUB1/CCNB1/PLK1/MAD2L1/PCID2/CENPF/MAD2L2/SPDL1/BUB1B/APC/TTK/CDT1/CDC20/AURKB/DUSP1	GO_BP
81	GO:0071174~mitotic spindle checkpoint	16	16/2754	34/18012	1.19105e-05	0.000403914	3.07779	ENSG00000071539/ENSG00000169679/ENSG00000134057/ENSG00000166851/ENSG00000164109/ENSG00000126226/ENSG00000117724/ENSG00000116670/ENSG00000040275/ENSG00000156970/ENSG00000134982/ENSG00000112742/ENSG00000167513/ENSG00000117399/ENSG00000178999/ENSG00000120129	TRIP13/BUB1/CCNB1/PLK1/MAD2L1/PCID2/CENPF/MAD2L2/SPDL1/BUB1B/APC/TTK/CDT1/CDC20/AURKB/DUSP1	GO_BP
82	GO:0015893~drug transport	57	57/2754	214/18012	1.20534e-05	0.000406542	1.74204	ENSG00000197375/ENSG00000123643/ENSG00000103257/ENSG00000107562/ENSG00000104267/ENSG00000158828/ENSG00000165457/ENSG00000125648/ENSG00000075073/ENSG00000244734/ENSG00000163347/ENSG00000181035/ENSG00000198125/ENSG00000173267/ENSG00000081923/ENSG00000136997/ENSG00000080644/ENSG00000185339/ENSG00000196517/ENSG00000122641/ENSG00000106688/ENSG00000138074/ENSG00000188536/ENSG00000185345/ENSG00000116741…	SLC22A5/SLC36A1/SLC7A5/CXCL12/CA2/PINK1/FOLR2/SLC25A23/TACR2/HBB/CLDN1/SLC25A42/MB/SNCG/ATP8B1/MYC/CHRNA3/TCN2/SLC6A9/INHBA/SLC1A1/SLC5A6/HBA2/PRKN/RGS2/SLC15A2/MAPK15/STRA6/SLC44A4/SLC25A32/SLC7A1/RAB3B/SLC7A11/SLC1A5/AMN/IPCEF1/SLC4A11/SYT11/CYGB/SLC46A1/SLC25A29/SLC22A3/SLC7A2/TCN1/AQP1/SLC11A1/SLC6A8/AGT/SYT7/SYT8/SLC6A20/SLC19A3/ABCC2/SLC13A3/SYT1/SYT13/SLC38A5	GO_BP
83	GO:0006937~regulation of muscle contraction	47	47/2754	166/18012	1.23986e-05	0.000413687	1.85177	ENSG00000100604/ENSG00000145362/ENSG00000108405/ENSG00000138193/ENSG00000141052/ENSG00000004776/ENSG00000156113/ENSG00000075073/ENSG00000164850/ENSG00000198523/ENSG00000157404/ENSG00000138735/ENSG00000135124/ENSG00000213366/ENSG00000080644/ENSG00000105851/ENSG00000165895/ENSG00000077157/ENSG00000075142/ENSG00000090020/ENSG00000130176/ENSG00000155962/ENSG00000134755/ENSG00000127914/ENSG00000113448…	CHGA/ANK2/P2RX1/PLCE1/MYOCD/HSPB6/KCNMA1/TACR2/GPER1/PLN/KIT/PDE5A/P2RX4/GSTM2/CHRNA3/PIK3CG/ARHGAP42/PPP1R12B/SRI/SLC9A1/CNN1/CLIC2/DSC2/AKAP9/PDE4D/CAV1/FKBP1B/OXTR/DMD/ADRA2A/ATP2B1/RGS2/CAMK2D/PRKG1/ITGA2/SMAD7/SLC8A1/MYL9/TPM1/FGF13/STC1/TRPM4/FLNA/GUCY1A3/SPHK1/TNNC1/NMU	GO_BP
84	GO:1903317~regulation of protein maturation	37	37/2754	120/18012	1.29244e-05	0.000422151	2.01659	ENSG00000163815/ENSG00000112936/ENSG00000126759/ENSG00000124766/ENSG00000115590/ENSG00000117322/ENSG00000142875/ENSG00000148180/ENSG00000116209/ENSG00000120885/ENSG00000155659/ENSG00000188906/ENSG00000175899/ENSG00000000971/ENSG00000176919/ENSG00000126453/ENSG00000203710/ENSG00000262655/ENSG00000173372/ENSG00000145506/ENSG00000179241/ENSG00000106327/ENSG00000159189/ENSG00000106366/ENSG00000173369…	CLEC3B/C7/CFP/SOX4/IL1R2/CR2/PRKACB/GSN/TMEM59/CLU/VSIG4/LRRK2/A2M/CFH/C8G/BCL2L12/CR1/SPON1/C1QA/NKD2/LDLRAD3/TFR2/C1QC/SERPINE1/C1QB/C2/CHAC1/MELTF/F12/C3AR1/BIRC3/SERPINE2/CFB/GAS1/SERPINF2/C3/IL1B	GO_BP
85	GO:0048659~smooth muscle cell proliferation	45	45/2754	157/18012	1.3364e-05	0.000425317	1.87461	ENSG00000160712/ENSG00000146469/ENSG00000150593/ENSG00000166831/ENSG00000141052/ENSG00000164850/ENSG00000136826/ENSG00000164120/ENSG00000170962/ENSG00000081189/ENSG00000169418/ENSG00000066468/ENSG00000100292/ENSG00000109819/ENSG00000165795/ENSG00000130176/ENSG00000166333/ENSG00000171388/ENSG00000154734/ENSG00000185532/ENSG00000164171/ENSG00000103056/ENSG00000115252/ENSG00000138685/ENSG00000112033…	IL6R/VIP/PDCD4/RBPMS2/MYOCD/GPER1/KLF4/HPGD/PDGFD/MEF2C/NPR1/FGFR2/HMOX1/PPARGC1A/NDRG2/CNN1/ILK/APLN/ADAMTS1/PRKG1/ITGA2/SMPD3/PDE1A/FGF2/PPARD/S1PR1/NDRG4/TPM1/AIF1/PRKDC/NQO2/WISP1/CCL5/CDKN1A/IL18/GSTP1/BMP4/NOTCH3/APOD/NOV/AKR1B1/AGT/TERT/SERPINF2/EREG	GO_BP
86	GO:0001503~ossification	91	91/2754	389/18012	1.44621e-05	0.000455779	1.52999	ENSG00000163815/ENSG00000160712/ENSG00000105894/ENSG00000130055/ENSG00000046653/ENSG00000078804/ENSG00000101938/ENSG00000107937/ENSG00000155850/ENSG00000125398/ENSG00000153162/ENSG00000112175/ENSG00000081189/ENSG00000067955/ENSG00000171791/ENSG00000155846/ENSG00000066468/ENSG00000196305/ENSG00000125845/ENSG00000171522/ENSG00000120156/ENSG00000120899/ENSG00000166333/ENSG00000134352/ENSG00000205213…	CLEC3B/IL6R/PTN/GDPD2/GPM6B/TP53INP2/CHRDL1/GTPBP4/SLC26A2/SOX9/BMP6/BMP5/MEF2C/CBFB/BCL2/PPARGC1B/FGFR2/IARS/BMP2/PTGER4/TEK/PTK2B/ILK/IL6ST/LGR4/CYP27B1/WNT3/DDX21/DDR2/ATP2B1/ENPP1/RASSF2/FZD1/SMPD3/SLC8A1/PBX1/FASN/S1PR1/GLI3/CEBPB/FBL/CSF1/MAPK3/MGP/FIGNL1/SNAI1/IFITM1/COL1A1/WISP1/COL11A1/MSX2/CLEC5A/ACHE/TWIST2/CTHRC1/XYLT1/STC1/TRPM4/LEF1/AXIN2/SHH/TNFRSF11A/COMP/P2RX7/BMP4/SFRP2/RRAS2/KR…	GO_BP
87	GO:0071241~cellular response to inorganic substance	57	57/2754	216/18012	1.62226e-05	0.000503388	1.72591	ENSG00000205364/ENSG00000205358/ENSG00000198417/ENSG00000139117/ENSG00000124772/ENSG00000151150/ENSG00000125648/ENSG00000187193/ENSG00000163347/ENSG00000166869/ENSG00000153162/ENSG00000081189/ENSG00000125144/ENSG00000123374/ENSG00000135124/ENSG00000100292/ENSG00000114346/ENSG00000068831/ENSG00000109819/ENSG00000134057/ENSG00000125148/ENSG00000122986/ENSG00000148180/ENSG00000111602/ENSG00000169715…	MT1M/MT1H/MT1F/CPNE8/CPNE5/ANK3/SLC25A23/MT1X/CLDN1/CHP2/BMP6/MEF2C/MT1G/CDK2/P2RX4/HMOX1/ECT2/RASGRP2/PPARGC1A/CCNB1/MT2A/HVCN1/GSN/TIMELESS/MT1E/PRKN/CAMK2D/NCF1/SMPD3/AOC1/CPNE7/LRRK2/MAPK3/CCNA2/DDX11/FOXO1/BLM/CPNE1/CACNA1H/SYT11/B2M/TFR2/SHH/DPEP1/AQP1/AKR1C3/MMP3/TFAP2A/SYT7/CYBB/SYT8/WNT5A/FSTL3/TRPM2/FOSB/SYT1/SYT13	GO_BP
88	GO:0040013~negative regulation of locomotion	86	86/2754	364/18012	1.65948e-05	0.000512374	1.54524	ENSG00000137872/ENSG00000105894/ENSG00000164442/ENSG00000271447/ENSG00000141052/ENSG00000107562/ENSG00000111863/ENSG00000107937/ENSG00000010319/ENSG00000108187/ENSG00000121933/ENSG00000136826/ENSG00000112175/ENSG00000081189/ENSG00000171791/ENSG00000140832/ENSG00000092421/ENSG00000102265/ENSG00000181751/ENSG00000117115/ENSG00000106299/ENSG00000171522/ENSG00000100292/ENSG00000163686/ENSG00000122707…	SEMA6D/PTN/CITED2/MMP28/MYOCD/CXCL12/ADTRP/GTPBP4/SEMA3G/PBLD/TMIGD3/KLF4/BMP5/MEF2C/BCL2/MARVELD3/SEMA6A/TIMP1/C5orf30/PADI2/WASL/PTGER4/HMOX1/ABHD6/RECK/ARPIN/PPARGC1A/CCL28/SLIT2/ILK/MAGI2/ACVRL1/PTPRR/WNT3/CCL21/TP53INP1/ACVR1C/NRG1/MAPK15/PRKG1/FGF2/SMAD7/C16orf45/PPARD/RIPOR2/ADGRG1/NDRG4/WAS/TPM1/AIF1/SEMA4G/IFITM1/FBLN1/FAM60A/SLC9A3R1/DCN/CYGB/MMRN2/GCSAM/STC1/ANGPT2/SHH/EVL/CXCL13/MCC/D…	GO_BP
89	GO:0071496~cellular response to external stimulus	81	81/2754	338/18012	1.67739e-05	0.000512802	1.56735	ENSG00000168309/ENSG00000176641/ENSG00000105894/ENSG00000147883/ENSG00000186642/ENSG00000169860/ENSG00000004799/ENSG00000141052/ENSG00000164342/ENSG00000165457/ENSG00000169372/ENSG00000181061/ENSG00000125398/ENSG00000153162/ENSG00000171791/ENSG00000134245/ENSG00000137757/ENSG00000064666/ENSG00000130766/ENSG00000135124/ENSG00000171522/ENSG00000100292/ENSG00000196664/ENSG00000090020/ENSG00000124253…	FAM107A/RNF152/PTN/CDKN2B/PDE2A/P2RY1/PDK4/MYOCD/TLR3/FOLR2/CRADD/HIGD1A/SOX9/BMP6/BCL2/WNT2B/CASP5/CNN2/SESN2/P2RX4/PTGER4/HMOX1/TLR7/SLC9A1/PCK1/KANK2/DSC2/CYP27B1/CHEK1/PDK2/FAS/ATP2B1/VDR/PMAIP1/ITGA2/TNFRSF10B/AOC1/LRRK2/RIPOR2/MAPK3/AIF1/GABARAP/FOSL1/GABARAPL1/P2RY2/ASNS/KRT20/NUDT1/FOXO1/COL1A1/PCSK9/ITGA4/MMP7/AXL/TRPM4/CDKN1A/SLC2A1/FOXA2/PTPRC/BRIP1/P2RX7/TLR8/AQP1/TLR5/GSTP1/SFRP2/AKR…	GO_BP
90	GO:0050673~epithelial cell proliferation	96	96/2754	417/18012	1.69707e-05	0.000513757	1.50568	ENSG00000105894/ENSG00000147883/ENSG00000062038/ENSG00000146469/ENSG00000107562/ENSG00000105989/ENSG00000171951/ENSG00000108187/ENSG00000110092/ENSG00000125398/ENSG00000153162/ENSG00000112175/ENSG00000081189/ENSG00000140832/ENSG00000183856/ENSG00000239672/ENSG00000157404/ENSG00000101445/ENSG00000066468/ENSG00000119138/ENSG00000136997/ENSG00000064300/ENSG00000125845/ENSG00000160593/ENSG00000128573…	PTN/CDKN2B/CDH3/VIP/CXCL12/WNT2/SCG2/PBLD/CCND1/SOX9/BMP6/BMP5/MEF2C/MARVELD3/IQGAP3/NME1/KIT/PPP1R16B/FGFR2/KLF9/MYC/NGFR/BMP2/JAML/FOXP2/EDNRB/XDH/HMOX1/CEACAM1/TEK/VEGFA/EAF2/WDR77/LIMS2/ACVRL1/SIDT2/LGR4/CAV1/APLN/ZNF304/BRCA2/UHRF1/TNFSF12/VDR/FGF2/AR/PPARD/WFDC1/CEBPB/CCL11/PRKDC/THBS4/ITGA4/CCL5/FERMT1/TGFA/ITGB3/LOXL2/FGF7/B2M/FAP/SHH/AKT3/NLRC3/MCC/TGFBR3/DUSP10/FGFR1/BMP4/ATOH8/SFRP2/MS…	GO_BP
91	GO:0051302~regulation of cell division	47	47/2754	168/18012	1.74603e-05	0.000523472	1.82973	ENSG00000105894/ENSG00000079335/ENSG00000101224/ENSG00000170962/ENSG00000165689/ENSG00000066468/ENSG00000136997/ENSG00000091651/ENSG00000112984/ENSG00000114346/ENSG00000183742/ENSG00000186185/ENSG00000087586/ENSG00000185862/ENSG00000112715/ENSG00000137807/ENSG00000161800/ENSG00000141441/ENSG00000197321/ENSG00000166851/ENSG00000094804/ENSG00000198901/ENSG00000139618/ENSG00000165891/ENSG00000118193…	PTN/CDC14A/CDC25B/PDGFD/SDCCAG3/FGFR2/MYC/ORC6/KIF20A/ECT2/MACC1/KIF18B/AURKA/EVI2B/VEGFA/KIF23/RACGAP1/GAREM1/SVIL/PLK1/CDC6/PRC1/BRCA2/E2F7/KIF14/TXNIP/FGF2/TAL1/ASPM/BLM/RBL1/AURKB/THBS4/TGFA/FGF7/SOX17/SHH/C10orf99/SFRP2/IL1A/KLHL13/SUSD2/MAP9/PGF/OSM/EREG/IL1B	GO_BP
92	GO:0002791~regulation of peptide secretion	110	110/2754	493/18012	1.85235e-05	0.000552676	1.4593	ENSG00000100604/ENSG00000101605/ENSG00000173175/ENSG00000171916/ENSG00000111863/ENSG00000164850/ENSG00000048052/ENSG00000153162/ENSG00000116473/ENSG00000104312/ENSG00000124766/ENSG00000115590/ENSG00000171522/ENSG00000172724/ENSG00000012124/ENSG00000110090/ENSG00000075142/ENSG00000137486/ENSG00000129667/ENSG00000166313/ENSG00000170298/ENSG00000149577/ENSG00000205213/ENSG00000150995/ENSG00000164251…	CHGA/MYOM1/ADCY5/LGALS9C/ADTRP/GPER1/HDAC9/BMP6/RAP1A/RIPK2/SOX4/IL1R2/PTGER4/CCL19/CD22/CPT1A/SRI/ARRB1/RHBDF2/APBB1/LGALS9B/SIDT2/LGR4/ITPR1/F2RL1/FKBP1B/APLN/ACVR1C/ADRA2A/RSAD2/FZD5/PRKN/C1QTNF12/PDX1/EFNA5/TIAM1/PPARD/CPTP/LRRK2/P3H1/STX1A/CD33/MAPK3/AIF1/KRT20/ANGPT1/WISP1/CSF1R/C1QTNF3/TLR1/CLEC5A/AKAP12/ACHE/SYT11/CD38/CCL5/FERMT1/FCGR2B/FCN1/TRPM4/SLC2A1/KCNS3/TFR2/VSNL1/TLR6/CADM1/SSC5D…	GO_BP
93	GO:0010717~regulation of epithelial to mesenchymal transition	29	29/2754	87/18012	2.14981e-05	0.000621331	2.1801	ENSG00000111846/ENSG00000108187/ENSG00000122694/ENSG00000130558/ENSG00000112175/ENSG00000197380/ENSG00000125845/ENSG00000106462/ENSG00000156299/ENSG00000101665/ENSG00000116670/ENSG00000124216/ENSG00000108821/ENSG00000134013/ENSG00000138795/ENSG00000168646/ENSG00000125798/ENSG00000140682/ENSG00000144824/ENSG00000125378/ENSG00000044524/ENSG00000145423/ENSG00000018408/ENSG00000162493/ENSG00000122691…	GCNT2/PBLD/GLIPR2/OLFM1/BMP5/DACT3/BMP2/EZH2/TIAM1/SMAD7/MAD2L2/SNAI1/COL1A1/LOXL2/LEF1/AXIN2/FOXA2/TGFB1I1/PHLDB2/BMP4/EPHA3/SFRP2/WWTR1/PDPN/TWIST1/FOXA1/BAMBI/BMP7/IL1B	GO_BP
94	GO:0048660~regulation of smooth muscle cell proliferation	44	44/2754	155/18012	2.15633e-05	0.000621331	1.8566	ENSG00000160712/ENSG00000146469/ENSG00000150593/ENSG00000166831/ENSG00000141052/ENSG00000164850/ENSG00000136826/ENSG00000164120/ENSG00000170962/ENSG00000081189/ENSG00000169418/ENSG00000066468/ENSG00000100292/ENSG00000109819/ENSG00000165795/ENSG00000130176/ENSG00000166333/ENSG00000171388/ENSG00000154734/ENSG00000185532/ENSG00000164171/ENSG00000103056/ENSG00000115252/ENSG00000138685/ENSG00000112033…	IL6R/VIP/PDCD4/RBPMS2/MYOCD/GPER1/KLF4/HPGD/PDGFD/MEF2C/NPR1/FGFR2/HMOX1/PPARGC1A/NDRG2/CNN1/ILK/APLN/ADAMTS1/PRKG1/ITGA2/SMPD3/PDE1A/FGF2/PPARD/S1PR1/NDRG4/TPM1/AIF1/PRKDC/NQO2/WISP1/CCL5/CDKN1A/IL18/GSTP1/BMP4/NOTCH3/APOD/AKR1B1/AGT/TERT/SERPINF2/EREG	GO_BP
95	GO:0032963~collagen metabolic process	34	34/2754	109/18012	2.17745e-05	0.000621331	2.0401	ENSG00000168477/ENSG00000271447/ENSG00000107738/ENSG00000116473/ENSG00000141570/ENSG00000090530/ENSG00000166482/ENSG00000167755/ENSG00000164171/ENSG00000103056/ENSG00000099953/ENSG00000112033/ENSG00000163131/ENSG00000117385/ENSG00000111077/ENSG00000149257/ENSG00000106397/ENSG00000008516/ENSG00000108821/ENSG00000137673/ENSG00000161544/ENSG00000078098/ENSG00000152952/ENSG00000089041/ENSG00000166670…	TNXB/MMP28/VSIR/RAP1A/CBX8/P3H2/MFAP4/KLK6/ITGA2/SMPD3/MMP11/PPARD/CTSS/P3H1/TNS2/SERPINH1/PLOD3/MMP25/COL1A1/MMP7/CYGB/FAP/PLOD2/P2RX7/MMP10/BMP4/MMP1/MMP3/ADAMTS2/COL5A1/COL1A2/SCX/MMP12/SERPINF2	GO_BP
96	GO:0034599~cellular response to oxidative stress	71	71/2754	289/18012	2.28874e-05	0.000642711	1.60679	ENSG00000135218/ENSG00000117592/ENSG00000158828/ENSG00000183010/ENSG00000073417/ENSG00000105976/ENSG00000136826/ENSG00000211445/ENSG00000170962/ENSG00000171791/ENSG00000155846/ENSG00000141570/ENSG00000130766/ENSG00000123374/ENSG00000170075/ENSG00000106462/ENSG00000126602/ENSG00000100292/ENSG00000114346/ENSG00000109819/ENSG00000116016/ENSG00000165304/ENSG00000010671/ENSG00000137449/ENSG00000138035…	CD36/PRDX6/PINK1/PYCR1/PDE8A/MET/KLF4/GPX3/PDGFD/BCL2/PPARGC1B/CBX8/SESN2/CDK2/GPR37L1/EZH2/TRAP1/HMOX1/ECT2/PPARGC1A/EPAS1/MELK/BTK/CPEB2/PNPT1/MSRB3/PDK2/CDK1/TP53INP1/FBLN5/MSRA/PRKN/SIGMAR1/TMEM161A/NOX4/FANCD2/AGAP3/PRR5L/NCF1/FZD1/SMPD3/LRRK2/TPM1/MAPK3/SLC7A11/AIF1/DHRS2/CCNA2/TRPC6/FOXO1/PCNA/PDGFRA/AXL/FABP1/TLR6/DPEP1/GSKIP/AQP1/GSTP1/AKR1C3/MMP3/NCF4/HSPA1A/DAPK1/CYP1B1/KLF2/CYBB/LCN2/…	GO_BP
97	GO:0022604~regulation of cell morphogenesis	108	108/2754	485/18012	2.40339e-05	0.000667929	1.4564	ENSG00000137872/ENSG00000105894/ENSG00000169860/ENSG00000065320/ENSG00000198121/ENSG00000124772/ENSG00000082397/ENSG00000107562/ENSG00000010319/ENSG00000162458/ENSG00000115993/ENSG00000157193/ENSG00000130449/ENSG00000006327/ENSG00000130558/ENSG00000176438/ENSG00000104880/ENSG00000006740/ENSG00000092421/ENSG00000160307/ENSG00000181374/ENSG00000157404/ENSG00000049759/ENSG00000112276/ENSG00000172661…	SEMA6D/PTN/P2RY1/NTN1/LPAR1/CPNE5/EPB41L3/CXCL12/SEMA3G/FBLIM1/TRAK2/LRP8/ZSWIM6/TNFRSF12A/OLFM1/SYNE3/ARHGEF18/ARHGAP44/SEMA6A/S100B/CCL13/KIT/NEDD4L/BVES/WASHC2C/NGFR/PALM/CHRNA3/GNA13/RHOU/ARPIN/L1CAM/RHOF/CD44/VEGFA/SLIT2/ARHGAP15/PLXNA1/PTK2B/ILK/LIMS2/ZEB2/STRIP2/WNT3/ENPP2/SPART/ITGA7/ITPKA/PRKN/KIF13B/PLXNA2/EFNA5/ZSWIM4/TIAM1/SHROOM3/LRRK2/MAP1B/UST/FGD2/TPM1/SEMA4G/PLEKHO1/TRPC6/CCL11/F…	GO_BP
98	GO:0071260~cellular response to mechanical stimulus	27	27/2754	79/18012	2.46192e-05	0.000667929	2.23529	ENSG00000186642/ENSG00000164342/ENSG00000169372/ENSG00000125398/ENSG00000153162/ENSG00000137757/ENSG00000064666/ENSG00000171522/ENSG00000196664/ENSG00000090020/ENSG00000149554/ENSG00000026103/ENSG00000164171/ENSG00000120889/ENSG00000111913/ENSG00000102882/ENSG00000108821/ENSG00000137673/ENSG00000117394/ENSG00000101916/ENSG00000240583/ENSG00000187554/ENSG00000135744/ENSG00000154864/ENSG00000125735…	PDE2A/TLR3/CRADD/SOX9/BMP6/CASP5/CNN2/PTGER4/TLR7/SLC9A1/CHEK1/FAS/ITGA2/TNFRSF10B/RIPOR2/MAPK3/COL1A1/MMP7/SLC2A1/TLR8/AQP1/TLR5/AGT/PIEZO2/TNFSF14/SCX/IL1B	GO_BP
99	GO:0001837~epithelial to mesenchymal transition	40	40/2754	137/18012	2.46571e-05	0.000667929	1.90958	ENSG00000111846/ENSG00000150593/ENSG00000105989/ENSG00000108187/ENSG00000122694/ENSG00000137273/ENSG00000130558/ENSG00000125398/ENSG00000112175/ENSG00000197380/ENSG00000066468/ENSG00000125845/ENSG00000106462/ENSG00000166197/ENSG00000070814/ENSG00000156299/ENSG00000101665/ENSG00000163132/ENSG00000116670/ENSG00000124216/ENSG00000108821/ENSG00000120149/ENSG00000134013/ENSG00000138795/ENSG00000168646…	GCNT2/PDCD4/WNT2/PBLD/GLIPR2/FOXF2/OLFM1/SOX9/BMP5/DACT3/FGFR2/BMP2/EZH2/NOLC1/TCOF1/TIAM1/SMAD7/MSX1/MAD2L2/SNAI1/COL1A1/MSX2/LOXL2/LEF1/AXIN2/FOXA2/TGFB1I1/TGFBR3/PHLDB2/BMP4/EPHA3/SFRP2/WWTR1/PDPN/TWIST1/WNT5A/FOXA1/BAMBI/BMP7/IL1B	GO_BP
100	GO:1904018~positive regulation of vasculature development	56	56/2754	214/18012	2.48617e-05	0.000667929	1.71148	ENSG00000160712/ENSG00000166501/ENSG00000141052/ENSG00000164342/ENSG00000004776/ENSG00000167323/ENSG00000109458/ENSG00000164850/ENSG00000136826/ENSG00000048052/ENSG00000170962/ENSG00000116473/ENSG00000157404/ENSG00000101445/ENSG00000100292/ENSG00000079385/ENSG00000120156/ENSG00000112715/ENSG00000120899/ENSG00000139567/ENSG00000159216/ENSG00000131845/ENSG00000239697/ENSG00000012048/ENSG00000138685…	IL6R/PRKCB/MYOCD/TLR3/HSPB6/STIM1/GAB1/GPER1/KLF4/HDAC9/PDGFD/RAP1A/KIT/PPP1R16B/HMOX1/CEACAM1/TEK/VEGFA/PTK2B/ACVRL1/RUNX1/ZNF304/TNFSF12/BRCA1/FGF2/PTGIS/ANXA3/HK2/CCL11/RHOJ/ANGPT2/AKT3/ADAM12/CHI3L1/CXCL8/AQP1/SERPINE1/SFRP2/IL1A/FGF18/SRPX2/PIK3R6/FGFBP1/GATA2/VASH2/C3AR1/CYP1B1/PGF/CYBB/TWIST1/WNT5A/TERT/SPHK1/C3/CCL24/IL1B	GO_BP
101	GO:0050663~cytokine secretion	60	60/2754	234/18012	2.51956e-05	0.000671091	1.677	ENSG00000135218/ENSG00000171916/ENSG00000160685/ENSG00000048052/ENSG00000104312/ENSG00000115590/ENSG00000171522/ENSG00000172724/ENSG00000170298/ENSG00000205213/ENSG00000164251/ENSG00000163251/ENSG00000224051/ENSG00000188906/ENSG00000102882/ENSG00000204472/ENSG00000153898/ENSG00000154188/ENSG00000104415/ENSG00000182578/ENSG00000082196/ENSG00000174125/ENSG00000258227/ENSG00000131016/ENSG00000132718…	CD36/LGALS9C/ZBTB7B/HDAC9/RIPK2/IL1R2/PTGER4/CCL19/LGALS9B/LGR4/F2RL1/FZD5/CPTP/LRRK2/MAPK3/AIF1/MCOLN2/ANGPT1/WISP1/CSF1R/C1QTNF3/TLR1/CLEC5A/AKAP12/SYT11/FERMT1/FCGR2B/ABCA1/FCN1/TLR6/CADM1/SSC5D/CHI3L1/LGALS9/BANK1/SCAMP5/NLRP2/CD14/CCR7/P2RX7/TLR8/TLR5/FFAR4/PTPN22/IL1A/LILRB1/MIF/AGT/ARG2/CD2/TWIST1/FOXP3/OSM/SRGN/NOD2/WNT5A/TRPV4/MMP12/IL1B/SAA1	GO_BP
102	GO:1903522~regulation of blood circulation	71	71/2754	290/18012	2.58502e-05	0.000685583	1.60125	ENSG00000100604/ENSG00000145362/ENSG00000087258/ENSG00000124205/ENSG00000108405/ENSG00000177098/ENSG00000185774/ENSG00000152642/ENSG00000167323/ENSG00000121933/ENSG00000198523/ENSG00000151090/ENSG00000169418/ENSG00000138735/ENSG00000137726/ENSG00000112276/ENSG00000067191/ENSG00000135124/ENSG00000213366/ENSG00000105851/ENSG00000165895/ENSG00000165995/ENSG00000075142/ENSG00000090020/ENSG00000168398…	CHGA/ANK2/GNAO1/EDN3/P2RX1/SCN4B/KCNIP4/GPD1L/STIM1/TMIGD3/PLN/THRB/NPR1/PDE5A/FXYD6/BVES/CACNB1/P2RX4/GSTM2/PIK3CG/ARHGAP42/CACNB2/SRI/SLC9A1/BDKRB2/EPAS1/POPDC2/CLIC2/DSC2/HSPB7/AKAP9/PDE4D/SLC1A1/ITPR1/F2RL1/CAV1/FKBP1B/APLN/OXTR/DMD/SCN1B/ADRA2A/KCNJ14/ECE1/ATP2B1/RGS2/CACNA2D1/CAMK2D/ATP2B4/DES/SMAD7/SLC8A1/TPM1/ATP2A3/CACNA1H/FGF13/CD38/CORIN/STC1/PTGER2/FXYD3/TRPM4/KCND3/TRPC1/FLNA/RNLS/AT…	GO_BP
103	GO:0032956~regulation of actin cytoskeleton organization	80	80/2754	337/18012	2.69656e-05	0.000711045	1.55259	ENSG00000168309/ENSG00000046653/ENSG00000198121/ENSG00000088280/ENSG00000107562/ENSG00000006747/ENSG00000109265/ENSG00000163431/ENSG00000105976/ENSG00000006740/ENSG00000165410/ENSG00000081189/ENSG00000172403/ENSG00000172661/ENSG00000171992/ENSG00000106299/ENSG00000171522/ENSG00000116574/ENSG00000114346/ENSG00000173898/ENSG00000242498/ENSG00000090020/ENSG00000139725/ENSG00000120156/ENSG00000145147…	FAM107A/GPM6B/LPAR1/ASAP3/CXCL12/SCIN/KIAA1211/LMOD1/MET/ARHGAP44/CFL2/MEF2C/SYNPO2/WASHC2C/SYNPO/WASL/PTGER4/RHOU/ECT2/SPTBN2/ARPIN/SLC9A1/RHOF/TEK/SLIT2/DIXDC1/GSN/PTK2B/ILK/JAM3/F2RL1/ACTR3B/CCL21/LIMA1/PRKN/NOX4/CELSR1/EFNA5/IQGAP2/BST1/SH3BP1/GRHL3/VILL/S1PR1/NCKAP1L/ARHGAP28/WAS/TPM1/HCLS1/TMOD2/CCL11/GMFG/CSF1R/CDC42EP3/PLEKHH2/RHOJ/RHOH/PDGFRA/HCK/AVIL/SPTBN5/EVL/ARHGEF19/PHLDB2/CCR7/EPHA…	GO_BP
104	GO:0002697~regulation of immune effector process	91	91/2754	395/18012	2.70394e-05	0.000711045	1.50675	ENSG00000204936/ENSG00000136044/ENSG00000112936/ENSG00000163687/ENSG00000135218/ENSG00000164342/ENSG00000127951/ENSG00000137265/ENSG00000160685/ENSG00000158473/ENSG00000116473/ENSG00000126759/ENSG00000101782/ENSG00000121807/ENSG00000104312/ENSG00000172724/ENSG00000117322/ENSG00000012124/ENSG00000100292/ENSG00000079385/ENSG00000144381/ENSG00000170476/ENSG00000101695/ENSG00000010671/ENSG00000120885…	CD177/APPL2/C7/DNASE1L3/CD36/TLR3/FGL2/IRF4/ZBTB7B/CD1D/RAP1A/CFP/RIOK3/CCR2/RIPK2/CCL19/CR2/CD22/HMOX1/CEACAM1/HSPD1/MZB1/RNF125/BTK/CLU/F2RL1/ULBP3/DDX21/RSAD2/FZD5/CD96/VSIG4/DDX60/SMAD7/FOXF1/MAD2L2/A2M/CFH/C8G/WAS/SASH3/MAPK3/CR1/TNFSF13/LGALS3/IL23A/PRKDC/ANGPT1/SPINK5/ATAD5/VAV1/FCGR2B/C1QA/B2M/TRPM4/IL1R1/CADM1/PTPRC/IFIT1/LAG3/LGALS9/CD226/DUSP10/IL18/C1QC/CD28/ZP3/P2RX7/ENPP3/C1QB/C2/PI…	GO_BP
105	GO:0008202~steroid metabolic process	79	79/2754	332/18012	2.76412e-05	0.000712661	1.55628	ENSG00000197165/ENSG00000135437/ENSG00000116833/ENSG00000086696/ENSG00000073737/ENSG00000278535/ENSG00000166311/ENSG00000196502/ENSG00000070882/ENSG00000076555/ENSG00000099194/ENSG00000153162/ENSG00000112175/ENSG00000157404/ENSG00000081923/ENSG00000151632/ENSG00000125845/ENSG00000196620/ENSG00000176387/ENSG00000132341/ENSG00000075239/ENSG00000198189/ENSG00000167315/ENSG00000109819/ENSG00000173597…	SULT1A2/RDH5/NR5A2/HSD17B2/DHRS9/DHRS11/SMPD1/SULT1A1/OSBPL3/ACACB/SCD/BMP6/BMP5/KIT/ATP8B1/AKR1C2/BMP2/UGT2B15/HSD11B2/RAN/ACAT1/HSD17B11/ACAA2/PPARGC1A/SULT1B1/SCP2/OSBPL1A/FAXDC2/LEPR/SEC14L2/CYP27B1/RXRA/LIMA1/APOBR/CLCN2/DHCR7/UGT2B17/EPHX2/SQLE/VDR/DGAT2/PPARD/PBX1/FASN/CYP26B1/EBPL/DHRS2/SNAI1/HSD17B6/CACNA1H/VLDLR/PCSK9/SULT2B1/PDGFRA/ABCA1/SHH/RORA/CES1/GFI1/AKR1C1/FGFR1/HMGCS2/SERPINA6/…	GO_BP
106	GO:0046683~response to organophosphorus	39	39/2754	133/18012	2.78021e-05	0.000712661	1.91783	ENSG00000103375/ENSG00000186642/ENSG00000169860/ENSG00000108405/ENSG00000198121/ENSG00000155846/ENSG00000116473/ENSG00000239672/ENSG00000135124/ENSG00000151320/ENSG00000105851/ENSG00000172572/ENSG00000133119/ENSG00000120156/ENSG00000124253/ENSG00000120899/ENSG00000127914/ENSG00000138035/ENSG00000091138/ENSG00000086991/ENSG00000183023/ENSG00000175592/ENSG00000175591/ENSG00000108821/ENSG00000159167…	AQP8/PDE2A/P2RY1/P2RX1/LPAR1/PPARGC1B/RAP1A/NME1/P2RX4/AKAP6/PIK3CG/PDE3A/RFC3/TEK/PCK1/PTK2B/AKAP9/PNPT1/SLC26A3/NOX4/SLC8A1/FOSL1/P2RY2/COL1A1/STC1/PER1/TRPM4/AKR1C1/P2RX7/AQP1/DUSP1/SPARC/KCNJ11/AREG/AQP9/VGF/FOSB/IL1B/PKLR	GO_BP
107	GO:1905039~carboxylic acid transmembrane transport	39	39/2754	133/18012	2.78021e-05	0.000712661	1.91783	ENSG00000123643/ENSG00000157184/ENSG00000178537/ENSG00000103257/ENSG00000170482/ENSG00000165457/ENSG00000076555/ENSG00000131389/ENSG00000110090/ENSG00000060762/ENSG00000116704/ENSG00000196517/ENSG00000139209/ENSG00000168003/ENSG00000106688/ENSG00000138074/ENSG00000116741/ENSG00000137868/ENSG00000118596/ENSG00000164933/ENSG00000139514/ENSG00000151012/ENSG00000103064/ENSG00000105281/ENSG00000076351…	SLC36A1/CPT2/SLC25A20/SLC7A5/SLC23A1/FOLR2/ACACB/SLC6A6/CPT1A/MPC1/SLC35D1/SLC6A9/SLC38A4/SLC3A2/SLC1A1/SLC5A6/RGS2/STRA6/SLC16A7/SLC25A32/SLC7A1/SLC7A11/SLC7A6/SLC1A5/SLC46A1/SLC25A29/SLC3A1/SLC7A2/SLC43A1/PDPN/SLC6A8/AGT/SLC6A20/SLC27A5/SLC13A3/AQP9/SLC6A14/EMB/SLC38A5	GO_BP
108	GO:0010810~regulation of cell-substrate adhesion	55	55/2754	210/18012	2.84945e-05	0.000723754	1.71294	ENSG00000111846/ENSG00000168309/ENSG00000154175/ENSG00000105894/ENSG00000138722/ENSG00000135218/ENSG00000046653/ENSG00000164176/ENSG00000171791/ENSG00000172661/ENSG00000090020/ENSG00000151882/ENSG00000120156/ENSG00000112715/ENSG00000120899/ENSG00000198759/ENSG00000166333/ENSG00000072163/ENSG00000139567/ENSG00000137077/ENSG00000162733/ENSG00000184349/ENSG00000103241/ENSG00000109743/ENSG00000122861…	GCNT2/FAM107A/ABI3BP/PTN/MMRN1/CD36/GPM6B/EDIL3/BCL2/WASHC2C/SLC9A1/CCL28/TEK/VEGFA/PTK2B/EGFL6/ILK/LIMS2/ACVRL1/CCL21/DDR2/EFNA5/FOXF1/BST1/PLAU/CSF1/CCDC80/NDNF/FBLN1/COL1A1/CD3E/FERMT1/MMRN2/ANGPT2/NEDD9/FBLN2/RELL2/PHLDB2/CCR7/SERPINE1/EPHA3/FLNA/THY1/APOD/SPOCK2/ECM2/MELTF/CASS4/ARHGAP6/PDPN/ONECUT2/CDKN2A/TACSTD2/COL8A1/MMP12	GO_BP
109	GO:0016042~lipid catabolic process	79	79/2754	333/18012	3.09036e-05	0.000764094	1.5516	ENSG00000171503/ENSG00000187091/ENSG00000138193/ENSG00000157184/ENSG00000138744/ENSG00000102886/ENSG00000117592/ENSG00000179163/ENSG00000011198/ENSG00000111863/ENSG00000166311/ENSG00000145384/ENSG00000122971/ENSG00000204099/ENSG00000158201/ENSG00000076555/ENSG00000161533/ENSG00000198074/ENSG00000197943/ENSG00000138029/ENSG00000158006/ENSG00000130766/ENSG00000135446/ENSG00000105851/ENSG00000110090…	ETFDH/PLCD1/PLCE1/CPT2/NAAA/GDPD3/PRDX6/FUCA1/ABHD5/ADTRP/SMPD1/FABP2/ACADS/NEU4/ABHD3/ACACB/ACOX1/AKR1B10/PLCG2/HADHB/PAFAH2/SESN2/CDK4/PIK3CG/CPT1A/ACAT1/ABHD6/HSD17B11/ACAA2/CROT/MGLL/PLD1/EHHADH/ABCD3/SCP2/PCK1/ACADM/ECI2/PAFAH1B3/CYP27B1/PLA2G10/ENPP2/ADRA2A/CES3/PLCD3/ETFBKMT/SMPD3/PLCD4/PPARD/PHYH/CYP26B1/PECR/BDH2/LIPH/PNPLA7/HSD17B6/CYP4F12/FABP6/FABP1/PLD4/PNLIPRP2/CRAT/CES1/LIPG/RARRES…	GO_BP
110	GO:0000727~double-strand break repair via break-induced replication	8	2754-08-01	11/18012	3.15887e-05	0.000771809	4.75659	ENSG00000112118/ENSG00000166508/ENSG00000073111/ENSG00000104738/ENSG00000093009/ENSG00000131153/ENSG00000147536/ENSG00000097046	MCM3/MCM7/MCM2/MCM4/CDC45/GINS2/GINS4/CDC7	GO_BP
111	GO:1905819~negative regulation of chromosome separation	17	17/2754	40/18012	3.35354e-05	0.000806669	2.77963	ENSG00000071539/ENSG00000169679/ENSG00000134057/ENSG00000166851/ENSG00000164109/ENSG00000126226/ENSG00000164611/ENSG00000117724/ENSG00000116670/ENSG00000040275/ENSG00000156970/ENSG00000134982/ENSG00000112742/ENSG00000167513/ENSG00000117399/ENSG00000178999/ENSG00000120129	TRIP13/BUB1/CCNB1/PLK1/MAD2L1/PCID2/PTTG1/CENPF/MAD2L2/SPDL1/BUB1B/APC/TTK/CDT1/CDC20/AURKB/DUSP1	GO_BP
112	GO:0030318~melanocyte differentiation	13	13/2754	26/18012	3.53056e-05	0.000833106	3.27015	ENSG00000124205/ENSG00000088256/ENSG00000069974/ENSG00000081189/ENSG00000171791/ENSG00000157404/ENSG00000136160/ENSG00000169554/ENSG00000197594/ENSG00000106571/ENSG00000197535/ENSG00000049130/ENSG00000187098	EDN3/GNA11/RAB27A/MEF2C/BCL2/KIT/EDNRB/ZEB2/ENPP1/GLI3/MYO5A/KITLG/MITF	GO_BP
113	GO:0045992~negative regulation of embryonic development	13	13/2754	26/18012	3.53056e-05	0.000833106	3.27015	ENSG00000142875/ENSG00000124216/ENSG00000072133/ENSG00000164736/ENSG00000125378/ENSG00000145423/ENSG00000204262/ENSG00000104290/ENSG00000130635/ENSG00000137573/ENSG00000166823/ENSG00000114251/ENSG00000101144	PRKACB/SNAI1/RPS6KA6/SOX17/BMP4/SFRP2/COL5A2/FZD3/COL5A1/SULF1/MESP1/WNT5A/BMP7	GO_BP
114	GO:0002526~acute inflammatory response	44	44/2754	158/18012	3.60185e-05	0.000846708	1.82135	ENSG00000160712/ENSG00000112936/ENSG00000163687/ENSG00000126759/ENSG00000105851/ENSG00000136160/ENSG00000117322/ENSG00000010671/ENSG00000134352/ENSG00000120885/ENSG00000155659/ENSG00000175899/ENSG00000000971/ENSG00000176919/ENSG00000172216/ENSG00000203710/ENSG00000198535/ENSG00000072694/ENSG00000173372/ENSG00000185010/ENSG00000177575/ENSG00000106327/ENSG00000141655/ENSG00000159189/ENSG00000188372…	IL6R/C7/DNASE1L3/CFP/PIK3CG/EDNRB/CR2/BTK/IL6ST/CLU/VSIG4/A2M/CFH/C8G/CEBPB/CR1/C2CD4A/FCGR2B/C1QA/F8/CD163/TFR2/TNFRSF11A/C1QC/ZP3/CCR7/GSTP1/C1QB/C2/VCAM1/IL1A/PTGER3/F12/C3AR1/TREM1/CFB/OSM/TNFSF11/SERPINF2/C3/C2CD4B/REG3A/IL1B/SAA1	GO_BP
115	GO:0060401~cytosolic calcium ion transport	46	46/2754	168/18012	3.84739e-05	0.000890929	1.7908	ENSG00000145362/ENSG00000138193/ENSG00000125648/ENSG00000164850/ENSG00000198523/ENSG00000197943/ENSG00000149596/ENSG00000103888/ENSG00000171791/ENSG00000135124/ENSG00000151320/ENSG00000213366/ENSG00000172724/ENSG00000100739/ENSG00000075142/ENSG00000156738/ENSG00000155962/ENSG00000120899/ENSG00000105464/ENSG00000113448/ENSG00000150995/ENSG00000105974/ENSG00000119782/ENSG00000137077/ENSG00000104369…	ANK2/PLCE1/SLC25A23/GPER1/PLN/PLCG2/JPH2/CEMIP/BCL2/P2RX4/AKAP6/GSTM2/CCL19/BDKRB1/SRI/MS4A1/CLIC2/PTK2B/GRIN2D/PDE4D/ITPR1/CAV1/FKBP1B/CCL21/JPH1/DMD/CACNA2D1/CAMK2D/ATP2B4/TRPA1/FGF2/SLC8A1/MYO5A/MCOLN2/GRIN2B/CD4/PTPRC/TRPC1/CCR7/P2RX7/THY1/LIME1/CXCL11/CCR5/TRPM2/CXCL10	GO_BP
116	GO:0051235~maintenance of location	77	77/2754	325/18012	4.05864e-05	0.000929444	1.54955	ENSG00000145362/ENSG00000104154/ENSG00000135218/ENSG00000138193/ENSG00000119950/ENSG00000151150/ENSG00000082397/ENSG00000011198/ENSG00000158828/ENSG00000125648/ENSG00000006747/ENSG00000076555/ENSG00000164850/ENSG00000198523/ENSG00000197943/ENSG00000149596/ENSG00000103888/ENSG00000176438/ENSG00000151320/ENSG00000213366/ENSG00000172724/ENSG00000165959/ENSG00000100739/ENSG00000075142/ENSG00000112559…	ANK2/SLC30A4/CD36/PLCE1/MXI1/ANK3/EPB41L3/ABHD5/PINK1/SLC25A23/SCIN/ACACB/GPER1/PLN/PLCG2/JPH2/CEMIP/SYNE3/AKAP6/GSTM2/CCL19/CLMN/BDKRB1/SRI/MDFI/HILPDA/GSN/CLIC2/PTK2B/AKAP9/PDE4D/ITPR1/CAV1/FKBP1B/CCL21/PLA2G10/JPH1/DMD/ACVR1C/SYNE1/SUN2/ENPP1/SQLE/CAMK2D/TRPA1/FGF2/DGAT2/SLC8A1/PPARD/MYO5A/MCOLN2/DZIP1/HK2/TONSL/ASPM/NRROS/FLNB/GPSM2/ITGB3/ABCA1/TLN2/CD4/PTPRC/TRPC1/CCR7/P2RX7/FLNA/THY1/LIME1/…	GO_BP
117	GO:0010876~lipid localization	90	90/2754	394/18012	4.18124e-05	0.000950505	1.49398	ENSG00000186198/ENSG00000163959/ENSG00000139433/ENSG00000135218/ENSG00000157184/ENSG00000178537/ENSG00000011198/ENSG00000145384/ENSG00000070882/ENSG00000076555/ENSG00000153162/ENSG00000174640/ENSG00000081923/ENSG00000135124/ENSG00000117758/ENSG00000068650/ENSG00000110090/ENSG00000183578/ENSG00000079385/ENSG00000005469/ENSG00000178075/ENSG00000135245/ENSG00000117528/ENSG00000116171/ENSG00000168398…	SLC51B/SLC51A/GLTP/CD36/CPT2/SLC25A20/ABHD5/FABP2/OSBPL3/ACACB/BMP6/SLCO2A1/ATP8B1/P2RX4/STX12/ATP11A/CPT1A/TNFAIP8L3/CEACAM1/CROT/GRAMD1C/HILPDA/ABCD3/SCP2/BDKRB2/GRAMD1A/OSBPL1A/TMEM30B/ABCA5/VPS4B/INHBA/PRELID3A/CLU/CAV1/NMB/RXRA/LIMA1/PLA2G10/ACVR1C/PLEKHA8P1/ATP8B4/PRKN/SIGMAR1/APOBR/PQLC1/ENPP1/SQLE/ATP8A1/DGAT2/SGPP1/PPARD/CPTP/STRA6/ATP8B2/ERFE/MAP2K6/VLDLR/PCSK9/ITGB3/ABCB1/ABCA1/FABP6/F…	GO_BP
118	GO:0043114~regulation of vascular permeability	16	16/2754	37/18012	4.40286e-05	0.000990005	2.82824	ENSG00000186642/ENSG00000075073/ENSG00000153162/ENSG00000169418/ENSG00000172572/ENSG00000079385/ENSG00000168398/ENSG00000120156/ENSG00000112715/ENSG00000145147/ENSG00000154188/ENSG00000131016/ENSG00000198535/ENSG00000184489/ENSG00000111199/ENSG00000205502	PDE2A/TACR2/BMP6/NPR1/PDE3A/CEACAM1/BDKRB2/TEK/VEGFA/SLIT2/ANGPT1/AKAP12/C2CD4A/PTP4A3/TRPV4/C2CD4B	GO_BP
119	GO:0045446~endothelial cell differentiation	33	33/2754	109/18012	5.57487e-05	0.00118892	1.98009	ENSG00000105894/ENSG00000186642/ENSG00000159307/ENSG00000184113/ENSG00000105976/ENSG00000163347/ENSG00000153162/ENSG00000116473/ENSG00000101445/ENSG00000158125/ENSG00000079385/ENSG00000112715/ENSG00000139567/ENSG00000113448/ENSG00000164251/ENSG00000157168/ENSG00000114790/ENSG00000169710/ENSG00000170989/ENSG00000106397/ENSG00000148516/ENSG00000159167/ENSG00000164736/ENSG00000105426/ENSG00000081052…	PTN/PDE2A/SCUBE1/CLDN5/MET/CLDN1/BMP6/RAP1A/PPP1R16B/XDH/CEACAM1/VEGFA/ACVRL1/PDE4D/F2RL1/NRG1/ARHGEF26/FASN/S1PR1/PLOD3/ZEB1/STC1/SOX17/PTPRS/COL4A4/BMP4/ATOH8/PDPN/RDX/PROX1/MESP1/GSTM3/IL1B	GO_BP
120	GO:0006575~cellular modified amino acid metabolic process	52	52/2754	200/18012	5.71838e-05	0.00121535	1.70048	ENSG00000120254/ENSG00000165457/ENSG00000158467/ENSG00000111684/ENSG00000176928/ENSG00000213366/ENSG00000065911/ENSG00000110090/ENSG00000182199/ENSG00000005469/ENSG00000173597/ENSG00000105755/ENSG00000172197/ENSG00000117054/ENSG00000101444/ENSG00000123131/ENSG00000138074/ENSG00000069764/ENSG00000197208/ENSG00000104324/ENSG00000164933/ENSG00000106397/ENSG00000151012/ENSG00000223572/ENSG00000237289…	MTHFD1L/FOLR2/AHCYL2/LPCAT3/GCNT4/GSTM2/MTHFD2/CPT1A/SHMT2/CROT/SULT1B1/ETHE1/MBOAT1/ACADM/AHCY/PRDX4/SLC5A6/PLA2G10/SLC22A4/CPQ/SLC25A32/PLOD3/SLC7A11/CKMT1A/CKMT1B/LPCAT4/GSTM4/SLC46A1/GGT6/TG/CRAT/ALDH4A1/DPEP1/PLOD2/GSTP1/GAMT/CHAC1/SERINC2/CKB/ALDH1L1/DIO2/SLC6A8/P4HA3/PLA2G4F/VNN2/EGLN3/GATM/GSTM1/GSTM3/PLA2G4A/PLA2G2A/CKMT2	GO_BP
121	GO:0042692~muscle cell differentiation	85	85/2754	371/18012	6.03188e-05	0.00125702	1.49845	ENSG00000145362/ENSG00000101605/ENSG00000150593/ENSG00000077943/ENSG00000166831/ENSG00000141052/ENSG00000154330/ENSG00000164850/ENSG00000108773/ENSG00000163431/ENSG00000048052/ENSG00000125398/ENSG00000165410/ENSG00000081189/ENSG00000171791/ENSG00000078114/ENSG00000157404/ENSG00000066468/ENSG00000112276/ENSG00000154277/ENSG00000072195/ENSG00000151320/ENSG00000125845/ENSG00000130513/ENSG00000106462…	ANK2/MYOM1/PDCD4/ITGA8/RBPMS2/MYOCD/PGM5/GPER1/KAT2A/LMOD1/HDAC9/SOX9/CFL2/MEF2C/BCL2/NEBL/KIT/FGFR2/BVES/UCHL1/SPEG/AKAP6/BMP2/GDF15/EZH2/EDNRB/CSRP1/KIAA1161/BARX2/SLC9A1/CCNB1/VEGFA/MYH11/POPDC2/RXRA/CAPN9/DMD/CDK1/SYNE1/CAPN2/HOMER1/NOX4/NRG1/RGS2/SLC8A1/FOXF1/RIPOR2/MSX1/FLNC/BOC/CYP26B1/TPM1/PRDM6/PLEKHO1/ZEB1/TMOD2/CACNA1H/PDGFRA/XK/SORBS2/BHLHE41/NEK5/SHH/PLPP7/RORA/ADAM12/COMP/SOX6/QKI/B…	GO_BP
122	GO:0031960~response to corticosteroid	44	44/2754	162/18012	6.90437e-05	0.00140028	1.77638	ENSG00000168309/ENSG00000184347/ENSG00000164850/ENSG00000110092/ENSG00000163347/ENSG00000153162/ENSG00000113580/ENSG00000171791/ENSG00000155846/ENSG00000160307/ENSG00000119138/ENSG00000069535/ENSG00000090447/ENSG00000084774/ENSG00000176387/ENSG00000153094/ENSG00000156804/ENSG00000145147/ENSG00000124253/ENSG00000139515/ENSG00000070961/ENSG00000164463/ENSG00000187840/ENSG00000138772/ENSG00000204472…	FAM107A/SLIT3/GPER1/CCND1/CLDN1/BMP6/NR3C1/BCL2/PPARGC1B/S100B/KLF9/MAOB/TFAP4/CAD/HSD11B2/BCL2L11/FBXO32/SLIT2/PCK1/PDX1/ATP2B1/CREBRF/EIF4EBP1/ANXA3/AIF1/FOSL1/FOXO1/COL1A1/PCNA/DNMT3B/STC1/DDIT4/CDKN1A/AQP1/DUSP1/GSTP1/AKR1C3/SPARC/AREG/CYBB/CTSV/ABCC2/IL1RN/FOSB	GO_BP
123	GO:0034440~lipid oxidation	31	31/2754	101/18012	6.94181e-05	0.00140329	2.00742	ENSG00000171503/ENSG00000136044/ENSG00000004799/ENSG00000157184/ENSG00000122971/ENSG00000076555/ENSG00000161533/ENSG00000138029/ENSG00000145861/ENSG00000130766/ENSG00000110090/ENSG00000075239/ENSG00000167315/ENSG00000109819/ENSG00000005469/ENSG00000113790/ENSG00000117528/ENSG00000116171/ENSG00000117054/ENSG00000198721/ENSG00000139160/ENSG00000062282/ENSG00000112033/ENSG00000107537/ENSG00000115425…	ETFDH/APPL2/PDK4/CPT2/ACADS/ACACB/ACOX1/HADHB/C1QTNF2/SESN2/CPT1A/ACAT1/ACAA2/PPARGC1A/CROT/EHHADH/ABCD3/SCP2/ACADM/ECI2/ETFBKMT/DGAT2/PPARD/PHYH/PECR/BDH2/CYGB/FABP1/CRAT/APOD/TWIST1	GO_BP
124	GO:0002449~lymphocyte mediated immunity	61	61/2754	247/18012	7.10157e-05	0.00143007	1.61522	ENSG00000112936/ENSG00000127951/ENSG00000069974/ENSG00000158473/ENSG00000121807/ENSG00000139193/ENSG00000117322/ENSG00000079385/ENSG00000144381/ENSG00000010671/ENSG00000028277/ENSG00000120885/ENSG00000131019/ENSG00000026751/ENSG00000134321/ENSG00000163251/ENSG00000174371/ENSG00000153283/ENSG00000101665/ENSG00000116670/ENSG00000176919/ENSG00000015285/ENSG00000122122/ENSG00000254709/ENSG00000203710…	C7/FGL2/RAB27A/CD1D/CCR2/CD27/CR2/CEACAM1/HSPD1/BTK/POU2F2/CLU/ULBP3/SLAMF7/RSAD2/FZD5/EXO1/CD96/SMAD7/MAD2L2/C8G/WAS/SASH3/IGLL5/CR1/TNFSF13/GCNT3/IL23A/ATAD5/VAV1/TSTA3/FCGR2B/C1QA/B2M/TRPM4/SLA2/IL1R1/CADM1/PTPRC/LAG3/LGALS9/CD226/IL18/C1QC/CD28/ZP3/P2RX7/TLR8/CD8A/C1QB/C2/SLC11A1/PIK3R6/SLAMF6/LILRB1/FOXP3/KLRD1/SH2D1A/GZMB/C3/IL1B	GO_BP
125	GO:0014074~response to purine-containing compound	41	41/2754	148/18012	7.43146e-05	0.00147347	1.81184	ENSG00000103375/ENSG00000186642/ENSG00000169860/ENSG00000108405/ENSG00000155846/ENSG00000116473/ENSG00000239672/ENSG00000135124/ENSG00000151320/ENSG00000213366/ENSG00000084774/ENSG00000105851/ENSG00000172572/ENSG00000109819/ENSG00000120156/ENSG00000124253/ENSG00000120899/ENSG00000127914/ENSG00000138035/ENSG00000091138/ENSG00000086991/ENSG00000183023/ENSG00000175592/ENSG00000175591/ENSG00000108821…	AQP8/PDE2A/P2RY1/P2RX1/PPARGC1B/RAP1A/NME1/P2RX4/AKAP6/GSTM2/CAD/PIK3CG/PDE3A/PPARGC1A/TEK/PCK1/PTK2B/AKAP9/PNPT1/SLC26A3/NOX4/SLC8A1/FOSL1/P2RY2/COL1A1/DNMT3B/STC1/PER1/TRPM4/P2RX7/AQP1/DUSP1/SPARC/KCNJ11/AREG/AQP9/VGF/TRPM2/FOSB/IL1B/PKLR	GO_BP
126	GO:0030168~platelet activation	42	42/2754	153/18012	7.67486e-05	0.00150728	1.79538	ENSG00000169860/ENSG00000108405/ENSG00000186469/ENSG00000166501/ENSG00000088256/ENSG00000244734/ENSG00000197943/ENSG00000120063/ENSG00000105851/ENSG00000159176/ENSG00000079385/ENSG00000137486/ENSG00000166333/ENSG00000150995/ENSG00000150594/ENSG00000185532/ENSG00000156052/ENSG00000101335/ENSG00000102882/ENSG00000151012/ENSG00000137672/ENSG00000141506/ENSG00000108821/ENSG00000141968/ENSG00000259207…	P2RY1/P2RX1/GNG2/PRKCB/GNA11/HBB/PLCG2/GNA13/PIK3CG/CSRP1/CEACAM1/ARRB1/ILK/ITPR1/ADRA2A/PRKG1/GNAQ/MYL9/MAPK3/SLC7A11/TRPC6/PIK3R5/COL1A1/VAV1/ITGB3/F8/PDGFRA/AXL/TYRO3/DGKA/FERMT3/COMP/FLNA/SELP/PIK3R6/PDPN/SERPINE2/PLEK/F2RL2/COL1A2/VAV3/SAA1	GO_BP
127	GO:0035725~sodium ion transmembrane transport	39	39/2754	139/18012	8.1483e-05	0.00158026	1.83505	ENSG00000168447/ENSG00000146039/ENSG00000181804/ENSG00000177098/ENSG00000151150/ENSG00000170482/ENSG00000152642/ENSG00000158158/ENSG00000187446/ENSG00000137726/ENSG00000049759/ENSG00000089327/ENSG00000066230/ENSG00000144136/ENSG00000090020/ENSG00000115616/ENSG00000168003/ENSG00000198947/ENSG00000105711/ENSG00000145349/ENSG00000058668/ENSG00000183023/ENSG00000110881/ENSG00000064651/ENSG00000169174…	SCNN1B/SLC17A4/SLC9A9/SCN4B/ANK3/SLC23A1/GPD1L/CNNM4/CHP1/FXYD6/NEDD4L/FXYD5/SLC9A3/SLC20A1/SLC9A1/SLC9A2/SLC3A2/DMD/SCN1B/CAMK2D/ATP2B4/SLC8A1/ASIC1/SLC12A2/PCSK9/SLC9A3R1/SLC4A11/FXYD3/TRPM4/STOM/TESC/SLC9B2/ATP1A3/HECW2/TRPM5/SLC9A7/SCNN1A/TRPM2/SLC28A3	GO_BP
128	GO:0071236~cellular response to antibiotic	39	39/2754	139/18012	8.1483e-05	0.00158026	1.83505	ENSG00000173175/ENSG00000158828/ENSG00000183010/ENSG00000073417/ENSG00000145936/ENSG00000105976/ENSG00000136826/ENSG00000170962/ENSG00000081189/ENSG00000141570/ENSG00000170075/ENSG00000106462/ENSG00000126602/ENSG00000114346/ENSG00000090020/ENSG00000127955/ENSG00000120885/ENSG00000111602/ENSG00000170312/ENSG00000164938/ENSG00000147955/ENSG00000184349/ENSG00000103056/ENSG00000188906/ENSG00000137672…	ADCY5/PINK1/PYCR1/PDE8A/KCNMB1/MET/KLF4/PDGFD/MEF2C/CBX8/GPR37L1/EZH2/TRAP1/ECT2/SLC9A1/GNAI1/CLU/TIMELESS/CDK1/TP53INP1/SIGMAR1/EFNA5/SMPD3/LRRK2/TRPC6/DDX11/FOXO1/PCNA/AXL/FABP1/AQP1/CYP1B1/KLF2/PLA2G4F/CYBB/LCN2/PLA2G4A/SPHK1/TRPM2	GO_BP
129	GO:0042308~negative regulation of protein import into nucleus	8	2754-08-01	12/18012	8.19937e-05	0.00158029	4.3602	ENSG00000135218/ENSG00000187446/ENSG00000168734/ENSG00000154188/ENSG00000101311/ENSG00000135272/ENSG00000189058/ENSG00000171033	CD36/CHP1/PKIG/ANGPT1/FERMT1/MDFIC/APOD/PKIA	GO_BP
130	GO:1904590~negative regulation of protein import	8	2754-08-01	12/18012	8.19937e-05	0.00158029	4.3602	ENSG00000135218/ENSG00000187446/ENSG00000168734/ENSG00000154188/ENSG00000101311/ENSG00000135272/ENSG00000189058/ENSG00000171033	CD36/CHP1/PKIG/ANGPT1/FERMT1/MDFIC/APOD/PKIA	GO_BP
131	GO:1905517~macrophage migration	19	19/2754	51/18012	0.000103468	0.00195769	2.43658	ENSG00000271447/ENSG00000121807/ENSG00000135124/ENSG00000136160/ENSG00000174600/ENSG00000120899/ENSG00000184371/ENSG00000102882/ENSG00000153898/ENSG00000131981/ENSG00000129422/ENSG00000271503/ENSG00000106538/ENSG00000173531/ENSG00000240972/ENSG00000171860/ENSG00000169071/ENSG00000111199/ENSG00000173432	MMP28/CCR2/P2RX4/EDNRB/CMKLR1/PTK2B/CSF1/MAPK3/MCOLN2/LGALS3/MTUS1/CCL5/RARRES2/MST1/MIF/C3AR1/ROR2/TRPV4/SAA1	GO_BP
132	GO:0010975~regulation of neuron projection development	107	107/2754	497/18012	0.000110273	0.00207381	1.40807	ENSG00000104435/ENSG00000137872/ENSG00000105894/ENSG00000172260/ENSG00000065320/ENSG00000107864/ENSG00000198121/ENSG00000124772/ENSG00000107562/ENSG00000010319/ENSG00000115993/ENSG00000157193/ENSG00000136271/ENSG00000130449/ENSG00000136826/ENSG00000006327/ENSG00000130558/ENSG00000006740/ENSG00000182175/ENSG00000112175/ENSG00000081189/ENSG00000092421/ENSG00000116473/ENSG00000239672/ENSG00000049759…	STMN2/SEMA6D/PTN/NEGR1/NTN1/CPEB3/LPAR1/CPNE5/CXCL12/SEMA3G/TRAK2/LRP8/DDX56/ZSWIM6/KLF4/TNFRSF12A/OLFM1/ARHGAP44/RGMA/BMP5/MEF2C/SEMA6A/RAP1A/NME1/NEDD4L/NGFR/CHRNA3/EZH2/ITM2C/L1CAM/VEGFA/SLIT2/PLXNA1/PTK2B/APBB1/ILK/MAGI2/FEZ1/ZEB2/FKBP1B/LTK/NEURL1/WNT3/SPART/SCN1B/KLK6/ITPKA/PRKN/KIF13B/PLXNA2/EFNA5/RGS2/ZSWIM4/FZD1/TIAM1/LRRK2/P3H1/MAP1B/NDRG4/UST/SEMA4G/PTPRF/TRPC6/CDC20/ALKAL1/NDNF/SDK1/V…	GO_BP
133	GO:0048871~multicellular organismal homeostasis	104	104/2754	481/18012	0.000115133	0.00215215	1.41412	ENSG00000111846/ENSG00000168447/ENSG00000136044/ENSG00000197375/ENSG00000173175/ENSG00000062038/ENSG00000004799/ENSG00000154822/ENSG00000135218/ENSG00000157184/ENSG00000078804/ENSG00000104267/ENSG00000108187/ENSG00000109265/ENSG00000137265/ENSG00000076555/ENSG00000160685/ENSG00000005249/ENSG00000162104/ENSG00000105976/ENSG00000182636/ENSG00000099194/ENSG00000163347/ENSG00000125398/ENSG00000153162…	GCNT2/SCNN1B/APPL2/SLC22A5/ADCY5/CDH3/PDK4/PLCL2/CD36/CPT2/TP53INP2/CA2/PBLD/KIAA1211/IRF4/ACACB/ZBTB7B/PRKAR2B/ADCY9/MET/NDN/SCD/CLDN1/SOX9/BMP6/BCL2/PPARGC1B/CCR2/P2RX4/EDNRB/PLAC8/ABHD6/TUB/PRKACB/PPARGC1A/GPR3/EPAS1/VEGFA/CMKLR1/PTK2B/LEPR/LGR4/CDH23/CAV1/APLN/OXTR/HOMER1/NOX4/GRHL1/JCHAIN/GRHL3/S1PR1/CYP26B1/TNS2/SASH3/CEBPB/CSF1/APC/ACOT11/MAP2K6/FOXO1/CSF1R/ACHE/CD38/CYP4F12/ITGB3/MLXIPL/P…	GO_BP
134	GO:0006814~sodium ion transport	54	54/2754	216/18012	0.00012796	0.00234946	1.63508	ENSG00000168447/ENSG00000080493/ENSG00000197375/ENSG00000146039/ENSG00000181804/ENSG00000177098/ENSG00000151150/ENSG00000170482/ENSG00000152642/ENSG00000158158/ENSG00000118515/ENSG00000187446/ENSG00000137726/ENSG00000049759/ENSG00000135124/ENSG00000089327/ENSG00000066230/ENSG00000144136/ENSG00000090020/ENSG00000115616/ENSG00000007216/ENSG00000139209/ENSG00000168003/ENSG00000138074/ENSG00000197208…	SCNN1B/SLC4A4/SLC22A5/SLC17A4/SLC9A9/SCN4B/ANK3/SLC23A1/GPD1L/CNNM4/SGK1/CHP1/FXYD6/NEDD4L/P2RX4/FXYD5/SLC9A3/SLC20A1/SLC9A1/SLC9A2/SLC13A2/SLC38A4/SLC3A2/SLC5A6/SLC22A4/DMD/SCN1B/CAMK2D/ATP2B4/SLC8A1/ASIC1/SLC12A2/PCSK9/SLC9A3R1/FGF13/SLC4A11/PER1/FXYD3/TRPM4/STOM/TESC/P2RX7/SLC9B2/ATP1A3/PRSS8/HECW2/SLC6A8/TRPM5/SERPINE2/SLC9A7/SCNN1A/SLC13A3/TRPM2/SLC28A3	GO_BP
135	GO:0002920~regulation of humoral immune response	24	24/2754	73/18012	0.000136765	0.00245307	2.15024	ENSG00000112936/ENSG00000126759/ENSG00000117322/ENSG00000120885/ENSG00000155659/ENSG00000175899/ENSG00000000971/ENSG00000176919/ENSG00000203710/ENSG00000133710/ENSG00000072694/ENSG00000173372/ENSG00000183018/ENSG00000081237/ENSG00000156234/ENSG00000159189/ENSG00000188372/ENSG00000126353/ENSG00000173369/ENSG00000166278/ENSG00000171860/ENSG00000243649/ENSG00000125730/ENSG00000125538	C7/CFP/CR2/CLU/VSIG4/A2M/CFH/C8G/CR1/SPINK5/FCGR2B/C1QA/SPNS2/PTPRC/CXCL13/C1QC/ZP3/CCR7/C1QB/C2/C3AR1/CFB/C3/IL1B	GO_BP
136	GO:0001818~negative regulation of cytokine production	68	68/2754	289/18012	0.000138265	0.00246572	1.5389	ENSG00000136044/ENSG00000062038/ENSG00000150593/ENSG00000171916/ENSG00000096384/ENSG00000136826/ENSG00000048052/ENSG00000107738/ENSG00000181751/ENSG00000115590/ENSG00000171522/ENSG00000100292/ENSG00000100784/ENSG00000079385/ENSG00000137486/ENSG00000165795/ENSG00000101695/ENSG00000174600/ENSG00000010671/ENSG00000170298/ENSG00000122641/ENSG00000205213/ENSG00000164251/ENSG00000070961/ENSG00000153283…	APPL2/CDH3/PDCD4/LGALS9C/HSP90AB1/KLF4/HDAC9/VSIR/C5orf30/IL1R2/PTGER4/HMOX1/RPS6KA5/CEACAM1/ARRB1/NDRG2/RNF125/CMKLR1/BTK/LGALS9B/INHBA/LGR4/F2RL1/ATP2B1/CD96/VSIG4/SMAD7/TRAIP/CPTP/SLAMF1/NCKAP1L/CD33/IL23A/ANGPT1/C1QTNF3/ERBIN/SYT11/FCGR2B/AXL/LEF1/TLR6/SSC5D/NLRC3/PTPRC/LAG3/LGALS9/BANK1/PTPRS/FGFR1/TLR8/FFAR4/GSTP1/PTPN22/APOD/SLC11A1/LILRB1/HERC5/MC1R/KLF2/ARG2/TWIST1/GPNMB/FOXP3/LAPTM4B/SR…	GO_BP
137	GO:0050918~positive chemotaxis	23	23/2754	69/18012	0.000148029	0.00259511	2.1801	ENSG00000107562/ENSG00000171951/ENSG00000105976/ENSG00000172349/ENSG00000275718/ENSG00000112715/ENSG00000164251/ENSG00000164171/ENSG00000138685/ENSG00000170989/ENSG00000131981/ENSG00000154188/ENSG00000271503/ENSG00000091879/ENSG00000140285/ENSG00000169429/ENSG00000125378/ENSG00000240972/ENSG00000119630/ENSG00000136235/ENSG00000114251/ENSG00000169245/ENSG00000173432	CXCL12/SCG2/MET/IL16/CCL15/VEGFA/F2RL1/ITGA2/FGF2/S1PR1/LGALS3/ANGPT1/CCL5/ANGPT2/FGF7/CXCL8/BMP4/MIF/PGF/GPNMB/WNT5A/CXCL10/SAA1	GO_BP
138	GO:0070098~chemokine-mediated signaling pathway	27	27/2754	87/18012	0.00016188	0.0027984	2.02975	ENSG00000107562/ENSG00000184347/ENSG00000181374/ENSG00000213088/ENSG00000121807/ENSG00000117115/ENSG00000275718/ENSG00000172724/ENSG00000145147/ENSG00000174600/ENSG00000120899/ENSG00000137077/ENSG00000172156/ENSG00000163739/ENSG00000271503/ENSG00000163734/ENSG00000156234/ENSG00000169429/ENSG00000126353/ENSG00000169248/ENSG00000081041/ENSG00000163735/ENSG00000160791/ENSG00000124875/ENSG00000115009…	CXCL12/SLIT3/CCL13/ACKR1/CCR2/PADI2/CCL15/CCL19/SLIT2/CMKLR1/PTK2B/CCL21/CCL11/CXCL1/CCL5/CXCL3/CXCL13/CXCL8/CCR7/CXCL11/CXCL2/CXCL5/CCR5/CXCL6/CCL20/CCL24/CXCL10	GO_BP
139	GO:0010464~regulation of mesenchymal cell proliferation	14	14/2754	33/18012	0.000168852	0.00290276	2.77467	ENSG00000105894/ENSG00000105989/ENSG00000125398/ENSG00000066468/ENSG00000136997/ENSG00000128573/ENSG00000112715/ENSG00000103241/ENSG00000148516/ENSG00000164690/ENSG00000077782/ENSG00000125378/ENSG00000114251/ENSG00000116132	PTN/WNT2/SOX9/FGFR2/MYC/FOXP2/VEGFA/FOXF1/ZEB1/SHH/FGFR1/BMP4/WNT5A/PRRX1	GO_BP
140	GO:0042326~negative regulation of phosphorylation	98	98/2754	453/18012	0.000175024	0.00298406	1.4149	ENSG00000135549/ENSG00000147883/ENSG00000150593/ENSG00000129474/ENSG00000141052/ENSG00000135842/ENSG00000048540/ENSG00000114166/ENSG00000166311/ENSG00000158828/ENSG00000152642/ENSG00000162407/ENSG00000108187/ENSG00000164850/ENSG00000005249/ENSG00000101255/ENSG00000136826/ENSG00000140832/ENSG00000092421/ENSG00000187446/ENSG00000154277/ENSG00000136997/ENSG00000276023/ENSG00000159733/ENSG00000090447…	PKIB/CDKN2B/PDCD4/AJUBA/MYOCD/FAM129A/LMO3/KAT2B/SMPD1/PINK1/GPD1L/PLPP3/PBLD/GPER1/PRKAR2B/TRIB3/KLF4/MARVELD3/SEMA6A/CHP1/UCHL1/MYC/DUSP14/ZFYVE28/TFAP4/XDH/BDKRB1/CEACAM1/ARRB1/PPARGC1A/NDRG2/CCNB1/BDKRB2/SLIT2/ILK/INHBA/PDE4D/PLK1/F2RL1/PTPRR/CAV1/PID1/DMD/PRKN/FOXM1/ENPP1/INCA1/PRR5L/RGS2/RASSF2/SMAD7/GNAQ/LRRK2/LAX1/APC/CAMK2N1/PKIG/RPS6KA6/LIF/PRKDC/FOXO1/ANGPT1/GMFG/FBLN1/CBFA2T3/SLC9A3R1…	GO_BP
141	GO:0006957~complement activation, alternative pathway	9	2754-09-01	16/18012	0.000184865	0.00309238	3.67892	ENSG00000112936/ENSG00000197766/ENSG00000126759/ENSG00000155659/ENSG00000000971/ENSG00000176919/ENSG00000203710/ENSG00000243649/ENSG00000125730	C7/CFD/CFP/VSIG4/CFH/C8G/CR1/CFB/C3	GO_BP
142	GO:0071605~monocyte chemotactic protein-1 production	9	2754-09-01	16/18012	0.000184865	0.00309238	3.67892	ENSG00000153898/ENSG00000082196/ENSG00000112851/ENSG00000168961/ENSG00000084207/ENSG00000189058/ENSG00000122691/ENSG00000111199/ENSG00000125538	MCOLN2/C1QTNF3/ERBIN/LGALS9/GSTP1/APOD/TWIST1/TRPV4/IL1B	GO_BP
143	GO:0071637~regulation of monocyte chemotactic protein-1 production	9	2754-09-01	16/18012	0.000184865	0.00309238	3.67892	ENSG00000153898/ENSG00000082196/ENSG00000112851/ENSG00000168961/ENSG00000084207/ENSG00000189058/ENSG00000122691/ENSG00000111199/ENSG00000125538	MCOLN2/C1QTNF3/ERBIN/LGALS9/GSTP1/APOD/TWIST1/TRPV4/IL1B	GO_BP
144	GO:0048146~positive regulation of fibroblast proliferation	18	18/2754	49/18012	0.000192415	0.00320141	2.40256	ENSG00000105989/ENSG00000170962/ENSG00000136997/ENSG00000135446/ENSG00000134057/ENSG00000101412/ENSG00000094804/ENSG00000162733/ENSG00000145386/ENSG00000253729/ENSG00000134853/ENSG00000124762/ENSG00000240583/ENSG00000240972/ENSG00000135744/ENSG00000114251/ENSG00000176170/ENSG00000124882	WNT2/PDGFD/MYC/CDK4/CCNB1/E2F1/CDC6/DDR2/CCNA2/PRKDC/PDGFRA/CDKN1A/AQP1/MIF/AGT/WNT5A/SPHK1/EREG	GO_BP
145	GO:0007093~mitotic cell cycle checkpoint	43	43/2754	164/18012	0.000196609	0.00324509	1.71484	ENSG00000147883/ENSG00000071539/ENSG00000169372/ENSG00000110092/ENSG00000123374/ENSG00000124766/ENSG00000053254/ENSG00000169679/ENSG00000087586/ENSG00000134057/ENSG00000154920/ENSG00000101412/ENSG00000075218/ENSG00000166851/ENSG00000094804/ENSG00000164109/ENSG00000170312/ENSG00000165891/ENSG00000126226/ENSG00000131747/ENSG00000012048/ENSG00000143816/ENSG00000117724/ENSG00000184445/ENSG00000116670…	CDKN2B/TRIP13/CRADD/CCND1/CDK2/SOX4/FOXN3/BUB1/AURKA/CCNB1/EME1/E2F1/GTSE1/PLK1/CDC6/MAD2L1/CDK1/E2F7/PCID2/TOP2A/BRCA1/WNT9A/CENPF/KNTC1/MAD2L2/TICRR/SPDL1/BUB1B/APC/CDC25C/PRMT1/TTK/CDT1/PRKDC/CDC20/BLM/PCNA/AURKB/CDKN1A/CLSPN/ARID3A/DUSP1/CHFR	GO_BP
146	GO:0002367~cytokine production involved in immune response	30	30/2754	102/18012	0.000210734	0.00345071	1.92362	ENSG00000100604/ENSG00000135218/ENSG00000164342/ENSG00000157404/ENSG00000121807/ENSG00000100292/ENSG00000144381/ENSG00000010671/ENSG00000164251/ENSG00000165732/ENSG00000134321/ENSG00000163251/ENSG00000153283/ENSG00000101665/ENSG00000122122/ENSG00000102882/ENSG00000154188/ENSG00000166710/ENSG00000130529/ENSG00000115594/ENSG00000150637/ENSG00000150782/ENSG00000018280/ENSG00000104972/ENSG00000240972…	CHGA/CD36/TLR3/KIT/CCR2/HMOX1/HSPD1/BTK/F2RL1/DDX21/RSAD2/FZD5/CD96/SMAD7/SASH3/MAPK3/ANGPT1/B2M/TRPM4/IL1R1/CD226/IL18/SLC11A1/LILRB1/MIF/SPON2/FOXP3/NOD2/WNT5A/IL1B	GO_BP
147	GO:0048872~homeostasis of number of cells	59	59/2754	246/18012	0.000216468	0.00353526	1.56861	ENSG00000119919/ENSG00000125398/ENSG00000081189/ENSG00000171791/ENSG00000198125/ENSG00000157404/ENSG00000176928/ENSG00000121807/ENSG00000146918/ENSG00000106462/ENSG00000100292/ENSG00000153094/ENSG00000145220/ENSG00000135905/ENSG00000116016/ENSG00000112715/ENSG00000185811/ENSG00000122641/ENSG00000205213/ENSG00000166086/ENSG00000073536/ENSG00000101265/ENSG00000141682/ENSG00000144161/ENSG00000123338…	NKX2-3/SOX9/MEF2C/BCL2/MB/KIT/GCNT4/CCR2/NCAPG2/EZH2/HMOX1/BCL2L11/LYAR/DOCK10/EPAS1/VEGFA/IKZF1/INHBA/LGR4/JAM3/NLE1/RASSF2/PMAIP1/ZC3H8/NCKAP1L/TAL1/SASH3/CSF1/SLC7A11/KITLG/PRMT1/HCLS1/PIK3CD/MIR17HG/GPR183/TNFRSF13C/TSC22D3/AXL/B2M/TRIM10/SPNS2/AKT3/LGALS9/TGFBR3/CCR7/P2RX7/SOX6/BMP4/HSPA1A/NOV/GATA2/MIF/KLF2/SIT1/MAFB/TNFSF14/FOXP3/HOXA5/CXCL6	GO_BP
148	GO:1901655~cellular response to ketone	28	28/2754	93/18012	0.000219352	0.00356361	1.96912	ENSG00000173175/ENSG00000186469/ENSG00000136826/ENSG00000113580/ENSG00000151632/ENSG00000119138/ENSG00000135446/ENSG00000090447/ENSG00000171522/ENSG00000127955/ENSG00000156804/ENSG00000124253/ENSG00000104814/ENSG00000070961/ENSG00000184349/ENSG00000169083/ENSG00000187840/ENSG00000150907/ENSG00000088305/ENSG00000125384/ENSG00000168209/ENSG00000122420/ENSG00000240583/ENSG00000196139/ENSG00000127528…	ADCY5/GNG2/KLF4/NR3C1/AKR1C2/KLF9/CDK4/TFAP4/PTGER4/GNAI1/FBXO32/PCK1/MAP4K1/ATP2B1/EFNA5/AR/EIF4EBP1/FOXO1/DNMT3B/PTGER2/DDIT4/PTGFR/AQP1/AKR1C3/KLF2/AKR1B1/SPP1/ABCC2	GO_BP
149	GO:0002718~regulation of cytokine production involved in immune response	26	26/2754	84/18012	0.000222629	0.00359801	2.02438	ENSG00000135218/ENSG00000164342/ENSG00000121807/ENSG00000100292/ENSG00000010671/ENSG00000164251/ENSG00000165732/ENSG00000134321/ENSG00000163251/ENSG00000153283/ENSG00000101665/ENSG00000122122/ENSG00000102882/ENSG00000154188/ENSG00000166710/ENSG00000130529/ENSG00000115594/ENSG00000150637/ENSG00000150782/ENSG00000104972/ENSG00000240972/ENSG00000159674/ENSG00000049768/ENSG00000167207/ENSG00000114251…	CD36/TLR3/CCR2/HMOX1/BTK/F2RL1/DDX21/RSAD2/FZD5/CD96/SMAD7/SASH3/MAPK3/ANGPT1/B2M/TRPM4/IL1R1/CD226/IL18/LILRB1/MIF/SPON2/FOXP3/NOD2/WNT5A/IL1B	GO_BP
150	GO:1900180~regulation of protein localization to nucleus	33	33/2754	117/18012	0.000249482	0.0039598	1.8447	ENSG00000133083/ENSG00000135218/ENSG00000130826/ENSG00000112578/ENSG00000204614/ENSG00000146731/ENSG00000166869/ENSG00000187446/ENSG00000130766/ENSG00000064300/ENSG00000132341/ENSG00000166226/ENSG00000114346/ENSG00000166197/ENSG00000075218/ENSG00000166851/ENSG00000170312/ENSG00000170390/ENSG00000106571/ENSG00000137699/ENSG00000168734/ENSG00000180353/ENSG00000128342/ENSG00000154188/ENSG00000101311…	DCLK1/CD36/DKC1/BYSL/TRIM40/CCT6A/CHP2/CHP1/SESN2/NGFR/RAN/CCT2/ECT2/NOLC1/GTSE1/PLK1/CDK1/DCLK2/GLI3/TRIM29/PKIG/HCLS1/LIF/ANGPT1/FERMT1/MDFIC/SHH/RASSF5/BMP4/FLNA/APOD/PKIA/TERT	GO_BP
151	GO:0030308~negative regulation of cell growth	47	47/2754	186/18012	0.000260185	0.00406173	1.65266	ENSG00000137872/ENSG00000065320/ENSG00000022267/ENSG00000184347/ENSG00000010319/ENSG00000204614/ENSG00000171791/ENSG00000092421/ENSG00000197380/ENSG00000169418/ENSG00000109846/ENSG00000130766/ENSG00000100739/ENSG00000134533/ENSG00000145147/ENSG00000145088/ENSG00000166313/ENSG00000139567/ENSG00000122641/ENSG00000111012/ENSG00000108379/ENSG00000133104/ENSG00000134222/ENSG00000197594/ENSG00000116741…	SEMA6D/NTN1/FHL1/SLIT3/SEMA3G/TRIM40/BCL2/SEMA6A/DACT3/NPR1/CRYAB/SESN2/BDKRB1/RERG/SLIT2/EAF2/APBB1/ACVRL1/INHBA/CYP27B1/WNT3/SPART/PSRC1/ENPP1/RGS2/PPARD/CDHR2/WFDC1/MSX1/SEMA4G/FGF13/SOX17/FRZB/CDKN1A/CDA/PTPRS/SFRP2/SEMA3B/HSPA1A/NOV/RTN4R/AGT/CCDC85B/CDKN2A/SERPINE2/SPP1/WNT5A	GO_BP
152	GO:0034121~regulation of toll-like receptor signaling pathway	22	22/2754	67/18012	0.000261139	0.00406173	2.14756	ENSG00000136044/ENSG00000135218/ENSG00000164342/ENSG00000137265/ENSG00000198961/ENSG00000205213/ENSG00000164251/ENSG00000105974/ENSG00000134321/ENSG00000075240/ENSG00000174125/ENSG00000092445/ENSG00000174130/ENSG00000162676/ENSG00000105426/ENSG00000154589/ENSG00000170458/ENSG00000187554/ENSG00000134242/ENSG00000023445/ENSG00000186074/ENSG00000012223	APPL2/CD36/TLR3/IRF4/PJA2/LGR4/F2RL1/CAV1/RSAD2/GRAMD4/TLR1/TYRO3/TLR6/GFI1/PTPRS/LY96/CD14/TLR5/PTPN22/BIRC3/CD300LF/LTF	GO_BP
153	GO:0042108~positive regulation of cytokine biosynthetic process	22	22/2754	67/18012	0.000261139	0.00406173	2.14756	ENSG00000164342/ENSG00000137265/ENSG00000121807/ENSG00000100292/ENSG00000196664/ENSG00000105246/ENSG00000197471/ENSG00000174125/ENSG00000131016/ENSG00000159958/ENSG00000198851/ENSG00000174130/ENSG00000010610/ENSG00000081237/ENSG00000227507/ENSG00000178562/ENSG00000101916/ENSG00000115008/ENSG00000165168/ENSG00000114251/ENSG00000124882/ENSG00000125538	TLR3/IRF4/CCR2/HMOX1/TLR7/EBI3/SPN/TLR1/AKAP12/TNFRSF13C/CD3E/TLR6/CD4/PTPRC/LTB/CD28/TLR8/IL1A/CYBB/WNT5A/EREG/IL1B	GO_BP
154	GO:0098868~bone growth	17	17/2754	46/18012	0.000264755	0.00409743	2.41707	ENSG00000066468/ENSG00000168077/ENSG00000116678/ENSG00000162733/ENSG00000103056/ENSG00000132561/ENSG00000173068/ENSG00000165816/ENSG00000120149/ENSG00000187955/ENSG00000114270/ENSG00000159167/ENSG00000111799/ENSG00000105664/ENSG00000132031/ENSG00000196739/ENSG00000072840	FGFR2/SCARA3/LEPR/DDR2/SMPD3/MATN2/BNC2/VWA2/MSX2/COL14A1/COL7A1/STC1/COL12A1/COMP/MATN3/COL27A1/EVC	GO_BP
155	GO:0003158~endothelium development	35	35/2754	127/18012	0.000269011	0.00414264	1.80245	ENSG00000105894/ENSG00000186642/ENSG00000159307/ENSG00000184113/ENSG00000105976/ENSG00000163347/ENSG00000153162/ENSG00000116473/ENSG00000101445/ENSG00000158125/ENSG00000079385/ENSG00000112715/ENSG00000139567/ENSG00000113448/ENSG00000164251/ENSG00000157168/ENSG00000114790/ENSG00000169710/ENSG00000170989/ENSG00000106397/ENSG00000148516/ENSG00000151388/ENSG00000159167/ENSG00000164736/ENSG00000105426…	PTN/PDE2A/SCUBE1/CLDN5/MET/CLDN1/BMP6/RAP1A/PPP1R16B/XDH/CEACAM1/VEGFA/ACVRL1/PDE4D/F2RL1/NRG1/ARHGEF26/FASN/S1PR1/PLOD3/ZEB1/ADAMTS12/STC1/SOX17/PTPRS/COL4A4/BMP4/ATOH8/PDPN/RDX/PROX1/MESP1/GSTM3/CXCL10/IL1B	GO_BP
156	GO:0002577~regulation of antigen processing and presentation	10	2754-10-01	20/18012	0.000289142	0.00438732	3.27015	ENSG00000127951/ENSG00000172724/ENSG00000137077/ENSG00000015285/ENSG00000072694/ENSG00000126353/ENSG00000241106/ENSG00000204252/ENSG00000018280/ENSG00000167207	FGL2/CCL19/CCL21/WAS/FCGR2B/CCR7/HLA-DOB/HLA-DOA/SLC11A1/NOD2	GO_BP
157	GO:0099024~plasma membrane invagination	20	20/2754	59/18012	0.00030448	0.00456425	2.21705	ENSG00000136044/ENSG00000135218/ENSG00000110934/ENSG00000148180/ENSG00000164251/ENSG00000163219/ENSG00000164171/ENSG00000100092/ENSG00000123338/ENSG00000254709/ENSG00000204472/ENSG00000155849/ENSG00000178999/ENSG00000072694/ENSG00000165029/ENSG00000144366/ENSG00000179348/ENSG00000169896/ENSG00000125730/ENSG00000019169	APPL2/CD36/BIN2/GSN/F2RL1/ARHGAP25/ITGA2/SH3BP1/NCKAP1L/IGLL5/AIF1/ELMO1/AURKB/FCGR2B/ABCA1/GULP1/GATA2/ITGAM/C3/MARCO	GO_BP
158	GO:0032535~regulation of cellular component size	81	81/2754	367/18012	0.000320141	0.00474175	1.4435	ENSG00000137872/ENSG00000065320/ENSG00000107562/ENSG00000166821/ENSG00000010319/ENSG00000006747/ENSG00000156113/ENSG00000109265/ENSG00000096384/ENSG00000163431/ENSG00000006327/ENSG00000167705/ENSG00000130558/ENSG00000165410/ENSG00000092421/ENSG00000183856/ENSG00000172661/ENSG00000135446/ENSG00000106299/ENSG00000221955/ENSG00000173898/ENSG00000242498/ENSG00000198910/ENSG00000112715/ENSG00000145147…	SEMA6D/NTN1/CXCL12/PEX11A/SEMA3G/SCIN/KCNMA1/KIAA1211/HSP90AB1/LMOD1/TNFRSF12A/RILP/OLFM1/CFL2/SEMA6A/IQGAP3/WASHC2C/CDK4/WASL/SLC12A8/SPTBN2/ARPIN/L1CAM/VEGFA/SLIT2/GSN/PTK2B/ILK/PLS1/CDHR5/F2RL1/ACTR3B/WNT3/CCL21/LIMA1/SPART/EFNA5/IQGAP2/CDHR2/SH3BP1/MAP1B/VILL/NCKAP1L/ARHGAP28/WAS/RAB3B/SEMA4G/HCLS1/TMOD2/CCL11/GMFG/SLC12A2/CDC42EP3/PLEKHH2/SLC9A3R1/FGF13/VAV1/RET/XK/HCK/AVIL/SPTBN5/EVL/AKT3/P…	GO_BP
159	GO:0009914~hormone transport	73	73/2754	324/18012	0.000327663	0.00484161	1.47359	ENSG00000100604/ENSG00000173175/ENSG00000169860/ENSG00000146469/ENSG00000124205/ENSG00000075073/ENSG00000164850/ENSG00000101187/ENSG00000153162/ENSG00000116473/ENSG00000124766/ENSG00000080644/ENSG00000110090/ENSG00000075142/ENSG00000137486/ENSG00000010671/ENSG00000122641/ENSG00000149577/ENSG00000150995/ENSG00000119782/ENSG00000171388/ENSG00000197696/ENSG00000123612/ENSG00000150594/ENSG00000185345…	CHGA/ADCY5/P2RY1/VIP/EDN3/TACR2/GPER1/SLCO4A1/BMP6/RAP1A/SOX4/CHRNA3/CPT1A/SRI/ARRB1/BTK/INHBA/SIDT2/ITPR1/FKBP1B/APLN/NMB/ACVR1C/ADRA2A/PRKN/C1QTNF12/PDX1/EFNA5/TIAM1/SMPD3/PPARD/STX1A/SLC44A4/MYO5A/IL11/LIF/LTBP4/C1QTNF3/CD38/CCL5/TRPM4/SLC2A1/KCNS3/TFR2/VSNL1/FOXA2/FGFR1/FFAR4/NNAT/SLC9B2/NOV/FAM3D/KCNJ11/AGT/SYT7/CACNA2D2/SPP1/CPLX1/CPE/OSM/PCLO/RASL10B/ABCC2/TRPV4/TNFSF11/DOC2B/IL1RN/VGF/INH…	GO_BP
160	GO:0001701~in utero embryonic development	82	82/2754	373/18012	0.00033653	0.00492381	1.43782	ENSG00000187091/ENSG00000157184/ENSG00000086696/ENSG00000178537/ENSG00000112578/ENSG00000105989/ENSG00000108773/ENSG00000162104/ENSG00000163683/ENSG00000112175/ENSG00000066468/ENSG00000125845/ENSG00000146918/ENSG00000120063/ENSG00000103494/ENSG00000196584/ENSG00000101115/ENSG00000068650/ENSG00000183508/ENSG00000112559/ENSG00000153094/ENSG00000107282/ENSG00000133316/ENSG00000134057/ENSG00000116016…	PLCD1/CPT2/HSD17B2/SLC25A20/BYSL/WNT2/KAT2A/ADCY9/SMIM14/BMP5/FGFR2/BMP2/NCAPG2/GNA13/RPGRIP1L/XRCC2/SALL4/ATP11A/FAM46C/MDFI/BCL2L11/APBA1/WDR74/CCNB1/EPAS1/VEGFA/NEK2/EIF2S2/ACVRL1/ZNF568/PTPRR/RXRA/NLE1/HM13/BRCA2/E2F7/FZD5/CAPN2/PLCD3/GINS1/CCNB1IP1/FOXF1/AR/PSPH/MSX1/MFNG/GLI3/RSPO3/STIL/CEBPB/TPM1/ASF1B/PLOD3/FOSL1/PRMT1/ZFPM2/SNAI1/LIF/ANGPT1/JAG2/PDGFRA/GINS4/SOX17/LEF1/PHLDA2/FGFR1/ASCL2…	GO_BP
161	GO:0046879~hormone secretion	71	71/2754	314/18012	0.000351935	0.00509116	1.47886	ENSG00000100604/ENSG00000173175/ENSG00000169860/ENSG00000146469/ENSG00000124205/ENSG00000075073/ENSG00000164850/ENSG00000153162/ENSG00000116473/ENSG00000124766/ENSG00000080644/ENSG00000110090/ENSG00000075142/ENSG00000137486/ENSG00000010671/ENSG00000122641/ENSG00000149577/ENSG00000150995/ENSG00000119782/ENSG00000171388/ENSG00000197696/ENSG00000123612/ENSG00000150594/ENSG00000185345/ENSG00000184163…	CHGA/ADCY5/P2RY1/VIP/EDN3/TACR2/GPER1/BMP6/RAP1A/SOX4/CHRNA3/CPT1A/SRI/ARRB1/BTK/INHBA/SIDT2/ITPR1/FKBP1B/APLN/NMB/ACVR1C/ADRA2A/PRKN/C1QTNF12/PDX1/EFNA5/TIAM1/SMPD3/PPARD/STX1A/SLC44A4/MYO5A/IL11/LIF/LTBP4/C1QTNF3/CD38/CCL5/TRPM4/SLC2A1/KCNS3/TFR2/VSNL1/FOXA2/FGFR1/FFAR4/NNAT/SLC9B2/NOV/FAM3D/KCNJ11/AGT/SYT7/CACNA2D2/SPP1/CPLX1/CPE/OSM/PCLO/RASL10B/TRPV4/TNFSF11/DOC2B/IL1RN/VGF/INHBB/BRSK2/NMU/N…	GO_BP
162	GO:0048333~mesodermal cell differentiation	14	14/2754	35/18012	0.00035401	0.00509741	2.61612	ENSG00000064655/ENSG00000077943/ENSG00000136826/ENSG00000066468/ENSG00000122641/ENSG00000164171/ENSG00000103241/ENSG00000162367/ENSG00000259207/ENSG00000164736/ENSG00000077782/ENSG00000125378/ENSG00000145423/ENSG00000166823	EYA2/ITGA8/KLF4/FGFR2/INHBA/ITGA2/FOXF1/TAL1/ITGB3/SOX17/FGFR1/BMP4/SFRP2/MESP1	GO_BP
163	GO:0048066~developmental pigmentation	17	17/2754	47/18012	0.000356251	0.0051153	2.36564	ENSG00000124205/ENSG00000088256/ENSG00000069974/ENSG00000081189/ENSG00000171791/ENSG00000157404/ENSG00000136160/ENSG00000153094/ENSG00000169554/ENSG00000197594/ENSG00000106571/ENSG00000197535/ENSG00000049130/ENSG00000183018/ENSG00000138795/ENSG00000187098/ENSG00000101850	EDN3/GNA11/RAB27A/MEF2C/BCL2/KIT/EDNRB/BCL2L11/ZEB2/ENPP1/GLI3/MYO5A/KITLG/SPNS2/LEF1/MITF/GPR143	GO_BP
164	GO:0051260~protein homooligomerization	78	78/2754	352/18012	0.000359829	0.00512762	1.44927	ENSG00000168079/ENSG00000136044/ENSG00000108405/ENSG00000159307/ENSG00000076555/ENSG00000198523/ENSG00000211445/ENSG00000163347/ENSG00000107815/ENSG00000105369/ENSG00000158270/ENSG00000101782/ENSG00000007312/ENSG00000145861/ENSG00000109846/ENSG00000198513/ENSG00000135124/ENSG00000108852/ENSG00000128059/ENSG00000110090/ENSG00000100292/ENSG00000075239/ENSG00000104756/ENSG00000114346/ENSG00000182199…	SCARA5/APPL2/P2RX1/SCUBE1/ACACB/PLN/GPX3/CLDN1/TWNK/CD79A/COLEC12/RIOK3/CD79B/C1QTNF2/CRYAB/ATL1/P2RX4/MPP2/PPAT/CPT1A/HMOX1/ACAT1/KCTD9/ECT2/SHMT2/BCL2L11/CLU/SLC1A1/PNPT1/CAV1/MARCKS/RXRA/HM13/AQP11/SIGMAR1/ITLN1/BMF/SMPD3/TRPA1/RIPOR2/FGFRL1/TMEM120A/APC/VWA2/POLQ/PRMT1/ASIC1/SLC1A5/BLM/KCTD12/CD3E/SYT11/CD247/B2M/TRPM4/KCND3/STEAP4/KCTD14/SPTBN5/KCNS3/STOM/CD3G/EVL/CDA/AKR1C1/HSF4/GALNT8/CD3D…	GO_BP
165	GO:0032060~bleb assembly	7	2754-07-01	11/18012	0.000361891	0.00512762	4.16201	ENSG00000198121/ENSG00000011426/ENSG00000065534/ENSG00000134531/ENSG00000089041/ENSG00000109099/ENSG00000142227	LPAR1/ANLN/MYLK/EMP1/P2RX7/PMP22/EMP3	GO_BP
166	GO:0072593~reactive oxygen species metabolic process	64	64/2754	277/18012	0.000364034	0.00514623	1.51112	ENSG00000204936/ENSG00000004799/ENSG00000135218/ENSG00000117592/ENSG00000158828/ENSG00000069974/ENSG00000096384/ENSG00000136826/ENSG00000211445/ENSG00000244734/ENSG00000171791/ENSG00000109846/ENSG00000130766/ENSG00000135124/ENSG00000069535/ENSG00000126602/ENSG00000158125/ENSG00000120899/ENSG00000120885/ENSG00000123131/ENSG00000164251/ENSG00000105974/ENSG00000153823/ENSG00000188536/ENSG00000140092…	CD177/PDK4/CD36/PRDX6/PINK1/RAB27A/HSP90AB1/KLF4/GPX3/HBB/BCL2/CRYAB/SESN2/P2RX4/MAOB/TRAP1/XDH/PTK2B/CLU/PRDX4/F2RL1/CAV1/PID1/HBA2/FBLN5/PRKN/FOXM1/NCF1C/NOX4/EPHX2/NCF1/PMAIP1/BRCA1/ATP2B4/PTGIS/BST1/LRRK2/AIF1/HK2/NQO2/FOXO1/NRROS/VAV1/DDIT4/CDKN1A/TLR6/RORA/SLC7A2/P2RX7/GSTP1/AKR1C3/MMP3/NCF4/TFAP2A/CYP1B1/KLF2/AGT/ARG2/CYBB/ITGAM/IFI6/BMP7/IL1B/MPV17L	GO_BP
167	GO:0006066~alcohol metabolic process	80	80/2754	364/18012	0.000398282	0.00552962	1.43743	ENSG00000197165/ENSG00000196616/ENSG00000135437/ENSG00000187091/ENSG00000169860/ENSG00000154822/ENSG00000042445/ENSG00000138193/ENSG00000138744/ENSG00000117682/ENSG00000073737/ENSG00000166311/ENSG00000196502/ENSG00000248144/ENSG00000076555/ENSG00000164850/ENSG00000198074/ENSG00000197943/ENSG00000099194/ENSG00000153162/ENSG00000112175/ENSG00000151632/ENSG00000125845/ENSG00000166391/ENSG00000132341…	SULT1A2/ADH1B/RDH5/PLCD1/P2RY1/PLCL2/RETSAT/PLCE1/NAAA/DHDDS/DHRS9/SMPD1/SULT1A1/ADH1C/ACACB/GPER1/AKR1B10/PLCG2/SCD/BMP6/BMP5/AKR1C2/BMP2/MOGAT2/RAN/ACAA2/SULT1B1/PCK1/OSBPL1A/PTK2B/LEPR/SEC14L2/SORD/CYP27B1/RXRA/LIMA1/IMPA1/ITPKA/APOBR/CLCN2/PLCD3/DHCR7/EPHX2/SQLE/VDR/FGF2/DGAT2/SGPP1/PLCD4/PPARD/ADH6/FASN/PECR/ACSS2/CACNA1H/VLDLR/PCSK9/SULT2B1/INPP5J/IMPA2/ABCA1/PLCL1/GALK1/PLD4/CES1/GFI1/AKR1…	GO_BP
168	GO:0031346~positive regulation of cell projection organization	83	83/2754	381/18012	0.000420366	0.00574623	1.42479	ENSG00000104435/ENSG00000105894/ENSG00000172260/ENSG00000065320/ENSG00000107864/ENSG00000198121/ENSG00000124772/ENSG00000107562/ENSG00000157193/ENSG00000108773/ENSG00000136271/ENSG00000006327/ENSG00000112175/ENSG00000116473/ENSG00000165689/ENSG00000239672/ENSG00000011426/ENSG00000157404/ENSG00000049759/ENSG00000064300/ENSG00000099864/ENSG00000106462/ENSG00000106299/ENSG00000172724/ENSG00000198910…	STMN2/PTN/NEGR1/NTN1/CPEB3/LPAR1/CPNE5/CXCL12/LRP8/KAT2A/DDX56/TNFRSF12A/BMP5/RAP1A/SDCCAG3/NME1/ANLN/KIT/NEDD4L/NGFR/PALM/EZH2/WASL/CCL19/L1CAM/VEGFA/SLIT2/PLXNA1/PTK2B/APBB1/ILK/MAGI2/FEZ1/ZEB2/F2RL1/FKBP1B/LTK/NEURL1/WNT3/CCL21/ENPP2/SCN1B/ITPKA/PRKN/PLXNA2/EFNA5/RGS2/FZD1/ITGA2/TIAM1/P3H1/RIPOR2/MAP1B/NDRG4/APC/DZIP1/ALKAL1/NDNF/VLDLR/CDC42EP3/NTRK2/RET/TUBB2B/EPHA4/AVIL/PROM2/CAMK1D/FGFR1/CC…	GO_BP
169	GO:0050769~positive regulation of neurogenesis	99	99/2754	470/18012	0.000440298	0.00595314	1.37764	ENSG00000104435/ENSG00000105894/ENSG00000172260/ENSG00000065320/ENSG00000107864/ENSG00000198121/ENSG00000124772/ENSG00000107562/ENSG00000157193/ENSG00000164850/ENSG00000136271/ENSG00000006327/ENSG00000153162/ENSG00000112175/ENSG00000081189/ENSG00000171791/ENSG00000092421/ENSG00000116473/ENSG00000239672/ENSG00000157404/ENSG00000121807/ENSG00000049759/ENSG00000135124/ENSG00000064300/ENSG00000125845…	STMN2/PTN/NEGR1/NTN1/CPEB3/LPAR1/CPNE5/CXCL12/LRP8/GPER1/DDX56/TNFRSF12A/BMP6/BMP5/MEF2C/BCL2/SEMA6A/RAP1A/NME1/KIT/CCR2/NEDD4L/P2RX4/NGFR/BMP2/EZH2/XRCC2/ECT2/L1CAM/VEGFA/SLIT2/PLXNA1/TGIF2/PTK2B/APBB1/ILK/E2F1/MAGI2/FEZ1/SOCS2/ZEB2/IL6ST/FKBP1B/LTK/NEURL1/WNT3/SCN1B/ITPKA/PRKN/PLXNA2/EFNA5/RGS2/FZD1/TIAM1/P3H1/MAP1B/NDRG4/GLI3/CSF1/ATOH1/ZEB1/TRPC6/LIF/ALKAL1/ASPM/NDNF/CPNE1/VLDLR/NTRK2/DNMT3B/…	GO_BP
170	GO:0097746~regulation of blood vessel diameter	37	37/2754	140/18012	0.000448659	0.00600081	1.72851	ENSG00000100604/ENSG00000169860/ENSG00000146469/ENSG00000124205/ENSG00000108405/ENSG00000156113/ENSG00000145936/ENSG00000164850/ENSG00000244734/ENSG00000169418/ENSG00000165895/ENSG00000136160/ENSG00000100292/ENSG00000168398/ENSG00000164251/ENSG00000105974/ENSG00000171388/ENSG00000180914/ENSG00000150594/ENSG00000117298/ENSG00000070961/ENSG00000120915/ENSG00000116741/ENSG00000185532/ENSG00000183023…	CHGA/P2RY1/VIP/EDN3/P2RX1/KCNMA1/KCNMB1/GPER1/HBB/NPR1/ARHGAP42/EDNRB/HMOX1/BDKRB2/F2RL1/CAV1/APLN/OXTR/ADRA2A/ECE1/ATP2B1/EPHX2/RGS2/PRKG1/SLC8A1/PPARD/HTR1D/PLOD3/P2RY2/CD38/TRPM4/COMP/ACTA2/EDNRA/AGT/GUCY1A3/SERPINF2	GO_BP
171	GO:0051090~regulation of DNA-binding transcription factor activity	91	91/2754	426/18012	0.000455694	0.00606875	1.39711	ENSG00000135218/ENSG00000166501/ENSG00000119950/ENSG00000141052/ENSG00000164342/ENSG00000158828/ENSG00000162407/ENSG00000105989/ENSG00000109339/ENSG00000204614/ENSG00000121933/ENSG00000157193/ENSG00000136826/ENSG00000118515/ENSG00000155846/ENSG00000157404/ENSG00000187446/ENSG00000104312/ENSG00000106462/ENSG00000100292/ENSG00000182916/ENSG00000100784/ENSG00000075142/ENSG00000112559/ENSG00000137486…	CD36/PRKCB/MXI1/MYOCD/TLR3/PINK1/PLPP3/WNT2/MAPK10/TRIM40/TMIGD3/LRP8/KLF4/SGK1/PPARGC1B/KIT/CHP1/RIPK2/EZH2/HMOX1/TCEAL7/RPS6KA5/SRI/MDFI/ARRB1/PPARGC1A/PPRC1/VEGFA/CMKLR1/BTK/CLU/FANCA/CAV1/PLA2G10/DDR2/RHEBL1/FANCD2/ENPP1/ROR1/FZD1/SMAD7/TRAIP/AR/PTGIS/TRAF5/MAD2L2/ANXA3/MAPK3/FOSL1/HCLS1/BHLHE40/CARD14/TONSL/MSX2/ERBIN/HCK/FOXS1/TLR6/SHH/GFI1/FOXA2/NLRC3/CAMK1D/LGALS9/IL18/TNFRSF11A/NLRP2/FLN…	GO_BP
172	GO:1901879~regulation of protein depolymerization	25	25/2754	83/18012	0.000462795	0.00615012	1.96997	ENSG00000104435/ENSG00000006747/ENSG00000109265/ENSG00000163431/ENSG00000165410/ENSG00000172661/ENSG00000173898/ENSG00000148180/ENSG00000136108/ENSG00000164251/ENSG00000050405/ENSG00000166780/ENSG00000100092/ENSG00000131711/ENSG00000136059/ENSG00000134982/ENSG00000128872/ENSG00000152527/ENSG00000129682/ENSG00000135407/ENSG00000137877/ENSG00000166963/ENSG00000137710/ENSG00000115956/ENSG00000111199	STMN2/SCIN/KIAA1211/LMOD1/CFL2/WASHC2C/SPTBN2/GSN/CKAP2/F2RL1/LIMA1/C16orf45/SH3BP1/MAP1B/VILL/APC/TMOD2/PLEKHH2/FGF13/AVIL/SPTBN5/MAP1A/RDX/PLEK/TRPV4	GO_BP
173	GO:0071456~cellular response to hypoxia	49	49/2754	201/18012	0.000478389	0.00627312	1.5944	ENSG00000105894/ENSG00000164442/ENSG00000129474/ENSG00000158828/ENSG00000145936/ENSG00000181061/ENSG00000181856/ENSG00000171791/ENSG00000160307/ENSG00000136997/ENSG00000100292/ENSG00000124440/ENSG00000167315/ENSG00000109819/ENSG00000090020/ENSG00000135245/ENSG00000134057/ENSG00000116016/ENSG00000112715/ENSG00000124253/ENSG00000114023/ENSG00000101412/ENSG00000137449/ENSG00000152455/ENSG00000141682…	PTN/CITED2/AJUBA/PINK1/KCNMB1/HIGD1A/SLC2A4/BCL2/S100B/MYC/HMOX1/HIF3A/ACAA2/PPARGC1A/SLC9A1/HILPDA/CCNB1/EPAS1/VEGFA/PCK1/FAM162A/E2F1/CPEB2/SUV39H2/PMAIP1/SLC8A1/PTGIS/PPARD/PSMA7/EIF4EBP1/CCNA2/TRPC6/SUV39H1/NDNF/CLCA1/STC1/FABP1/STC2/NDRG1/RORA/BRIP1/AQP1/CA9/EGLN3/CYBB/TWIST1/TERT/MALAT1/BMP7	GO_BP
174	GO:0007548~sex differentiation	62	62/2754	270/18012	0.000528416	0.00678955	1.50185	ENSG00000164442/ENSG00000118526/ENSG00000164342/ENSG00000184347/ENSG00000137273/ENSG00000110092/ENSG00000125398/ENSG00000153162/ENSG00000112175/ENSG00000171791/ENSG00000134245/ENSG00000157404/ENSG00000266412/ENSG00000153094/ENSG00000137486/ENSG00000121858/ENSG00000112715/ENSG00000145147/ENSG00000125977/ENSG00000122641/ENSG00000123131/ENSG00000205213/ENSG00000102384/ENSG00000187741/ENSG00000154734…	CITED2/TCF21/TLR3/SLIT3/FOXF2/CCND1/SOX9/BMP6/BMP5/BCL2/WNT2B/KIT/NCOA4/BCL2L11/ARRB1/TNFSF10/VEGFA/SLIT2/EIF2S2/INHBA/PRDX4/LGR4/CENPI/FANCA/ADAMTS1/CBX2/BRCA2/KIF18A/TCF7/AR/PBX1/ADGRG1/STRA6/CEBPB/KITLG/ZFPM2/NUDT1/ASPM/HYAL3/PDGFRA/AXL/TYRO3/SHH/BRIP1/SALL1/ZP3/FLNA/SFRP2/AKR1C3/ROR2/AMH/GAS2/CTSV/WNT5A/FSTL3/SCX/DACH1/VGF/INHBB/COL9A3/EREG/ROBO2	GO_BP
175	GO:0071453~cellular response to oxygen levels	54	54/2754	228/18012	0.000540429	0.00692956	1.54902	ENSG00000105894/ENSG00000164442/ENSG00000198121/ENSG00000129474/ENSG00000158828/ENSG00000145936/ENSG00000181061/ENSG00000181856/ENSG00000171791/ENSG00000160307/ENSG00000136997/ENSG00000100292/ENSG00000124440/ENSG00000167315/ENSG00000109819/ENSG00000090020/ENSG00000135245/ENSG00000134057/ENSG00000116016/ENSG00000112715/ENSG00000124253/ENSG00000114023/ENSG00000101412/ENSG00000137449/ENSG00000105974…	PTN/CITED2/LPAR1/AJUBA/PINK1/KCNMB1/HIGD1A/SLC2A4/BCL2/S100B/MYC/HMOX1/HIF3A/ACAA2/PPARGC1A/SLC9A1/HILPDA/CCNB1/EPAS1/VEGFA/PCK1/FAM162A/E2F1/CPEB2/CAV1/SUV39H2/FAS/PMAIP1/SLC8A1/PTGIS/PPARD/PSMA7/EIF4EBP1/CCNA2/TRPC6/SUV39H1/FOXO1/NDNF/CLCA1/DNMT3B/STC1/FABP1/STC2/NDRG1/RORA/BRIP1/AQP1/CA9/EGLN3/CYBB/TWIST1/TERT/MALAT1/BMP7	GO_BP
176	GO:0051445~regulation of meiotic cell cycle	17	17/2754	49/18012	0.000623341	0.00757037	2.26909	ENSG00000071539/ENSG00000101224/ENSG00000172572/ENSG00000142875/ENSG00000181773/ENSG00000181085/ENSG00000163132/ENSG00000158402/ENSG00000164045/ENSG00000112742/ENSG00000128342/ENSG00000117399/ENSG00000066279/ENSG00000120149/ENSG00000120129/ENSG00000158806/ENSG00000114251	TRIP13/CDC25B/PDE3A/PRKACB/GPR3/MAPK15/MSX1/CDC25C/CDC25A/TTK/LIF/CDC20/ASPM/MSX2/DUSP1/NPM2/WNT5A	GO_BP
177	GO:0007584~response to nutrient	52	52/2754	219/18012	0.000636175	0.00769388	1.55295	ENSG00000105894/ENSG00000147883/ENSG00000169860/ENSG00000108405/ENSG00000165457/ENSG00000110092/ENSG00000135124/ENSG00000100292/ENSG00000151882/ENSG00000148180/ENSG00000197256/ENSG00000101444/ENSG00000111012/ENSG00000119782/ENSG00000005882/ENSG00000139515/ENSG00000070961/ENSG00000111424/ENSG00000164171/ENSG00000183023/ENSG00000112033/ENSG00000131711/ENSG00000003137/ENSG00000175591/ENSG00000108821…	PTN/CDKN2B/P2RY1/P2RX1/FOLR2/CCND1/P2RX4/HMOX1/CCL28/GSN/KANK2/AHCY/CYP27B1/FKBP1B/PDK2/PDX1/ATP2B1/VDR/ITGA2/SLC8A1/PPARD/MAP1B/CYP26B1/P2RY2/COL1A1/PCNA/CD3E/DNMT3B/STC1/ABCA1/TRPM4/STC2/CD4/FOXA2/LIPG/BRIP1/P2RX7/GSTP1/C2/SFRP2/AKR1C3/VCAM1/SPARC/KCNJ11/CYBB/SPP1/NOD2/BMP7/CXCL10/TNFRSF11B/IL1B/PKLR	GO_BP
178	GO:0016049~cell growth	99	99/2754	476/18012	0.000691793	0.00813118	1.36027	ENSG00000168309/ENSG00000137872/ENSG00000065320/ENSG00000133083/ENSG00000138193/ENSG00000124772/ENSG00000141052/ENSG00000082397/ENSG00000022267/ENSG00000107562/ENSG00000184347/ENSG00000010319/ENSG00000204614/ENSG00000096384/ENSG00000006327/ENSG00000182636/ENSG00000130558/ENSG00000125398/ENSG00000118515/ENSG00000171791/ENSG00000092421/ENSG00000197380/ENSG00000130713/ENSG00000169418/ENSG00000109846…	FAM107A/SEMA6D/NTN1/DCLK1/PLCE1/CPNE5/MYOCD/EPB41L3/FHL1/CXCL12/SLIT3/SEMA3G/TRIM40/HSP90AB1/TNFRSF12A/NDN/OLFM1/SOX9/SGK1/BCL2/SEMA6A/DACT3/EXOSC2/NPR1/CRYAB/NEDD4L/SESN2/AKAP6/BDKRB1/RASGRP2/CEACAM1/SLC9A1/L1CAM/TMEM97/RERG/AURKA/VEGFA/SLIT2/EAF2/PLXNA1/PTK2B/APBB1/ILK/SOCS2/ACVRL1/ZEB2/INHBA/CYP27B1/WNT3/SPART/FBLN5/PRKN/KIF14/PSRC1/ENPP1/EFNA5/RGS2/CAMK2D/TIAM1/PPARD/CDHR2/WFDC1/MSX1/MAP1B/MA…	GO_BP
179	GO:0150063~visual system development	79	79/2754	365/18012	0.000698382	0.00816226	1.41557	ENSG00000105894/ENSG00000101605/ENSG00000101680/ENSG00000101938/ENSG00000137936/ENSG00000105989/ENSG00000137273/ENSG00000136826/ENSG00000125398/ENSG00000153162/ENSG00000151090/ENSG00000171791/ENSG00000134245/ENSG00000165821/ENSG00000181541/ENSG00000109846/ENSG00000160111/ENSG00000135446/ENSG00000128573/ENSG00000144821/ENSG00000103494/ENSG00000143995/ENSG00000178573/ENSG00000179431/ENSG00000166402…	PTN/MYOM1/LAMA1/CHRDL1/BCAR3/WNT2/FOXF2/KLF4/SOX9/BMP6/THRB/BCL2/WNT2B/SALL2/MAB21L2/CRYAB/CPAMD8/CDK4/FOXP2/MYH15/RPGRIP1L/MEIS1/MAF/FJX1/TUB/VEGFA/TGIF2/ACVRL1/ZEB2/INHBA/RXRA/FZD5/CLCN2/ATP2B1/ATP2B4/WNT9A/GRHL3/GLI3/STRA6/SLC7A11/BFSP1/MEIS2/ZEB1/EFEMP1/SDK1/ACHE/NTRK2/RHOJ/C1QA/SLITRK6/PDGFRA/RET/NECTIN3/COL4A1/CRYBG3/LAMC3/WNT5B/SHH/MFAP2/MITF/HSF4/B9D1/BMP4/THY1/COL5A2/NKD1/SLC39A5/TFAP2A/…	GO_BP
180	GO:0030278~regulation of ossification	47	47/2754	194/18012	0.000712441	0.00829532	1.58451	ENSG00000160712/ENSG00000105894/ENSG00000130055/ENSG00000046653/ENSG00000125398/ENSG00000153162/ENSG00000081189/ENSG00000171791/ENSG00000066468/ENSG00000125845/ENSG00000171522/ENSG00000120899/ENSG00000166333/ENSG00000134352/ENSG00000111012/ENSG00000162733/ENSG00000070961/ENSG00000197594/ENSG00000101265/ENSG00000183023/ENSG00000185630/ENSG00000170989/ENSG00000106571/ENSG00000172216/ENSG00000184371…	IL6R/PTN/GDPD2/GPM6B/SOX9/BMP6/MEF2C/BCL2/FGFR2/BMP2/PTGER4/PTK2B/ILK/IL6ST/CYP27B1/DDR2/ATP2B1/ENPP1/RASSF2/SLC8A1/PBX1/S1PR1/GLI3/CEBPB/CSF1/MAPK3/MGP/IFITM1/WISP1/MSX2/TWIST2/CTHRC1/TRPM4/AXIN2/COMP/P2RX7/BMP4/SFRP2/KREMEN2/TFAP2A/AREG/TWIST1/RFLNA/SRGN/LTF/WNT5A/BMP7	GO_BP
181	GO:0010324~membrane invagination	21	21/2754	67/18012	0.000719499	0.00834619	2.04995	ENSG00000136044/ENSG00000135218/ENSG00000110934/ENSG00000148180/ENSG00000164251/ENSG00000163219/ENSG00000164171/ENSG00000100092/ENSG00000123338/ENSG00000254709/ENSG00000204472/ENSG00000155849/ENSG00000178999/ENSG00000132718/ENSG00000072694/ENSG00000165029/ENSG00000144366/ENSG00000179348/ENSG00000169896/ENSG00000125730/ENSG00000019169	APPL2/CD36/BIN2/GSN/F2RL1/ARHGAP25/ITGA2/SH3BP1/NCKAP1L/IGLL5/AIF1/ELMO1/AURKB/SYT11/FCGR2B/ABCA1/GULP1/GATA2/ITGAM/C3/MARCO	GO_BP
182	GO:0002468~dendritic cell antigen processing and presentation	7	2754-07-01	12/18012	0.000753748	0.00857731	3.81518	ENSG00000127951/ENSG00000172724/ENSG00000137077/ENSG00000072694/ENSG00000126353/ENSG00000018280/ENSG00000167207	FGL2/CCL19/CCL21/FCGR2B/CCR7/SLC11A1/NOD2	GO_BP
183	GO:0010623~programmed cell death involved in cell development	7	2754-07-01	12/18012	0.000753748	0.00857731	3.81518	ENSG00000163687/ENSG00000171791/ENSG00000157404/ENSG00000049130/ENSG00000253729/ENSG00000115008/ENSG00000125538	DNASE1L3/BCL2/KIT/KITLG/PRKDC/IL1A/IL1B	GO_BP
184	GO:0051988~regulation of attachment of spindle microtubules to kinetochore	7	2754-07-01	12/18012	0.000753748	0.00857731	3.81518	ENSG00000114346/ENSG00000134057/ENSG00000117650/ENSG00000161800/ENSG00000134982/ENSG00000076382/ENSG00000128944	ECT2/CCNB1/NEK2/RACGAP1/APC/SPAG5/KNSTRN	GO_BP
185	GO:0072697~protein localization to cell cortex	7	2754-07-01	12/18012	0.000753748	0.00857731	3.81518	ENSG00000114993/ENSG00000011426/ENSG00000186193/ENSG00000127955/ENSG00000166851/ENSG00000121957/ENSG00000099812	RTKN/ANLN/SAPCD2/GNAI1/PLK1/GPSM2/MISP	GO_BP
186	GO:2000105~positive regulation of DNA-dependent DNA replication	7	2754-07-01	12/18012	0.000753748	0.00857731	3.81518	ENSG00000123374/ENSG00000165891/ENSG00000161692/ENSG00000006634/ENSG00000167513/ENSG00000077782/ENSG00000097046	CDK2/E2F7/DBF4B/DBF4/CDT1/FGFR1/CDC7	GO_BP
187	GO:0071695~anatomical structure maturation	41	41/2754	164/18012	0.00078132	0.00880013	1.63508	ENSG00000062038/ENSG00000153902/ENSG00000071539/ENSG00000101224/ENSG00000171791/ENSG00000125845/ENSG00000136160/ENSG00000172572/ENSG00000122707/ENSG00000087586/ENSG00000134057/ENSG00000120899/ENSG00000139567/ENSG00000186417/ENSG00000139618/ENSG00000163531/ENSG00000188906/ENSG00000170989/ENSG00000074527/ENSG00000162367/ENSG00000197535/ENSG00000104903/ENSG00000133710/ENSG00000120149/ENSG00000101311…	CDH3/LGI4/TRIP13/CDC25B/BCL2/BMP2/EDNRB/PDE3A/RECK/AURKA/CCNB1/PTK2B/ACVRL1/GLDN/BRCA2/NFASC/LRRK2/S1PR1/NTN4/TAL1/MYO5A/LYL1/SPINK5/MSX2/FERMT1/C1QA/PABPC1L/RET/XYLT1/CDKN1A/FAT4/TFCP2L1/KLF2/RFLNA/HOXA5/LTF/WNT5A/FOXA1/C3/EREG/HOXB13	GO_BP
188	GO:0060314~regulation of ryanodine-sensitive calcium-release channel activity	11	2754-11-01	26/18012	0.000866488	0.00945065	2.76705	ENSG00000198523/ENSG00000149596/ENSG00000151320/ENSG00000213366/ENSG00000075142/ENSG00000155962/ENSG00000113448/ENSG00000119782/ENSG00000104369/ENSG00000198947/ENSG00000145349	PLN/JPH2/AKAP6/GSTM2/SRI/CLIC2/PDE4D/FKBP1B/JPH1/DMD/CAMK2D	GO_BP
189	GO:0034764~positive regulation of transmembrane transport	48	48/2754	201/18012	0.000880808	0.00953978	1.56186	ENSG00000145362/ENSG00000124205/ENSG00000151150/ENSG00000104267/ENSG00000158828/ENSG00000167323/ENSG00000145936/ENSG00000164850/ENSG00000135828/ENSG00000197943/ENSG00000149596/ENSG00000103888/ENSG00000116473/ENSG00000121807/ENSG00000187446/ENSG00000145861/ENSG00000151320/ENSG00000213366/ENSG00000165995/ENSG00000100739/ENSG00000075142/ENSG00000090020/ENSG00000105270/ENSG00000126803/ENSG00000127914…	ANK2/EDN3/ANK3/CA2/PINK1/STIM1/KCNMB1/GPER1/RNASEL/PLCG2/JPH2/CEMIP/RAP1A/CCR2/CHP1/C1QTNF2/AKAP6/GSTM2/CACNB2/BDKRB1/SRI/SLC9A1/CLIP3/HSPA2/AKAP9/DMD/C1QTNF12/ITLN1/CACNA2D1/CTSS/SORBS1/TRPC6/SLC9A3R1/ABCB1/TESC/TRPC1/P2RX7/FLNA/THY1/CHCHD10/KLF15/CXCL11/KCNJ11/AGT/LRRC26/TERT/C3/CXCL10	GO_BP
190	GO:0033627~cell adhesion mediated by integrin	21	21/2754	68/18012	0.000893108	0.00963935	2.0198	ENSG00000105851/ENSG00000137077/ENSG00000139626/ENSG00000164171/ENSG00000123338/ENSG00000122861/ENSG00000115232/ENSG00000198851/ENSG00000271503/ENSG00000101311/ENSG00000259207/ENSG00000165731/ENSG00000088992/ENSG00000156234/ENSG00000149781/ENSG00000106366/ENSG00000145423/ENSG00000136999/ENSG00000138061/ENSG00000137809/ENSG00000198542	PIK3CG/CCL21/ITGB7/ITGA2/NCKAP1L/PLAU/ITGA4/CD3E/CCL5/FERMT1/ITGB3/RET/TESC/CXCL13/FERMT3/SERPINE1/SFRP2/NOV/CYP1B1/ITGA11/ITGBL1	GO_BP
191	GO:0062023~collagen-containing extracellular matrix	139	139/2884	405/18950	4.53288e-22	3.26368e-19	2.25514	ENSG00000163815/ENSG00000168477/ENSG00000154175/ENSG00000105894/ENSG00000101955/ENSG00000149294/ENSG00000143196/ENSG00000065320/ENSG00000138722/ENSG00000271447/ENSG00000138615/ENSG00000145681/ENSG00000101680/ENSG00000174992/ENSG00000107562/ENSG00000134028/ENSG00000127951/ENSG00000105989/ENSG00000197614/ENSG00000120708/ENSG00000164176/ENSG00000124491/ENSG00000148357/ENSG00000102265/ENSG00000134245…	CLEC3B/TNXB/ABI3BP/PTN/SRPX/NCAM1/DPT/NTN1/MMRN1/MMP28/CILP/HAPLN1/LAMA1/ZG16/CXCL12/ADAMDEC1/FGL2/WNT2/MFAP5/TGFBI/EDIL3/F13A1/HMCN2/TIMP1/WNT2B/CFP/FGFR2/GDF15/PRELP/L1CAM/ACAN/SCARA3/CPA3/TPSAB1/TPSB2/LGALS4/EGFL6/ADAMTSL4/ITIH5/P3H2/MFAP4/CLU/SPARCL1/ADAMTS1/FBLN5/APLP1/COL28A1/EFNA5/PCSK6/MATN2/CTSS/P3H1/NTN4/A2M/SERPINH1/BGN/TINAG/VWA2/MGP/PLOD3/CCDC80/LGALS3/COL4A5/EFEMP1/COL10A1/DST/LTBP4…	GO_CC
192	GO:0005604~basement membrane	37	37/2884	94/18950	1.09655e-08	2.48437e-06	2.58635	ENSG00000105894/ENSG00000065320/ENSG00000101680/ENSG00000120708/ENSG00000148357/ENSG00000102265/ENSG00000157766/ENSG00000198759/ENSG00000090530/ENSG00000154734/ENSG00000105290/ENSG00000215018/ENSG00000184349/ENSG00000132561/ENSG00000074527/ENSG00000137251/ENSG00000165816/ENSG00000091986/ENSG00000188153/ENSG00000151914/ENSG00000077942/ENSG00000112851/ENSG00000113296/ENSG00000087085/ENSG00000134013…	PTN/NTN1/LAMA1/TGFBI/HMCN2/TIMP1/ACAN/EGFL6/P3H2/ADAMTS1/APLP1/COL28A1/EFNA5/MATN2/NTN4/TINAG/VWA2/CCDC80/COL4A5/DST/FBLN1/ERBIN/THBS4/ACHE/LOXL2/COL7A1/MMRN2/COL4A1/LAMA2/LAMC3/RELL2/COL4A4/SPARC/COL17A1/COL5A1/THBS2/COL8A1	GO_CC
193	GO:0005902~microvillus	34	34/2884	83/18950	1.29811e-08	2.48437e-06	2.69163	ENSG00000104267/ENSG00000155850/ENSG00000080031/ENSG00000131471/ENSG00000079385/ENSG00000241399/ENSG00000026508/ENSG00000120156/ENSG00000099834/ENSG00000163993/ENSG00000180914/ENSG00000163531/ENSG00000197892/ENSG00000166866/ENSG00000145703/ENSG00000074276/ENSG00000188906/ENSG00000154188/ENSG00000016490/ENSG00000197471/ENSG00000109062/ENSG00000259207/ENSG00000134853/ENSG00000008323/ENSG00000155066…	CA2/SLC26A2/PTPRH/AOC3/CEACAM1/CD302/CD44/TEK/CDHR5/S100P/OXTR/NFASC/KIF13B/MYO1A/IQGAP2/CDHR2/LRRK2/ANGPT1/CLCA1/SPN/SLC9A3R1/ITGB3/PDGFRA/PLEKHG6/PROM2/DPEP1/ESPN/VCAM1/PDPN/AKR1B1/RDX/CA9/CTSV/FOXA1	GO_CC
194	GO:0045177~apical part of cell	101	101/2884	386/18950	1.38021e-08	2.48437e-06	1.71929	ENSG00000103375/ENSG00000160712/ENSG00000168447/ENSG00000168060/ENSG00000119121/ENSG00000145362/ENSG00000167434/ENSG00000197375/ENSG00000016602/ENSG00000146039/ENSG00000169860/ENSG00000135218/ENSG00000077943/ENSG00000134121/ENSG00000103257/ENSG00000170482/ENSG00000104267/ENSG00000112578/ENSG00000069974/ENSG00000156113/ENSG00000096384/ENSG00000155850/ENSG00000163347/ENSG00000104880/ENSG00000080031…	AQP8/IL6R/SCNN1B/NAALADL1/TRPM6/ANK2/CA4/SLC22A5/CLCA4/SLC17A4/P2RY1/CD36/ITGA8/CHL1/SLC7A5/SLC23A1/CA2/BYSL/RAB27A/KCNMA1/HSP90AB1/SLC26A2/CLDN1/ARHGEF18/PTPRH/SI/ATP8B1/CLIC5/SAPCD2/SLC9A3/SPTBN2/CEACAM1/SLC9A1/PLD1/CD44/TEK/CDHR5/SLC3A2/PDE4D/SLC1A1/SLC29A1/EPB41L4B/SLC26A3/SLC22A4/OXTR/DDR2/CEACAM7/HOMER1/NOX4/ATP2B1/SLC2A5/MYO1A/SHROOM3/CDHR2/RIPOR2/AMOTL1/SLC44A4/MPDZ/PDZD3/AMN/ASPM/SLC12A2…	GO_CC
195	GO:0009897~external side of plasma membrane	86	86/2884	315/18950	2.0329e-08	2.92737e-06	1.79391	ENSG00000113594/ENSG00000160712/ENSG00000168447/ENSG00000167434/ENSG00000177675/ENSG00000149294/ENSG00000151892/ENSG00000108405/ENSG00000135218/ENSG00000113303/ENSG00000090659/ENSG00000107562/ENSG00000165457/ENSG00000105989/ENSG00000159307/ENSG00000168903/ENSG00000112964/ENSG00000158473/ENSG00000105369/ENSG00000181856/ENSG00000157404/ENSG00000166825/ENSG00000121807/ENSG00000007312/ENSG00000139193…	LIFR/IL6R/SCNN1B/CA4/CD163L1/NCAM1/GFRA1/P2RX1/CD36/BTNL8/CD209/CXCL12/FOLR2/WNT2/SCUBE1/BTNL3/GHR/CD1D/CD79A/SLC2A4/KIT/ANPEP/CCR2/CD79B/CD27/HHLA2/MS4A1/LEPR/IL6ST/ULBP3/CAPN2/ECE1/EFNA5/ITGA2/EBI3/IL11RA/S1PR1/CD33/IGLL5/ANTXR2/CD69/PCSK9/TNFRSF13C/CD3E/CLEC14A/FCGR2B/PDGFRA/ABCA1/FCN1/B2M/CD163/IL1R1/TFR2/SSC5D/CD3G/CD4/PTPRC/LAG3/TGFBR3/CD226/AZGP1/TNFRSF11A/CD14/CD28/CCR7/P2RX7/TLR8/ENPP3/C…	GO_CC
196	GO:0005911~cell-cell junction	114	114/2884	459/18950	3.77534e-08	4.53041e-06	1.63195	ENSG00000145362/ENSG00000253958/ENSG00000154721/ENSG00000062038/ENSG00000101680/ENSG00000177098/ENSG00000129474/ENSG00000151150/ENSG00000150471/ENSG00000082397/ENSG00000100014/ENSG00000163191/ENSG00000154330/ENSG00000109458/ENSG00000184113/ENSG00000100266/ENSG00000110092/ENSG00000163347/ENSG00000140832/ENSG00000165269/ENSG00000081026/ENSG00000172137/ENSG00000183856/ENSG00000157404/ENSG00000064666…	ANK2/CLDN23/JAM2/CDH3/LAMA1/SCN4B/AJUBA/ANK3/ADGRL3/EPB41L3/SPECC1L/S100A11/PGM5/GAB1/CLDN5/PACSIN2/CCND1/CLDN1/MARVELD3/AQP7/MAGI3/CALB2/IQGAP3/KIT/CNN2/BVES/CDK4/SYNPO/AKAP6/JAML/RPGRIP1L/SAPCD2/MPP5/ECT2/CEACAM1/SLC9A1/PDLIM2/TEK/VEGFA/CLMP/FRMD4B/ILK/MAGI2/DSC2/LIMS2/PLEKHA7/JAM3/CDCA3/CGN/EPB41L4B/OXTR/SCN1B/CCDC85C/FZD5/NFASC/PDLIM3/MAPK15/TIAM1/DES/SMAD7/SLC8A1/SHROOM3/AOC1/PERP/SH3BP1/CLD…	GO_CC
197	GO:0043235~receptor complex	101	101/2884	395/18950	4.85515e-08	4.99387e-06	1.68011	ENSG00000113594/ENSG00000160712/ENSG00000151892/ENSG00000135218/ENSG00000077943/ENSG00000151623/ENSG00000096384/ENSG00000157193/ENSG00000105976/ENSG00000112964/ENSG00000105369/ENSG00000157404/ENSG00000169418/ENSG00000007312/ENSG00000066468/ENSG00000125845/ENSG00000080644/ENSG00000170075/ENSG00000187730/ENSG00000243646/ENSG00000117322/ENSG00000163686/ENSG00000196664/ENSG00000079385/ENSG00000144381…	LIFR/IL6R/GFRA1/CD36/ITGA8/NR3C2/HSP90AB1/LRP8/MET/GHR/CD79A/KIT/NPR1/CD79B/FGFR2/BMP2/CHRNA3/GPR37L1/GABRD/IL10RB/CR2/ABHD6/TLR7/CEACAM1/HSPD1/CD44/TEK/EPHB4/PLXNA1/PTK2B/LEPR/ACVRL1/IL6ST/GRIN2D/LTK/EPHA10/RXRA/VIPR1/DDR2/ITGA7/ACVR1C/ADRA2A/ITGB7/APBB1IP/PLXNA2/ITLN1/LOXL4/VDR/ROR1/ITGA2/EBI3/CSF2RB/IL11RA/TRAF5/FCRL5/SORBS1/ITGAL/GRIN2B/CSF1R/VLDLR/TLR1/ITGA4/CD3E/NTRK2/ITGB3/PDGFRA/CD247/AXL…	GO_CC
198	GO:0044420~extracellular matrix component	24	24/2884	51/18950	7.43907e-08	6.13036e-06	3.09211	ENSG00000101680/ENSG00000197614/ENSG00000157766/ENSG00000166482/ENSG00000140092/ENSG00000074527/ENSG00000188153/ENSG00000077942/ENSG00000108821/ENSG00000060718/ENSG00000187955/ENSG00000114270/ENSG00000187720/ENSG00000187498/ENSG00000111799/ENSG00000117122/ENSG00000081052/ENSG00000204262/ENSG00000185761/ENSG00000196739/ENSG00000130635/ENSG00000080573/ENSG00000164692/ENSG00000144810	LAMA1/MFAP5/ACAN/MFAP4/FBLN5/NTN4/COL4A5/FBLN1/COL1A1/COL11A1/COL14A1/COL7A1/THSD4/COL4A1/COL12A1/MFAP2/COL4A4/COL5A2/ADAMTSL5/COL27A1/COL5A1/COL5A3/COL1A2/COL8A1	GO_CC
199	GO:0045121~membrane raft	84	84/2884	316/18950	1.0693e-07	7.69899e-06	1.74665	ENSG00000204936/ENSG00000145362/ENSG00000168497/ENSG00000108405/ENSG00000135218/ENSG00000046653/ENSG00000144063/ENSG00000111863/ENSG00000167323/ENSG00000156113/ENSG00000157193/ENSG00000005249/ENSG00000100266/ENSG00000105369/ENSG00000181856/ENSG00000076641/ENSG00000112276/ENSG00000151320/ENSG00000080644/ENSG00000179841/ENSG00000117758/ENSG00000136160/ENSG00000100292/ENSG00000117091/ENSG00000156738…	CD177/ANK2/CAVIN2/P2RX1/CD36/GPM6B/MALL/ADTRP/STIM1/KCNMA1/LRP8/PRKAR2B/PACSIN2/CD79A/SLC2A4/PAG1/BVES/AKAP6/CHRNA3/AKAP5/STX12/EDNRB/HMOX1/CD48/MS4A1/SLC9A1/CLIP3/GNAI1/TEK/PTK2B/BTK/CAV1/DMD/CAPN2/FAS/ITLN1/ATP2B1/EFNA5/KIF18A/ATP2B4/MYO1A/MYO1D/PTGIS/LRRK2/AHNAK/ADGRG1/S1PR1/SERPINH1/MAPK3/SORBS1/ANGPT1/HPSE/TLR1/SLC9A3R1/RET/ABCA1/HCK/SLC2A1/STOM/TLR6/SHH/CD4/PTPRC/PROM2/CD226/CD14/ARID3A/UNC…	GO_CC
200	GO:0031253~cell projection membrane	89	89/2884	347/18950	2.58357e-07	1.55014e-05	1.68529	ENSG00000168309/ENSG00000040199/ENSG00000119121/ENSG00000136044/ENSG00000167434/ENSG00000197375/ENSG00000135218/ENSG00000077943/ENSG00000102010/ENSG00000082397/ENSG00000096384/ENSG00000164850/ENSG00000059915/ENSG00000160191/ENSG00000100266/ENSG00000155850/ENSG00000164161/ENSG00000181418/ENSG00000080031/ENSG00000205795/ENSG00000239672/ENSG00000081923/ENSG00000112276/ENSG00000099864/ENSG00000170075…	FAM107A/PHLPP2/TRPM6/APPL2/CA4/SLC22A5/CD36/ITGA8/BMX/EPB41L3/HSP90AB1/GPER1/PSD/PDE9A/PACSIN2/SLC26A2/HHIP/DDN/PTPRH/CYS1/NME1/ATP8B1/BVES/PALM/GPR37L1/AKAP5/GNA13/MPP2/SGCE/SLC9A3/RASGRP2/CEACAM1/CD44/CDHR5/S100P/CNGA1/CYBRD1/SLC5A6/LIMA1/SLC26A3/DMD/ITLN1/ATP2B1/MYO1D/TIAM1/CDHR2/RIPOR2/NDRG4/FGD2/TPM1/APC/SLC7A11/AIF1/SCIMP/PLEKHO1/GABARAPL1/AMN/SLC9A3R1/FERMT2/FERMT1/SLC46A1/ITGB3/SLC3A1/SPT…	GO_CC
201	GO:0032432~actin filament bundle	29	29/2884	74/18950	4.61147e-07	2.55405e-05	2.57502	ENSG00000168309/ENSG00000154330/ENSG00000162458/ENSG00000078114/ENSG00000172403/ENSG00000109846/ENSG00000064666/ENSG00000171992/ENSG00000065534/ENSG00000120913/ENSG00000145012/ENSG00000120156/ENSG00000166333/ENSG00000120756/ENSG00000277443/ENSG00000050405/ENSG00000154553/ENSG00000086991/ENSG00000185483/ENSG00000101335/ENSG00000140416/ENSG00000095637/ENSG00000136068/ENSG00000073712/ENSG00000102024…	FAM107A/PGM5/FBLIM1/NEBL/SYNPO2/CRYAB/CNN2/SYNPO/MYLK/PDLIM2/LPP/TEK/ILK/PLS1/MARCKS/LIMA1/PDLIM3/NOX4/ROR1/MYL9/TPM1/SORBS1/FLNB/FERMT2/PLS3/SHROOM4/ABLIM3/LCP1/RFLNA	GO_CC
202	GO:0031252~cell leading edge	97	97/2884	404/18950	1.94967e-06	8.25742e-05	1.57763	ENSG00000168309/ENSG00000204936/ENSG00000104435/ENSG00000130055/ENSG00000136044/ENSG00000182168/ENSG00000077943/ENSG00000102010/ENSG00000129474/ENSG00000088280/ENSG00000082397/ENSG00000171100/ENSG00000163191/ENSG00000164850/ENSG00000059915/ENSG00000160191/ENSG00000100266/ENSG00000006327/ENSG00000181418/ENSG00000006740/ENSG00000160307/ENSG00000239672/ENSG00000099864/ENSG00000179841/ENSG00000106299…	FAM107A/CD177/STMN2/GDPD2/APPL2/UNC5C/ITGA8/BMX/AJUBA/ASAP3/EPB41L3/MTM1/S100A11/GPER1/PSD/PDE9A/PACSIN2/TNFRSF12A/DDN/ARHGAP44/S100B/NME1/PALM/AKAP5/WASL/MPP2/MYLK/SGCE/RASGRP2/ARPIN/SLC9A1/CD44/FRMD4B/GSN/PTK2B/APBB1/ILK/ARHGEF6/LIMA1/APBB1IP/ATP2B1/ACTG2/KIF18A/MYO1D/TIAM1/ARHGEF26/IQGAP2/SH3BP1/RIPOR2/AMOTL1/FGD2/TPM1/MYO5A/APC/AIF1/KITLG/SCIMP/PLEKHO1/GABARAPL1/ABI3/DST/PLEKHH2/SLC9A3R1/INPP…	GO_CC
203	GO:0005581~collagen trimer	31	31/2884	87/18950	2.12767e-06	8.51068e-05	2.3413	ENSG00000158270/ENSG00000145861/ENSG00000168077/ENSG00000186417/ENSG00000215018/ENSG00000188153/ENSG00000123500/ENSG00000108821/ENSG00000060718/ENSG00000082196/ENSG00000011465/ENSG00000187955/ENSG00000164932/ENSG00000173372/ENSG00000114270/ENSG00000085265/ENSG00000187498/ENSG00000111799/ENSG00000159189/ENSG00000081052/ENSG00000173369/ENSG00000204262/ENSG00000196739/ENSG00000065618/ENSG00000130635…	COLEC12/C1QTNF2/SCARA3/GLDN/COL28A1/COL4A5/COL10A1/COL1A1/COL11A1/C1QTNF3/DCN/COL14A1/CTHRC1/C1QA/COL7A1/FCN1/COL4A1/COL12A1/C1QC/COL4A4/C1QB/COL5A2/COL27A1/COL17A1/COL5A1/COL5A3/COL1A2/COL8A1/EDA/COL9A3/MARCO	GO_CC
204	GO:0098644~complex of collagen trimers	12	2884-12-01	19/18950	2.66361e-06	0.000100937	4.14994	ENSG00000188153/ENSG00000108821/ENSG00000060718/ENSG00000114270/ENSG00000187498/ENSG00000081052/ENSG00000204262/ENSG00000196739/ENSG00000130635/ENSG00000080573/ENSG00000164692/ENSG00000144810	COL4A5/COL1A1/COL11A1/COL7A1/COL4A1/COL4A4/COL5A2/COL27A1/COL5A1/COL5A3/COL1A2/COL8A1	GO_CC
205	GO:0031225~anchored component of membrane	49	49/2884	169/18950	3.49737e-06	0.000123232	1.90512	ENSG00000163295/ENSG00000204936/ENSG00000172260/ENSG00000167434/ENSG00000144619/ENSG00000149294/ENSG00000151892/ENSG00000135678/ENSG00000165457/ENSG00000180155/ENSG00000182175/ENSG00000259823/ENSG00000117091/ENSG00000005001/ENSG00000122707/ENSG00000131019/ENSG00000007306/ENSG00000179914/ENSG00000167261/ENSG00000184349/ENSG00000109743/ENSG00000169442/ENSG00000169213/ENSG00000008516/ENSG00000087085…	ALPI/CD177/NEGR1/CA4/CNTN4/NCAM1/GFRA1/CPM/FOLR2/LYNX1/RGMA/LYPD8/CD48/PRSS22/RECK/ULBP3/CEACAM7/ITLN1/DPEP2/EFNA5/BST1/CD52/RAB3B/MMP25/ACHE/XPNPEP2/MDGA1/TREH/GPC6/DPEP1/CD14/EFNA3/THY1/LY6E/GPC2/PRSS8/MELTF/RTN4R/TNFRSF10C/LY6G6D/VNN2/CD2/RAB27B/EFNA2/TDGF1/GAS1/LYPD3/MSLN/LYPD6B	GO_CC
206	GO:0042383~sarcolemma	41	41/2884	136/18950	7.49223e-06	0.0002452	1.98088	ENSG00000118804/ENSG00000145362/ENSG00000151150/ENSG00000154330/ENSG00000182253/ENSG00000160191/ENSG00000181856/ENSG00000162520/ENSG00000112276/ENSG00000067191/ENSG00000151320/ENSG00000127990/ENSG00000165995/ENSG00000075142/ENSG00000123096/ENSG00000090020/ENSG00000121577/ENSG00000172164/ENSG00000105974/ENSG00000198947/ENSG00000105711/ENSG00000162004/ENSG00000153956/ENSG00000142583/ENSG00000145349…	STBD1/ANK2/ANK3/PGM5/SYNM/PDE9A/SLC2A4/SYNC/BVES/CACNB1/AKAP6/SGCE/CACNB2/SRI/SSPN/SLC9A1/POPDC2/SNTB1/CAV1/DMD/SCN1B/CCDC78/CACNA2D1/SLC2A5/CAMK2D/ATP2B4/DES/PRX/SLC8A1/DTNA/FLNC/AHNAK/BGN/KCND3/LAMA2/SLC2A1/AQP1/VCAM1/KCNJ11/RDX/SGCD	GO_CC
207	GO:0000779~condensed chromosome, centromeric region	37	37/2884	119/18950	9.43331e-06	0.000295304	2.043	ENSG00000123485/ENSG00000169679/ENSG00000142945/ENSG00000165480/ENSG00000089685/ENSG00000087586/ENSG00000134057/ENSG00000117650/ENSG00000166451/ENSG00000151503/ENSG00000166851/ENSG00000115163/ENSG00000164109/ENSG00000143228/ENSG00000149636/ENSG00000152253/ENSG00000101265/ENSG00000153044/ENSG00000117724/ENSG00000184445/ENSG00000109805/ENSG00000122565/ENSG00000040275/ENSG00000156970/ENSG00000172216…	HJURP/BUB1/KIF2C/SKA3/BIRC5/AURKA/CCNB1/NEK2/CENPN/NCAPD3/PLK1/CENPA/MAD2L1/NUF2/DSN1/SPC25/RASSF2/CENPH/CENPF/KNTC1/NCAPG/CBX3/SPDL1/BUB1B/CEBPB/ERCC6L/CENPW/SPAG5/KNSTRN/SPC24/CDT1/SEPT6/SGO1/AURKB/CENPE/SKA1/CENPK	GO_CC
208	GO:0005903~brush border	32	32/2884	99/18950	1.53575e-05	0.000460725	2.12387	ENSG00000119121/ENSG00000167434/ENSG00000197375/ENSG00000135218/ENSG00000006747/ENSG00000096384/ENSG00000090402/ENSG00000081923/ENSG00000120063/ENSG00000066230/ENSG00000120756/ENSG00000099834/ENSG00000071967/ENSG00000138074/ENSG00000050405/ENSG00000091138/ENSG00000179914/ENSG00000166866/ENSG00000176658/ENSG00000074276/ENSG00000151012/ENSG00000172367/ENSG00000166126/ENSG00000088386/ENSG00000136068…	TRPM6/CA4/SLC22A5/CD36/SCIN/HSP90AB1/SI/ATP8B1/GNA13/SLC9A3/PLS1/CDHR5/CYBRD1/SLC5A6/LIMA1/SLC26A3/ITLN1/MYO1A/MYO1D/CDHR2/SLC7A11/PDZD3/AMN/SLC15A1/FLNB/SLC9A3R1/SLC46A1/SLC3A1/AQP1/ESPN/ABCC2/MME	GO_CC
209	GO:0031256~leading edge membrane	47	47/2884	172/18950	3.00465e-05	0.000772624	1.79549	ENSG00000168309/ENSG00000136044/ENSG00000077943/ENSG00000102010/ENSG00000082397/ENSG00000164850/ENSG00000059915/ENSG00000160191/ENSG00000100266/ENSG00000181418/ENSG00000006740/ENSG00000239672/ENSG00000099864/ENSG00000179841/ENSG00000108852/ENSG00000127990/ENSG00000068831/ENSG00000026508/ENSG00000070961/ENSG00000176658/ENSG00000156299/ENSG00000111913/ENSG00000146192/ENSG00000140416/ENSG00000134982…	FAM107A/APPL2/ITGA8/BMX/EPB41L3/GPER1/PSD/PDE9A/PACSIN2/DDN/ARHGAP44/NME1/PALM/AKAP5/MPP2/SGCE/RASGRP2/CD44/ATP2B1/MYO1D/TIAM1/RIPOR2/FGD2/TPM1/APC/AIF1/SCIMP/PLEKHO1/GABARAPL1/FERMT2/FERMT1/ITGB3/FAP/TESC/DOCK8/AIF1L/THY1/LCP1/PDPN/GABRE/KCNJ11/PLA2G4F/PLEK/GABRA2/TRPV4/ROBO2/REG1A	GO_CC
210	GO:0031674~I band	40	40/2884	143/18950	6.47057e-05	0.00137024	1.83797	ENSG00000145362/ENSG00000101605/ENSG00000151150/ENSG00000171100/ENSG00000114166/ENSG00000154330/ENSG00000149596/ENSG00000165410/ENSG00000078114/ENSG00000162520/ENSG00000172403/ENSG00000109846/ENSG00000171992/ENSG00000077157/ENSG00000197361/ENSG00000159176/ENSG00000075142/ENSG00000120913/ENSG00000156804/ENSG00000263155/ENSG00000119782/ENSG00000104369/ENSG00000198947/ENSG00000154553/ENSG00000152413…	ANK2/MYOM1/ANK3/MTM1/KAT2B/PGM5/JPH2/CFL2/NEBL/SYNC/SYNPO2/CRYAB/SYNPO/PPP1R12B/FBXL22/CSRP1/SRI/PDLIM2/FBXO32/MYZAP/FKBP1B/JPH1/DMD/PDLIM3/HOMER1/ATP2B4/DES/SLC8A1/MYL9/NEXN/FLNC/DST/FLNB/FERMT2/SORBS2/SLC2A1/PALLD/FLNA/NEB/MYOM3	GO_CC
211	GO:0030055~cell-substrate junction	92	92/2884	412/18950	7.14659e-05	0.00147016	1.46725	ENSG00000168309/ENSG00000077943/ENSG00000129474/ENSG00000088280/ENSG00000022267/ENSG00000154330/ENSG00000162458/ENSG00000100266/ENSG00000172403/ENSG00000187446/ENSG00000064666/ENSG00000120063/ENSG00000116574/ENSG00000159176/ENSG00000090020/ENSG00000198910/ENSG00000130176/ENSG00000026508/ENSG00000145012/ENSG00000120156/ENSG00000150764/ENSG00000137807/ENSG00000148180/ENSG00000172164/ENSG00000120899…	FAM107A/ITGA8/AJUBA/ASAP3/FHL1/PGM5/FBLIM1/PACSIN2/SYNPO2/CHP1/CNN2/GNA13/RHOU/CSRP1/SLC9A1/L1CAM/CNN1/CD44/LPP/TEK/DIXDC1/KIF23/GSN/SNTB1/PTK2B/ILK/LIMS2/HACD3/SVIL/CAPN5/HMGA1/CAV1/MARCKS/LIMA1/DMD/DDR2/NFASC/ITGB7/APBB1IP/TNS4/CAPN2/NOX4/TNS1/FZD1/ITGA2/NEXN/FLNC/AHNAK/TNS2/PLAU/MAPK3/SORBS1/FLRT2/DST/FLNB/GRB7/ERBIN/AKAP12/ITGA4/FERMT2/FERMT1/ITGB3/STARD8/SORBS2/HCK/B2M/NEDD9/MISP/TLN2/FAP/EV…	GO_CC
212	GO:0030667~secretory granule membrane	70	70/2884	296/18950	8.21378e-05	0.00164276	1.55389	ENSG00000118804/ENSG00000204936/ENSG00000167434/ENSG00000108405/ENSG00000135218/ENSG00000118308/ENSG00000174992/ENSG00000069974/ENSG00000100321/ENSG00000116473/ENSG00000166825/ENSG00000220205/ENSG00000172794/ENSG00000068650/ENSG00000075142/ENSG00000079385/ENSG00000075651/ENSG00000139725/ENSG00000026508/ENSG00000122986/ENSG00000150995/ENSG00000105974/ENSG00000103544/ENSG00000104043/ENSG00000163531…	STBD1/CD177/CA4/P2RX1/CD36/LRMP/ZG16/RAB27A/SYNGR1/RAP1A/ANPEP/VAMP2/RAB37/ATP11A/SRI/CEACAM1/PLD1/RHOF/CD44/HVCN1/ITPR1/CAV1/C16orf62/ATP8B4/NFASC/ATP8A1/SLC2A5/IQGAP2/BST1/PCDH7/NCKAP1L/CD33/PLAU/TMEM63A/CR1/LGALS3/ITGAL/MMP25/NBEAL2/CLCA1/CPNE1/HYAL3/CLEC5A/CD38/ATAD3B/ITGB3/STOM/PTPRC/CD14/OLR1/SELP/TBC1D10C/CD53/SLC11A1/SELL/PKP1/SPARC/C3AR1/LAIR1/CCDC136/CYBB/CPE/RAB27B/PIGR/ITGAM/MME/TRPM2…	GO_CC
213	GO:0005788~endoplasmic reticulum lumen	72	72/2884	308/18950	9.65245e-05	0.00187831	1.53602	ENSG00000135437/ENSG00000101938/ENSG00000047457/ENSG00000178031/ENSG00000171951/ENSG00000170962/ENSG00000102265/ENSG00000126759/ENSG00000006118/ENSG00000071073/ENSG00000170476/ENSG00000143382/ENSG00000172831/ENSG00000090530/ENSG00000120885/ENSG00000152583/ENSG00000108379/ENSG00000172828/ENSG00000215018/ENSG00000049449/ENSG00000105246/ENSG00000115363/ENSG00000117385/ENSG00000135052/ENSG00000149257…	RDH5/CHRDL1/CP/ADAMTSL1/SCG2/PDGFD/TIMP1/CFP/TMEM132A/MGAT4A/MZB1/ADAMTSL4/CES2/P3H2/CLU/SPARCL1/WNT3/CES3/COL28A1/RCN1/EBI3/EVA1A/P3H1/GOLM1/SERPINH1/CSF1/PLOD3/UGGT2/ARSA/IL23A/COL4A5/COL10A1/COL1A1/COL11A1/PCSK9/SPON1/COL14A1/F8/COL7A1/KDELC1/B2M/COL4A1/STC2/NOTUM/COL12A1/WNT5B/SHH/CD4/CES1/TSPAN5/FKBP10/COL4A4/BMP4/MELTF/COL5A2/MATN3/COL27A1/COL17A1/COL5A1/P4HA3/SPP1/COL5A3/WNT5A/FSTL3/COL1A2…	GO_CC
214	GO:0000793~condensed chromosome	55	55/2884	221/18950	0.000112407	0.00200042	1.63525	ENSG00000123485/ENSG00000123374/ENSG00000146670/ENSG00000146918/ENSG00000165271/ENSG00000169679/ENSG00000142945/ENSG00000165480/ENSG00000089685/ENSG00000087586/ENSG00000134057/ENSG00000117650/ENSG00000126803/ENSG00000121152/ENSG00000166451/ENSG00000151503/ENSG00000166851/ENSG00000115163/ENSG00000179041/ENSG00000164109/ENSG00000149554/ENSG00000139618/ENSG00000143228/ENSG00000100242/ENSG00000149636…	HJURP/CDK2/CDCA5/NCAPG2/NOL6/BUB1/KIF2C/SKA3/BIRC5/AURKA/CCNB1/NEK2/HSPA2/NCAPH/CENPN/NCAPD3/PLK1/CENPA/RRS1/MAD2L1/CHEK1/BRCA2/NUF2/SUN2/DSN1/FANCD2/TOP2A/SPC25/CCNB1IP1/RASSF2/RCC1/BRCA1/CENPH/CENPF/KNTC1/NCAPG/CBX3/SPDL1/BUB1B/CEBPB/ERCC6L/CENPW/SPAG5/KNSTRN/SPC24/CDT1/SEPT6/SUV39H1/SGO1/BLM/AURKB/CENPE/MKI67/SKA1/CENPK	GO_CC
215	GO:0005925~focal adhesion	89	89/2884	405/18950	0.000167495	0.00267992	1.44394	ENSG00000168309/ENSG00000077943/ENSG00000129474/ENSG00000088280/ENSG00000022267/ENSG00000154330/ENSG00000162458/ENSG00000100266/ENSG00000172403/ENSG00000187446/ENSG00000064666/ENSG00000120063/ENSG00000116574/ENSG00000159176/ENSG00000090020/ENSG00000198910/ENSG00000130176/ENSG00000026508/ENSG00000145012/ENSG00000120156/ENSG00000150764/ENSG00000137807/ENSG00000148180/ENSG00000172164/ENSG00000120899…	FAM107A/ITGA8/AJUBA/ASAP3/FHL1/PGM5/FBLIM1/PACSIN2/SYNPO2/CHP1/CNN2/GNA13/RHOU/CSRP1/SLC9A1/L1CAM/CNN1/CD44/LPP/TEK/DIXDC1/KIF23/GSN/SNTB1/PTK2B/ILK/LIMS2/HACD3/SVIL/CAPN5/HMGA1/CAV1/MARCKS/LIMA1/DDR2/NFASC/ITGB7/APBB1IP/TNS4/CAPN2/NOX4/TNS1/FZD1/ITGA2/NEXN/FLNC/AHNAK/TNS2/PLAU/MAPK3/SORBS1/FLRT2/DST/FLNB/GRB7/AKAP12/ITGA4/FERMT2/FERMT1/ITGB3/STARD8/SORBS2/HCK/B2M/NEDD9/MISP/TLN2/FAP/EVL/TGFB1I1/…	GO_CC
216	GO:0016528~sarcoplasm	25	25/2884	80/18950	0.000230049	0.00345074	2.05335	ENSG00000151150/ENSG00000167323/ENSG00000198523/ENSG00000149596/ENSG00000081189/ENSG00000181856/ENSG00000151320/ENSG00000213366/ENSG00000158125/ENSG00000075142/ENSG00000148180/ENSG00000090530/ENSG00000150995/ENSG00000119782/ENSG00000104369/ENSG00000162004/ENSG00000153956/ENSG00000145349/ENSG00000128591/ENSG00000074370/ENSG00000159399/ENSG00000072952/ENSG00000113296/ENSG00000108551/ENSG00000170624	ANK3/STIM1/PLN/JPH2/MEF2C/SLC2A4/AKAP6/GSTM2/XDH/SRI/GSN/P3H2/ITPR1/FKBP1B/JPH1/CCDC78/CACNA2D1/CAMK2D/FLNC/ATP2A3/HK2/MRVI1/THBS4/RASD1/SGCD	GO_CC
217	GO:0042581~specific granule	41	41/2884	159/18950	0.000361942	0.00482589	1.69434	ENSG00000204936/ENSG00000108405/ENSG00000135218/ENSG00000069974/ENSG00000116473/ENSG00000126759/ENSG00000064666/ENSG00000172794/ENSG00000068650/ENSG00000079385/ENSG00000075651/ENSG00000122986/ENSG00000104043/ENSG00000124406/ENSG00000142583/ENSG00000134516/ENSG00000002726/ENSG00000109743/ENSG00000105383/ENSG00000138772/ENSG00000122861/ENSG00000196187/ENSG00000005844/ENSG00000008516/ENSG00000173083…	CD177/P2RX1/CD36/RAB27A/RAP1A/CFP/CNN2/RAB37/ATP11A/CEACAM1/PLD1/HVCN1/ATP8B4/ATP8A1/SLC2A5/DOCK2/AOC1/BST1/CD33/ANXA3/PLAU/TMEM63A/ITGAL/MMP25/HPSE/CXCL1/CLEC5A/B2M/STOM/CHI3L1/TCN1/OLR1/CD53/C3AR1/LAIR1/CYBB/LCN2/LTF/ITGAM/TRPM2/ADGRG3	GO_CC
218	GO:0016529~sarcoplasmic reticulum	22	22/2884	71/18950	0.000607582	0.00741455	2.036	ENSG00000151150/ENSG00000167323/ENSG00000198523/ENSG00000149596/ENSG00000181856/ENSG00000151320/ENSG00000213366/ENSG00000158125/ENSG00000075142/ENSG00000090530/ENSG00000150995/ENSG00000119782/ENSG00000104369/ENSG00000162004/ENSG00000153956/ENSG00000145349/ENSG00000074370/ENSG00000159399/ENSG00000072952/ENSG00000113296/ENSG00000108551/ENSG00000170624	ANK3/STIM1/PLN/JPH2/SLC2A4/AKAP6/GSTM2/XDH/SRI/P3H2/ITPR1/FKBP1B/JPH1/CCDC78/CACNA2D1/CAMK2D/ATP2A3/HK2/MRVI1/THBS4/RASD1/SGCD	GO_CC
219	GO:0000307~cyclin-dependent protein kinase holoenzyme complex	15	15/2884	42/18950	0.000866722	0.00975062	2.34669	ENSG00000110092/ENSG00000123374/ENSG00000135446/ENSG00000135083/ENSG00000134057/ENSG00000162063/ENSG00000123975/ENSG00000152669/ENSG00000170312/ENSG00000138764/ENSG00000105219/ENSG00000145386/ENSG00000105173/ENSG00000132646/ENSG00000124762	CCND1/CDK2/CDK4/CCNJL/CCNB1/CCNF/CKS2/CCNO/CDK1/CCNG2/CNTD2/CCNA2/CCNE1/PCNA/CDKN1A	GO_CC
220	GO:0005539~glycosaminoglycan binding	86	86/2744	228/17293	7.32327e-16	8.28994e-13	2.37711	ENSG00000163815/ENSG00000133800/ENSG00000180875/ENSG00000168477/ENSG00000154175/ENSG00000105894/ENSG00000145681/ENSG00000184347/ENSG00000103888/ENSG00000066468/ENSG00000275718/ENSG00000188783/ENSG00000157766/ENSG00000026508/ENSG00000079257/ENSG00000112715/ENSG00000145147/ENSG00000154734/ENSG00000105185/ENSG00000010327/ENSG00000105290/ENSG00000138685/ENSG00000140479/ENSG00000002726/ENSG00000132465…	CLEC3B/LYVE1/GREM2/TNXB/ABI3BP/PTN/HAPLN1/SLIT3/CEMIP/FGFR2/CCL15/PRELP/ACAN/CD44/LXN/VEGFA/SLIT2/ADAMTS1/PDCD5/STAB1/APLP1/FGF2/PCSK6/AOC1/JCHAIN/ADGRG1/RSPO3/CFH/FGFRL1/BGN/CCDC80/LIPH/ADA2/PTPRF/LTBP4/NDNF/WISP1/COL11A1/THBS4/DCN/MMP7/ADAMTS8/FGF7/NELL2/SHH/PTPRC/CXCL13/LIPG/TGFBR3/HMMR/PTPRS/FGFR1/COMP/PODXL2/FBLN7/ANOS1/BMP4/SELP/SPOCK2/ECM2/SELL/FGFBP1/CXCL11/NOV/RTN4R/ADAMTSL5/COL5A1/SERPI…	GO_MF
221	GO:0008201~heparin binding	66	66/2744	169/17293	2.54736e-13	1.44181e-10	2.46118	ENSG00000163815/ENSG00000180875/ENSG00000168477/ENSG00000154175/ENSG00000105894/ENSG00000184347/ENSG00000066468/ENSG00000275718/ENSG00000188783/ENSG00000079257/ENSG00000112715/ENSG00000145147/ENSG00000154734/ENSG00000105185/ENSG00000105290/ENSG00000138685/ENSG00000140479/ENSG00000002726/ENSG00000205336/ENSG00000146374/ENSG00000000971/ENSG00000127418/ENSG00000091986/ENSG00000163898/ENSG00000093072…	CLEC3B/GREM2/TNXB/ABI3BP/PTN/SLIT3/FGFR2/CCL15/PRELP/LXN/VEGFA/SLIT2/ADAMTS1/PDCD5/APLP1/FGF2/PCSK6/AOC1/ADGRG1/RSPO3/CFH/FGFRL1/CCDC80/LIPH/ADA2/PTPRF/NDNF/WISP1/COL11A1/THBS4/MMP7/ADAMTS8/FGF7/NELL2/PTPRC/CXCL13/LIPG/TGFBR3/PTPRS/FGFR1/COMP/FBLN7/ANOS1/BMP4/SELP/ECM2/SELL/FGFBP1/CXCL11/NOV/RTN4R/ADAMTSL5/COL5A1/SERPINE2/PGF/GPNMB/THBS2/COL5A3/LTF/CEL/CXCL6/ADAMTS15/BMP7/CXCL10/SAA1/LGR6	GO_MF
222	GO:1901681~sulfur compound binding	85	85/2744	250/17293	9.66241e-13	3.64595e-10	2.14272	ENSG00000163815/ENSG00000180875/ENSG00000168477/ENSG00000154175/ENSG00000105894/ENSG00000184347/ENSG00000076555/ENSG00000066468/ENSG00000213366/ENSG00000275718/ENSG00000188783/ENSG00000079257/ENSG00000116171/ENSG00000112715/ENSG00000145147/ENSG00000198721/ENSG00000154734/ENSG00000105185/ENSG00000105290/ENSG00000152455/ENSG00000197594/ENSG00000173599/ENSG00000180198/ENSG00000164171/ENSG00000138685…	CLEC3B/GREM2/TNXB/ABI3BP/PTN/SLIT3/ACACB/FGFR2/GSTM2/CCL15/PRELP/LXN/SCP2/VEGFA/SLIT2/ECI2/ADAMTS1/PDCD5/APLP1/SUV39H2/ENPP1/PC/RCC1/ITGA2/FGF2/PCSK6/PANK3/AOC1/ADGRG1/ALDH6A1/RSPO3/CFH/FGFRL1/CCDC80/LIPH/PRMT1/ADA2/ACOT11/PTPRF/NDNF/WISP1/COL11A1/THBS4/GSTM4/MMP7/ADAMTS8/FGF7/NELL2/CHST15/PTPRC/CXCL13/LIPG/TGFBR3/PTPRS/FGFR1/COMP/FBLN7/ANOS1/GSTP1/BMP4/SELP/ECM2/OGDHL/SELL/FGFBP1/CXCL11/NOV/RTN4…	GO_MF
223	GO:0005201~extracellular matrix structural constituent	61	61/2744	163/17293	1.71422e-11	4.85123e-09	2.35846	ENSG00000168477/ENSG00000154175/ENSG00000101955/ENSG00000143196/ENSG00000138722/ENSG00000138615/ENSG00000145681/ENSG00000101680/ENSG00000127951/ENSG00000197614/ENSG00000120708/ENSG00000164176/ENSG00000148357/ENSG00000188783/ENSG00000157766/ENSG00000166482/ENSG00000140092/ENSG00000215018/ENSG00000132561/ENSG00000182492/ENSG00000111341/ENSG00000188153/ENSG00000115380/ENSG00000123500/ENSG00000090006…	TNXB/ABI3BP/SRPX/DPT/MMRN1/CILP/HAPLN1/LAMA1/FGL2/MFAP5/TGFBI/EDIL3/HMCN2/PRELP/ACAN/MFAP4/FBLN5/COL28A1/MATN2/BGN/MGP/COL4A5/EFEMP1/COL10A1/LTBP4/FBLN1/COL1A1/COL11A1/SPON1/DCN/COL14A1/CTHRC1/COL7A1/MMRN2/THSD4/COL4A1/LAMA2/COL12A1/FBLN2/CD4/CHI3L1/MFAP2/COMP/ZP3/ANOS1/COL4A4/PODN/MUC4/SRPX2/COL5A2/MATN3/SPARC/COL27A1/COL17A1/COL5A1/THBS2/COL5A3/COL1A2/COL8A1/COL9A3/MUC5AC	GO_MF
224	GO:0005125~cytokine activity	69	69/2744	220/17293	6.40902e-09	1.451e-06	1.97657	ENSG00000180875/ENSG00000107562/ENSG00000105989/ENSG00000171951/ENSG00000141574/ENSG00000172349/ENSG00000153162/ENSG00000112175/ENSG00000102265/ENSG00000181374/ENSG00000125845/ENSG00000275718/ENSG00000130513/ENSG00000172724/ENSG00000121858/ENSG00000151882/ENSG00000112715/ENSG00000122641/ENSG00000170293/ENSG00000137077/ENSG00000239697/ENSG00000157168/ENSG00000105246/ENSG00000138685/ENSG00000181634…	GREM2/CXCL12/WNT2/SCG2/SECTM1/IL16/BMP6/BMP5/TIMP1/CCL13/BMP2/CCL15/GDF15/CCL19/TNFSF10/CCL28/VEGFA/INHBA/CMTM8/CCL21/TNFSF12/NRG1/EBI3/FGF2/TNFSF15/CSF1/KITLG/TNFSF13/IL11/LIF/IL23A/CCL11/CXCL1/CCL5/CXCL3/CMTM7/CXCL13/IL18/LTB/CXCL8/C10orf99/BMP4/IL1A/TNFSF9/CXCL11/CXCL2/FAM3D/MIF/CTF1/AREG/CXCL5/TNFSF14/SPP1/OSM/WNT5A/FAM19A5/TNFSF11/CSF3/CXCL6/IL1RN/INHBB/CCL20/BMP7/LEFTY1/CCL24/CXCL10/TNFRSF1…	GO_MF
225	GO:0008081~phosphoric diester hydrolase activity	38	38/2744	94/17293	9.3063e-09	1.75579e-06	2.54766	ENSG00000187091/ENSG00000130055/ENSG00000186642/ENSG00000172594/ENSG00000154822/ENSG00000138193/ENSG00000102886/ENSG00000166311/ENSG00000073417/ENSG00000154889/ENSG00000005249/ENSG00000160191/ENSG00000197943/ENSG00000111802/ENSG00000138735/ENSG00000154678/ENSG00000100292/ENSG00000172572/ENSG00000075651/ENSG00000168398/ENSG00000113448/ENSG00000136960/ENSG00000161714/ENSG00000197594/ENSG00000103056…	PLCD1/GDPD2/PDE2A/SMPDL3A/PLCL2/PLCE1/GDPD3/SMPD1/PDE8A/MPPE1/PRKAR2B/PDE9A/PLCG2/TDP2/PDE5A/PDE1C/HMOX1/PDE3A/PLD1/BDKRB2/PDE4D/ENPP2/PLCD3/ENPP1/SMPD3/PDE1A/PDE1B/PLCD4/CCL5/PLCL1/GDPD5/PLD4/PDE4C/NOTUM/ENPP3/EDNRA/CCR5/F2RL2	GO_MF
226	GO:0050840~extracellular matrix binding	25	25/2744	56/17293	3.29257e-07	5.32455e-05	2.81344	ENSG00000120708/ENSG00000112715/ENSG00000145147/ENSG00000152583/ENSG00000164171/ENSG00000163131/ENSG00000205336/ENSG00000074527/ENSG00000182492/ENSG00000185585/ENSG00000131981/ENSG00000060718/ENSG00000087085/ENSG00000011465/ENSG00000176435/ENSG00000259207/ENSG00000179954/ENSG00000163520/ENSG00000164690/ENSG00000107742/ENSG00000113140/ENSG00000118785/ENSG00000124466/ENSG00000172061/ENSG00000166106	TGFBI/VEGFA/SLIT2/SPARCL1/ITGA2/CTSS/ADGRG1/NTN4/BGN/OLFML2A/LGALS3/COL11A1/ACHE/DCN/CLEC14A/ITGB3/SSC5D/FBLN2/SHH/SPOCK2/SPARC/SPP1/LYPD3/LRRC15/ADAMTS15	GO_MF
227	GO:0048018~receptor ligand activity	117	117/2744	483/17293	9.35767e-07	0.000132411	1.5266	ENSG00000160712/ENSG00000180875/ENSG00000197273/ENSG00000137872/ENSG00000105894/ENSG00000146469/ENSG00000124205/ENSG00000107562/ENSG00000105989/ENSG00000010319/ENSG00000171951/ENSG00000141574/ENSG00000172349/ENSG00000170962/ENSG00000153162/ENSG00000112175/ENSG00000092421/ENSG00000102265/ENSG00000181374/ENSG00000125845/ENSG00000275718/ENSG00000130513/ENSG00000172724/ENSG00000183742/ENSG00000121858…	IL6R/GREM2/GUCA2A/SEMA6D/PTN/VIP/EDN3/CXCL12/WNT2/SEMA3G/SCG2/SECTM1/IL16/PDGFD/BMP6/BMP5/SEMA6A/TIMP1/CCL13/BMP2/CCL15/GDF15/CCL19/MACC1/TNFSF10/CCL28/VEGFA/INHBA/CMTM8/APLN/NMB/WNT3/CCL21/C1QTNF12/TNFSF12/RETNLB/NRG1/EFNA5/EBI3/WNT9A/FGF2/TNFSF15/CSF1/SEMA4G/KITLG/ADA2/TNFSF13/LGALS3/ERFE/IL11/LIF/IL23A/CCL11/EFEMP1/FLRT2/GMFG/CXCL1/THBS4/FGF13/JAG2/CCL5/TGFA/CXCL3/STC1/FGF7/STC2/TG/CMTM7/SHH/C…	GO_MF
228	GO:0019199~transmembrane receptor protein kinase activity	29	29/2744	79/17293	5.24412e-06	0.000494695	2.31343	ENSG00000105976/ENSG00000157404/ENSG00000066468/ENSG00000120156/ENSG00000196411/ENSG00000139567/ENSG00000062524/ENSG00000183317/ENSG00000162733/ENSG00000123612/ENSG00000127418/ENSG00000171243/ENSG00000115380/ENSG00000090006/ENSG00000182578/ENSG00000148053/ENSG00000134853/ENSG00000167601/ENSG00000165731/ENSG00000116106/ENSG00000092445/ENSG00000069702/ENSG00000077782/ENSG00000182580/ENSG00000143590…	MET/KIT/FGFR2/TEK/EPHB4/ACVRL1/LTK/EPHA10/DDR2/ACVR1C/FGFRL1/SOSTDC1/EFEMP1/LTBP4/CSF1R/NTRK2/PDGFRA/AXL/RET/EPHA4/TYRO3/TGFBR3/FGFR1/EPHB3/EFNA3/EPHA3/EPHB6/ROR2/EPHB1	GO_MF
229	GO:0003779~actin binding	103	103/2744	430/17293	6.96556e-06	0.000606539	1.50958	ENSG00000168309/ENSG00000101605/ENSG00000171617/ENSG00000129474/ENSG00000082397/ENSG00000146122/ENSG00000006747/ENSG00000198771/ENSG00000156113/ENSG00000163431/ENSG00000176438/ENSG00000165410/ENSG00000078114/ENSG00000011426/ENSG00000172403/ENSG00000064666/ENSG00000171992/ENSG00000144821/ENSG00000106299/ENSG00000165959/ENSG00000065534/ENSG00000165995/ENSG00000089327/ENSG00000173898/ENSG00000079385…	FAM107A/MYOM1/ENC1/AJUBA/EPB41L3/DAAM2/SCIN/RCSD1/KCNMA1/LMOD1/SYNE3/CFL2/NEBL/ANLN/SYNPO2/CNN2/SYNPO/MYH15/WASL/CLMN/MYLK/CACNB2/FXYD5/SPTBN2/CEACAM1/PDLIM2/CNN1/MYH11/DIXDC1/GSN/SNTB1/PLS1/DIAPH3/SVIL/ACTR3B/CGN/MARCKS/GAS7/LIMA1/DMD/PRKN/SYNE1/TNS4/PDLIM3/LSP1/TNS1/CAP2/KIF18A/MYO1A/MYO1D/SHROOM3/IQGAP2/NEXN/LRRK2/MAP1B/FLNC/VILL/CORO2A/WAS/TPM1/MYO5A/AIF1/HCLS1/SORBS1/TRPC6/TMOD2/DST/GMFG/FLN…	GO_MF
230	GO:0038024~cargo receptor activity	30	30/2744	85/17293	9.07176e-06	0.000733517	2.22428	ENSG00000168079/ENSG00000177675/ENSG00000135218/ENSG00000165457/ENSG00000157193/ENSG00000158270/ENSG00000137486/ENSG00000168077/ENSG00000136960/ENSG00000010327/ENSG00000184730/ENSG00000184012/ENSG00000197594/ENSG00000138131/ENSG00000260314/ENSG00000137251/ENSG00000147852/ENSG00000134013/ENSG00000165029/ENSG00000164099/ENSG00000177575/ENSG00000106327/ENSG00000179954/ENSG00000154269/ENSG00000141505…	SCARA5/CD163L1/CD36/FOLR2/LRP8/COLEC12/ARRB1/SCARA3/ENPP2/STAB1/APOBR/TMPRSS2/ENPP1/LOXL4/MRC1/TINAG/VLDLR/LOXL2/ABCA1/PRSS12/CD163/TFR2/SSC5D/ENPP3/ASGR1/TMPRSS13/TMPRSS3/SUSD2/ITGAM/MARCO	GO_MF
231	GO:0005178~integrin binding	40	40/2744	132/17293	2.27469e-05	0.00143053	1.90973	ENSG00000204936/ENSG00000168477/ENSG00000105894/ENSG00000164283/ENSG00000107562/ENSG00000120708/ENSG00000164176/ENSG00000160593/ENSG00000198759/ENSG00000166333/ENSG00000166086/ENSG00000076662/ENSG00000140092/ENSG00000139626/ENSG00000157168/ENSG00000164171/ENSG00000138685/ENSG00000151914/ENSG00000090006/ENSG00000104415/ENSG00000113296/ENSG00000134917/ENSG00000259207/ENSG00000078098/ENSG00000150637…	CD177/TNXB/PTN/ESM1/CXCL12/TGFBI/EDIL3/JAML/EGFL6/ILK/JAM3/ICAM3/FBLN5/ITGB7/NRG1/ITGA2/FGF2/DST/LTBP4/WISP1/THBS4/ADAMTS8/ITGB3/FAP/CD226/FERMT3/ADAM23/COMP/THY1/SFRP2/VCAM1/ECM2/NOV/LCP1/COL5A1/SPP1/GPNMB/FRMD5/ITGBL1/IL1B	GO_MF
232	GO:0019838~growth factor binding	41	41/2744	137/17293	2.50832e-05	0.00149443	1.88603	ENSG00000113594/ENSG00000160712/ENSG00000105894/ENSG00000164283/ENSG00000135218/ENSG00000167779/ENSG00000112964/ENSG00000066468/ENSG00000064300/ENSG00000115590/ENSG00000120156/ENSG00000129667/ENSG00000139567/ENSG00000134352/ENSG00000123612/ENSG00000110324/ENSG00000140479/ENSG00000137070/ENSG00000175899/ENSG00000127418/ENSG00000174004/ENSG00000090006/ENSG00000108821/ENSG00000104415/ENSG00000148053…	LIFR/IL6R/PTN/ESM1/CD36/IGFBP6/GHR/FGFR2/NGFR/IL1R2/TEK/RHBDF2/ACVRL1/IL6ST/ACVR1C/IL10RA/PCSK6/IL11RA/A2M/FGFRL1/NRROS/LTBP4/COL1A1/WISP1/NTRK2/ITGB3/PDGFRA/COL4A1/NKD2/IL1R1/CXCL13/TGFBR3/FGFR1/DUSP1/IL2RB/SRPX2/FGFBP1/NOV/COL5A1/COL1A2/IL1RN	GO_MF
233	GO:0005518~collagen binding	24	24/2744	67/17293	5.27624e-05	0.00248971	2.25747	ENSG00000154175/ENSG00000120708/ENSG00000026508/ENSG00000152583/ENSG00000162733/ENSG00000164171/ENSG00000101665/ENSG00000163131/ENSG00000117385/ENSG00000205336/ENSG00000149257/ENSG00000087085/ENSG00000011465/ENSG00000187955/ENSG00000164620/ENSG00000105664/ENSG00000174348/ENSG00000107742/ENSG00000106823/ENSG00000113140/ENSG00000080573/ENSG00000137809/ENSG00000172061/ENSG00000262406	ABI3BP/TGFBI/CD44/SPARCL1/DDR2/ITGA2/SMAD7/CTSS/P3H1/ADGRG1/SERPINH1/ACHE/DCN/COL14A1/RELL2/COMP/PODN/SPOCK2/ECM2/SPARC/COL5A3/ITGA11/LRRC15/MMP12	GO_MF
234	GO:0030246~carbohydrate binding	67	67/2744	270/17293	8.73943e-05	0.00372791	1.56386	ENSG00000163815/ENSG00000118804/ENSG00000169764/ENSG00000132514/ENSG00000150471/ENSG00000090659/ENSG00000174992/ENSG00000171916/ENSG00000100079/ENSG00000111796/ENSG00000158270/ENSG00000090402/ENSG00000131386/ENSG00000012124/ENSG00000119514/ENSG00000088827/ENSG00000241399/ENSG00000157766/ENSG00000168077/ENSG00000171747/ENSG00000170298/ENSG00000090530/ENSG00000140263/ENSG00000139629/ENSG00000136960…	CLEC3B/STBD1/UGP2/CLEC10A/ADGRL3/CD209/ZG16/LGALS9C/LGALS2/KLRB1/COLEC12/SI/GALNT15/CD22/GALNT12/SIGLEC1/CD302/ACAN/SCARA3/LGALS4/LGALS9B/P3H2/SORD/GALNT6/ENPP2/ITLN1/ENPP1/SLC2A5/MRC1/P3H1/PHYH/CD33/GALNT17/TINAG/PLOD3/LGALS3/HK2/CD69/CLEC5A/ADGRL2/CLEC14A/LOXL2/FCN1/GALK1/CRYBG3/CHI3L1/LGALS9/CLEC2B/SIGLEC10/ZP3/PLOD2/ENPP3/OLR1/CLEC1A/SELP/ASGR1/SELL/GALNT8/P4HA3/SUSD2/EGLN3/SIGLEC7/KLRD1/REG1…	GO_MF
235	GO:0017080~sodium channel regulator activity	15	15/2744	34/17293	8.89167e-05	0.00372791	2.78034	ENSG00000177098/ENSG00000152642/ENSG00000118515/ENSG00000137726/ENSG00000049759/ENSG00000089327/ENSG00000105711/ENSG00000145349/ENSG00000058668/ENSG00000101049/ENSG00000169174/ENSG00000129682/ENSG00000089356/ENSG00000052344/ENSG00000160183	SCN4B/GPD1L/SGK1/FXYD6/NEDD4L/FXYD5/SCN1B/CAMK2D/ATP2B4/SGK2/PCSK9/FGF13/FXYD3/PRSS8/TMPRSS3	GO_MF
236	GO:0072341~modified amino acid binding	28	28/2744	87/17293	0.000117226	0.00473927	2.02827	ENSG00000136044/ENSG00000168497/ENSG00000165457/ENSG00000006747/ENSG00000149596/ENSG00000187583/ENSG00000213366/ENSG00000086991/ENSG00000169710/ENSG00000137501/ENSG00000214078/ENSG00000168765/ENSG00000132718/ENSG00000076351/ENSG00000167601/ENSG00000015413/ENSG00000084207/ENSG00000167914/ENSG00000011347/ENSG00000186074/ENSG00000149043/ENSG00000134184/ENSG00000134202/ENSG00000196549/ENSG00000116141…	APPL2/CAVIN2/FOLR2/SCIN/JPH2/PLEKHN1/GSTM2/NOX4/FASN/SYTL2/CPNE1/GSTM4/SYT11/SLC46A1/AXL/DPEP1/GSTP1/GSDMA/SYT7/CD300LF/SYT8/GSTM1/GSTM3/MME/MARK1/SYT1/SYT13/GPR143	GO_MF
237	GO:0004713~protein tyrosine kinase activity	38	38/2744	134/17293	0.000171867	0.0062759	1.78717	ENSG00000070759/ENSG00000102010/ENSG00000060140/ENSG00000105976/ENSG00000157404/ENSG00000066468/ENSG00000104312/ENSG00000127334/ENSG00000120156/ENSG00000196411/ENSG00000120899/ENSG00000165304/ENSG00000010671/ENSG00000062524/ENSG00000183317/ENSG00000162733/ENSG00000007264/ENSG00000127418/ENSG00000112742/ENSG00000108984/ENSG00000115380/ENSG00000182578/ENSG00000148053/ENSG00000134853/ENSG00000167601…	TESK2/BMX/STYK1/MET/KIT/FGFR2/RIPK2/DYRK2/TEK/EPHB4/PTK2B/MELK/BTK/LTK/EPHA10/DDR2/MATK/FGFRL1/TTK/MAP2K6/EFEMP1/CSF1R/NTRK2/PDGFRA/AXL/RET/HCK/EPHA4/TYRO3/FGFR1/EPHB3/EFNA3/ITK/EPHA3/EPHB6/ROR2/SRMS/EPHB1	GO_MF
238	GO:0033218~amide binding	80	80/2744	346/17293	0.00024197	0.00849357	1.45714	ENSG00000139433/ENSG00000183134/ENSG00000099139/ENSG00000135218/ENSG00000078596/ENSG00000103257/ENSG00000090659/ENSG00000165457/ENSG00000096384/ENSG00000076555/ENSG00000112964/ENSG00000158473/ENSG00000072657/ENSG00000103888/ENSG00000166825/ENSG00000169418/ENSG00000109846/ENSG00000182481/ENSG00000064300/ENSG00000213366/ENSG00000170075/ENSG00000136160/ENSG00000100739/ENSG00000107282/ENSG00000135916…	GLTP/PTGDR2/PCSK5/CD36/ITM2A/SLC7A5/CD209/FOLR2/HSP90AB1/ACACB/GHR/CD1D/TRHDE/CEMIP/ANPEP/NPR1/CRYAB/KPNA2/NGFR/GSTM2/GPR37L1/EDNRB/BDKRB1/APBA1/ITM2C/NOLC1/CLIP3/SCP2/PPIL1/APBB1/LEPR/INHBA/ECI2/CLU/RXRA/VIPR1/OXTR/PLEKHA8P1/FZD5/ECE1/PC/ITGA2/SSTR1/PANK3/CPTP/FASN/ALDH6A1/IPO4/ACOT11/NQO2/GRIN2B/TLR1/GSTM4/ACHE/SLC46A1/FCGR2B/NMUR1/C1QA/EPHA4/BACE2/LDLRAD3/TLR6/CD14/GSTP1/ATP1A3/RTN4R/TMEM158/C…	GO_MF
239	GO:0016641~oxidoreductase activity, acting on the CH-NH2 group of donors, oxygen as acceptor	9	2744-09-01	16/17293	0.000247604	0.00849357	3.54494	ENSG00000069535/ENSG00000131471/ENSG00000189221/ENSG00000138131/ENSG00000002726/ENSG00000134013/ENSG00000162692/ENSG00000184719/ENSG00000203797	MAOB/AOC3/MAOA/LOXL4/AOC1/LOXL2/VCAM1/RNLS/DDO	GO_MF
240	GO:0017147~Wnt-protein binding	15	15/2744	37/17293	0.000279602	0.00930912	2.55491	ENSG00000105976/ENSG00000122707/ENSG00000163251/ENSG00000185483/ENSG00000157240/ENSG00000164932/ENSG00000167601/ENSG00000162998/ENSG00000092445/ENSG00000269113/ENSG00000145423/ENSG00000104290/ENSG00000169071/ENSG00000106483/ENSG00000154856	MET/RECK/FZD5/ROR1/FZD1/CTHRC1/AXL/FRZB/TYRO3/TRABD2B/SFRP2/FZD3/ROR2/SFRP4/APCDD1	GO_MF
241	hsa04640~Hematopoietic cell lineage	43	43/1321	95/7806	8.68099e-11	2.7866e-08	2.67467			KEGG
242	hsa05323~Rheumatoid arthritis	35	35/1321	89/7806	3.67662e-07	5.90097e-05	2.32383			KEGG
243	hsa04061~Viral protein interaction with cytokine and cytokine receptor	36	36/1321	98/7806	1.74308e-06	0.000186509	2.17071			KEGG
244	hsa04060~Cytokine-cytokine receptor interaction	80	80/1321	291/7806	2.83532e-06	0.000227535	1.62451			KEGG
245	hsa04110~Cell cycle	40	40/1321	124/7806	1.89049e-05	0.0012137	1.90618			KEGG
246	hsa04514~Cell adhesion molecules (CAMs)	44	44/1321	142/7806	2.29285e-05	0.00122667	1.83101			KEGG
247	hsa04974~Protein digestion and absorption	32	32/1321	95/7806	4.92062e-05	0.00225645	1.99045			KEGG
248	hsa05205~Proteoglycans in cancer	55	55/1321	200/7806	0.000100165	0.00401911	1.62502			KEGG
249	hsa04062~Chemokine signaling pathway	52	52/1321	187/7806	0.000112823	0.00402401	1.64319			KEGG
250	hsa04610~Complement and coagulation cascades	28	28/1321	84/7806	0.000175494	0.00537641	1.96972			KEGG
251	hsa03320~PPAR signaling pathway	26	26/1321	76/7806	0.000184239	0.00537641	2.02155			KEGG
252	hsa04151~PI3K-Akt signaling pathway	83	83/1321	352/7806	0.000661872	0.0161223	1.39335			KEGG
253	hsa05144~Malaria	18	18/1321	49/7806	0.00067479	0.0161223	2.17071			KEGG
254	hsa04310~Wnt signaling pathway	43	43/1321	158/7806	0.000703155	0.0161223	1.60819			KEGG
255	hsa05150~Staphylococcus aureus infection	27	27/1321	89/7806	0.00120064	0.0256936	1.79267			KEGG
256	hsa04933~AGE-RAGE signaling pathway in diabetic complications	29	29/1321	100/7806	0.00175826	0.0348876	1.71366			KEGG
257	hsa04940~Type I diabetes mellitus	15	15/1321	41/7806	0.00194856	0.0348876	2.16189			KEGG
258	hsa00330~Arginine and proline metabolism	17	17/1321	49/7806	0.00195632	0.0348876	2.05012			KEGG
259	hsa05215~Prostate cancer	28	28/1321	97/7806	0.00225628	0.0375828	1.70574			KEGG
260	hsa04978~Mineral absorption	19	19/1321	58/7806	0.00234161	0.0375828	1.93576			KEGG
261	hsa04611~Platelet activation	33	33/1321	121/7806	0.00270046	0.0412785	1.61159			KEGG
262	hsa04115~p53 signaling pathway	22	22/1321	72/7806	0.00298602	0.0434761	1.80558			KEGG
263	hsa04666~Fc gamma R-mediated phagocytosis	26	26/1321	90/7806	0.00314566	0.0434761	1.70709			KEGG
264	hsa04015~Rap1 signaling pathway	51	51/1321	209/7806	0.00330285	0.0434761	1.44195			KEGG
265	hsa04360~Axon guidance	45	45/1321	180/7806	0.00343931	0.0434761	1.47729			KEGG
266	hsa04010~MAPK signaling pathway	68	68/1321	295/7806	0.00357769	0.0434761	1.36211			KEGG
267	hsa04064~NF-kappa B signaling pathway	28	28/1321	100/7806	0.00365687	0.0434761	1.65456			KEGG
268	hsa04512~ECM-receptor interaction	25	25/1321	87/7806	0.00404002	0.046316	1.69803			KEGG
269	hsa04972~Pancreatic secretion	28	28/1321	101/7806	0.00426291	0.0471861	1.63818			KEGG
270	hsa04510~Focal adhesion	48	48/1321	197/7806	0.00442107	0.0473055	1.4398			KEGG
271	hsa04020~Calcium signaling pathway	46	46/1321	189/7806	0.00537169	0.0540814	1.43821			KEGG
272	hsa05217~Basal cell carcinoma	19	19/1321	62/7806	0.0053913	0.0540814	1.81087			KEGG
273	hsa05332~Graft-versus-host disease	13	13/1321	37/7806	0.00571094	0.0547992	2.07619			KEGG
274	hsa05414~Dilated cardiomyopathy (DCM)	26	26/1321	94/7806	0.00594867	0.0547992	1.63445			KEGG
275	hsa04924~Renin secretion	20	20/1321	67/7806	0.00605168	0.0547992	1.76393			KEGG
276	hsa05412~Arrhythmogenic right ventricular cardiomyopathy (ARVC)	22	22/1321	76/7806	0.0061457	0.0547992	1.71055			KEGG
277	hsa05321~Inflammatory bowel disease (IBD)	19	19/1321	63/7806	0.00652401	0.0560669	1.78213			KEGG
278	hsa05166~Human T-cell leukemia virus 1 infection	51	51/1321	216/7806	0.00663721	0.0560669	1.39522			KEGG
279	hsa04672~Intestinal immune network for IgA production	15	15/1321	46/7806	0.00683759	0.0562786	1.9269			KEGG
280	hsa05020~Prion diseases	12	12/1321	35/7806	0.00968264	0.0777032	2.026			KEGG
281	hsa04371~Apelin signaling pathway	34	34/1321	136/7806	0.0101238	0.0792616	1.47729			KEGG
282	hsa01212~Fatty acid metabolism	17	17/1321	57/7806	0.011013	0.0832811	1.76238			KEGG
283	hsa00071~Fatty acid degradation	14	14/1321	44/7806	0.011156	0.0832811	1.88019			KEGG
284	hsa04350~TGF-beta signaling pathway	25	25/1321	94/7806	0.011647	0.0849705	1.57159			KEGG
285	hsa03030~DNA replication	12	12/1321	36/7806	0.01234	0.0871325	1.96972			KEGG
286	hsa04659~Th17 cell differentiation	27	27/1321	104/7806	0.0124863	0.0871325	1.53411			KEGG
287	hsa05146~Amoebiasis	26	26/1321	100/7806	0.0137861	0.093952	1.53638			KEGG
288	hsa04976~Bile secretion	20	20/1321	72/7806	0.0140489	0.093952	1.64143			KEGG
289	hsa04022~cGMP-PKG signaling pathway	39	39/1321	164/7806	0.0144327	0.0940768	1.40523			KEGG
290	hsa04975~Fat digestion and absorption	13	13/1321	41/7806	0.0146537	0.0940768	1.87364			KEGG
291	hsa04914~Progesterone-mediated oocyte maturation	25	25/1321	96/7806	0.0152249	0.0958271	1.53884			KEGG
292	hsa04670~Leukocyte transendothelial migration	28	28/1321	111/7806	0.0163815	0.0994581	1.4906			KEGG
293	hsa00920~Sulfur metabolism	5	5/1321	7806-10-01	0.0164214	0.0994581	2.95458			KEGG
294	hsa00983~Drug metabolism - other enzymes	21	21/1321	78/7806	0.0172001	0.100607	1.59093			KEGG
295	hsa05226~Gastric cancer	35	35/1321	146/7806	0.0175193	0.100607	1.41658			KEGG
296	hsa04921~Oxytocin signaling pathway	36	36/1321	151/7806	0.0175515	0.100607	1.40881			KEGG
297	hsa00982~Drug metabolism - cytochrome P450	19	19/1321	69/7806	0.0180032	0.101386	1.62716			KEGG
298	hsa04934~Cushing syndrome	36	36/1321	152/7806	0.0193722	0.107215	1.39954			KEGG
299	hsa00565~Ether lipid metabolism	14	14/1321	47/7806	0.020255	0.10891	1.76018			KEGG
300	hsa04014~Ras signaling pathway	51	51/1321	229/7806	0.020357	0.10891	1.31601			KEGG
301	hsa04145~Phagosome	35	35/1321	148/7806	0.0213766	0.112425	1.39744			KEGG
302	hsa04657~IL-17 signaling pathway	24	24/1321	94/7806	0.0217144	0.112425	1.50872			KEGG
303	hsa04916~Melanogenesis	25	25/1321	99/7806	0.022172	0.112971	1.49221			KEGG
304	hsa00250~Alanine, aspartate and glutamate metabolism	11	11/1321	35/7806	0.0254464	0.126325	1.85716			KEGG
305	hsa05145~Toxoplasmosis	27	27/1321	110/7806	0.0255799	0.126325	1.45043			KEGG
306	hsa04270~Vascular smooth muscle contraction	31	31/1321	130/7806	0.0260739	0.126814	1.40911			KEGG
307	hsa05204~Chemical carcinogenesis	20	20/1321	77/7806	0.0287156	0.137578	1.53485			KEGG
308	hsa05219~Bladder cancer	12	12/1321	41/7806	0.0346484	0.163561	1.72951			KEGG
309	hsa05133~Pertussis	19	19/1321	74/7806	0.0362547	0.166472	1.51722			KEGG
310	hsa01521~EGFR tyrosine kinase inhibitor resistance	20	20/1321	79/7806	0.0370523	0.166472	1.49599			KEGG
311	hsa05032~Morphine addiction	22	22/1321	89/7806	0.0381726	0.166472	1.46069			KEGG
312	hsa05410~Hypertrophic cardiomyopathy (HCM)	22	22/1321	89/7806	0.0381726	0.166472	1.46069			KEGG
313	hsa04750~Inflammatory mediator regulation of TRP channels	24	24/1321	99/7806	0.0387821	0.166472	1.43252			KEGG
314	hsa04919~Thyroid hormone signaling pathway	28	28/1321	119/7806	0.0389086	0.166472	1.39039			KEGG
315	hsa00830~Retinol metabolism	17	17/1321	65/7806	0.0391206	0.166472	1.54547			KEGG
316	hsa05225~Hepatocellular carcinoma	37	37/1321	165/7806	0.0394139	0.166472	1.32508			KEGG
317	hsa05221~Acute myeloid leukemia	17	17/1321	66/7806	0.0446935	0.18632	1.52206			KEGG
318	hsa04725~Cholinergic synapse	26	26/1321	111/7806	0.0476208	0.188803	1.38413			KEGG
319	hsa04713~Circadian entrainment	23	23/1321	96/7806	0.0478377	0.188803	1.41574			KEGG
320	hsa05142~Chagas disease (American trypanosomiasis)	24	24/1321	101/7806	0.0478567	0.188803	1.40416			KEGG
321	hsa05134~Legionellosis	15	15/1321	57/7806	0.0482299	0.188803	1.55504			KEGG
322	hsa05416~Viral myocarditis	15	15/1321	57/7806	0.0482299	0.188803	1.55504			KEGG
323	hsa00040~Pentose and glucuronate interconversions	10	10/1321	34/7806	0.0498627	0.192401	1.73799			KEGG
324	hsa04810~Regulation of actin cytoskeleton	45	45/1321	210/7806	0.050348	0.192401	1.26625			KEGG
325	hsa01524~Platinum drug resistance	18	18/1321	72/7806	0.0516656	0.195113	1.47729			KEGG
326	hsa05222~Small cell lung cancer	22	22/1321	92/7806	0.0530723	0.198096	1.41306			KEGG
327	hsa04550~Signaling pathways regulating pluripotency of stem cells	31	31/1321	138/7806	0.0545449	0.201252	1.32742			KEGG
328	hsa00230~Purine metabolism	29	29/1321	128/7806	0.0558719	0.203806	1.33879			KEGG
329	hsa00980~Metabolism of xenobiotics by cytochrome P450	18	18/1321	73/7806	0.058162	0.207444	1.45705			KEGG
330	hsa05140~Leishmaniasis	18	18/1321	73/7806	0.058162	0.207444	1.45705			KEGG
331	hsa05330~Allograft rejection	10	10/1321	35/7806	0.0596293	0.210341	1.68833			KEGG
332	hsa04928~Parathyroid hormone synthesis, secretion and action	24	24/1321	104/7806	0.0642141	0.224051	1.36365			KEGG
333	hsa00512~Mucin type O-glycan biosynthesis	9	9/1321	31/7806	0.0658514	0.227294	1.71556			KEGG
334	hsa05224~Breast cancer	32	32/1321	146/7806	0.0684433	0.233727	1.29516			KEGG
335	hsa05202~Transcriptional misregulation in cancer	39	39/1321	183/7806	0.0694855	0.234788	1.25933			KEGG
336	hsa04390~Hippo signaling pathway	33	33/1321	152/7806	0.0725627	0.240275	1.28291			KEGG
337	hsa01040~Biosynthesis of unsaturated fatty acids	8	8/1321	27/7806	0.0726065	0.240275	1.75086			KEGG
338	hsa04261~Adrenergic signaling in cardiomyocytes	32	32/1321	147/7806	0.0738789	0.241991	1.28635			KEGG
339	hsa04964~Proximal tubule bicarbonate reclamation	7	7/1321	23/7806	0.0798216	0.255941	1.79844			KEGG
340	hsa05210~Colorectal cancer	20	20/1321	86/7806	0.0801664	0.255941	1.37422			KEGG
341	hsa04960~Aldosterone-regulated sodium reabsorption	10	10/1321	37/7806	0.0826722	0.255941	1.59707			KEGG
342	hsa05216~Thyroid cancer	10	10/1321	37/7806	0.0826722	0.255941	1.59707			KEGG
343	hsa05152~Tuberculosis	37	37/1321	175/7806	0.0828871	0.255941	1.24937			KEGG
344	hsa04668~TNF signaling pathway	25	25/1321	112/7806	0.0829216	0.255941	1.31901			KEGG
345	hsa04024~cAMP signaling pathway	44	44/1321	213/7806	0.0859911	0.262887	1.22067			KEGG
346	hsa05310~Asthma	8	8/1321	28/7806	0.0872265	0.264148	1.68833			KEGG
347	hsa05165~Human papillomavirus infection	65	65/1321	328/7806	0.0898415	0.269524	1.17102			KEGG
348	hsa04380~Osteoclast differentiation	27	27/1321	124/7806	0.0942485	0.273338	1.28667			KEGG
349	hsa03008~Ribosome biogenesis in eukaryotes	22	22/1321	98/7806	0.0943765	0.273338	1.32655			KEGG
350	hsa05231~Choline metabolism in cancer	22	22/1321	98/7806	0.0943765	0.273338	1.32655			KEGG
351	hsa05163~Human cytomegalovirus infection	45	45/1321	220/7806	0.0945189	0.273338	1.20869			KEGG
352	hsa04727~GABAergic synapse	20	20/1321	88/7806	0.0969242	0.275333	1.34299			KEGG
353	hsa04970~Salivary secretion	20	20/1321	88/7806	0.0969242	0.275333	1.34299			KEGG
354	hsa04530~Tight junction	35	35/1321	167/7806	0.0987778	0.276532	1.23845			KEGG
355	hsa04662~B cell receptor signaling pathway	18	18/1321	78/7806	0.0990691	0.276532	1.36365			KEGG
356	hsa04218~Cellular senescence	33	33/1321	157/7806	0.10324	0.285689	1.24205			KEGG
357	hsa00640~Propanoate metabolism	9	9/1321	34/7806	0.107718	0.293506	1.56419			KEGG
358	hsa04072~Phospholipase D signaling pathway	31	31/1321	147/7806	0.107893	0.293506	1.24615			KEGG
359	hsa04929~GnRH secretion	15	15/1321	64/7806	0.112278	0.301993	1.38496			KEGG
360	hsa00140~Steroid hormone biosynthesis	14	14/1321	59/7806	0.112895	0.301993	1.40217			KEGG
361	hsa04658~Th1 and Th2 cell differentiation	20	20/1321	90/7806	0.115766	0.305082	1.31315			KEGG
362	hsa00592~alpha-Linolenic acid metabolism	7	7/1321	25/7806	0.11595	0.305082	1.65456			KEGG
363	hsa00260~Glycine, serine and threonine metabolism	10	10/1321	40/7806	0.126132	0.327279	1.47729			KEGG
364	hsa04923~Regulation of lipolysis in adipocytes	13	13/1321	55/7806	0.126425	0.327279	1.39671			KEGG
365	hsa04911~Insulin secretion	19	19/1321	86/7806	0.128312	0.329506	1.30551			KEGG
366	hsa04146~Peroxisome	18	18/1321	81/7806	0.130618	0.332764	1.31315			KEGG
367	hsa05206~MicroRNAs in cancer	52	52/1321	265/7806	0.134368	0.339624	1.15953			KEGG
368	hsa00561~Glycerolipid metabolism	14	14/1321	61/7806	0.138915	0.347575	1.3562			KEGG
369	hsa00410~beta-Alanine metabolism	8	8/1321	31/7806	0.140426	0.347575	1.52494			KEGG
370	hsa00350~Tyrosine metabolism	9	9/1321	36/7806	0.142299	0.347575	1.47729			KEGG
371	hsa05143~African trypanosomiasis	9	9/1321	36/7806	0.142299	0.347575	1.47729			KEGG
372	hsa03440~Homologous recombination	10	10/1321	41/7806	0.142928	0.347575	1.44126			KEGG
373	hsa05218~Melanoma	16	16/1321	72/7806	0.147828	0.356787	1.31315			KEGG
374	hsa04540~Gap junction	19	19/1321	88/7806	0.151219	0.360278	1.27584			KEGG
375	hsa05167~Kaposi sarcoma-associated herpesvirus infection	37	37/1321	185/7806	0.151519	0.360278	1.18183			KEGG
376	hsa03430~Mismatch repair	6	6/1321	22/7806	0.15479	0.365351	1.61159			KEGG
377	hsa00600~Sphingolipid metabolism	11	11/1321	47/7806	0.159467	0.373642	1.38299			KEGG
378	hsa04215~Apoptosis - multiple species	8	8/1321	32/7806	0.161087	0.374702	1.47729			KEGG
379	hsa05132~Salmonella infection	42	42/1321	214/7806	0.163943	0.378602	1.15974			KEGG
380	hsa05213~Endometrial cancer	13	13/1321	58/7806	0.171188	0.392511	1.32447			KEGG
381	hsa05214~Glioma	16	16/1321	74/7806	0.175345	0.399189	1.27766			KEGG
382	hsa04340~Hedgehog signaling pathway	11	11/1321	48/7806	0.177179	0.400525	1.35418			KEGG
383	hsa04068~FoxO signaling pathway	26	26/1321	128/7806	0.179507	0.402646	1.2003			KEGG
384	hsa04977~Vitamin digestion and absorption	6	6/1321	23/7806	0.18125	0.402646	1.54152			KEGG
385	hsa00650~Butanoate metabolism	7	7/1321	28/7806	0.183135	0.402646	1.47729			KEGG
386	hsa04392~Hippo signaling pathway - multiple species	7	7/1321	28/7806	0.183135	0.402646	1.47729			KEGG
387	hsa00480~Glutathione metabolism	12	12/1321	54/7806	0.19176	0.418741	1.31315			KEGG
388	hsa04726~Serotonergic synapse	23	23/1321	113/7806	0.194544	0.42195	1.20275			KEGG
389	hsa04114~Oocyte meiosis	25	25/1321	124/7806	0.195901	0.422042	1.19136			KEGG
390	hsa00620~Pyruvate metabolism	9	9/1321	39/7806	0.203182	0.43481	1.36365			KEGG
391	hsa00532~Glycosaminoglycan biosynthesis - chondroitin sulfate / dermatan sulfate	5	5/1321	19/7806	0.207714	0.436684	1.55504			KEGG
392	hsa00770~Pantothenate and CoA biosynthesis	5	5/1321	19/7806	0.207714	0.436684	1.55504			KEGG
393	hsa05418~Fluid shear stress and atherosclerosis	27	27/1321	136/7806	0.208139	0.436684	1.17314			KEGG
394	hsa05320~Autoimmune thyroid disease	11	11/1321	50/7806	0.215192	0.448549	1.30002			KEGG
395	hsa05223~Non-small cell lung cancer	14	14/1321	66/7806	0.21669	0.448758	1.25346			KEGG
396	hsa05340~Primary immunodeficiency	8	8/1321	35/7806	0.230512	0.474078	1.35067			KEGG
397	hsa00072~Synthesis and degradation of ketone bodies	3	3/1321	7806-10-01	0.23187	0.474078	1.77275			KEGG
398	hsa00604~Glycosphingolipid biosynthesis - ganglio series	4	4/1321	15/7806	0.240149	0.486697	1.57578			KEGG
399	hsa00670~One carbon pool by folate	5	5/1321	20/7806	0.241074	0.486697	1.47729			KEGG
400	hsa01200~Carbon metabolism	23	23/1321	117/7806	0.246552	0.494645	1.16163			KEGG
401	hsa00240~Pyrimidine metabolism	12	12/1321	57/7806	0.248525	0.495507	1.24403			KEGG
402	hsa04612~Antigen processing and presentation	14	14/1321	68/7806	0.252203	0.49667	1.21659			KEGG
403	hsa05211~Renal cell carcinoma	14	14/1321	68/7806	0.252203	0.49667	1.21659			KEGG
404	hsa05164~Influenza A	32	32/1321	168/7806	0.257388	0.503791	1.12555			KEGG
405	hsa00052~Galactose metabolism	7	7/1321	31/7806	0.262675	0.511022	1.33433			KEGG
406	hsa05230~Central carbon metabolism in cancer	14	14/1321	69/7806	0.270729	0.523517	1.19896			KEGG
407	hsa04931~Insulin resistance	21	21/1321	108/7806	0.276617	0.530558	1.149			KEGG
408	hsa04961~Endocrine and other factor-regulated calcium reabsorption	11	11/1321	53/7806	0.277675	0.530558	1.22643			KEGG
409	hsa01230~Biosynthesis of amino acids	15	15/1321	75/7806	0.280227	0.532265	1.18183			KEGG
410	hsa04730~Long-term depression	12	12/1321	59/7806	0.289391	0.546438	1.20186			KEGG
411	hsa04066~HIF-1 signaling pathway	21	21/1321	109/7806	0.291825	0.547813	1.13846			KEGG
412	hsa00564~Glycerophospholipid metabolism	19	19/1321	98/7806	0.29447	0.549564	1.14565			KEGG
413	hsa00053~Ascorbate and aldarate metabolism	6	6/1321	27/7806	0.300997	0.555288	1.31315			KEGG
414	hsa00601~Glycosphingolipid biosynthesis - lacto and neolacto series	6	6/1321	27/7806	0.300997	0.555288	1.31315			KEGG
415	hsa04520~Adherens junction	14	14/1321	71/7806	0.309059	0.566903	1.16519			KEGG
416	hsa00120~Primary bile acid biosynthesis	4	4/1321	17/7806	0.321788	0.579248	1.39039			KEGG
417	hsa00360~Phenylalanine metabolism	4	4/1321	17/7806	0.321788	0.579248	1.39039			KEGG
418	hsa00910~Nitrogen metabolism	4	4/1321	17/7806	0.321788	0.579248	1.39039			KEGG
419	hsa04630~JAK-STAT signaling pathway	30	30/1321	162/7806	0.323008	0.579248	1.09429			KEGG
420	hsa05130~Pathogenic Escherichia coli infection	36	36/1321	197/7806	0.33266	0.593243	1.07985			KEGG
421	hsa04926~Relaxin signaling pathway	24	24/1321	129/7806	0.338566	0.60044	1.09938			KEGG
422	hsa04012~ErbB signaling pathway	16	16/1321	84/7806	0.343579	0.605983	1.12555			KEGG
423	hsa04614~Renin-angiotensin system	5	5/1321	23/7806	0.34742	0.609408	1.2846			KEGG
424	hsa01522~Endocrine resistance	18	18/1321	96/7806	0.355987	0.616518	1.10797			KEGG
425	hsa03460~Fanconi anemia pathway	10	10/1321	51/7806	0.358722	0.616518	1.15866			KEGG
426	hsa04913~Ovarian steroidogenesis	10	10/1321	51/7806	0.358722	0.616518	1.15866			KEGG
427	hsa04620~Toll-like receptor signaling pathway	19	19/1321	102/7806	0.361489	0.616518	1.10073			KEGG
428	hsa04660~T cell receptor signaling pathway	19	19/1321	102/7806	0.361489	0.616518	1.10073			KEGG
429	hsa04216~Ferroptosis	8	8/1321	40/7806	0.362997	0.616518	1.18183			KEGG
430	hsa00562~Inositol phosphate metabolism	14	14/1321	74/7806	0.368922	0.623284	1.11795			KEGG
431	hsa04724~Glutamatergic synapse	21	21/1321	114/7806	0.371378	0.624148	1.08853			KEGG
432	hsa04930~Type II diabetes mellitus	9	9/1321	46/7806	0.373907	0.625126	1.15614			KEGG
433	hsa00500~Starch and sucrose metabolism	7	7/1321	35/7806	0.379567	0.631301	1.18183			KEGG
434	hsa00020~Citrate cycle (TCA cycle)	6	6/1321	30/7806	0.398304	0.654886	1.18183			KEGG
435	hsa04710~Circadian rhythm	6	6/1321	30/7806	0.398304	0.654886	1.18183			KEGG
436	hsa00520~Amino sugar and nucleotide sugar metabolism	9	9/1321	47/7806	0.399868	0.654886	1.13154			KEGG
437	hsa00760~Nicotinate and nicotinamide metabolism	7	7/1321	36/7806	0.409463	0.664276	1.149			KEGG
438	hsa05212~Pancreatic cancer	14	14/1321	76/7806	0.40974	0.664276	1.08853			KEGG
439	hsa00380~Tryptophan metabolism	8	8/1321	42/7806	0.418424	0.674946	1.12555			KEGG
440	hsa00280~Valine, leucine and isoleucine degradation	9	9/1321	48/7806	0.425864	0.683512	1.10797			KEGG
441	hsa01523~Antifolate resistance	6	6/1321	31/7806	0.430855	0.688082	1.14371			KEGG
442	hsa04210~Apoptosis	24	24/1321	136/7806	0.445862	0.705147	1.04279			KEGG
443	hsa00100~Steroid biosynthesis	4	4/1321	20/7806	0.445934	0.705147	1.18183			KEGG
444	hsa05135~Yersinia infection	21	21/1321	119/7806	0.4541	0.710279	1.04279			KEGG
445	hsa00790~Folate biosynthesis	5	5/1321	26/7806	0.455818	0.710279	1.13638			KEGG
446	hsa04950~Maturity onset diabetes of the young	5	5/1321	26/7806	0.455818	0.710279	1.13638			KEGG
447	hsa04925~Aldosterone synthesis and secretion	17	17/1321	96/7806	0.460563	0.714207	1.04641			KEGG
448	hsa04664~Fc epsilon RI signaling pathway	12	12/1321	67/7806	0.464718	0.717186	1.05836			KEGG
449	hsa05100~Bacterial invasion of epithelial cells	13	13/1321	73/7806	0.468115	0.718972	1.05232			KEGG
450	hsa00603~Glycosphingolipid biosynthesis - globo and isoglobo series	3	3/1321	15/7806	0.478736	0.729511	1.18183			KEGG
451	hsa05169~Epstein-Barr virus infection	34	34/1321	197/7806	0.479523	0.729511	1.01985			KEGG
452	hsa00590~Arachidonic acid metabolism	11	11/1321	62/7806	0.484035	0.732902	1.0484			KEGG
453	hsa04971~Gastric acid secretion	13	13/1321	74/7806	0.489255	0.733086	1.0381			KEGG
454	hsa00062~Fatty acid elongation	5	5/1321	27/7806	0.491004	0.733086	1.09429			KEGG
455	hsa00051~Fructose and mannose metabolism	6	6/1321	33/7806	0.494855	0.733086	1.07439			KEGG
456	hsa04150~mTOR signaling pathway	26	26/1321	151/7806	0.49536	0.733086	1.01747			KEGG
457	hsa04912~GnRH signaling pathway	16	16/1321	92/7806	0.495575	0.733086	1.02768			KEGG
458	hsa04920~Adipocytokine signaling pathway	12	12/1321	69/7806	0.508632	0.748949	1.02768			KEGG
459	hsa00430~Taurine and hypotaurine metabolism	2	2/1321	7806-10-01	0.524496	0.768781	1.18183			KEGG
460	hsa05120~Epithelial cell signaling in Helicobacter pylori infection	12	12/1321	70/7806	0.530238	0.773665	1.013			KEGG
461	hsa04137~Mitophagy - animal	11	11/1321	65/7806	0.551769	0.801438	1.00001			KEGG
462	hsa00591~Linoleic acid metabolism	5	5/1321	29/7806	0.558586	0.807685	1.01882			KEGG
463	hsa00450~Selenocompound metabolism	3	3/1321	17/7806	0.567915	0.809834	1.04279			KEGG
464	hsa05162~Measles	23	23/1321	138/7806	0.568169	0.809834	0.98486			KEGG
465	hsa05322~Systemic lupus erythematosus	21	21/1321	126/7806	0.568324	0.809834	0.98486			KEGG
466	hsa05131~Shigellosis	39	39/1321	234/7806	0.570164	0.809834	0.98486			KEGG
467	hsa04720~Long-term potentiation	11	11/1321	66/7806	0.573616	0.811149	0.98486			KEGG
468	hsa00860~Porphyrin and chlorophyll metabolism	7	7/1321	42/7806	0.581858	0.819194	0.98486			KEGG
469	hsa00630~Glyoxylate and dicarboxylate metabolism	5	5/1321	30/7806	0.590642	0.827931	0.98486			KEGG
470	hsa04213~Longevity regulating pathway - multiple species	10	10/1321	61/7806	0.597403	0.830268	0.968715			KEGG
471	hsa00270~Cysteine and methionine metabolism	8	8/1321	49/7806	0.603838	0.830268	0.964761			KEGG
472	hsa05030~Cocaine addiction	8	8/1321	49/7806	0.603838	0.830268	0.964761			KEGG
473	hsa00061~Fatty acid biosynthesis	3	3/1321	18/7806	0.608811	0.830268	0.98486			KEGG
474	hsa00511~Other glycan degradation	3	3/1321	18/7806	0.608811	0.830268	0.98486			KEGG
475	hsa01210~2-Oxocarboxylic acid metabolism	3	3/1321	18/7806	0.608811	0.830268	0.98486			KEGG
476	hsa05031~Amphetamine addiction	11	11/1321	68/7806	0.615894	0.830268	0.955893			KEGG
477	hsa04650~Natural killer cell mediated cytotoxicity	20	20/1321	123/7806	0.615993	0.830268	0.960839			KEGG
478	hsa04071~Sphingolipid signaling pathway	19	19/1321	117/7806	0.617344	0.830268	0.959607			KEGG
479	hsa05170~Human immunodeficiency virus 1 infection	34	34/1321	208/7806	0.618174	0.830268	0.96592			KEGG
480	hsa04915~Estrogen signaling pathway	22	22/1321	136/7806	0.628353	0.840422	0.955893			KEGG
481	hsa04722~Neurotrophin signaling pathway	19	19/1321	118/7806	0.633015	0.84063	0.951475			KEGG
482	hsa02010~ABC transporters	7	7/1321	44/7806	0.633746	0.84063	0.940094			KEGG
483	hsa05033~Nicotine addiction	6	6/1321	38/7806	0.641109	0.846897	0.933025			KEGG
484	hsa04728~Dopaminergic synapse	21	21/1321	131/7806	0.644481	0.847862	0.94727			KEGG
485	hsa03410~Base excision repair	5	5/1321	32/7806	0.650679	0.852523	0.923306			KEGG
486	hsa04927~Cortisol synthesis and secretion	10	10/1321	64/7806	0.660923	0.862424	0.923306			KEGG
487	hsa00514~Other types of O-glycan biosynthesis	7	7/1321	46/7806	0.681762	0.882441	0.89922			KEGG
488	hsa04973~Carbohydrate digestion and absorption	7	7/1321	46/7806	0.681762	0.882441	0.89922			KEGG
489	hsa04370~VEGF signaling pathway	9	9/1321	59/7806	0.687302	0.88604	0.901397			KEGG
490	hsa05017~Spinocerebellar ataxia	15	15/1321	97/7806	0.691382	0.887735	0.913788			KEGG
491	hsa04723~Retrograde endocannabinoid signaling	23	23/1321	147/7806	0.695084	0.888932	0.924562			KEGG
492	hsa04260~Cardiac muscle contraction	13	13/1321	85/7806	0.700304	0.892054	0.903754			KEGG
493	hsa04070~Phosphatidylinositol signaling system	15	15/1321	98/7806	0.706968	0.896889	0.904463			KEGG
494	hsa00533~Glycosaminoglycan biosynthesis - keratan sulfate	2	2/1321	14/7806	0.71291	0.896889	0.844166			KEGG
495	hsa04910~Insulin signaling pathway	21	21/1321	136/7806	0.713455	0.896889	0.912444			KEGG
496	hsa00220~Arginine biosynthesis	3	3/1321	21/7806	0.715276	0.896889	0.844166			KEGG
497	hsa04152~AMPK signaling pathway	18	18/1321	119/7806	0.737059	0.917038	0.893822			KEGG
498	hsa04935~Growth hormone synthesis, secretion and action	18	18/1321	119/7806	0.737059	0.917038	0.893822			KEGG
499	hsa00900~Terpenoid backbone biosynthesis	3	3/1321	22/7806	0.745351	0.923775	0.805795			KEGG
500	hsa04080~Neuroactive ligand-receptor interaction	52	52/1321	333/7806	0.763529	0.942665	0.922752			KEGG
501	hsa04917~Prolactin signaling pathway	10	10/1321	70/7806	0.769012	0.945797	0.844166			KEGG
502	hsa00340~Histidine metabolism	3	3/1321	23/7806	0.772832	0.946055	0.77076			KEGG
503	hsa04621~NOD-like receptor signaling pathway	27	27/1321	179/7806	0.775117	0.946055	0.891326			KEGG
504	hsa03420~Nucleotide excision repair	6	6/1321	45/7806	0.796951	0.96902	0.787888			KEGG
505	hsa00513~Various types of N-glycan biosynthesis	5	5/1321	39/7806	0.813465	0.985367	0.757585			KEGG
506	hsa04918~Thyroid hormone synthesis	10	10/1321	74/7806	0.82608	0.993789	0.798535			KEGG
507	hsa04742~Taste transduction	11	11/1321	81/7806	0.829869	0.993789	0.802478			KEGG
508	hsa00310~Lysine degradation	8	8/1321	61/7806	0.833179	0.993789	0.774972			KEGG
509	hsa04130~SNARE interactions in vesicular transport	4	4/1321	33/7806	0.833746	0.993789	0.716262			KEGG
510	hsa05220~Chronic myeloid leukemia	10	10/1321	75/7806	0.838519	0.993789	0.787888			KEGG
511	hsa05160~Hepatitis C	22	22/1321	154/7806	0.838994	0.993789	0.844166			KEGG
512	hsa00531~Glycosaminoglycan degradation	2	2/1321	19/7806	0.856543	1	0.622017			KEGG
513	hsa04966~Collecting duct acid secretion	3	3/1321	27/7806	0.859346	1	0.656573			KEGG
514	hsa05110~Vibrio cholerae infection	6	6/1321	50/7806	0.871995	1	0.709099			KEGG
515	hsa03020~RNA polymerase	3	3/1321	28/7806	0.875854	1	0.633124			KEGG
516	hsa03018~RNA degradation	10	10/1321	79/7806	0.88147	1	0.747995			KEGG
517	hsa04330~Notch signaling pathway	6	6/1321	52/7806	0.894733	1	0.681826			KEGG
518	hsa05161~Hepatitis B	22	22/1321	162/7806	0.897535	1	0.802478			KEGG
519	hsa00030~Pentose phosphate pathway	3	3/1321	30/7806	0.903793	1	0.590916			KEGG
520	hsa05235~PD-L1 expression and PD-1 checkpoint pathway in cancer	11	11/1321	89/7806	0.907119	1	0.730346			KEGG
521	hsa00010~Glycolysis / Gluconeogenesis	8	8/1321	68/7806	0.908842	1	0.695195			KEGG
522	hsa03450~Non-homologous end-joining	1	1/1321	13/7806	0.910386	1	0.454551			KEGG
523	hsa00515~Mannose type O-glycan biosynthesis	2	2/1321	23/7806	0.920355	1	0.51384			KEGG
524	hsa04922~Glucagon signaling pathway	13	13/1321	105/7806	0.921041	1	0.73161			KEGG
525	hsa05203~Viral carcinogenesis	27	27/1321	200/7806	0.923047	1	0.797737			KEGG
526	hsa04136~Autophagy - other	3	3/1321	32/7806	0.925919	1	0.553984			KEGG
527	hsa05034~Alcoholism	24	24/1321	181/7806	0.9273	1	0.783535			KEGG
528	hsa04217~Necroptosis	21	21/1321	161/7806	0.927949	1	0.77076			KEGG
529	hsa04721~Synaptic vesicle cycle	9	9/1321	78/7806	0.929193	1	0.681826			KEGG
530	hsa04932~Non-alcoholic fatty liver disease (NAFLD)	19	19/1321	148/7806	0.930505	1	0.758608			KEGG
531	hsa00534~Glycosaminoglycan biosynthesis - heparan sulfate / heparin	2	2/1321	24/7806	0.931494	1	0.49243			KEGG
532	hsa00730~Thiamine metabolism	1	1/1321	15/7806	0.938194	1	0.393944			KEGG
533	hsa00563~Glycosylphosphatidylinositol (GPI)-anchor biosynthesis	2	2/1321	25/7806	0.941147	1	0.472733			KEGG
534	hsa04979~Cholesterol metabolism	5	5/1321	50/7806	0.941766	1	0.590916			KEGG
535	hsa04211~Longevity regulating pathway	10	10/1321	88/7806	0.944703	1	0.671495			KEGG
536	hsa04625~C-type lectin receptor signaling pathway	12	12/1321	103/7806	0.947445	1	0.688446			KEGG
537	hsa04962~Vasopressin-regulated water reabsorption	4	4/1321	44/7806	0.954255	1	0.537196			KEGG
538	hsa04623~Cytosolic DNA-sensing pathway	6	6/1321	61/7806	0.959159	1	0.581229			KEGG
539	hsa04142~Lysosome	14	14/1321	123/7806	0.96726	1	0.672587			KEGG
540	hsa05014~Amyotrophic lateral sclerosis (ALS)	5	5/1321	57/7806	0.9745	1	0.518347			KEGG
541	hsa00510~N-Glycan biosynthesis	4	4/1321	50/7806	0.97885	1	0.472733			KEGG
542	hsa00970~Aminoacyl-tRNA biosynthesis	3	3/1321	44/7806	0.986089	1	0.402897			KEGG
543	hsa04140~Autophagy - animal	14	14/1321	137/7806	0.990617	1	0.603856			KEGG
544	hsa04744~Phototransduction	1	1/1321	27/7806	0.993362	1	0.218858			KEGG
545	hsa05012~Parkinson disease	14	14/1321	141/7806	0.993595	1	0.586725			KEGG
546	hsa05010~Alzheimer disease	17	17/1321	169/7806	0.996068	1	0.594413			KEGG
547	hsa04144~Endocytosis	26	26/1321	247/7806	0.998482	1	0.622017			KEGG
548	hsa04622~RIG-I-like receptor signaling pathway	4	4/1321	70/7806	0.998712	1	0.337666			KEGG
549	hsa04141~Protein processing in endoplasmic reticulum	14	14/1321	166/7806	0.999523	1	0.498363			KEGG
550	hsa04714~Thermogenesis	22	22/1321	230/7806	0.999546	1	0.565224			KEGG
551	hsa03022~Basal transcription factors	1	1/1321	44/7806	0.99972	1	0.134299			KEGG
552	hsa03015~mRNA surveillance pathway	5	5/1321	91/7806	0.999742	1	0.324679			KEGG
553	hsa03050~Proteasome	1	1/1321	45/7806	0.999768	1	0.131315			KEGG
554	hsa03013~RNA transport	14	14/1321	175/7806	0.999827	1	0.472733			KEGG
555	hsa00190~Oxidative phosphorylation	9	9/1321	132/7806	0.999834	1	0.402897			KEGG
556	hsa04120~Ubiquitin mediated proteolysis	8	8/1321	135/7806	0.999968	1	0.350172			KEGG
557	hsa05168~Herpes simplex virus 1 infection	52	52/1321	484/7806	0.999969	1	0.634868			KEGG
558	hsa05016~Huntington disease	18	18/1321	261/7806	1	1	0.407528			KEGG
559	hsa03040~Spliceosome	6	6/1321	148/7806	1	1	0.239561			KEGG
560	hsa03010~Ribosome	4	4/1321	148/7806	1	1	0.159707			KEGG
561	hsa04740~Olfactory transduction	12	12/1321	413/7806	1	1	0.171695			KEGG
562	DOID:120~female reproductive organ cancer	146	146/1591	446/7517	2.97966e-09	1.49191e-06	1.54665			DO
563	DOID:3905~lung carcinoma	159	159/1591	497/7517	3.57771e-09	1.49191e-06	1.51152			DO
564	DOID:3908~non-small cell lung carcinoma	134	134/1591	420/7517	8.05636e-08	2.23967e-05	1.5074			DO
565	DOID:8398~osteoarthritis	68	68/1591	183/7517	3.86259e-07	4.48786e-05	1.75563			DO
566	DOID:2394~ovarian cancer	102	102/1591	308/7517	4.36352e-07	4.48786e-05	1.56467			DO
567	DOID:2151~malignant ovarian surface epithelial-stromal neoplasm	95	95/1591	282/7517	4.57828e-07	4.48786e-05	1.59165			DO
568	DOID:2152~ovary epithelial cancer	95	95/1591	282/7517	4.57828e-07	4.48786e-05	1.59165			DO
569	DOID:4001~ovarian carcinoma	95	95/1591	282/7517	4.57828e-07	4.48786e-05	1.59165			DO
570	DOID:170~endocrine gland cancer	149	149/1591	491/7517	4.84302e-07	4.48786e-05	1.43377			DO
571	DOID:10534~stomach cancer	89	89/1591	264/7517	1.02578e-06	8.55499e-05	1.5928			DO
572	DOID:5295~intestinal disease	58	58/1591	154/7517	1.66876e-06	0.000121069	1.77943			DO
573	DOID:18~urinary system disease	140	140/1591	465/7517	1.79457e-06	0.000121069	1.42249			DO
574	DOID:3083~chronic obstructive pulmonary disease	74	74/1591	212/7517	1.972e-06	0.000121069	1.64919			DO
575	DOID:3388~periodontal disease	52	52/1591	134/7517	2.03234e-06	0.000121069	1.83347			DO
576	DOID:1091~tooth disease	58	58/1591	157/7517	3.41785e-06	0.000190033	1.74543			DO
577	DOID:5517~stomach carcinoma	55	55/1591	148/7517	4.95461e-06	0.000245829	1.7558			DO
578	DOID:557~kidney disease	134	134/1591	449/7517	5.04074e-06	0.000245829	1.41004			DO
579	DOID:5672~large intestine cancer	91	91/1591	281/7517	5.30567e-06	0.000245829	1.53006			DO
580	DOID:219~colon cancer	89	89/1591	275/7517	6.9312e-06	0.000304243	1.52909			DO
581	DOID:0060084~cell type benign neoplasm	137	137/1591	464/7517	7.31703e-06	0.00030512	1.39501			DO
582	DOID:9256~colorectal cancer	90	90/1591	280/7517	8.38967e-06	0.00033319	1.51865			DO
583	DOID:3620~central nervous system cancer	47	47/1591	123/7517	1.01728e-05	0.000383473	1.80537			DO
584	DOID:10155~intestinal cancer	93	93/1591	293/7517	1.05754e-05	0.000383473	1.49965			DO
585	DOID:2320~obstructive lung disease	93	93/1591	294/7517	1.23352e-05	0.00042865	1.49455			DO
586	DOID:3459~breast carcinoma	114	114/1591	378/7517	1.56392e-05	0.000521722	1.42491			DO
587	DOID:1520~colon carcinoma	58	58/1591	165/7517	1.97478e-05	0.000633449	1.6608			DO
588	DOID:10952~nephritis	52	52/1591	144/7517	2.26666e-05	0.000700145	1.70614			DO
589	DOID:824~periodontitis	44	44/1591	116/7517	2.39854e-05	0.000714422	1.79213			DO
590	DOID:850~lung disease	138	138/1591	479/7517	2.67155e-05	0.000768302	1.36119			DO
591	DOID:0050161~lower respiratory tract disease	140	140/1591	490/7517	3.66368e-05	0.0010185	1.34991			DO
592	DOID:4451~renal carcinoma	110	110/1591	369/7517	3.83859e-05	0.0010327	1.40845			DO
593	DOID:3717~gastric adenocarcinoma	36	36/1591	91/7517	4.61135e-05	0.00120183	1.86911			DO
594	DOID:0050624~gastrointestinal system benign neoplasm	23	23/1591	49/7517	4.86812e-05	0.00123031	2.21772			DO
595	DOID:1115~sarcoma	63	63/1591	190/7517	6.80627e-05	0.00166954	1.56661			DO
596	DOID:0060100~musculoskeletal system cancer	124	124/1591	431/7517	7.40819e-05	0.00172428	1.35931			DO
597	DOID:403~mouth disease	61	61/1591	183/7517	7.44292e-05	0.00172428	1.5749			DO
598	DOID:1781~thyroid cancer	67	67/1591	206/7517	7.91616e-05	0.00178434	1.53667			DO
599	DOID:3996~urinary system cancer	137	137/1591	486/7517	8.93437e-05	0.00196086	1.33186			DO
600	DOID:4450~renal cell carcinoma	99	99/1591	332/7517	9.24506e-05	0.00197702	1.40887			DO
601	DOID:289~endometriosis	34	34/1591	87/7517	9.9144e-05	0.00206715	1.84644			DO
602	DOID:1793~pancreatic cancer	93	93/1591	311/7517	0.000134254	0.00267542	1.41285			DO
603	DOID:3963~thyroid carcinoma	63	63/1591	194/7517	0.000134733	0.00267542	1.53431			DO
604	DOID:1040~chronic lymphocytic leukemia	65	65/1591	202/7517	0.000143287	0.00274897	1.52032			DO
605	DOID:16~integumentary system disease	110	110/1591	380/7517	0.000145029	0.00274897	1.36768			DO
606	DOID:0060085~organ system benign neoplasm	78	78/1591	256/7517	0.000241241	0.004471	1.43956			DO
607	DOID:6204~follicular adenoma	9	9/1591	13/7517	0.000258995	0.0046957	3.27095			DO
608	DOID:9538~multiple myeloma	76	76/1591	249/7517	0.000271954	0.00482574	1.44208			DO
609	DOID:201~connective tissue cancer	104	104/1591	363/7517	0.000334037	0.00567264	1.35363			DO
610	DOID:74~hematopoietic system disease	128	128/1591	462/7517	0.000340192	0.00567264	1.30901			DO
611	DOID:263~kidney cancer	119	119/1591	425/7517	0.000349863	0.00567264	1.32292			DO
612	DOID:13359~Ehlers-Danlos syndrome	8	8/1591	7517-11-01	0.000352322	0.00567264	3.43615			DO
613	DOID:657~adenoma	96	96/1591	331/7517	0.00035369	0.00567264	1.37031			DO
614	DOID:0060180~colitis	27	27/1591	68/7517	0.000372247	0.00574915	1.87598			DO
615	DOID:8577~ulcerative colitis	27	27/1591	68/7517	0.000372247	0.00574915	1.87598			DO
616	DOID:4607~biliary tract cancer	56	56/1591	174/7517	0.000402236	0.00609936	1.52059			DO
617	DOID:1967~leiomyosarcoma	15	15/1591	30/7517	0.000430738	0.00616785	2.36235			DO
618	DOID:4230~smooth muscle cancer	15	15/1591	30/7517	0.000430738	0.00616785	2.36235			DO
619	DOID:2349~arteriosclerosis	99	99/1591	345/7517	0.000434695	0.00616785	1.35578			DO
620	DOID:37~skin disease	97	97/1591	337/7517	0.000441447	0.00616785	1.35993			DO
621	DOID:526~Human immunodeficiency virus infectious disease	54	54/1591	167/7517	0.000445744	0.00616785	1.52775			DO
622	DOID:4960~bone marrow cancer	91	91/1591	313/7517	0.000458167	0.00616785	1.37364			DO
623	DOID:299~adenocarcinoma	50	50/1591	152/7517	0.000458522	0.00616785	1.55418			DO
624	DOID:3770~pulmonary fibrosis	41	41/1591	119/7517	0.000506909	0.0067105	1.62784			DO
625	DOID:363~uterine cancer	34	34/1591	94/7517	0.00055153	0.00702901	1.70893			DO
626	DOID:1036~chronic leukemia	64	64/1591	207/7517	0.000552442	0.00702901	1.46078			DO
627	DOID:1936~atherosclerosis	96	96/1591	335/7517	0.000556252	0.00702901	1.35394			DO
628	DOID:2891~thyroid adenoma	9	9/1591	14/7517	0.000588968	0.00733133	3.03731			DO
629	DOID:2348~arteriosclerotic cardiovascular disease	96	96/1591	336/7517	0.000621065	0.00761718	1.34991			DO
630	DOID:0070004~myeloma	89	89/1591	308/7517	0.000655133	0.00783401	1.36525			DO
631	DOID:5041~esophageal cancer	46	46/1591	139/7517	0.000657531	0.00783401	1.56357			DO
632	DOID:0050589~inflammatory bowel disease	32	32/1591	88/7517	0.000713363	0.00837951	1.71807			DO
633	DOID:3213~demyelinating disease	54	54/1591	171/7517	0.000841166	0.00974351	1.49201			DO
634	DOID:854~collagen disease	59	59/1591	191/7517	0.000916585	0.0104717	1.45946			DO
635	DOID:635~acquired immunodeficiency syndrome	26	26/1591	68/7517	0.00093344	0.0105201	1.8065			DO
636	DOID:1380~endometrial cancer	33	33/1591	93/7517	0.000971939	0.010808	1.67651			DO
637	DOID:229~female reproductive system disease	57	57/1591	184/7517	0.00102968	0.0111578	1.46363			DO
638	DOID:205~hyperostosis	13	13/1591	26/7517	0.00104037	0.0111578	2.36235			DO
639	DOID:3193~peripheral nerve sheath neoplasm	14	14/1591	29/7517	0.00104353	0.0111578	2.28089			DO
640	DOID:2377~multiple sclerosis	52	52/1591	165/7517	0.00109511	0.0115611	1.489			DO
641	DOID:4896~bile duct adenocarcinoma	41	41/1591	124/7517	0.00128553	0.0132362	1.5622			DO
642	DOID:4947~cholangiocarcinoma	41	41/1591	124/7517	0.00128553	0.0132362	1.5622			DO
643	DOID:200~giant cell tumor	10	10/1591	18/7517	0.00142872	0.0142399	2.62483			DO
644	DOID:4606~bile duct cancer	44	44/1591	136/7517	0.00143424	0.0142399	1.52858			DO
645	DOID:4897~bile duct carcinoma	44	44/1591	136/7517	0.00143424	0.0142399	1.52858			DO
646	DOID:4045~muscle cancer	36	36/1591	106/7517	0.00145594	0.0142853	1.60462			DO
647	DOID:5940~malignant peripheral nerve sheath tumor	11	11/1591	21/7517	0.00156436	0.0151706	2.47484			DO
648	DOID:3969~papillary thyroid carcinoma	35	35/1591	103/7517	0.00166562	0.0157989	1.60548			DO
649	DOID:9500~leukocyte disease	32	32/1591	92/7517	0.00168233	0.0157989	1.64337			DO
650	DOID:1192~peripheral nervous system neoplasm	105	105/1591	383/7517	0.00168597	0.0157989	1.29528			DO
651	DOID:5409~lung small cell carcinoma	26	26/1591	71/7517	0.0019414	0.0178638	1.73017			DO
652	DOID:3082~interstitial lung disease	51	51/1591	165/7517	0.00194916	0.0178638	1.46036			DO
653	DOID:0060060~non-Hodgkin lymphoma	16	16/1591	37/7517	0.00202163	0.0183265	2.04311			DO
654	DOID:350~mastocytosis	18	18/1591	44/7517	0.00231288	0.0207413	1.93283			DO
655	DOID:3302~chordoma	10	10/1591	19/7517	0.00244841	0.0214944	2.48668			DO
656	DOID:3303~notochordal cancer	10	10/1591	19/7517	0.00244841	0.0214944	2.48668			DO
657	DOID:0060071~pre-malignant neoplasm	11	11/1591	22/7517	0.00253593	0.0217738	2.36235			DO
658	DOID:1037~lymphoblastic leukemia	112	112/1591	417/7517	0.00255663	0.0217738	1.26898			DO
659	DOID:1790~malignant mesothelioma	17	17/1591	41/7517	0.00255856	0.0217738	1.95902			DO
660	DOID:3910~lung adenocarcinoma	52	52/1591	171/7517	0.00261037	0.0219904	1.43675			DO
661	DOID:6432~pulmonary hypertension	27	27/1591	77/7517	0.00328918	0.0273939	1.65671			DO
662	DOID:4905~pancreatic carcinoma	67	67/1591	233/7517	0.00331749	0.0273939	1.35861			DO
663	DOID:1319~brain cancer	17	17/1591	42/7517	0.0034649	0.0280873	1.91238			DO
664	DOID:5408~Paget's disease of bone	8	8/1591	14/7517	0.00346881	0.0280873	2.69983			DO
665	DOID:5100~middle ear disease	13	13/1591	29/7517	0.00358792	0.0287723	2.11797			DO
666	DOID:0060089~endocrine organ benign neoplasm	32	32/1591	96/7517	0.00362747	0.0288125	1.5749			DO
667	DOID:0050743~mature T-cell and NK-cell lymphoma	9	9/1591	17/7517	0.00384548	0.0296956	2.50131			DO
668	DOID:0050749~peripheral T-cell lymphoma	9	9/1591	17/7517	0.00384548	0.0296956	2.50131			DO
669	DOID:0060061~cutaneous T cell lymphoma	9	9/1591	17/7517	0.00384548	0.0296956	2.50131			DO
670	DOID:452~pleomorphic adenoma	10	10/1591	20/7517	0.00397729	0.0304318	2.36235			DO
671	DOID:10283~prostate cancer	108	108/1591	406/7517	0.00420693	0.0318962	1.25682			DO
672	DOID:10747~lymphoid leukemia	25	25/1591	71/7517	0.00430589	0.0320635	1.66363			DO
673	DOID:3744~cervical squamous cell carcinoma	25	25/1591	71/7517	0.00430589	0.0320635	1.66363			DO
674	DOID:552~pneumonia	34	34/1591	105/7517	0.00466487	0.0344292	1.5299			DO
675	DOID:654~overnutrition	86	86/1591	315/7517	0.00482668	0.0347404	1.28992			DO
676	DOID:1074~kidney failure	46	46/1591	152/7517	0.00493861	0.0347404	1.42984			DO
677	DOID:2237~hepatitis	108	108/1591	408/7517	0.00495421	0.0347404	1.25066			DO
678	DOID:4074~pancreas adenocarcinoma	48	48/1591	160/7517	0.00499169	0.0347404	1.41741			DO
679	DOID:1575~rheumatic disease	53	53/1591	180/7517	0.00502428	0.0347404	1.39116			DO
680	DOID:418~systemic scleroderma	53	53/1591	180/7517	0.00502428	0.0347404	1.39116			DO
681	DOID:419~scleroderma	53	53/1591	180/7517	0.00502428	0.0347404	1.39116			DO
682	DOID:2797~idiopathic interstitial pneumonia	13	13/1591	30/7517	0.00512359	0.0347404	2.04737			DO
683	DOID:4610~intestinal benign neoplasm	13	13/1591	30/7517	0.00512359	0.0347404	2.04737			DO
684	DOID:5353~colonic disease	13	13/1591	30/7517	0.00512359	0.0347404	2.04737			DO
685	DOID:3500~gallbladder adenocarcinoma	7	7/1591	7517-12-01	0.00542131	0.0362711	2.75608			DO
686	DOID:0060116~sensory system cancer	42	42/1591	137/7517	0.00547981	0.0362711	1.44845			DO
687	DOID:2174~ocular cancer	42	42/1591	137/7517	0.00547981	0.0362711	1.44845			DO
688	DOID:1588~thrombocytopenia	23	23/1591	65/7517	0.00564132	0.0370462	1.67182			DO
689	DOID:4766~embryoma	90	90/1591	334/7517	0.00590427	0.03847	1.27312			DO
690	DOID:5166~endometrial stromal tumor	8	8/1591	15/7517	0.00606566	0.0392152	2.51984			DO
691	DOID:3479~uveal cancer	9	9/1591	18/7517	0.00626223	0.0395238	2.36235			DO
692	DOID:6039~uveal melanoma	9	9/1591	18/7517	0.00626223	0.0395238	2.36235			DO
693	DOID:11054~urinary bladder cancer	33	33/1591	103/7517	0.00630296	0.0395238	1.51374			DO
694	DOID:4362~cervical cancer	33	33/1591	103/7517	0.00630296	0.0395238	1.51374			DO
695	DOID:4029~gastritis	22	22/1591	62/7517	0.00645923	0.0402015	1.67651			DO
696	DOID:3856~male reproductive organ cancer	109	109/1591	416/7517	0.00666012	0.0407291	1.23796			DO
697	DOID:9970~obesity	83	83/1591	306/7517	0.00667801	0.0407291	1.28154			DO
698	DOID:2645~benign mesothelioma	20	20/1591	55/7517	0.00676293	0.0407291	1.71807			DO
699	DOID:5082~liver cirrhosis	61	61/1591	215/7517	0.00678148	0.0407291	1.3405			DO
700	DOID:2218~blood platelet disease	30	30/1591	92/7517	0.00678818	0.0407291	1.54066			DO
701	DOID:2213~hemorrhagic disease	44	44/1591	147/7517	0.00730244	0.0435017	1.4142			DO
702	DOID:3121~gallbladder cancer	19	19/1591	52/7517	0.00772704	0.0451061	1.72633			DO
703	DOID:3111~cystadenocarcinoma	15	15/1591	38/7517	0.00773402	0.0451061	1.86501			DO
704	DOID:3114~serous cystadenocarcinoma	15	15/1591	38/7517	0.00773402	0.0451061	1.86501			DO
705	DOID:234~colon adenocarcinoma	12	12/1591	28/7517	0.00785698	0.045505	2.02487			DO
706	DOID:2921~glomerulonephritis	26	26/1591	78/7517	0.0082521	0.0474638	1.5749			DO
707	DOID:14256~adult-onset Still's disease	6	6/1591	7517-10-01	0.00848761	0.0481542	2.83482			DO
708	DOID:3179~inverted papilloma	6	6/1591	7517-10-01	0.00848761	0.0481542	2.83482			DO
709	DOID:374~nutrition disease	88	88/1591	330/7517	0.00864007	0.0486879	1.25992			DO
710	DOID:11934~head and neck cancer	64	64/1591	230/7517	0.00896253	0.050158	1.3147			DO
711	DOID:1107~esophageal carcinoma	36	36/1591	117/7517	0.00907353	0.050158	1.45375			DO
712	DOID:1542~head and neck carcinoma	63	63/1591	226/7517	0.00908136	0.050158	1.31706			DO
713	DOID:9352~type 2 diabetes mellitus	58	58/1591	206/7517	0.00965093	0.0523042	1.33026			DO
714	DOID:11372~megacolon	9	9/1591	19/7517	0.00969466	0.0523042	2.23802			DO
715	DOID:799~varicose veins	9	9/1591	19/7517	0.00969466	0.0523042	2.23802			DO
716	DOID:2871~endometrial carcinoma	26	26/1591	79/7517	0.00988462	0.0523042	1.55497			DO
717	DOID:11729~Lyme disease	8	8/1591	16/7517	0.00990733	0.0523042	2.36235			DO
718	DOID:9675~pulmonary emphysema	8	8/1591	16/7517	0.00990733	0.0523042	2.36235			DO
719	DOID:2893~cervix carcinoma	32	32/1591	102/7517	0.00990895	0.0523042	1.48226			DO
720	DOID:2621~autonomic nervous system neoplasm	95	95/1591	362/7517	0.0103951	0.0541847	1.23991			DO
721	DOID:769~neuroblastoma	95	95/1591	362/7517	0.0103951	0.0541847	1.23991			DO
722	DOID:8850~salivary gland cancer	20	20/1591	57/7517	0.0105181	0.0542267	1.65779			DO
723	DOID:5520~head and neck squamous cell carcinoma	48	48/1591	166/7517	0.0105333	0.0542267	1.36618			DO
724	DOID:0080005~bone remodeling disease	41	41/1591	138/7517	0.0107239	0.0547153	1.40372			DO
725	DOID:104~bacterial infectious disease	71	71/1591	261/7517	0.0107594	0.0547153	1.28526			DO
726	DOID:6050~esophageal disease	18	18/1591	50/7517	0.0111275	0.0562447	1.70089			DO
727	DOID:3565~meningioma	25	25/1591	76/7517	0.0113546	0.0567048	1.55418			DO
728	DOID:9074~systemic lupus erythematosus	25	25/1591	76/7517	0.0113546	0.0567048	1.55418			DO
729	DOID:870~neuropathy	52	52/1591	183/7517	0.0114419	0.0568007	1.34254			DO
730	DOID:8857~lupus erythematosus	26	26/1591	80/7517	0.0117704	0.058086	1.53553			DO
731	DOID:2600~laryngeal carcinoma	11	11/1591	26/7517	0.0120514	0.0587772	1.99891			DO
732	DOID:8552~chronic myeloid leukemia	11	11/1591	26/7517	0.0120514	0.0587772	1.99891			DO
733	DOID:9741~biliary tract disease	27	27/1591	84/7517	0.0121388	0.0588593	1.51865			DO
734	DOID:3627~aortic aneurysm	20	20/1591	58/7517	0.0129388	0.0623753	1.62921			DO
735	DOID:1483~gingival disease	13	13/1591	33/7517	0.013029	0.0624493	1.86125			DO
736	DOID:4866~salivary gland adenoid cystic carcinoma	15	15/1591	40/7517	0.0131469	0.0626542	1.77176			DO
737	DOID:11723~Duchenne muscular dystrophy	10	10/1591	23/7517	0.0132449	0.0627626	2.05422			DO
738	DOID:12603~acute leukemia	32	32/1591	104/7517	0.0133703	0.062999	1.45375			DO
739	DOID:2994~germ cell cancer	100	100/1591	387/7517	0.0136373	0.0631673	1.22085			DO
740	DOID:715~T-cell leukemia	21	21/1591	62/7517	0.0137104	0.0631673	1.6003			DO
741	DOID:0050737~autosomal recessive disease	85	85/1591	323/7517	0.0138044	0.0631673	1.24334			DO
742	DOID:1485~cystic fibrosis	40	40/1591	136/7517	0.0138337	0.0631673	1.38962			DO
743	DOID:10591~pre-eclampsia	72	72/1591	268/7517	0.0138417	0.0631673	1.26932			DO
744	DOID:4948~gallbladder carcinoma	18	18/1591	51/7517	0.0138779	0.0631673	1.66754			DO
745	DOID:0060058~lymphoma	26	26/1591	81/7517	0.0139362	0.0631673	1.51657			DO
746	DOID:114~heart disease	126	126/1591	500/7517	0.0140742	0.0634482	1.19062			DO
747	DOID:14067~Plasmodium falciparum malaria	9	9/1591	20/7517	0.0143725	0.0640999	2.12612			DO
748	DOID:4254~osteosclerosis	9	9/1591	20/7517	0.0143725	0.0640999	2.12612			DO
749	DOID:319~spinal cord disease	12	12/1591	30/7517	0.0147017	0.0652192	1.88988			DO
750	DOID:127~leiomyoma	29	29/1591	93/7517	0.0148764	0.065645	1.47329			DO
751	DOID:688~embryonal cancer	92	92/1591	354/7517	0.0150411	0.0660226	1.22789			DO
752	DOID:10487~Hirschsprung's disease	8	8/1591	17/7517	0.0152957	0.0663729	2.22339			DO
753	DOID:9253~gastrointestinal stromal tumor	8	8/1591	17/7517	0.0152957	0.0663729	2.22339			DO
754	DOID:3021~acute kidney failure	6	6/1591	7517-11-01	0.0153597	0.0663729	2.57711			DO
755	DOID:76~stomach disease	24	24/1591	74/7517	0.0155412	0.0668111	1.53234			DO
756	DOID:8541~Sezary's disease	7	7/1591	14/7517	0.0157694	0.0671476	2.36235			DO
757	DOID:520~aortic disease	20	20/1591	59/7517	0.0157805	0.0671476	1.60159			DO
758	DOID:0050338~primary bacterial infectious disease	62	62/1591	228/7517	0.0165126	0.0698054	1.28479			DO
759	DOID:3371~chondrosarcoma	21	21/1591	63/7517	0.0165725	0.0698054	1.5749			DO
760	DOID:381~arthropathy	28	28/1591	90/7517	0.0170435	0.0714286	1.46991			DO
761	DOID:184~bone cancer	64	64/1591	237/7517	0.0174765	0.0728768	1.27587			DO
762	DOID:1247~blood coagulation disease	49	49/1591	175/7517	0.0181739	0.074309	1.32292			DO
763	DOID:0050904~salivary gland carcinoma	19	19/1591	56/7517	0.0181763	0.074309	1.60302			DO
764	DOID:3829~pituitary adenoma	19	19/1591	56/7517	0.0181763	0.074309	1.60302			DO
765	DOID:3962~follicular thyroid carcinoma	19	19/1591	56/7517	0.0181763	0.074309	1.60302			DO
766	DOID:3113~papillary carcinoma	16	16/1591	45/7517	0.01835	0.0746534	1.67989			DO
767	DOID:440~neuromuscular disease	25	25/1591	79/7517	0.0188416	0.076281	1.49516			DO
768	DOID:8618~oral cavity cancer	20	20/1591	60/7517	0.0190891	0.0764072	1.5749			DO
769	DOID:4138~bile duct disease	26	26/1591	83/7517	0.0192187	0.0764072	1.48003			DO
770	DOID:349~systemic mastocytosis	14	14/1591	38/7517	0.0192392	0.0764072	1.74068			DO
771	DOID:3713~ovary adenocarcinoma	14	14/1591	38/7517	0.0192392	0.0764072	1.74068			DO
772	DOID:421~hair disease	21	21/1591	64/7517	0.0198826	0.078588	1.55029			DO
773	DOID:2789~parasitic protozoa infectious disease	36	36/1591	123/7517	0.020303	0.0798713	1.38284			DO
774	DOID:235~colonic benign neoplasm	9	9/1591	21/7517	0.0205237	0.0803606	2.02487			DO
775	DOID:2462~retinal vascular disease	19	19/1591	57/7517	0.0220054	0.0848181	1.5749			DO
776	DOID:8947~diabetic retinopathy	19	19/1591	57/7517	0.0220054	0.0848181	1.5749			DO
777	DOID:5158~pleural cancer	13	13/1591	35/7517	0.022069	0.0848181	1.75489			DO
778	DOID:7474~malignant pleural mesothelioma	13	13/1591	35/7517	0.022069	0.0848181	1.75489			DO
779	DOID:8692~myeloid leukemia	39	39/1591	136/7517	0.0225068	0.0861042	1.35488			DO
780	DOID:4645~retinal cancer	34	34/1591	116/7517	0.023138	0.0881147	1.38483			DO
781	DOID:0060101~benign glioma	7	7/1591	15/7517	0.0242602	0.0907311	2.20486			DO
782	DOID:1148~polydactyly	7	7/1591	15/7517	0.0242602	0.0907311	2.20486			DO
783	DOID:4844~benign ependymoma	7	7/1591	15/7517	0.0242602	0.0907311	2.20486			DO
784	DOID:9206~Barrett's esophagus	7	7/1591	15/7517	0.0242602	0.0907311	2.20486			DO
785	DOID:14069~cerebral malaria	10	10/1591	25/7517	0.0251072	0.0934794	1.88988			DO
786	DOID:4305~bone giant cell tumor	6	6/1591	7517-12-01	0.025298	0.0936951	2.36235			DO
787	DOID:0080006~bone development disease	18	18/1591	54/7517	0.0253898	0.0936951	1.5749			DO
788	DOID:3347~osteosarcoma	57	57/1591	212/7517	0.0259595	0.0953754	1.27032			DO
789	DOID:0050567~orofacial cleft	15	15/1591	43/7517	0.0262645	0.0954596	1.64815			DO
790	DOID:674~cleft palate	15	15/1591	43/7517	0.0262645	0.0954596	1.64815			DO
791	DOID:4007~bladder carcinoma	19	19/1591	58/7517	0.0264225	0.0954596	1.54775			DO
792	DOID:12365~malaria	30	30/1591	101/7517	0.0264402	0.0954596	1.40338			DO
793	DOID:1398~parasitic infectious disease	41	41/1591	146/7517	0.0275651	0.0990916	1.3268			DO
794	DOID:0060119~pharynx cancer	13	13/1591	36/7517	0.0280334	0.100343	1.70614			DO
795	DOID:2043~hepatitis B	52	52/1591	192/7517	0.0284129	0.101266	1.27961			DO
796	DOID:4798~aggressive systemic mastocytosis	11	11/1591	29/7517	0.0290276	0.103017	1.79213			DO
797	DOID:768~retinoblastoma	33	33/1591	114/7517	0.0297311	0.104623	1.36768			DO
798	DOID:771~retinal cell cancer	33	33/1591	114/7517	0.0297311	0.104623	1.36768			DO
799	DOID:5157~benign pleural mesothelioma	14	14/1591	40/7517	0.0303418	0.106324	1.65365			DO
800	DOID:15~reproductive system disease	94	94/1591	373/7517	0.0310236	0.108258	1.19068			DO
801	DOID:214~teeth hard tissue disease	8	8/1591	19/7517	0.0318517	0.110225	1.98935			DO
802	DOID:2876~laryngeal squamous cell carcinoma	8	8/1591	19/7517	0.0318517	0.110225	1.98935			DO
803	DOID:161~keratosis	15	15/1591	44/7517	0.0322844	0.110971	1.61069			DO
804	DOID:13250~diarrhea	12	12/1591	33/7517	0.0323333	0.110971	1.71807			DO
805	DOID:1070~primary open angle glaucoma	16	16/1591	48/7517	0.0339051	0.115416	1.5749			DO
806	DOID:9952~acute lymphocytic leukemia	16	16/1591	48/7517	0.0339051	0.115416	1.5749			DO
807	DOID:7166~thyroiditis	17	17/1591	52/7517	0.0352445	0.119126	1.54461			DO
808	DOID:10976~membranous glomerulonephritis	7	7/1591	16/7517	0.0354236	0.119126	2.06706			DO
809	DOID:2615~papilloma	7	7/1591	16/7517	0.0354236	0.119126	2.06706			DO
810	DOID:3070~malignant glioma	54	54/1591	203/7517	0.0357654	0.119793	1.25682			DO
811	DOID:2723~dermatitis	49	49/1591	182/7517	0.0360388	0.120226	1.27204			DO
812	DOID:2527~nephrosis	18	18/1591	56/7517	0.0363383	0.120577	1.51865			DO
813	DOID:0080000~muscular disease	98	98/1591	393/7517	0.0364334	0.120577	1.17817			DO
814	DOID:3748~esophagus squamous cell carcinoma	19	19/1591	60/7517	0.0372183	0.122688	1.49616			DO
815	DOID:10481~diaphragm disease	6	6/1591	13/7517	0.0387371	0.125707	2.18063			DO
816	DOID:13533~osteopetrosis	6	6/1591	13/7517	0.0387371	0.125707	2.18063			DO
817	DOID:2870~endometrial adenocarcinoma	6	6/1591	13/7517	0.0387371	0.125707	2.18063			DO
818	DOID:3827~congenital diaphragmatic hernia	6	6/1591	13/7517	0.0387371	0.125707	2.18063			DO
819	DOID:9973~substance dependence	15	15/1591	45/7517	0.0392516	0.126883	1.5749			DO
820	DOID:811~lipodystrophy	12	12/1591	34/7517	0.0406413	0.128596	1.66754			DO
821	DOID:14203~childhood type dermatomyositis	5	5/1591	7517-10-01	0.041015	0.128596	2.36235			DO
822	DOID:1558~angioedema	5	5/1591	7517-10-01	0.041015	0.128596	2.36235			DO
823	DOID:3737~verrucous carcinoma	5	5/1591	7517-10-01	0.041015	0.128596	2.36235			DO
824	DOID:4465~papillary renal cell carcinoma	5	5/1591	7517-10-01	0.041015	0.128596	2.36235			DO
825	DOID:6536~plasma cell neoplasm	5	5/1591	7517-10-01	0.041015	0.128596	2.36235			DO
826	DOID:8929~atrophic gastritis	5	5/1591	7517-10-01	0.041015	0.128596	2.36235			DO
827	DOID:9993~hypoglycemia	5	5/1591	7517-10-01	0.041015	0.128596	2.36235			DO
828	DOID:1883~hepatitis C	59	59/1591	226/7517	0.0413034	0.129015	1.23344			DO
829	DOID:8283~peritonitis	8	8/1591	20/7517	0.0435044	0.135383	1.88988			DO
830	DOID:1686~glaucoma	29	29/1591	101/7517	0.043861	0.135985	1.3566			DO
831	DOID:4195~hyperglycemia	37	37/1591	134/7517	0.0443245	0.136914	1.30458			DO
832	DOID:2916~hypersensitivity reaction type IV disease	25	25/1591	85/7517	0.0448924	0.137906	1.38962			DO
833	DOID:13241~Behcet's disease	24	24/1591	81/7517	0.0449764	0.137906	1.39991			DO
834	DOID:10595~Charcot-Marie-Tooth disease	11	11/1591	31/7517	0.047137	0.143242	1.67651			DO
835	DOID:11394~adult respiratory distress syndrome	11	11/1591	31/7517	0.047137	0.143242	1.67651			DO
836	DOID:345~uterine disease	15	15/1591	46/7517	0.047232	0.143242	1.54066			DO
837	DOID:9119~acute myeloid leukemia	29	29/1591	102/7517	0.0493239	0.148332	1.3433			DO
838	DOID:11971~synostosis	7	7/1591	17/7517	0.0495132	0.148332	1.94547			DO
839	DOID:171~neuroectodermal tumor	7	7/1591	17/7517	0.0495132	0.148332	1.94547			DO
840	DOID:1184~nephrotic syndrome	17	17/1591	54/7517	0.0496219	0.148332	1.48741			DO
841	DOID:0050621~respiratory system benign neoplasm	12	12/1591	35/7517	0.0503312	0.148506	1.6199			DO
842	DOID:2596~larynx cancer	12	12/1591	35/7517	0.0503312	0.148506	1.6199			DO
843	DOID:9261~nasopharynx carcinoma	12	12/1591	35/7517	0.0503312	0.148506	1.6199			DO
844	DOID:4535~hypotrichosis	18	18/1591	58/7517	0.0503925	0.148506	1.46629			DO
845	DOID:3326~purpura	21	21/1591	70/7517	0.0514763	0.151166	1.41741			DO
846	DOID:437~myasthenia gravis	13	13/1591	39/7517	0.0528435	0.154637	1.5749			DO
847	DOID:6000~congestive heart failure	57	57/1591	221/7517	0.0544187	0.158689	1.21859			DO
848	DOID:3149~keratoacanthoma	6	6/1591	14/7517	0.0559628	0.162624	2.02487			DO
849	DOID:7693~abdominal aortic aneurysm	15	15/1591	47/7517	0.056284	0.162989	1.50788			DO
850	DOID:11476~osteoporosis	27	27/1591	95/7517	0.0565907	0.16331	1.34281			DO
851	DOID:3087~gingivitis	8	8/1591	21/7517	0.0576464	0.165783	1.79989			DO
852	DOID:4989~pancreatitis	31	31/1591	112/7517	0.0598718	0.171591	1.30773			DO
853	DOID:50~thyroid gland disease	41	41/1591	154/7517	0.0603215	0.172288	1.25788			DO
854	DOID:2566~corneal dystrophy	5	5/1591	7517-11-01	0.0623945	0.176997	2.14759			DO
855	DOID:4724~brain edema	5	5/1591	7517-11-01	0.0623945	0.176997	2.14759			DO
856	DOID:0060122~integumentary system cancer	27	27/1591	96/7517	0.0634484	0.178168	1.32882			DO
857	DOID:0080011~bone resorption disease	27	27/1591	96/7517	0.0634484	0.178168	1.32882			DO
858	DOID:4159~skin cancer	27	27/1591	96/7517	0.0634484	0.178168	1.32882			DO
859	DOID:439~neuromuscular junction disease	13	13/1591	40/7517	0.0636776	0.178212	1.53553			DO
860	DOID:5683~hereditary breast ovarian cancer	55	55/1591	215/7517	0.0660788	0.184313	1.20864			DO
861	DOID:8719~in situ carcinoma	7	7/1591	18/7517	0.0666891	0.185396	1.83738			DO
862	DOID:399~tuberculosis	40	40/1591	151/7517	0.0672573	0.185654	1.25158			DO
863	DOID:10871~age related macular degeneration	20	20/1591	68/7517	0.067712	0.185654	1.38962			DO
864	DOID:2007~degeneration of macula and posterior pole	20	20/1591	68/7517	0.067712	0.185654	1.38962			DO
865	DOID:3068~glioblastoma multiforme	20	20/1591	68/7517	0.067712	0.185654	1.38962			DO
866	DOID:576~proteinuria	19	19/1591	64/7517	0.0678951	0.185654	1.40265			DO
867	DOID:3947~adrenal gland hyperfunction	10	10/1591	29/7517	0.0683098	0.186178	1.62921			DO
868	DOID:3355~fibrosarcoma	11	11/1591	33/7517	0.071686	0.194111	1.5749			DO
869	DOID:3443~mammary Paget's disease	11	11/1591	33/7517	0.071686	0.194111	1.5749			DO
870	DOID:423~myopathy	93	93/1591	383/7517	0.0725852	0.195277	1.14725			DO
871	DOID:66~muscle tissue disease	93	93/1591	383/7517	0.0725852	0.195277	1.14725			DO
872	DOID:866~vein disease	12	12/1591	37/7517	0.0741459	0.197556	1.53234			DO
873	DOID:1800~neuroendocrine carcinoma	8	8/1591	22/7517	0.0743796	0.197556	1.71807			DO
874	DOID:631~fibromyalgia	8	8/1591	22/7517	0.0743796	0.197556	1.71807			DO
875	DOID:649~prion disease	8	8/1591	22/7517	0.0743796	0.197556	1.71807			DO
876	DOID:3069~astrocytoma	30	30/1591	110/7517	0.0747928	0.19758	1.28855			DO
877	DOID:11335~sarcoidosis	23	23/1591	81/7517	0.0748623	0.19758	1.34158			DO
878	DOID:2841~asthma	34	34/1591	127/7517	0.0761935	0.200459	1.26488			DO
879	DOID:3458~breast adenocarcinoma	14	14/1591	45/7517	0.0770639	0.201566	1.46991			DO
880	DOID:11949~Creutzfeldt-Jakob disease	6	6/1591	15/7517	0.0770979	0.201566	1.88988			DO
881	DOID:3376~bone osteosarcoma	15	15/1591	49/7517	0.0777867	0.201776	1.44634			DO
882	DOID:5844~myocardial infarction	68	68/1591	274/7517	0.0778524	0.201776	1.17255			DO
883	DOID:10124~corneal disease	18	18/1591	61/7517	0.0780364	0.201776	1.39417			DO
884	DOID:438~autoimmune disease of the nervous system	16	16/1591	53/7517	0.0781458	0.201776	1.42632			DO
885	DOID:4440~seminoma	9	9/1591	26/7517	0.0798885	0.205639	1.63547			DO
886	DOID:7998~hyperthyroidism	26	26/1591	94/7517	0.0802123	0.205837	1.30683			DO
887	DOID:2355~anemia	59	59/1591	236/7517	0.0849612	0.217355	1.18118			DO
888	DOID:3247~rhabdomyosarcoma	22	22/1591	78/7517	0.0852462	0.217417	1.33261			DO
889	DOID:10223~dermatomyositis	11	11/1591	34/7517	0.0865334	0.219358	1.52858			DO
890	DOID:3683~lung benign neoplasm	11	11/1591	34/7517	0.0865334	0.219358	1.52858			DO
891	DOID:4448~macular degeneration	20	20/1591	70/7517	0.0874038	0.220893	1.34991			DO
892	DOID:3973~thyroid medullary carcinoma	12	12/1591	38/7517	0.0883655	0.222649	1.49201			DO
893	DOID:1785~pituitary cancer	5	5/1591	7517-12-01	0.088892	0.22276	1.96863			DO
894	DOID:0060095~uterine benign neoplasm	13	13/1591	42/7517	0.0895083	0.22276	1.46241			DO
895	DOID:10923~sickle cell anemia	13	13/1591	42/7517	0.0895083	0.22276	1.46241			DO
896	DOID:13223~uterine fibroid	13	13/1591	42/7517	0.0895083	0.22276	1.46241			DO
897	DOID:1067~open-angle glaucoma	17	17/1591	58/7517	0.089745	0.22276	1.38483			DO
898	DOID:0050622~reproductive organ benign neoplasm	14	14/1591	46/7517	0.0901154	0.223015	1.43795			DO
899	DOID:3146~lipid metabolism disorder	25	25/1591	91/7517	0.0907487	0.223918	1.29799			DO
900	DOID:10126~keratoconus	8	8/1591	23/7517	0.0937381	0.230612	1.64337			DO
901	DOID:11612~polycystic ovary syndrome	42	42/1591	164/7517	0.0966208	0.237005	1.20998			DO
902	DOID:865~vasculitis	31	31/1591	117/7517	0.0975258	0.238524	1.25184			DO
903	DOID:1564~fungal infectious disease	20	20/1591	71/7517	0.0985208	0.240253	1.3309			DO
904	DOID:13564~aspergillosis	6	6/1591	16/7517	0.102102	0.247539	1.77176			DO
905	DOID:2256~osteochondrodysplasia	6	6/1591	16/7517	0.102102	0.247539	1.77176			DO
906	DOID:4928~intrahepatic cholangiocarcinoma	11	11/1591	35/7517	0.103126	0.249296	1.48491			DO
907	DOID:987~alopecia	15	15/1591	51/7517	0.104015	0.249616	1.38962			DO
908	DOID:11077~brucellosis	12	12/1591	39/7517	0.104153	0.249616	1.45375			DO
909	DOID:26~pancreas disease	42	42/1591	165/7517	0.104156	0.249616	1.20265			DO
910	DOID:615~leukopenia	14	14/1591	47/7517	0.104468	0.249646	1.40736			DO
911	DOID:10286~prostate carcinoma	31	31/1591	118/7517	0.106599	0.253289	1.24124			DO
912	DOID:633~myositis	22	22/1591	80/7517	0.1066	0.253289	1.29929			DO
913	DOID:10754~otitis media	7	7/1591	20/7517	0.110438	0.259451	1.65365			DO
914	DOID:12252~Cushing's syndrome	7	7/1591	20/7517	0.110438	0.259451	1.65365			DO
915	DOID:706~mature B-cell neoplasm	7	7/1591	20/7517	0.110438	0.259451	1.65365			DO
916	DOID:707~B-cell lymphoma	7	7/1591	20/7517	0.110438	0.259451	1.65365			DO
917	DOID:28~endocrine system disease	91	91/1591	383/7517	0.113709	0.266386	1.12258			DO
918	DOID:3151~skin squamous cell carcinoma	8	8/1591	24/7517	0.115688	0.269195	1.5749			DO
919	DOID:4468~clear cell adenocarcinoma	8	8/1591	24/7517	0.115688	0.269195	1.5749			DO
920	DOID:1100~ovarian disease	17	17/1591	60/7517	0.115916	0.269195	1.33867			DO
921	DOID:10825~essential hypertension	31	31/1591	119/7517	0.116199	0.269195	1.2308			DO
922	DOID:11201~parathyroid gland disease	9	9/1591	28/7517	0.118887	0.273901	1.51865			DO
923	DOID:9446~cholangitis	9	9/1591	28/7517	0.118887	0.273901	1.51865			DO
924	DOID:12241~beta thalassemia	5	5/1591	13/7517	0.120239	0.273987	1.81719			DO
925	DOID:13608~biliary atresia	5	5/1591	13/7517	0.120239	0.273987	1.81719			DO
926	DOID:1803~neuritis	5	5/1591	13/7517	0.120239	0.273987	1.81719			DO
927	DOID:3086~gingival overgrowth	5	5/1591	13/7517	0.120239	0.273987	1.81719			DO
928	DOID:0060115~nervous system benign neoplasm	10	10/1591	32/7517	0.120671	0.274224	1.47647			DO
929	DOID:0060086~female reproductive organ benign neoplasm	13	13/1591	44/7517	0.121011	0.274247	1.39593			DO
930	DOID:3405~histiocytosis	11	11/1591	36/7517	0.12145	0.274498	1.44366			DO
931	DOID:1176~bronchial disease	37	37/1591	146/7517	0.127005	0.286277	1.19736			DO
932	DOID:11836~clubfoot	6	6/1591	17/7517	0.130787	0.290657	1.66754			DO
933	DOID:1273~respiratory syncytial virus infectious disease	6	6/1591	17/7517	0.130787	0.290657	1.66754			DO
934	DOID:365~bladder disease	6	6/1591	17/7517	0.130787	0.290657	1.66754			DO
935	DOID:84~osteochondritis dissecans	6	6/1591	17/7517	0.130787	0.290657	1.66754			DO
936	DOID:8923~skin melanoma	6	6/1591	17/7517	0.130787	0.290657	1.66754			DO
937	DOID:4043~skeletal muscle cancer	22	22/1591	82/7517	0.13104	0.290657	1.2676			DO
938	DOID:11260~rabies	16	16/1591	57/7517	0.132843	0.293098	1.32623			DO
939	DOID:3451~skin carcinoma	16	16/1591	57/7517	0.132843	0.293098	1.32623			DO
940	DOID:3702~cervical adenocarcinoma	7	7/1591	21/7517	0.136833	0.299525	1.5749			DO
941	DOID:3953~adrenal gland cancer	7	7/1591	21/7517	0.136833	0.299525	1.5749			DO
942	DOID:4914~esophagus adenocarcinoma	7	7/1591	21/7517	0.136833	0.299525	1.5749			DO
943	DOID:3952~adrenal cortex disease	13	13/1591	45/7517	0.138864	0.300127	1.36491			DO
944	DOID:3393~coronary artery disease	80	80/1591	338/7517	0.139406	0.300127	1.11827			DO
945	DOID:13543~hyperparathyroidism	8	8/1591	25/7517	0.140129	0.300127	1.5119			DO
946	DOID:1934~dysostosis	8	8/1591	25/7517	0.140129	0.300127	1.5119			DO
947	DOID:1279~ocular motility disease	11	11/1591	37/7517	0.141464	0.300127	1.40464			DO
948	DOID:13189~gout	9	9/1591	29/7517	0.141647	0.300127	1.46629			DO
949	DOID:3007~breast ductal carcinoma	9	9/1591	29/7517	0.141647	0.300127	1.46629			DO
950	DOID:8029~sporadic breast cancer	9	9/1591	29/7517	0.141647	0.300127	1.46629			DO
951	DOID:1227~neutropenia	10	10/1591	33/7517	0.14197	0.300127	1.43173			DO
952	DOID:12987~agranulocytosis	10	10/1591	33/7517	0.14197	0.300127	1.43173			DO
953	DOID:0060099~musculoskeletal system benign neoplasm	4	4/1591	7517-10-01	0.142147	0.300127	1.88988			DO
954	DOID:2340~craniosynostosis	4	4/1591	7517-10-01	0.142147	0.300127	1.88988			DO
955	DOID:3307~teratoma	4	4/1591	7517-10-01	0.142147	0.300127	1.88988			DO
956	DOID:3493~signet ring cell adenocarcinoma	4	4/1591	7517-10-01	0.142147	0.300127	1.88988			DO
957	DOID:303~substance-related disorder	17	17/1591	62/7517	0.146203	0.307136	1.29548			DO
958	DOID:750~peptic ulcer disease	17	17/1591	62/7517	0.146203	0.307136	1.29548			DO
959	DOID:4481~allergic rhinitis	25	25/1591	96/7517	0.146845	0.307709	1.23039			DO
960	DOID:11162~respiratory failure	15	15/1591	54/7517	0.152283	0.318307	1.31242			DO
961	DOID:1123~spondyloarthropathy	19	19/1591	71/7517	0.155249	0.323694	1.26436			DO
962	DOID:12176~goiter	5	5/1591	14/7517	0.155948	0.32434	1.68739			DO
963	DOID:9553~adrenal gland disease	13	13/1591	46/7517	0.158068	0.327932	1.33524			DO
964	DOID:784~chronic kidney failure	18	18/1591	67/7517	0.159013	0.32877	1.26932			DO
965	DOID:2163~nasal cavity disease	25	25/1591	97/7517	0.160049	0.32877	1.21771			DO
966	DOID:2825~nose disease	25	25/1591	97/7517	0.160049	0.32877	1.21771			DO
967	DOID:4483~rhinitis	25	25/1591	97/7517	0.160049	0.32877	1.21771			DO
968	DOID:3310~atopic dermatitis	36	36/1591	145/7517	0.161457	0.330849	1.17303			DO
969	DOID:660~adrenal cortex cancer	6	6/1591	18/7517	0.162837	0.332857	1.5749			DO
970	DOID:11123~Henoch-Schoenlein purpura	7	7/1591	22/7517	0.165978	0.334608	1.50331			DO
971	DOID:1557~hypersensitivity reaction type III disease	7	7/1591	22/7517	0.165978	0.334608	1.50331			DO
972	DOID:640~encephalomyelitis	7	7/1591	22/7517	0.165978	0.334608	1.50331			DO
973	DOID:6741~bilateral breast cancer	7	7/1591	22/7517	0.165978	0.334608	1.50331			DO
974	DOID:9809~hypersensitivity vasculitis	7	7/1591	22/7517	0.165978	0.334608	1.50331			DO
975	DOID:13580~cholestasis	16	16/1591	59/7517	0.166731	0.334608	1.28127			DO
976	DOID:780~placenta disease	8	8/1591	26/7517	0.166903	0.334608	1.45375			DO
977	DOID:9471~meningitis	8	8/1591	26/7517	0.166903	0.334608	1.45375			DO
978	DOID:974~upper respiratory tract disease	30	30/1591	120/7517	0.176835	0.35367	1.18118			DO
979	DOID:1168~familial hyperlipidemia	21	21/1591	81/7517	0.178137	0.355422	1.22492			DO
980	DOID:10603~glucose intolerance	12	12/1591	43/7517	0.182462	0.363181	1.31852			DO
981	DOID:1024~leprosy	11	11/1591	39/7517	0.186253	0.363243	1.33261			DO
982	DOID:5426~premature ovarian failure	11	11/1591	39/7517	0.186253	0.363243	1.33261			DO
983	DOID:11396~pulmonary edema	4	4/1591	7517-11-01	0.187719	0.363243	1.71807			DO
984	DOID:11400~pyelonephritis	4	4/1591	7517-11-01	0.187719	0.363243	1.71807			DO
985	DOID:12337~varicocele	4	4/1591	7517-11-01	0.187719	0.363243	1.71807			DO
986	DOID:13976~peptic esophagitis	4	4/1591	7517-11-01	0.187719	0.363243	1.71807			DO
987	DOID:203~exostosis	4	4/1591	7517-11-01	0.187719	0.363243	1.71807			DO
988	DOID:2089~constipation	4	4/1591	7517-11-01	0.187719	0.363243	1.71807			DO
989	DOID:2744~pyelitis	4	4/1591	7517-11-01	0.187719	0.363243	1.71807			DO
990	DOID:539~ophthalmoplegia	4	4/1591	7517-11-01	0.187719	0.363243	1.71807			DO
991	DOID:9742~pelvic varices	4	4/1591	7517-11-01	0.187719	0.363243	1.71807			DO
992	DOID:9779~bowel dysfunction	4	4/1591	7517-11-01	0.187719	0.363243	1.71807			DO
993	DOID:13207~proliferative diabetic retinopathy	10	10/1591	35/7517	0.189845	0.366506	1.34991			DO
994	DOID:10808~gastric ulcer	5	5/1591	15/7517	0.195373	0.371971	1.5749			DO
995	DOID:14268~sclerosing cholangitis	5	5/1591	15/7517	0.195373	0.371971	1.5749			DO
996	DOID:1679~cystitis	5	5/1591	15/7517	0.195373	0.371971	1.5749			DO
997	DOID:3265~chronic granulomatous disease	5	5/1591	15/7517	0.195373	0.371971	1.5749			DO
998	DOID:3948~adrenocortical carcinoma	5	5/1591	15/7517	0.195373	0.371971	1.5749			DO
999	DOID:2001~neuroma	8	8/1591	27/7517	0.195798	0.371971	1.39991			DO
1000	DOID:2513~basal cell carcinoma	8	8/1591	27/7517	0.195798	0.371971	1.39991			DO
1001	DOID:2731~vesiculobullous skin disease	6	6/1591	19/7517	0.197833	0.373287	1.49201			DO
1002	DOID:447~renal tubular transport disease	6	6/1591	19/7517	0.197833	0.373287	1.49201			DO
1003	DOID:540~strabismus	6	6/1591	19/7517	0.197833	0.373287	1.49201			DO
1004	DOID:12930~dilated cardiomyopathy	23	23/1591	91/7517	0.199349	0.375298	1.19416			DO
1005	DOID:12361~Graves' disease	20	20/1591	78/7517	0.199976	0.375335	1.21146			DO
1006	DOID:8778~Crohn's disease	13	13/1591	48/7517	0.200269	0.375335	1.27961			DO
1007	DOID:612~primary immunodeficiency disease	46	46/1591	193/7517	0.201737	0.377239	1.12609			DO
1008	DOID:5679~retinal disease	79	79/1591	343/7517	0.21099	0.393659	1.0882			DO
1009	DOID:783~end stage renal failure	10	10/1591	36/7517	0.21615	0.402387	1.31242			DO
1010	DOID:0060121~integumentary system benign neoplasm	9	9/1591	32/7517	0.22144	0.406786	1.32882			DO
1011	DOID:13375~temporal arteritis	9	9/1591	32/7517	0.22144	0.406786	1.32882			DO
1012	DOID:2706~synovium cancer	9	9/1591	32/7517	0.22144	0.406786	1.32882			DO
1013	DOID:3165~skin benign neoplasm	9	9/1591	32/7517	0.22144	0.406786	1.32882			DO
1014	DOID:525~central nervous system vasculitis	9	9/1591	32/7517	0.22144	0.406786	1.32882			DO
1015	DOID:5485~synovial sarcoma	9	9/1591	32/7517	0.22144	0.406786	1.32882			DO
1016	DOID:8466~retinal degeneration	58	58/1591	249/7517	0.222706	0.408212	1.10053			DO
1017	DOID:6590~spondylitis	16	16/1591	62/7517	0.22497	0.410558	1.21928			DO
1018	DOID:7147~ankylosing spondylitis	16	16/1591	62/7517	0.22497	0.410558	1.21928			DO
1019	DOID:3480~uveal disease	12	12/1591	45/7517	0.229739	0.414851	1.25992			DO
1020	DOID:6364~migraine	18	18/1591	71/7517	0.231191	0.414851	1.19781			DO
1021	DOID:0060118~thoracic disease	7	7/1591	24/7517	0.231305	0.414851	1.37804			DO
1022	DOID:3463~breast disease	7	7/1591	24/7517	0.231305	0.414851	1.37804			DO
1023	DOID:9452~fatty liver disease	23	23/1591	93/7517	0.232428	0.414851	1.16847			DO
1024	DOID:13406~pulmonary sarcoidosis	6	6/1591	20/7517	0.235288	0.414851	1.41741			DO
1025	DOID:1827~idiopathic generalized epilepsy	6	6/1591	20/7517	0.235288	0.414851	1.41741			DO
1026	DOID:0050704~childhood electroclinical syndrome	4	4/1591	7517-12-01	0.237133	0.414851	1.5749			DO
1027	DOID:1089~tethered spinal cord syndrome	4	4/1591	7517-12-01	0.237133	0.414851	1.5749			DO
1028	DOID:12571~phacogenic glaucoma	4	4/1591	7517-12-01	0.237133	0.414851	1.5749			DO
1029	DOID:13641~exfoliation syndrome	4	4/1591	7517-12-01	0.237133	0.414851	1.5749			DO
1030	DOID:1825~childhood absence epilepsy	4	4/1591	7517-12-01	0.237133	0.414851	1.5749			DO
1031	DOID:3382~liposarcoma	4	4/1591	7517-12-01	0.237133	0.414851	1.5749			DO
1032	DOID:3939~lipomatous cancer	4	4/1591	7517-12-01	0.237133	0.414851	1.5749			DO
1033	DOID:614~lymphopenia	4	4/1591	7517-12-01	0.237133	0.414851	1.5749			DO
1034	DOID:8502~bullous skin disease	4	4/1591	7517-12-01	0.237133	0.414851	1.5749			DO
1035	DOID:962~neurofibroma	4	4/1591	7517-12-01	0.237133	0.414851	1.5749			DO
1036	DOID:2957~pulmonary tuberculosis	5	5/1591	16/7517	0.237768	0.414851	1.47647			DO
1037	DOID:4539~labyrinthine disease	5	5/1591	16/7517	0.237768	0.414851	1.47647			DO
1038	DOID:5241~hemangioblastoma	5	5/1591	16/7517	0.237768	0.414851	1.47647			DO
1039	DOID:61~mitral valve disease	5	5/1591	16/7517	0.237768	0.414851	1.47647			DO
1040	DOID:9588~encephalitis	14	14/1591	54/7517	0.239255	0.416574	1.22492			DO
1041	DOID:2473~opportunistic mycosis	10	10/1591	37/7517	0.243812	0.423623	1.27695			DO
1042	DOID:4079~heart valve disease	13	13/1591	50/7517	0.24694	0.427462	1.22842			DO
1043	DOID:10608~celiac disease	21	21/1591	85/7517	0.247046	0.427462	1.16728			DO
1044	DOID:3602~toxic encephalopathy	12	12/1591	46/7517	0.255035	0.440371	1.23253			DO
1045	DOID:75~lymphatic system disease	24	24/1591	99/7517	0.259645	0.446483	1.14538			DO
1046	DOID:9884~muscular dystrophy	24	24/1591	99/7517	0.259645	0.446483	1.14538			DO
1047	DOID:3192~neurilemmoma	7	7/1591	25/7517	0.266762	0.456838	1.32292			DO
1048	DOID:687~hepatoblastoma	7	7/1591	25/7517	0.266762	0.456838	1.32292			DO
1049	DOID:1596~mental depression	10	10/1591	38/7517	0.272639	0.465944	1.24334			DO
1050	DOID:0060031~autoimmune disease of gastrointestinal tract	24	24/1591	100/7517	0.277403	0.473116	1.13393			DO
1051	DOID:0080015~physical disorder	32	32/1591	136/7517	0.278219	0.473541	1.11169			DO
1052	DOID:1272~telangiectasis	9	9/1591	34/7517	0.282264	0.47667	1.25066			DO
1053	DOID:3262~phagocyte bactericidal dysfunction	5	5/1591	17/7517	0.282344	0.47667	1.38962			DO
1054	DOID:4248~coronary stenosis	5	5/1591	17/7517	0.282344	0.47667	1.38962			DO
1055	DOID:8689~anorexia nervosa	5	5/1591	17/7517	0.282344	0.47667	1.38962			DO
1056	DOID:12689~acoustic neuroma	4	4/1591	13/7517	0.289086	0.486084	1.45375			DO
1057	DOID:288~endometriosis of uterus	4	4/1591	13/7517	0.289086	0.486084	1.45375			DO
1058	DOID:5656~cranial nerve disease	16	16/1591	65/7517	0.290565	0.487588	1.163			DO
1059	DOID:14330~Parkinson's disease	40	40/1591	174/7517	0.303452	0.506326	1.08614			DO
1060	DOID:11963~esophagitis	7	7/1591	26/7517	0.303553	0.506326	1.27204			DO
1061	DOID:13809~familial combined hyperlipidemia	7	7/1591	26/7517	0.303553	0.506326	1.27204			DO
1062	DOID:3498~pancreatic ductal adenocarcinoma	23	23/1591	97/7517	0.304945	0.507632	1.12029			DO
1063	DOID:8567~Hodgkin's lymphoma	12	12/1591	48/7517	0.308249	0.512111	1.18118			DO
1064	DOID:1602~lymphadenitis	14	14/1591	57/7517	0.311712	0.515809	1.16045			DO
1065	DOID:9942~lymph node disease	14	14/1591	57/7517	0.311712	0.515809	1.16045			DO
1066	DOID:12716~newborn respiratory distress syndrome	9	9/1591	35/7517	0.314255	0.518988	1.21492			DO
1067	DOID:0060005~autoimmune disease of endocrine system	20	20/1591	84/7517	0.314956	0.519117	1.12493			DO
1068	DOID:9455~lipid storage disease	29	29/1591	125/7517	0.320145	0.526629	1.09613			DO
1069	DOID:13378~Kawasaki disease	13	13/1591	53/7517	0.323361	0.530872	1.15889			DO
1070	DOID:2742~auditory system disease	21	21/1591	89/7517	0.325034	0.53257	1.11482			DO
1071	DOID:10325~silicosis	5	5/1591	18/7517	0.328308	0.533741	1.31242			DO
1072	DOID:10883~herpangina	5	5/1591	18/7517	0.328308	0.533741	1.31242			DO
1073	DOID:2048~autoimmune hepatitis	5	5/1591	18/7517	0.328308	0.533741	1.31242			DO
1074	DOID:2730~epidermolysis bullosa	5	5/1591	18/7517	0.328308	0.533741	1.31242			DO
1075	DOID:0050136~systemic mycosis	10	10/1591	40/7517	0.332965	0.540258	1.18118			DO
1076	DOID:2154~nephroblastoma	18	18/1591	76/7517	0.336798	0.545416	1.11901			DO
1077	DOID:655~inherited metabolic disorder	72	72/1591	324/7517	0.338461	0.546958	1.04993			DO
1078	DOID:13129~severe pre-eclampsia	7	7/1591	27/7517	0.341267	0.546958	1.22492			DO
1079	DOID:13141~uveitis	7	7/1591	27/7517	0.341267	0.546958	1.22492			DO
1080	DOID:1724~duodenal ulcer	7	7/1591	27/7517	0.341267	0.546958	1.22492			DO
1081	DOID:9834~hyperopia	7	7/1591	27/7517	0.341267	0.546958	1.22492			DO
1082	DOID:3650~lactic acidosis	4	4/1591	14/7517	0.342341	0.546958	1.34991			DO
1083	DOID:4231~histiocytoma	4	4/1591	14/7517	0.342341	0.546958	1.34991			DO
1084	DOID:5223~infertility	45	45/1591	200/7517	0.346744	0.549216	1.06306			DO
1085	DOID:12704~ataxia telangiectasia	9	9/1591	36/7517	0.346957	0.549216	1.18118			DO
1086	DOID:0060049~autoimmune disease of urogenital tract	17	17/1591	72/7517	0.348667	0.549216	1.11555			DO
1087	DOID:12236~primary biliary cirrhosis	17	17/1591	72/7517	0.348667	0.549216	1.11555			DO
1088	DOID:5183~hereditary Wilms' tumor	13	13/1591	54/7517	0.350029	0.549216	1.13743			DO
1089	DOID:12554~hemolytic-uremic syndrome	6	6/1591	23/7517	0.357022	0.549216	1.23253			DO
1090	DOID:0050825~endocardium disease	3	3/1591	7517-10-01	0.357583	0.549216	1.41741			DO
1091	DOID:0060050~autoimmune disease of blood	3	3/1591	7517-10-01	0.357583	0.549216	1.41741			DO
1092	DOID:1159~functional gastric disease	3	3/1591	7517-10-01	0.357583	0.549216	1.41741			DO
1093	DOID:13025~retinopathy of prematurity	3	3/1591	7517-10-01	0.357583	0.549216	1.41741			DO
1094	DOID:1498~cholera	3	3/1591	7517-10-01	0.357583	0.549216	1.41741			DO
1095	DOID:2843~long QT syndrome	3	3/1591	7517-10-01	0.357583	0.549216	1.41741			DO
1096	DOID:3314~angiomyolipoma	3	3/1591	7517-10-01	0.357583	0.549216	1.41741			DO
1097	DOID:3587~pancreatic ductal carcinoma	3	3/1591	7517-10-01	0.357583	0.549216	1.41741			DO
1098	DOID:4051~alveolar rhabdomyosarcoma	3	3/1591	7517-10-01	0.357583	0.549216	1.41741			DO
1099	DOID:4233~clear cell sarcoma	3	3/1591	7517-10-01	0.357583	0.549216	1.41741			DO
1100	DOID:4988~alcoholic pancreatitis	3	3/1591	7517-10-01	0.357583	0.549216	1.41741			DO
1101	DOID:5200~urinary tract obstruction	3	3/1591	7517-10-01	0.357583	0.549216	1.41741			DO
1102	DOID:6196~reactive arthritis	3	3/1591	7517-10-01	0.357583	0.549216	1.41741			DO
1103	DOID:8437~intestinal obstruction	3	3/1591	7517-10-01	0.357583	0.549216	1.41741			DO
1104	DOID:8927~learning disability	3	3/1591	7517-10-01	0.357583	0.549216	1.41741			DO
1105	DOID:2228~thrombocytosis	8	8/1591	32/7517	0.362352	0.555518	1.18118			DO
1106	DOID:4676~uremia	5	5/1591	19/7517	0.374907	0.573229	1.24334			DO
1107	DOID:1307~dementia	32	32/1591	142/7517	0.375604	0.573229	1.06472			DO
1108	DOID:1205~hypersensitivity reaction type I disease	27	27/1591	119/7517	0.375967	0.573229	1.07199			DO
1109	DOID:10241~thalassemia	11	11/1591	46/7517	0.379012	0.576818	1.12982			DO
1110	DOID:255~hemangioma	9	9/1591	37/7517	0.380111	0.577436	1.14925			DO
1111	DOID:341~peripheral vascular disease	14	14/1591	60/7517	0.388981	0.589837	1.10243			DO
1112	DOID:4621~holoprosencephaly	4	4/1591	15/7517	0.395784	0.597318	1.25992			DO
1113	DOID:5389~oxyphilic adenoma	4	4/1591	15/7517	0.395784	0.597318	1.25992			DO
1114	DOID:4251~conjunctival disease	8	8/1591	33/7517	0.397908	0.597318	1.14538			DO
1115	DOID:2452~thrombophilia	6	6/1591	24/7517	0.398928	0.597318	1.18118			DO
1116	DOID:4531~mucoepidermoid carcinoma	6	6/1591	24/7517	0.398928	0.597318	1.18118			DO
1117	DOID:6543~acne	6	6/1591	24/7517	0.398928	0.597318	1.18118			DO
1118	DOID:9098~sebaceous gland disease	6	6/1591	24/7517	0.398928	0.597318	1.18118			DO
1119	DOID:0050736~autosomal dominant disease	86	86/1591	395/7517	0.4012	0.599642	1.02867			DO
1120	DOID:0050890~synucleinopathy	45	45/1591	204/7517	0.403336	0.601756	1.04221			DO
1121	DOID:1712~aortic valve stenosis	7	7/1591	29/7517	0.417873	0.621	1.14045			DO
1122	DOID:1387~hypolipoproteinemia	3	3/1591	7517-11-01	0.421282	0.621	1.28855			DO
1123	DOID:154~mixed cell type cancer	3	3/1591	7517-11-01	0.421282	0.621	1.28855			DO
1124	DOID:1680~chronic cystitis	3	3/1591	7517-11-01	0.421282	0.621	1.28855			DO
1125	DOID:656~adrenal adenoma	3	3/1591	7517-11-01	0.421282	0.621	1.28855			DO
1126	DOID:3369~peripheral primitive neuroectodermal tumor	5	5/1591	20/7517	0.421446	0.621	1.18118			DO
1127	DOID:4752~multiple system atrophy	5	5/1591	20/7517	0.421446	0.621	1.18118			DO
1128	DOID:110~lens disease	13	13/1591	57/7517	0.431702	0.631647	1.07756			DO
1129	DOID:583~hemolytic anemia	13	13/1591	57/7517	0.431702	0.631647	1.07756			DO
1130	DOID:720~normocytic anemia	13	13/1591	57/7517	0.431702	0.631647	1.07756			DO
1131	DOID:83~cataract	13	13/1591	57/7517	0.431702	0.631647	1.07756			DO
1132	DOID:4971~myelofibrosis	11	11/1591	48/7517	0.438801	0.640911	1.08274			DO
1133	DOID:986~alopecia areata	6	6/1591	25/7517	0.440664	0.642507	1.13393			DO
1134	DOID:9778~irritable bowel syndrome	17	17/1591	76/7517	0.443073	0.644891	1.05684			DO
1135	DOID:0050339~commensal bacterial infectious disease	9	9/1591	39/7517	0.446776	0.647079	1.09032			DO
1136	DOID:12205~dengue disease	4	4/1591	16/7517	0.448455	0.647079	1.18118			DO
1137	DOID:1993~rectum cancer	4	4/1591	16/7517	0.448455	0.647079	1.18118			DO
1138	DOID:240~iris disease	4	4/1591	16/7517	0.448455	0.647079	1.18118			DO
1139	DOID:5395~functioning pituitary adenoma	4	4/1591	16/7517	0.448455	0.647079	1.18118			DO
1140	DOID:6713~cerebrovascular disease	25	25/1591	114/7517	0.457303	0.658705	1.03612			DO
1141	DOID:14227~azoospermia	10	10/1591	44/7517	0.458344	0.658921	1.0738			DO
1142	DOID:1428~endocrine pancreas disease	13	13/1591	58/7517	0.459033	0.658921	1.05898			DO
1143	DOID:13133~HELLP syndrome	5	5/1591	21/7517	0.467314	0.666942	1.12493			DO
1144	DOID:2316~brain ischemia	5	5/1591	21/7517	0.467314	0.666942	1.12493			DO
1145	DOID:9252~amino acid metabolic disorder	5	5/1591	21/7517	0.467314	0.666942	1.12493			DO
1146	DOID:9835~refractive error	14	14/1591	63/7517	0.467819	0.666942	1.04993			DO
1147	DOID:48~male reproductive system disease	28	28/1591	129/7517	0.474896	0.675876	1.02552			DO
1148	DOID:3275~thymoma	6	6/1591	26/7517	0.481798	0.679972	1.09032			DO
1149	DOID:11266~hemorrhagic fever with renal syndrome	3	3/1591	7517-12-01	0.482666	0.679972	1.18118			DO
1150	DOID:13544~low tension glaucoma	3	3/1591	7517-12-01	0.482666	0.679972	1.18118			DO
1151	DOID:1884~viral hepatitis	3	3/1591	7517-12-01	0.482666	0.679972	1.18118			DO
1152	DOID:3911~progeria	3	3/1591	7517-12-01	0.482666	0.679972	1.18118			DO
1153	DOID:4415~fibrous histiocytoma	3	3/1591	7517-12-01	0.482666	0.679972	1.18118			DO
1154	DOID:0080008~ischemic bone disease	10	10/1591	45/7517	0.48948	0.688409	1.04993			DO
1155	DOID:2583~agammaglobulinemia	7	7/1591	31/7517	0.493612	0.691887	1.06687			DO
1156	DOID:620~blood protein disease	7	7/1591	31/7517	0.493612	0.691887	1.06687			DO
1157	DOID:627~severe combined immunodeficiency	11	11/1591	50/7517	0.498115	0.694398	1.03943			DO
1158	DOID:0060033~autoimmune disease of peripheral nervous system	4	4/1591	17/7517	0.499567	0.694398	1.11169			DO
1159	DOID:10762~portal hypertension	4	4/1591	17/7517	0.499567	0.694398	1.11169			DO
1160	DOID:12842~Guillain-Barre syndrome	4	4/1591	17/7517	0.499567	0.694398	1.11169			DO
1161	DOID:699~mitochondrial myopathy	4	4/1591	17/7517	0.499567	0.694398	1.11169			DO
1162	DOID:607~paraplegia	5	5/1591	22/7517	0.511985	0.707493	1.0738			DO
1163	DOID:2021~placenta cancer	9	9/1591	41/7517	0.512381	0.707493	1.03713			DO
1164	DOID:3594~choriocarcinoma	9	9/1591	41/7517	0.512381	0.707493	1.03713			DO
1165	DOID:8432~polycythemia	9	9/1591	41/7517	0.512381	0.707493	1.03713			DO
1166	DOID:2490~congenital nervous system abnormality	10	10/1591	46/7517	0.520166	0.717055	1.02711			DO
1167	DOID:628~combined T cell and B cell immunodeficiency	11	11/1591	51/7517	0.527203	0.725557	1.01905			DO
1168	DOID:3277~thymus cancer	7	7/1591	32/7517	0.530365	0.728706	1.03353			DO
1169	DOID:3526~cerebral infarction	12	12/1591	56/7517	0.533644	0.732005	1.01244			DO
1170	DOID:326~ischemia	42	42/1591	199/7517	0.537022	0.732105	0.997173			DO
1171	DOID:1019~osteomyelitis	3	3/1591	13/7517	0.54074	0.732105	1.09032			DO
1172	DOID:13774~Addison's disease	3	3/1591	13/7517	0.54074	0.732105	1.09032			DO
1173	DOID:2526~prostate adenocarcinoma	3	3/1591	13/7517	0.54074	0.732105	1.09032			DO
1174	DOID:2913~acute pancreatitis	3	3/1591	13/7517	0.54074	0.732105	1.09032			DO
1175	DOID:321~tropical spastic paraparesis	3	3/1591	13/7517	0.54074	0.732105	1.09032			DO
1176	DOID:4330~non-langerhans-cell histiocytosis	3	3/1591	13/7517	0.54074	0.732105	1.09032			DO
1177	DOID:841~extrinsic allergic alveolitis	3	3/1591	13/7517	0.54074	0.732105	1.09032			DO
1178	DOID:0050700~cardiomyopathy	31	31/1591	147/7517	0.542318	0.733052	0.996366			DO
1179	DOID:0060036~intrinsic cardiomyopathy	28	28/1591	133/7517	0.547554	0.73663	0.994674			DO
1180	DOID:3095~germ cell and embryonal cancer	4	4/1591	18/7517	0.548498	0.73663	1.04993			DO
1181	DOID:9120~amyloidosis	4	4/1591	18/7517	0.548498	0.73663	1.04993			DO
1182	DOID:9428~intracranial hypertension	4	4/1591	18/7517	0.548498	0.73663	1.04993			DO
1183	DOID:10652~Alzheimer's disease	87	87/1591	414/7517	0.551223	0.7391	0.992872			DO
1184	DOID:1891~optic nerve disease	5	5/1591	23/7517	0.555031	0.74301	1.02711			DO
1185	DOID:8670~eating disorder	6	6/1591	28/7517	0.560798	0.749529	1.01244			DO
1186	DOID:10316~pneumoconiosis	7	7/1591	33/7517	0.566027	0.752897	1.00221			DO
1187	DOID:2115~B cell deficiency	7	7/1591	33/7517	0.566027	0.752897	1.00221			DO
1188	DOID:62~aortic valve disease	7	7/1591	33/7517	0.566027	0.752897	1.00221			DO
1189	DOID:4961~bone marrow disease	9	9/1591	43/7517	0.57534	0.764067	0.988891			DO
1190	DOID:9408~acute myocardial infarction	19	19/1591	92/7517	0.589609	0.774537	0.975754			DO
1191	DOID:680~tauopathy	87	87/1591	418/7517	0.592076	0.774537	0.983371			DO
1192	DOID:10113~trypanosomiasis	4	4/1591	19/7517	0.594789	0.774537	0.994674			DO
1193	DOID:2986~IgA glomerulonephritis	4	4/1591	19/7517	0.594789	0.774537	0.994674			DO
1194	DOID:8632~Kaposi's sarcoma	4	4/1591	19/7517	0.594789	0.774537	0.994674			DO
1195	DOID:121~vaginal disease	3	3/1591	14/7517	0.594848	0.774537	1.01244			DO
1196	DOID:12206~dengue hemorrhagic fever	3	3/1591	14/7517	0.594848	0.774537	1.01244			DO
1197	DOID:13001~carotid stenosis	3	3/1591	14/7517	0.594848	0.774537	1.01244			DO
1198	DOID:2170~vaginitis	3	3/1591	14/7517	0.594848	0.774537	1.01244			DO
1199	DOID:2226~chronic myeloproliferative disease	3	3/1591	14/7517	0.594848	0.774537	1.01244			DO
1200	DOID:2945~severe acute respiratory syndrome	3	3/1591	14/7517	0.594848	0.774537	1.01244			DO
1201	DOID:3385~bacterial vaginosis	3	3/1591	14/7517	0.594848	0.774537	1.01244			DO
1202	DOID:169~neuroendocrine tumor	5	5/1591	24/7517	0.59611	0.774537	0.984313			DO
1203	DOID:12177~common variable immunodeficiency	6	6/1591	29/7517	0.598083	0.774537	0.977524			DO
1204	DOID:1389~polyneuropathy	6	6/1591	29/7517	0.598083	0.774537	0.977524			DO
1205	DOID:9744~type 1 diabetes mellitus	6	6/1591	29/7517	0.598083	0.774537	0.977524			DO
1206	DOID:1116~pertussis	7	7/1591	35/7517	0.63328	0.814718	0.94494			DO
1207	DOID:1923~sex differentiation disease	7	7/1591	35/7517	0.63328	0.814718	0.94494			DO
1208	DOID:10907~microcephaly	6	6/1591	30/7517	0.6336	0.814718	0.94494			DO
1209	DOID:0002116~pterygium	5	5/1591	25/7517	0.634972	0.814718	0.94494			DO
1210	DOID:10139~conjunctival degeneration	5	5/1591	25/7517	0.634972	0.814718	0.94494			DO
1211	DOID:10526~conjunctival pterygium	5	5/1591	25/7517	0.634972	0.814718	0.94494			DO
1212	DOID:10575~calcium metabolism disease	4	4/1591	20/7517	0.638124	0.817505	0.94494			DO
1213	DOID:10493~adrenal cortical hypofunction	3	3/1591	15/7517	0.644615	0.822032	0.94494			DO
1214	DOID:11383~cryptorchidism	3	3/1591	15/7517	0.644615	0.822032	0.94494			DO
1215	DOID:11983~Prader-Willi syndrome	3	3/1591	15/7517	0.644615	0.822032	0.94494			DO
1216	DOID:0050598~extrapulmonary tuberculosis	2	2/1591	7517-10-01	0.65852	0.823397	0.94494			DO
1217	DOID:106~pleural tuberculosis	2	2/1591	7517-10-01	0.65852	0.823397	0.94494			DO
1218	DOID:10908~hydrocephalus	2	2/1591	7517-10-01	0.65852	0.823397	0.94494			DO
1219	DOID:1229~paranoid schizophrenia	2	2/1591	7517-10-01	0.65852	0.823397	0.94494			DO
1220	DOID:13949~interstitial cystitis	2	2/1591	7517-10-01	0.65852	0.823397	0.94494			DO
1221	DOID:1678~chronic interstitial cystitis	2	2/1591	7517-10-01	0.65852	0.823397	0.94494			DO
1222	DOID:3426~vestibular disease	2	2/1591	7517-10-01	0.65852	0.823397	0.94494			DO
1223	DOID:3614~Kallmann syndrome	2	2/1591	7517-10-01	0.65852	0.823397	0.94494			DO
1224	DOID:4015~spindle cell carcinoma	2	2/1591	7517-10-01	0.65852	0.823397	0.94494			DO
1225	DOID:693~dental enamel hypoplasia	2	2/1591	7517-10-01	0.65852	0.823397	0.94494			DO
1226	DOID:8584~Burkitt lymphoma	2	2/1591	7517-10-01	0.65852	0.823397	0.94494			DO
1227	DOID:9847~peripheral vertigo	2	2/1591	7517-10-01	0.65852	0.823397	0.94494			DO
1228	DOID:9848~endolymphatic hydrops	2	2/1591	7517-10-01	0.65852	0.823397	0.94494			DO
1229	DOID:0060262~gallbladder disease	7	7/1591	36/7517	0.664573	0.829722	0.918692			DO
1230	DOID:3211~lysosomal storage disease	29	29/1591	145/7517	0.667861	0.832069	0.94494			DO
1231	DOID:0050851~glomerulosclerosis	5	5/1591	26/7517	0.671442	0.832069	0.908596			DO
1232	DOID:1312~focal segmental glomerulosclerosis	5	5/1591	26/7517	0.671442	0.832069	0.908596			DO
1233	DOID:3978~extrinsic cardiomyopathy	5	5/1591	26/7517	0.671442	0.832069	0.908596			DO
1234	DOID:820~myocarditis	5	5/1591	26/7517	0.671442	0.832069	0.908596			DO
1235	DOID:0050032~mineral metabolism disease	4	4/1591	21/7517	0.678315	0.836856	0.899943			DO
1236	DOID:1921~Klinefelter's syndrome	4	4/1591	21/7517	0.678315	0.836856	0.899943			DO
1237	DOID:9743~diabetic neuropathy	4	4/1591	21/7517	0.678315	0.836856	0.899943			DO
1238	DOID:3454~brain infarction	12	12/1591	62/7517	0.68564	0.844644	0.914458			DO
1239	DOID:0050938~breast lobular carcinoma	3	3/1591	16/7517	0.689882	0.84612	0.885882			DO
1240	DOID:3319~lymphangioleiomyomatosis	3	3/1591	16/7517	0.689882	0.84612	0.885882			DO
1241	DOID:3457~invasive lobular carcinoma	3	3/1591	16/7517	0.689882	0.84612	0.885882			DO
1242	DOID:1441~spinocerebellar ataxia	7	7/1591	37/7517	0.694174	0.847645	0.893862			DO
1243	DOID:2478~spinocerebellar degeneration	7	7/1591	37/7517	0.694174	0.847645	0.893862			DO
1244	DOID:883~parasitic helminthiasis infectious disease	7	7/1591	37/7517	0.694174	0.847645	0.893862			DO
1245	DOID:12894~Sjogren's syndrome	13	13/1591	68/7517	0.706873	0.85957	0.903252			DO
1246	DOID:13593~eclampsia	2	2/1591	7517-11-01	0.71124	0.85957	0.859037			DO
1247	DOID:182~calcinosis	2	2/1591	7517-11-01	0.71124	0.85957	0.859037			DO
1248	DOID:3507~dermatofibrosarcoma protuberans	2	2/1591	7517-11-01	0.71124	0.85957	0.859037			DO
1249	DOID:7188~autoimmune thyroiditis	2	2/1591	7517-11-01	0.71124	0.85957	0.859037			DO
1250	DOID:2018~hyperinsulinism	10	10/1591	53/7517	0.711293	0.85957	0.891453			DO
1251	DOID:10579~leukodystrophy	9	9/1591	48/7517	0.713906	0.85957	0.885882			DO
1252	DOID:12858~Huntington's disease	9	9/1591	48/7517	0.713906	0.85957	0.885882			DO
1253	DOID:12377~spinal muscular atrophy	4	4/1591	22/7517	0.715277	0.85957	0.859037			DO
1254	DOID:14221~metabolic syndrome X	4	4/1591	22/7517	0.715277	0.85957	0.859037			DO
1255	DOID:3181~oligodendroglioma	4	4/1591	22/7517	0.715277	0.85957	0.859037			DO
1256	DOID:12336~male infertility	20	20/1591	104/7517	0.723226	0.867871	0.908596			DO
1257	DOID:1094~attention deficit hyperactivity disorder	6	6/1591	33/7517	0.728273	0.86889	0.859037			DO
1258	DOID:11722~myotonic dystrophy type 1	3	3/1591	17/7517	0.730664	0.86889	0.833771			DO
1259	DOID:1508~candidiasis	3	3/1591	17/7517	0.730664	0.86889	0.833771			DO
1260	DOID:1969~cerebral palsy	3	3/1591	17/7517	0.730664	0.86889	0.833771			DO
1261	DOID:47~prostate disease	3	3/1591	17/7517	0.730664	0.86889	0.833771			DO
1262	DOID:9477~pulmonary embolism	3	3/1591	17/7517	0.730664	0.86889	0.833771			DO
1263	DOID:11714~gestational diabetes	11	11/1591	59/7517	0.731368	0.86889	0.880877			DO
1264	DOID:8469~influenza	21	21/1591	110/7517	0.739293	0.877056	0.901988			DO
1265	DOID:12449~aplastic anemia	13	13/1591	70/7517	0.74704	0.882937	0.877445			DO
1266	DOID:11830~myopia	7	7/1591	39/7517	0.748088	0.882937	0.848023			DO
1267	DOID:11981~morbid obesity	6	6/1591	34/7517	0.755676	0.882937	0.833771			DO
1268	DOID:936~brain disease	88	88/1591	441/7517	0.756899	0.882937	0.942798			DO
1269	DOID:14499~Fabry disease	2	2/1591	7517-12-01	0.756955	0.882937	0.78745			DO
1270	DOID:14504~Niemann-Pick disease	2	2/1591	7517-12-01	0.756955	0.882937	0.78745			DO
1271	DOID:1574~alcohol abuse	2	2/1591	7517-12-01	0.756955	0.882937	0.78745			DO
1272	DOID:224~transient cerebral ischemia	2	2/1591	7517-12-01	0.756955	0.882937	0.78745			DO
1273	DOID:3429~inclusion body myositis	2	2/1591	7517-12-01	0.756955	0.882937	0.78745			DO
1274	DOID:5688~Werner syndrome	2	2/1591	7517-12-01	0.756955	0.882937	0.78745			DO
1275	DOID:678~progressive supranuclear palsy	2	2/1591	7517-12-01	0.756955	0.882937	0.78745			DO
1276	DOID:9562~primary ciliary dyskinesia	2	2/1591	7517-12-01	0.756955	0.882937	0.78745			DO
1277	DOID:767~muscular atrophy	8	8/1591	45/7517	0.765583	0.886726	0.839947			DO
1278	DOID:0050701~electroclinical syndrome	5	5/1591	29/7517	0.765767	0.886726	0.814604			DO
1279	DOID:0050735~X-linked disease	5	5/1591	29/7517	0.765767	0.886726	0.814604			DO
1280	DOID:12140~Chagas disease	3	3/1591	18/7517	0.767097	0.886726	0.78745			DO
1281	DOID:1852~intrahepatic cholestasis	3	3/1591	18/7517	0.767097	0.886726	0.78745			DO
1282	DOID:302~substance abuse	3	3/1591	18/7517	0.767097	0.886726	0.78745			DO
1283	DOID:0080014~chromosomal disease	24	24/1591	127/7517	0.767645	0.886726	0.892857			DO
1284	DOID:1682~congenital heart disease	10	10/1591	56/7517	0.776201	0.894335	0.843697			DO
1285	DOID:1681~heart septal defect	4	4/1591	24/7517	0.779594	0.894335	0.78745			DO
1286	DOID:272~hepatic vascular disease	4	4/1591	24/7517	0.779594	0.894335	0.78745			DO
1287	DOID:3907~lung squamous cell carcinoma	4	4/1591	24/7517	0.779594	0.894335	0.78745			DO
1288	DOID:5113~nutritional deficiency disease	4	4/1591	24/7517	0.779594	0.894335	0.78745			DO
1289	DOID:574~peripheral nervous system disease	13	13/1591	72/7517	0.783384	0.897313	0.853071			DO
1290	DOID:11984~hypertrophic cardiomyopathy	11	11/1591	62/7517	0.790679	0.897313	0.838253			DO
1291	DOID:12306~vitiligo	11	11/1591	62/7517	0.790679	0.897313	0.838253			DO
1292	DOID:14250~Down syndrome	10	10/1591	57/7517	0.795348	0.897313	0.828895			DO
1293	DOID:12895~keratoconjunctivitis sicca	2	2/1591	13/7517	0.796267	0.897313	0.726877			DO
1294	DOID:3133~acute porphyria	2	2/1591	13/7517	0.796267	0.897313	0.726877			DO
1295	DOID:6132~bronchitis	2	2/1591	13/7517	0.796267	0.897313	0.726877			DO
1296	DOID:7319~axonal neuropathy	2	2/1591	13/7517	0.796267	0.897313	0.726877			DO
1297	DOID:9368~keratoconjunctivitis	2	2/1591	13/7517	0.796267	0.897313	0.726877			DO
1298	DOID:9667~placental abruption	2	2/1591	13/7517	0.796267	0.897313	0.726877			DO
1299	DOID:10930~borderline personality disorder	3	3/1591	19/7517	0.799405	0.897313	0.746005			DO
1300	DOID:12132~Wegener's granulomatosis	3	3/1591	19/7517	0.799405	0.897313	0.746005			DO
1301	DOID:3246~embryonal rhabdomyosarcoma	3	3/1591	19/7517	0.799405	0.897313	0.746005			DO
1302	DOID:3407~carotid artery disease	3	3/1591	19/7517	0.799405	0.897313	0.746005			DO
1303	DOID:4990~essential tremor	3	3/1591	19/7517	0.799405	0.897313	0.746005			DO
1304	DOID:9007~sudden infant death syndrome	3	3/1591	19/7517	0.799405	0.897313	0.746005			DO
1305	DOID:10588~adrenoleukodystrophy	4	4/1591	25/7517	0.807141	0.903565	0.755952			DO
1306	DOID:11613~hyperandrogenism	4	4/1591	25/7517	0.807141	0.903565	0.755952			DO
1307	DOID:3324~mood disorder	35	35/1591	187/7517	0.820816	0.916424	0.884302			DO
1308	DOID:12217~Lewy body dementia	6	6/1591	37/7517	0.825597	0.916424	0.766168			DO
1309	DOID:1510~personality disorder	3	3/1591	20/7517	0.827866	0.916424	0.708705			DO
1310	DOID:1532~pleural disease	3	3/1591	20/7517	0.827866	0.916424	0.708705			DO
1311	DOID:450~myotonic disease	3	3/1591	20/7517	0.827866	0.916424	0.708705			DO
1312	DOID:10140~dry eye syndrome	2	2/1591	14/7517	0.829836	0.916424	0.674957			DO
1313	DOID:11247~disseminated intravascular coagulation	2	2/1591	14/7517	0.829836	0.916424	0.674957			DO
1314	DOID:13268~porphyria	2	2/1591	14/7517	0.829836	0.916424	0.674957			DO
1315	DOID:1400~lacrimal apparatus disease	2	2/1591	14/7517	0.829836	0.916424	0.674957			DO
1316	DOID:9563~bronchiectasis	2	2/1591	14/7517	0.829836	0.916424	0.674957			DO
1317	DOID:2214~inherited blood coagulation disease	4	4/1591	26/7517	0.831814	0.916424	0.726877			DO
1318	DOID:2352~hemochromatosis	4	4/1591	26/7517	0.831814	0.916424	0.726877			DO
1319	DOID:1443~cerebral degeneration	11	11/1591	65/7517	0.83991	0.924123	0.799565			DO
1320	DOID:11724~limb-girdle muscular dystrophy	3	3/1591	21/7517	0.852792	0.933245	0.674957			DO
1321	DOID:700~mitochondrial metabolism disease	3	3/1591	21/7517	0.852792	0.933245	0.674957			DO
1322	DOID:3612~retinitis	14	14/1591	82/7517	0.853566	0.933245	0.806656			DO
1323	DOID:10159~osteonecrosis	4	4/1591	27/7517	0.853796	0.933245	0.699956			DO
1324	DOID:2978~carbohydrate metabolic disorder	4	4/1591	27/7517	0.853796	0.933245	0.699956			DO
1325	DOID:1927~sphingolipidosis	5	5/1591	33/7517	0.857586	0.93331	0.715864			DO
1326	DOID:11202~primary hyperparathyroidism	2	2/1591	15/7517	0.858332	0.93331	0.62996			DO
1327	DOID:2769~tic disorder	2	2/1591	15/7517	0.858332	0.93331	0.62996			DO
1328	DOID:4851~pilocytic astrocytoma	2	2/1591	15/7517	0.858332	0.93331	0.62996			DO
1329	DOID:1826~epilepsy syndrome	36	36/1591	197/7517	0.864112	0.938372	0.863397			DO
1330	DOID:10211~cholelithiasis	4	4/1591	28/7517	0.873286	0.944737	0.674957			DO
1331	DOID:10933~obsessive-compulsive disorder	3	3/1591	22/7517	0.874504	0.944737	0.644277			DO
1332	DOID:13089~intracranial arterial disease	3	3/1591	22/7517	0.874504	0.944737	0.644277			DO
1333	DOID:3527~cerebral arterial disease	3	3/1591	22/7517	0.874504	0.944737	0.644277			DO
1334	DOID:1555~urticaria	6	6/1591	40/7517	0.878571	0.946663	0.708705			DO
1335	DOID:3298~vaccinia	6	6/1591	40/7517	0.878571	0.946663	0.708705			DO
1336	DOID:2277~gonadal disease	11	11/1591	68/7517	0.879693	0.946663	0.76429			DO
1337	DOID:11870~Pick's disease	2	2/1591	16/7517	0.882396	0.947128	0.590588			DO
1338	DOID:9637~stomatitis	2	2/1591	16/7517	0.882396	0.947128	0.590588			DO
1339	DOID:543~dystonia	6	6/1591	41/7517	0.892918	0.9564	0.69142			DO
1340	DOID:10892~hypospadias	3	3/1591	23/7517	0.893328	0.9564	0.616265			DO
1341	DOID:10941~intracranial aneurysm	2	2/1591	17/7517	0.902627	0.958377	0.555847			DO
1342	DOID:1882~atrial heart septal defect	2	2/1591	17/7517	0.902627	0.958377	0.555847			DO
1343	DOID:2055~post-traumatic stress disorder	2	2/1591	17/7517	0.902627	0.958377	0.555847			DO
1344	DOID:3490~Noonan syndrome	2	2/1591	17/7517	0.902627	0.958377	0.555847			DO
1345	DOID:11504~autonomic neuropathy	1	1/1591	7517-10-01	0.90743	0.958377	0.47247			DO
1346	DOID:13636~Fanconi's anemia	1	1/1591	7517-10-01	0.90743	0.958377	0.47247			DO
1347	DOID:13938~amenorrhea	1	1/1591	7517-10-01	0.90743	0.958377	0.47247			DO
1348	DOID:1586~rheumatic fever	1	1/1591	7517-10-01	0.90743	0.958377	0.47247			DO
1349	DOID:2113~coccidiosis	1	1/1591	7517-10-01	0.90743	0.958377	0.47247			DO
1350	DOID:2444~hyperpituitarism	1	1/1591	7517-10-01	0.90743	0.958377	0.47247			DO
1351	DOID:3328~temporal lobe epilepsy	7	7/1591	48/7517	0.907815	0.958377	0.689019			DO
1352	DOID:13515~tuberous sclerosis	3	3/1591	24/7517	0.909576	0.959022	0.590588			DO
1353	DOID:1924~hypogonadism	5	5/1591	37/7517	0.917188	0.965827	0.638473			DO
1354	DOID:0060041~autism spectrum disorder	32	32/1591	185/7517	0.921218	0.966247	0.817246			DO
1355	DOID:12849~autistic disorder	32	32/1591	185/7517	0.921218	0.966247	0.817246			DO
1356	DOID:13810~familial hypercholesterolemia	3	3/1591	25/7517	0.923544	0.966247	0.566964			DO
1357	DOID:2030~anxiety disorder	10	10/1591	67/7517	0.925239	0.966247	0.705179			DO
1358	DOID:0060038~specific developmental disorder	37	37/1591	212/7517	0.925898	0.966247	0.824594			DO
1359	DOID:10273~heart conduction disease	1	1/1591	7517-11-01	0.927049	0.966247	0.429518			DO
1360	DOID:12120~pulmonary alveolar proteinosis	1	1/1591	7517-11-01	0.927049	0.966247	0.429518			DO
1361	DOID:7757~childhood leukemia	1	1/1591	7517-11-01	0.927049	0.966247	0.429518			DO
1362	DOID:1059~intellectual disability	24	24/1591	144/7517	0.928014	0.966247	0.78745			DO
1363	DOID:2952~inner ear disease	9	9/1591	62/7517	0.931092	0.967037	0.685844			DO
1364	DOID:643~progressive multifocal leukoencephalopathy	9	9/1591	62/7517	0.931092	0.967037	0.685844			DO
1365	DOID:53~pituitary gland disease	2	2/1591	19/7517	0.933705	0.968048	0.497337			DO
1366	DOID:9415~allergic asthma	7	7/1591	51/7517	0.93673	0.968048	0.648488			DO
1367	DOID:896~metal metabolism disorder	5	5/1591	39/7517	0.937753	0.968048	0.605731			DO
1368	DOID:0060037~developmental disorder of mental health	65	65/1591	360/7517	0.941105	0.968048	0.853071			DO
1369	DOID:0050815~eye adnexa disease	1	1/1591	7517-12-01	0.942512	0.968048	0.393725			DO
1370	DOID:0060082~breast benign neoplasm	1	1/1591	7517-12-01	0.942512	0.968048	0.393725			DO
1371	DOID:0060097~thoracic benign neoplasm	1	1/1591	7517-12-01	0.942512	0.968048	0.393725			DO
1372	DOID:1003~pelvic inflammatory disease	1	1/1591	7517-12-01	0.942512	0.968048	0.393725			DO
1373	DOID:14018~alcoholic liver cirrhosis	1	1/1591	7517-12-01	0.942512	0.968048	0.393725			DO
1374	DOID:1920~hyperuricemia	2	2/1591	20/7517	0.945465	0.968695	0.47247			DO
1375	DOID:3308~embryonal carcinoma	2	2/1591	20/7517	0.945465	0.968695	0.47247			DO
1376	DOID:3312~bipolar disorder	25	25/1591	154/7517	0.950322	0.972476	0.766997			DO
1377	DOID:6419~tetralogy of Fallot	1	1/1591	13/7517	0.954699	0.975758	0.363439			DO
1378	DOID:480~movement disease	10	10/1591	72/7517	0.957785	0.977714	0.656209			DO
1379	DOID:1459~hypothyroidism	5	5/1591	42/7517	0.96007	0.978381	0.562464			DO
1380	DOID:0060040~pervasive developmental disorder	32	32/1591	195/7517	0.961935	0.978381	0.775336			DO
1381	DOID:11119~Gilles de la Tourette syndrome	1	1/1591	14/7517	0.964303	0.978381	0.337479			DO
1382	DOID:11465~autonomic nervous system disease	1	1/1591	14/7517	0.964303	0.978381	0.337479			DO
1383	DOID:12798~mucopolysaccharidosis	1	1/1591	14/7517	0.964303	0.978381	0.337479			DO
1384	DOID:10584~retinitis pigmentosa	10	10/1591	75/7517	0.970602	0.981286	0.62996			DO
1385	DOID:12129~bulimia nervosa	1	1/1591	15/7517	0.971873	0.981286	0.31498			DO
1386	DOID:1395~schistosomiasis	1	1/1591	15/7517	0.971873	0.981286	0.31498			DO
1387	DOID:589~congenital hemolytic anemia	1	1/1591	15/7517	0.971873	0.981286	0.31498			DO
1388	DOID:2234~focal epilepsy	7	7/1591	58/7517	0.975378	0.983634	0.570223			DO
1389	DOID:1342~congenital hypoplastic anemia	1	1/1591	19/7517	0.989162	0.996329	0.248668			DO
1390	DOID:14791~Leber congenital amaurosis	1	1/1591	20/7517	0.991461	0.997441	0.236235			DO
1391	DOID:10003~sensorineural hearing loss	4	4/1591	47/7517	0.99444	0.998338	0.402102			DO
1392	DOID:594~panic disorder	2	2/1591	34/7517	0.996928	0.998338	0.277924			DO
1393	DOID:230~lateral sclerosis	12	12/1591	109/7517	0.998292	0.998338	0.520151			DO
1394	DOID:231~motor neuron disease	24	24/1591	183/7517	0.998328	0.998338	0.619633			DO
1395	DOID:332~amyotrophic lateral sclerosis	19	19/1591	153/7517	0.998338	0.998338	0.586728			DO

## Sheet: READ
	Terms	Counts	GeneRatio	BgRatio	pValue	FDR	foldEnrichment	geneID	geneSymbol	Category
1	GO:0030198~extracellular matrix organization	110	110/2709	365/18012	1.1267e-13	7.02382e-10	2.00379	ENSG00000154175/ENSG00000046653/ENSG00000168477/ENSG00000154721/ENSG00000143196/ENSG00000145681/ENSG00000101680/ENSG00000271447/ENSG00000120708/ENSG00000197614/ENSG00000125398/ENSG00000122707/ENSG00000138685/ENSG00000137273/ENSG00000133710/ENSG00000099866/ENSG00000157766/ENSG00000166086/ENSG00000111863/ENSG00000162733/ENSG00000133392/ENSG00000135424/ENSG00000144824/ENSG00000106397/ENSG00000102265…	ABI3BP/GPM6B/TNXB/JAM2/DPT/HAPLN1/LAMA1/MMP28/TGFBI/MFAP5/SOX9/RECK/FGF2/FOXF2/SPINK5/MADCAM1/ACAN/JAM3/ADTRP/DDR2/MYH11/ITGA7/PHLDB2/PLOD3/TIMP1/ITGA8/ADAMTSL4/COL28A1/EGFL6/NDNF/LOXL4/COL14A1/FLRT2/CD44/ITGB3/MFAP4/CCDC80/FOXF1/COL4A5/MMP11/SERPINH1/NTN4/DCN/PDGFRA/ECM2/FERMT1/TPSAB1/FGFR4/CAPN2/COL7A1/CTSS/ICAM3/BGN/COL1A1/OLFML2A/AGT/LOXL2/CYP1B1/AGRN/COL11A1/MMP7/COL10A1/FBLN5/ERO1B/COL27A1/…	GO_BP
2	GO:0050900~leukocyte migration	122	122/2709	433/18012	9.8775e-13	3.07882e-09	1.87338	ENSG00000105894/ENSG00000154721/ENSG00000160712/ENSG00000107562/ENSG00000271447/ENSG00000119919/ENSG00000113448/ENSG00000100604/ENSG00000171951/ENSG00000105974/ENSG00000204936/ENSG00000170962/ENSG00000172724/ENSG00000172349/ENSG00000103257/ENSG00000117091/ENSG00000136732/ENSG00000112715/ENSG00000105851/ENSG00000124205/ENSG00000112175/ENSG00000156234/ENSG00000145147/ENSG00000169508/ENSG00000099866…	PTN/JAM2/IL6R/CXCL12/MMP28/NKX2-3/PDE4D/CHGA/SCG2/CAV1/CD177/PDGFD/CCL19/IL16/SLC7A5/CD48/GYPC/VEGFA/PIK3CG/EDN3/BMP5/CXCL13/SLIT2/GPR183/MADCAM1/THBS4/JAM3/ADTRP/SLC3A2/KITLG/ANGPT1/PADI2/KIT/CCR2/GCSAM/CCL21/TEK/PTGER4/F2RL1/JAML/CCL15/LYST/SLC7A6/NOV/RIPOR2/MCOLN2/CD44/PLCG1/BDKRB1/WASL/ITGB3/EDNRB/CCL28/GRB7/NCKAP1L/RET/CCR7/JCHAIN/ROR2/S1PR1/PODXL2/AIF1/RARRES2/PTK2B/ZP3/CMKLR1/L1CAM/COL1A1/…	GO_BP
3	GO:0031589~cell-substrate adhesion	98	98/2709	348/18012	1.76792e-10	2.7553e-07	1.8724	ENSG00000133800/ENSG00000168309/ENSG00000111846/ENSG00000104332/ENSG00000154175/ENSG00000046653/ENSG00000105894/ENSG00000138722/ENSG00000112276/ENSG00000135218/ENSG00000171791/ENSG00000164176/ENSG00000127990/ENSG00000070759/ENSG00000129474/ENSG00000112715/ENSG00000156299/ENSG00000044524/ENSG00000072163/ENSG00000166333/ENSG00000099866/ENSG00000166086/ENSG00000184349/ENSG00000162733/ENSG00000135424…	LYVE1/FAM107A/GCNT2/SFRP1/ABI3BP/GPM6B/PTN/MMRN1/BVES/CD36/BCL2/EDIL3/SGCE/TESK2/AJUBA/VEGFA/TIAM1/EPHA3/LIMS2/ILK/MADCAM1/JAM3/EFNA5/DDR2/ITGA7/ANGPT1/PHLDB2/PARVA/FERMT2/SORBS1/TNFRSF12A/CCL21/ITGA8/TEK/VCL/EGFL6/NDNF/VWA2/FZD4/CD44/ITGB3/CCDC80/FOXF1/CCL28/CCR7/NTN4/SIGLEC1/FLNA/ACVRL1/EPHA1/CD96/ECM2/FERMT1/RELL2/ARHGAP6/HPSE/PTK2B/PLAU/L1CAM/COL1A1/BST1/DLC1/AXL/FER/ADAMTS12/MYADM/FBLN5/ITGB…	GO_BP
4	GO:0003012~muscle system process	116	116/2709	451/18012	1.6709e-09	1.52182e-06	1.71015	ENSG00000101605/ENSG00000087258/ENSG00000145362/ENSG00000075073/ENSG00000141052/ENSG00000198523/ENSG00000169860/ENSG00000151320/ENSG00000156113/ENSG00000138735/ENSG00000113448/ENSG00000177098/ENSG00000182253/ENSG00000004776/ENSG00000006704/ENSG00000100604/ENSG00000163681/ENSG00000153956/ENSG00000077157/ENSG00000163431/ENSG00000138193/ENSG00000105974/ENSG00000213366/ENSG00000123096/ENSG00000198771…	MYOM1/GNAO1/ANK2/TACR2/MYOCD/PLN/P2RY1/AKAP6/KCNMA1/PDE5A/PDE4D/SCN4B/SYNM/HSPB6/GTF2IRD1/CHGA/SLMAP/CACNA2D1/PPP1R12B/LMOD1/PLCE1/CAV1/GSTM2/SSPN/RCSD1/CALM1/MYLK/RGS2/SLC8A1/GPER1/CRYAB/TPM1/DMD/MEF2C/CLIC2/SORBS2/PIK3CG/ATP2B4/EDN3/TIAM1/IL6ST/GSN/PDE9A/CNN1/NEDD4L/DTNA/GPD1L/PRKG1/CAMK2G/MYH11/KLF4/PPARGC1A/P2RX1/MYL9/SORBS1/CACNB2/ARHGAP42/KIT/CAMK2D/ACTG2/DSC2/TMOD2/EZH2/OXTR/SMTN/VCL/TPM2/…	GO_BP
5	GO:0030098~lymphocyte differentiation	96	96/2709	352/18012	1.73262e-09	1.52182e-06	1.81335	ENSG00000104332/ENSG00000078596/ENSG00000127951/ENSG00000154822/ENSG00000119919/ENSG00000171791/ENSG00000048052/ENSG00000108773/ENSG00000152495/ENSG00000007312/ENSG00000172724/ENSG00000124766/ENSG00000106571/ENSG00000158473/ENSG00000081059/ENSG00000133710/ENSG00000198846/ENSG00000105369/ENSG00000116678/ENSG00000137265/ENSG00000169508/ENSG00000148516/ENSG00000159216/ENSG00000197943/ENSG00000139193…	SFRP1/ITM2A/FGL2/PLCL2/NKX2-3/BCL2/HDAC9/KAT2A/CAMK4/CD79B/CCL19/SOX4/GLI3/CD1D/TCF7/SPINK5/TOX/CD79A/LEPR/IRF4/GPR183/ZEB1/RUNX1/PLCG2/CD27/BTK/ITPKB/DOCK10/POLM/RIPK2/KIT/CCR2/PTGER4/IKZF1/POU2F2/FCGR2B/TCF3/HHEX/MIR17HG/VSIR/KLF6/ZC3H8/FANCA/CBFB/NCKAP1L/CCR7/DOCK2/INHBA/HMGB3/JAG2/RSAD2/CMTM7/ID2/HNF1A/PTK2B/PTPRC/CHD7/RORA/RHOH/IL11/AXL/PRKDC/VAV1/CYP26B1/PIK3CD/SHH/IL23A/PRR7/IKZF3/HLA-DOA/…	GO_BP
6	GO:0042110~T cell activation	118	118/2709	462/18012	1.89146e-09	1.52182e-06	1.69822	ENSG00000160712/ENSG00000127951/ENSG00000119919/ENSG00000138735/ENSG00000171791/ENSG00000108773/ENSG00000105974/ENSG00000152495/ENSG00000069974/ENSG00000172724/ENSG00000124766/ENSG00000106571/ENSG00000158473/ENSG00000081059/ENSG00000105851/ENSG00000133710/ENSG00000116678/ENSG00000137265/ENSG00000169508/ENSG00000134352/ENSG00000148180/ENSG00000170677/ENSG00000148516/ENSG00000159216/ENSG00000076641…	IL6R/FGL2/NKX2-3/PDE5A/BCL2/KAT2A/CAV1/CAMK4/RAB27A/CCL19/SOX4/GLI3/CD1D/TCF7/PIK3CG/SPINK5/LEPR/IRF4/GPR183/IL6ST/GSN/SOCS6/ZEB1/RUNX1/PAG1/CD27/CD209/ITPKB/RIPK2/HHLA2/KIT/CCR2/CCL21/PTGER4/FCGR2B/F2RL1/JAML/BCL10/RIPOR2/LGALS9C/HSPH1/CD44/TNFRSF13C/VSIR/CEBPB/ZC3H8/FANCA/CBFB/NCKAP1L/CCR7/LGALS9B/DOCK2/HSPD1/AIF1/JAG2/RSAD2/APBB1IP/VSIG4/PRNP/ZP3/LGALS3/PTPRC/FKBP1B/P2RX7/CHD7/RORA/RHOH/LAX1/P…	GO_BP
7	GO:0019932~second-messenger-mediated signaling	113	113/2709	437/18012	1.95293e-09	1.52182e-06	1.71929	ENSG00000186642/ENSG00000145362/ENSG00000005249/ENSG00000198523/ENSG00000186469/ENSG00000198121/ENSG00000173175/ENSG00000135218/ENSG00000151320/ENSG00000150471/ENSG00000138735/ENSG00000113448/ENSG00000149596/ENSG00000172348/ENSG00000100604/ENSG00000138193/ENSG00000125398/ENSG00000213366/ENSG00000012124/ENSG00000198668/ENSG00000068383/ENSG00000116741/ENSG00000183023/ENSG00000164850/ENSG00000078295…	PDE2A/ANK2/PRKAR2B/PLN/GNG2/LPAR1/ADCY5/CD36/AKAP6/ADGRL3/PDE5A/PDE4D/JPH2/RCAN2/CHGA/PLCE1/SOX9/GSTM2/CD22/CALM1/INPP5A/RGS2/SLC8A1/GPER1/ADCY2/ADGRG1/NR5A2/LRRK2/DMD/VEGFA/CLIC2/ITPR1/ATP2B4/EDN3/VIP/NPR1/GNA13/MT2A/PDE9A/RCAN1/PRKG1/PDE3A/PLCG2/GNAI1/RASD2/BTK/GRIN2D/CHP2/ADGRL2/CCR2/CAMK2D/PTGER4/APLP1/PTGDR2/LGR4/NDNF/GUCY1A3/PDX1/ADCY9/GNAL/PLCG1/GNAQ/DMPK/PTGER3/EDNRB/SRI/MYO5A/CCR7/ADGRD1…	GO_BP
8	GO:0035690~cellular response to drug	97	97/2709	360/18012	2.83876e-09	1.76968e-06	1.79152	ENSG00000104332/ENSG00000186642/ENSG00000145936/ENSG00000173175/ENSG00000169860/ENSG00000113580/ENSG00000141570/ENSG00000116473/ENSG00000167641/ENSG00000125398/ENSG00000213366/ENSG00000090447/ENSG00000170962/ENSG00000183023/ENSG00000163516/ENSG00000078295/ENSG00000183010/ENSG00000162409/ENSG00000119138/ENSG00000156804/ENSG00000188906/ENSG00000084774/ENSG00000081189/ENSG00000058668/ENSG00000165457…	SFRP1/PDE2A/KCNMB1/ADCY5/P2RY1/NR3C1/CBX8/RAP1A/PPP1R14A/SOX9/GSTM2/TFAP4/PDGFD/SLC8A1/ANKZF1/ADCY2/PYCR1/PRKAA2/KLF9/FBXO32/LRRK2/CAD/MEF2C/ATP2B4/FOLR2/TLR3/SLIT2/MT2A/EFNA5/MYC/PINK1/GNAI1/KLF4/PPARGC1A/HSP90AB1/RIPK2/RGS10/TP53INP1/MET/NCOA1/NME1/EZH2/TRAP1/DPEP1/TRPC6/PPP1R12A/GNAQ/PPAT/PRKN/DDX11/SIGMAR1/TRAF2/SRD5A1/LDOC1/GNA11/CDK4/AIF1/CD69/PCK1/ADCY3/MAP4K1/PRNP/ECT2/FOXO1/P2RX7/DNMT3B/…	GO_BP
9	GO:0022407~regulation of cell-cell adhesion	104	104/2709	398/18012	4.69514e-09	2.66087e-06	1.73741	ENSG00000111846/ENSG00000160712/ENSG00000107562/ENSG00000127951/ENSG00000138735/ENSG00000164442/ENSG00000105974/ENSG00000172724/ENSG00000106571/ENSG00000158473/ENSG00000112715/ENSG00000156234/ENSG00000134352/ENSG00000170677/ENSG00000162407/ENSG00000111863/ENSG00000159216/ENSG00000151150/ENSG00000185532/ENSG00000184349/ENSG00000125845/ENSG00000136826/ENSG00000076641/ENSG00000139193/ENSG00000090659…	GCNT2/IL6R/CXCL12/FGL2/PDE5A/CITED2/CAV1/CCL19/GLI3/CD1D/VEGFA/CXCL13/IL6ST/SOCS6/PLPP3/ADTRP/RUNX1/ANK3/PRKG1/EFNA5/BMP2/KLF4/PAG1/CD27/CD209/ITPKB/FXYD5/RIPK2/HHLA2/CCR2/CCL21/FCGR2B/BMP6/BCL10/IRAK1/RIPOR2/LGALS9C/HSPH1/CD44/TNFRSF13C/VSIR/CCL28/CEBPB/ZC3H8/ZNF703/CBFB/NCKAP1L/CCR7/LGALS9B/HSPD1/AIF1/VSIG4/PRNP/ZP3/LGALS3/PTPRC/LAX1/NR4A3/VAV1/SHH/TENM3/IL23A/RDX/MDGA1/MYADM/LEF1/ITGA4/CD28/HL…	GO_BP
10	GO:0051249~regulation of lymphocyte activation	107	107/2709	415/18012	6.212e-09	3.22713e-06	1.71431	ENSG00000104332/ENSG00000160712/ENSG00000127951/ENSG00000138735/ENSG00000171791/ENSG00000108773/ENSG00000105974/ENSG00000152495/ENSG00000012124/ENSG00000172724/ENSG00000106571/ENSG00000158473/ENSG00000081189/ENSG00000133710/ENSG00000198846/ENSG00000137265/ENSG00000169508/ENSG00000134352/ENSG00000148180/ENSG00000170677/ENSG00000148516/ENSG00000159216/ENSG00000196950/ENSG00000076641/ENSG00000139193…	SFRP1/IL6R/FGL2/PDE5A/BCL2/KAT2A/CAV1/CAMK4/CD22/CCL19/GLI3/CD1D/MEF2C/SPINK5/TOX/IRF4/GPR183/IL6ST/GSN/SOCS6/ZEB1/RUNX1/SLC39A10/PAG1/CD27/BTK/CD209/ITPKB/RIPK2/HHLA2/CCR2/CCL21/FCGR2B/BCL10/MZB1/RIPOR2/LGALS9C/HSPH1/TNFRSF13C/MIR17HG/BANK1/VSIR/CEBPB/ZC3H8/FANCA/CBFB/NCKAP1L/CCR7/LGALS9B/HSPD1/INHBA/HMGB3/AIF1/VSIG4/ID2/PRNP/ZP3/IGLL5/LGALS3/PTPRC/BST1/TNFSF13/AXL/SAMSN1/LAX1/VAV1/CYP26B1/SHH/I…	GO_BP
11	GO:0002685~regulation of leukocyte migration	60	60/2709	192/18012	9.70267e-09	4.65281e-06	2.0778	ENSG00000105894/ENSG00000160712/ENSG00000107562/ENSG00000271447/ENSG00000170962/ENSG00000172724/ENSG00000112715/ENSG00000124205/ENSG00000112175/ENSG00000156234/ENSG00000145147/ENSG00000099866/ENSG00000113296/ENSG00000166086/ENSG00000111863/ENSG00000049130/ENSG00000117115/ENSG00000121807/ENSG00000174500/ENSG00000137077/ENSG00000171522/ENSG00000164251/ENSG00000136999/ENSG00000111913/ENSG00000100739…	PTN/IL6R/CXCL12/MMP28/PDGFD/CCL19/VEGFA/EDN3/BMP5/CXCL13/SLIT2/MADCAM1/THBS4/JAM3/ADTRP/KITLG/PADI2/CCR2/GCSAM/CCL21/PTGER4/F2RL1/NOV/RIPOR2/BDKRB1/WASL/CCL28/NCKAP1L/CCR7/AIF1/RARRES2/PTK2B/ZP3/CMKLR1/LGALS3/BST1/MTUS1/MST1/IL23A/ITGA4/ITGA2/DOCK8/CCL5/HMOX1/DUSP1/PGF/SMPD3/IL1R1/TRPV4/MIF/MMP14/CCL20/CCL2/CXCL8/SELP/SERPINE1/CAMK1D/S100A14/C10orf99/WNT5A	GO_BP
12	GO:1901654~response to ketone	60	60/2709	193/18012	1.20405e-08	5.36148e-06	2.06703	ENSG00000104332/ENSG00000105894/ENSG00000198523/ENSG00000186469/ENSG00000173175/ENSG00000113580/ENSG00000184347/ENSG00000105974/ENSG00000090447/ENSG00000128573/ENSG00000172724/ENSG00000078295/ENSG00000162409/ENSG00000069535/ENSG00000119138/ENSG00000156804/ENSG00000163347/ENSG00000084774/ENSG00000145147/ENSG00000184349/ENSG00000127955/ENSG00000136826/ENSG00000151632/ENSG00000137077/ENSG00000171522…	SFRP1/PTN/PLN/GNG2/ADCY5/NR3C1/SLIT3/CAV1/TFAP4/FOXP2/CCL19/ADCY2/PRKAA2/MAOB/KLF9/FBXO32/CLDN1/CAD/SLIT2/EFNA5/GNAI1/KLF4/AKR1C2/CCL21/PTGER4/NCOA1/CCND1/NME1/OXTR/HOXD13/BCL2L1/TGFBR3/ATP2B1/CCR7/SRD5A1/PSPH/CDK4/PTGFR/PCK1/ADCY3/MAP4K1/TXNIP/FOXO1/DNMT3B/DDIT4/TH/FOSL1/FOSB/PTGER2/EIF4EBP1/DUSP1/CDKN1A/KLF2/AQP1/CD38/CYBB/KCNJ11/HOXB13/CA9/ABCC2	GO_BP
13	GO:0002250~adaptive immune response	104	104/2709	410/18012	2.52946e-08	1.05124e-05	1.68656	ENSG00000112936/ENSG00000166501/ENSG00000160712/ENSG00000127951/ENSG00000132514/ENSG00000105609/ENSG00000152495/ENSG00000069974/ENSG00000007312/ENSG00000172724/ENSG00000101695/ENSG00000158473/ENSG00000117091/ENSG00000081189/ENSG00000105851/ENSG00000105369/ENSG00000156234/ENSG00000137265/ENSG00000169508/ENSG00000134352/ENSG00000166086/ENSG00000165406/ENSG00000076641/ENSG00000113303/ENSG00000139193…	C7/PRKCB/IL6R/FGL2/CLEC10A/LILRB5/CAMK4/RAB27A/CD79B/CCL19/RNF125/CD1D/CD48/MEF2C/PIK3CG/CD79A/CXCL13/IRF4/GPR183/IL6ST/JAM3/MARCH8/PAG1/BTNL8/CD27/BTK/CD209/RIPK2/TRIM27/CCR2/CLU/POU2F2/FCGR2B/BCL10/KLHL6/MCOLN2/SLAMF7/C2/PVR/LIME1/TNFRSF13C/JCHAIN/HSPD1/TRAF2/RSAD2/EXO1/PTK2B/CTSS/ZP3/IGLL5/PTPRC/HLA-DOB/TNFSF13/P2RX7/RORA/SAMSN1/LAX1/GCNT3/PIK3CD/IL23A/TNFRSF11A/PRR7/WAS/HLA-DOA/SLA2/LEF1/CD28…	GO_BP
14	GO:0050920~regulation of chemotaxis	63	63/2709	212/18012	3.55592e-08	1.38548e-05	1.97587	ENSG00000105894/ENSG00000198121/ENSG00000160712/ENSG00000107562/ENSG00000271447/ENSG00000137872/ENSG00000171951/ENSG00000170962/ENSG00000138685/ENSG00000172724/ENSG00000172349/ENSG00000132003/ENSG00000112715/ENSG00000124205/ENSG00000156299/ENSG00000156234/ENSG00000149658/ENSG00000145147/ENSG00000169508/ENSG00000113296/ENSG00000166086/ENSG00000130449/ENSG00000092421/ENSG00000117115/ENSG00000010319…	PTN/LPAR1/IL6R/CXCL12/MMP28/SEMA6D/SCG2/PDGFD/FGF2/CCL19/IL16/ZSWIM4/VEGFA/EDN3/TIAM1/CXCL13/YTHDF1/SLIT2/GPR183/THBS4/JAM3/ZSWIM6/SEMA6A/PADI2/SEMA3G/CCR2/CCL21/MET/F2RL1/NOV/RIPOR2/NCKAP1L/CCR7/S1PR1/PDGFRA/WNT3/AIF1/RARRES2/PTK2B/CMKLR1/PLXNA3/FGFR1/BST1/FGF18/MTUS1/GSTP1/MST1/IL23A/ITGA2/ANGPT2/CCL5/DUSP1/PGF/TRPV4/MIF/SEMA5B/CCL2/CXCL8/SERPINE1/PLXNA4/CAMK1D/S100A14/WNT5A	GO_BP
15	GO:0032970~regulation of actin filament-based process	97	97/2709	380/18012	5.34553e-08	1.85134e-05	1.69723	ENSG00000168309/ENSG00000104332/ENSG00000046653/ENSG00000145362/ENSG00000165410/ENSG00000198523/ENSG00000198121/ENSG00000107562/ENSG00000150764/ENSG00000113448/ENSG00000163431/ENSG00000105974/ENSG00000172403/ENSG00000140416/ENSG00000081189/ENSG00000173898/ENSG00000044524/ENSG00000145147/ENSG00000166333/ENSG00000148180/ENSG00000166086/ENSG00000184349/ENSG00000144824/ENSG00000109265/ENSG00000133627…	FAM107A/SFRP1/GPM6B/ANK2/CFL2/PLN/LPAR1/CXCL12/DIXDC1/PDE4D/LMOD1/CAV1/SYNPO2/TPM1/MEF2C/SPTBN2/EPHA3/SLIT2/ILK/GSN/JAM3/EFNA5/PHLDB2/KIAA1211/ACTR3B/TRIM27/ARHGAP28/CCL21/MET/LIMK1/ARHGAP44/TEK/CAMK2D/PTGER4/DSC2/ASAP3/TMOD2/F2RL1/LIMA1/RHOJ/RHOU/SCIN/FGF13/WASL/PRKN/GRHL3/SRI/NCKAP1L/CCR7/S1PR1/FLNA/IQGAP2/C15orf62/EPHA1/PDGFRA/SYNPO/RHOF/ECT2/ARHGAP6/CDC42EP3/PTK2B/ARHGEF19/BST1/CCDC88A/DSTN/D…	GO_BP
16	GO:0061448~connective tissue development	74	74/2709	270/18012	9.95144e-08	3.10186e-05	1.8223	ENSG00000160712/ENSG00000120708/ENSG00000125398/ENSG00000170962/ENSG00000138685/ENSG00000106571/ENSG00000133104/ENSG00000081189/ENSG00000143816/ENSG00000112175/ENSG00000148516/ENSG00000157766/ENSG00000125845/ENSG00000109819/ENSG00000134245/ENSG00000168077/ENSG00000168646/ENSG00000102265/ENSG00000062282/ENSG00000075239/ENSG00000153162/ENSG00000043039/ENSG00000132561/ENSG00000165816/ENSG00000136999…	IL6R/TGFBI/SOX9/PDGFD/FGF2/GLI3/SPART/MEF2C/WNT9A/BMP5/ZEB1/ACAN/BMP2/PPARGC1A/WNT2B/SCARA3/AXIN2/TIMP1/DGAT2/ACAT1/BMP6/BARX2/MATN2/VWA2/NOV/SCIN/COL14A1/CD44/SERPINH1/SNAI1/MGP/ROR2/CDK4/MAF/ACVRL1/EFEMP1/FRZB/COL7A1/ID2/COL1A1/FGFR1/OXCT1/TRPS1/CHI3L1/FGF18/ADAMTS12/LOXL2/COL11A1/GPR4/COL27A1/MSX1/ACTA2/EVC/LRP5L/PITX1/SFRP2/WISP1/SMPD3/STC1/COMP/TRPV4/CRIP1/BMP4/HYAL3/WNT5B/FOXA1/CHADL/COL5A1…	GO_BP
17	GO:2000241~regulation of reproductive process	47	47/2709	146/18012	1.39467e-07	3.98362e-05	2.14041	ENSG00000104332/ENSG00000169860/ENSG00000138735/ENSG00000164442/ENSG00000125398/ENSG00000146469/ENSG00000145088/ENSG00000101224/ENSG00000169946/ENSG00000071539/ENSG00000172572/ENSG00000087586/ENSG00000102265/ENSG00000142875/ENSG00000116455/ENSG00000183134/ENSG00000180914/ENSG00000128714/ENSG00000196557/ENSG00000136160/ENSG00000124216/ENSG00000122641/ENSG00000145685/ENSG00000064102/ENSG00000188372…	SFRP1/P2RY1/PDE5A/CITED2/SOX9/VIP/EAF2/CDC25B/ZFPM2/TRIP13/PDE3A/AURKA/TIMP1/PRKACB/WDR77/PTGDR2/OXTR/HOXD13/CACNA1H/EDNRB/SNAI1/INHBA/LHFPL2/INTS13/ZP3/LIF/CDC25C/MAPK15/CDC20/SHH/TTK/PRDX4/MSX1/OVGP1/GPR3/ACVR1C/DUSP1/CDC25A/LFNG/ASPM/BMP4/HYAL3/PHLDA2/INHBB/NUPR1/WNT5A/MSX2	GO_BP
18	GO:2000106~regulation of leukocyte apoptotic process	32	32/2709	83/18012	1.40583e-07	3.98362e-05	2.56345	ENSG00000107562/ENSG00000172724/ENSG00000081189/ENSG00000171115/ENSG00000196950/ENSG00000049130/ENSG00000139193/ENSG00000010671/ENSG00000143772/ENSG00000137077/ENSG00000142867/ENSG00000215417/ENSG00000144161/ENSG00000126353/ENSG00000157514/ENSG00000131981/ENSG00000089041/ENSG00000167601/ENSG00000119508/ENSG00000171608/ENSG00000180353/ENSG00000151012/ENSG00000107099/ENSG00000178999/ENSG00000271503…	CXCL12/CCL19/MEF2C/GIMAP8/SLC39A10/KITLG/CD27/BTK/ITPKB/CCL21/BCL10/MIR17HG/ZC3H8/CCR7/TSC22D3/LGALS3/P2RX7/AXL/NR4A3/PIK3CD/HCLS1/SLC7A11/DOCK8/AURKB/CCL5/ARG2/NOD2/CD3G/MIF/BMP4/CDKN2A/WNT5A	GO_BP
19	GO:0071229~cellular response to acid chemical	60	60/2709	207/18012	1.96419e-07	5.102e-05	1.92723	ENSG00000104332/ENSG00000004799/ENSG00000145936/ENSG00000186469/ENSG00000125398/ENSG00000170962/ENSG00000107864/ENSG00000066468/ENSG00000162409/ENSG00000163347/ENSG00000112715/ENSG00000165457/ENSG00000143816/ENSG00000044524/ENSG00000187134/ENSG00000148516/ENSG00000105989/ENSG00000158828/ENSG00000136826/ENSG00000109819/ENSG00000182199/ENSG00000151632/ENSG00000062282/ENSG00000171522/ENSG00000062524…	SFRP1/PDK4/KCNMB1/GNG2/SOX9/PDGFD/CPEB3/FGFR2/PRKAA2/CLDN1/VEGFA/FOLR2/WNT9A/EPHA3/AKR1C1/ZEB1/WNT2/PINK1/KLF4/PPARGC1A/SHMT2/AKR1C2/DGAT2/PTGER4/LTK/E2F1/NME1/FZD4/BCL2L1/CPEB4/PID1/TESC/CEBPB/RET/CDK4/NSMF/PDGFRA/WNT3/PTGFR/PCK1/CAPN2/PTK2B/COL1A1/NEURL1/PTK7/CCNB1/CYP26B1/ABCA1/NTRK2/PTGER2/KLF2/COL4A1/AQP1/CYBB/WNT5B/FZD7/ALDH1A2/ZC3H12A/COL5A2/WNT5A	GO_BP
20	GO:0046677~response to antibiotic	83	83/2709	320/18012	2.33044e-07	5.81118e-05	1.72457	ENSG00000087258/ENSG00000145936/ENSG00000173175/ENSG00000181856/ENSG00000171791/ENSG00000141570/ENSG00000170962/ENSG00000116741/ENSG00000183023/ENSG00000109846/ENSG00000066468/ENSG00000163516/ENSG00000078295/ENSG00000183010/ENSG00000069535/ENSG00000163347/ENSG00000188906/ENSG00000081189/ENSG00000164120/ENSG00000131471/ENSG00000148180/ENSG00000184349/ENSG00000158828/ENSG00000127955/ENSG00000136826…	GNAO1/KCNMB1/ADCY5/SLC2A4/BCL2/CBX8/PDGFD/RGS2/SLC8A1/CRYAB/FGFR2/ANKZF1/ADCY2/PYCR1/MAOB/CLDN1/LRRK2/MEF2C/HPGD/AOC3/GSN/EFNA5/PINK1/GNAI1/KLF4/CD27/TP53INP1/MET/CLU/CCND1/HBB/EZH2/TRAP1/TRPC6/BCL2L1/PPP2CB/MB/DDX11/ZC3H8/SIGMAR1/GRIN2B/SRD5A1/ADH6/ADCY3/CAPN2/ECT2/PTK2B/COL1A1/TXNIP/FKBP1B/FOXO1/OXCT1/AXL/HBA2/TH/NR4A3/CYP1B1/GSTP1/FOSL1/CD14/PLA2G4A/GPR37L1/HMOX1/EIF4EBP1/DUSP1/VCAM1/CDK1/TRPA…	GO_BP
21	GO:0007204~positive regulation of cytosolic calcium ion concentration	82	82/2709	317/18012	3.10583e-07	7.44682e-05	1.71992	ENSG00000145362/ENSG00000198523/ENSG00000198121/ENSG00000173175/ENSG00000135218/ENSG00000169860/ENSG00000151320/ENSG00000113448/ENSG00000149596/ENSG00000171791/ENSG00000153956/ENSG00000138193/ENSG00000105974/ENSG00000173198/ENSG00000213366/ENSG00000198668/ENSG00000138685/ENSG00000172724/ENSG00000183023/ENSG00000164850/ENSG00000198947/ENSG00000155962/ENSG00000150995/ENSG00000105851/ENSG00000058668…	ANK2/PLN/LPAR1/ADCY5/CD36/P2RY1/AKAP6/PDE4D/JPH2/BCL2/CACNA2D1/PLCE1/CAV1/CYSLTR1/GSTM2/CALM1/FGF2/CCL19/SLC8A1/GPER1/DMD/CLIC2/ITPR1/PIK3CG/ATP2B4/CXCL13/GNA13/CEMIP/NPTN/PLCG2/P2RY8/GRIN2D/CACNB2/CCR2/CCL21/CAMK2D/PTGER4/F2RL1/OXTR/TRPC1/TRPC6/MCOLN2/PLCG1/LIME1/BDKRB1/PTGER3/EDNRB/CCL28/SRI/MYO5A/CCR7/GRIN2B/S1PR1/BDKRB2/PDGFRA/PTGFR/CD52/SYNPO/PRNP/PTK2B/GPR35/GPR157/CMKLR1/PTPRC/FKBP1B/P2RX7…	GO_BP
22	GO:0002237~response to molecule of bacterial origin	86	86/2709	338/18012	3.48478e-07	8.04597e-05	1.69174	ENSG00000135218/ENSG00000113448/ENSG00000150593/ENSG00000066468/ENSG00000069535/ENSG00000163347/ENSG00000081189/ENSG00000164120/ENSG00000156234/ENSG00000197943/ENSG00000109819/ENSG00000111012/ENSG00000114698/ENSG00000104312/ENSG00000171522/ENSG00000189067/ENSG00000131016/ENSG00000072694/ENSG00000153162/ENSG00000142867/ENSG00000110324/ENSG00000111961/ENSG00000184216/ENSG00000100739/ENSG00000136160…	CD36/PDE4D/PDCD4/FGFR2/MAOB/CLDN1/MEF2C/HPGD/CXCL13/PLCG2/PPARGC1A/CYP27B1/PLSCR4/RIPK2/PTGER4/LITAF/AKAP12/FCGR2B/BMP6/BCL10/IL10RA/SASH1/IRAK1/BDKRB1/EDNRB/CD180/CEBPB/MRC1/CCR7/LY86/LY96/TFPI/LDOC1/CDK4/SCARB1/DCN/SSC5D/PTGFR/CD96/PCK1/SBNO2/CAPN2/TLR1/GNG12/P2RX7/CXCL3/TLR6/AXL/CXCL1/FER/TH/CSF2RB/NR1D1/LTF/GSTP1/COMT/TNFRSF11A/CD14/ABCA1/B2M/NLRP3/PTGER2/CCL5/VCAM1/GFI1/NOD2/IRAK2/SMAD6/CXCL…	GO_BP
23	GO:0001101~response to acid chemical	86	86/2709	340/18012	4.56828e-07	8.81926e-05	1.68179	ENSG00000104332/ENSG00000105894/ENSG00000004799/ENSG00000145936/ENSG00000186469/ENSG00000135218/ENSG00000086696/ENSG00000109339/ENSG00000125398/ENSG00000170962/ENSG00000107864/ENSG00000172724/ENSG00000066468/ENSG00000162409/ENSG00000163347/ENSG00000112715/ENSG00000058668/ENSG00000165457/ENSG00000143816/ENSG00000044524/ENSG00000187134/ENSG00000148180/ENSG00000148516/ENSG00000105989/ENSG00000099194…	SFRP1/PTN/PDK4/KCNMB1/GNG2/CD36/HSD17B2/MAPK10/SOX9/PDGFD/CPEB3/CCL19/FGFR2/PRKAA2/CLDN1/VEGFA/ATP2B4/FOLR2/WNT9A/EPHA3/AKR1C1/GSN/ZEB1/WNT2/SCD/PINK1/KLF4/PPARGC1A/SHMT2/AKR1C2/DGAT2/CCL21/PTGER4/NCOA1/LTK/BMP6/E2F1/NME1/PDX1/TMEM161A/FZD4/BCL2L1/TGFBR3/ASXL1/CPEB4/PID1/TESC/CEBPB/RET/CCR7/CDK4/NSMF/PDGFRA/WNT3/PTGFR/LRP11/PCK1/CAPN2/PTK2B/COL1A1/FOXO1/ASNS/NEURL1/PTK7/TH/CCNB1/GSTP1/CYP26B1/ABC…	GO_BP
24	GO:0001655~urogenital system development	84	84/2709	330/18012	4.66127e-07	8.81926e-05	1.69246	ENSG00000104332/ENSG00000141052/ENSG00000160712/ENSG00000104267/ENSG00000171791/ENSG00000138193/ENSG00000125398/ENSG00000118526/ENSG00000170962/ENSG00000099139/ENSG00000138685/ENSG00000066468/ENSG00000124766/ENSG00000106571/ENSG00000197256/ENSG00000188906/ENSG00000081189/ENSG00000112715/ENSG00000164120/ENSG00000145088/ENSG00000145147/ENSG00000166333/ENSG00000187391/ENSG00000176928/ENSG00000136997…	SFRP1/MYOCD/IL6R/CA2/BCL2/PLCE1/SOX9/TCF21/PDGFD/PCSK5/FGF2/FGFR2/SOX4/GLI3/KANK2/LRRK2/MEF2C/VEGFA/HPGD/EAF2/SLIT2/ILK/MAGI2/GCNT4/MYC/BMP2/ANGPT1/ADAMTS1/WNT2B/EPHA4/ITGA8/TEK/ACAT1/WWTR1/WDR77/BMP6/LGR4/TNS2/HOXD13/NLE1/PPAT/PBX1/FOXF1/RET/PYGO1/SRD5A1/FAT4/DCN/STRA6/PDGFRA/ID2/FGFR1/CEP55/AGT/LIF/GCNT3/CYP26B1/SHH/PCSK9/GPR4/CENPF/NOTCH3/FRAS1/EPHB2/ACTA2/ANGPT2/ARG2/PGF/COL4A4/KIF26B/HOXD11/…	GO_BP
25	GO:0042542~response to hydrogen peroxide	44	44/2709	138/18012	4.67013e-07	8.81926e-05	2.11995	ENSG00000087258/ENSG00000171791/ENSG00000141570/ENSG00000170962/ENSG00000183023/ENSG00000109846/ENSG00000163516/ENSG00000183010/ENSG00000188906/ENSG00000158828/ENSG00000136826/ENSG00000105976/ENSG00000244734/ENSG00000106462/ENSG00000126602/ENSG00000137672/ENSG00000104695/ENSG00000198125/ENSG00000147955/ENSG00000162909/ENSG00000114346/ENSG00000120899/ENSG00000108821/ENSG00000265972/ENSG00000119782…	GNAO1/BCL2/CBX8/PDGFD/SLC8A1/CRYAB/ANKZF1/PYCR1/LRRK2/PINK1/KLF4/MET/HBB/EZH2/TRAP1/TRPC6/PPP2CB/MB/SIGMAR1/CAPN2/ECT2/PTK2B/COL1A1/TXNIP/FKBP1B/FOXO1/AXL/HBA2/NR4A3/CYP1B1/FOSL1/GPR37L1/HMOX1/DUSP1/CDK1/TRPA1/SMPD3/KLF2/MT-ND6/LCN2/FABP1/AQP1/NQO1/TRPM2	GO_BP
26	GO:0042113~B cell activation	66	66/2709	241/18012	4.94605e-07	8.81926e-05	1.82087	ENSG00000104332/ENSG00000078596/ENSG00000166501/ENSG00000154822/ENSG00000119919/ENSG00000171791/ENSG00000048052/ENSG00000012124/ENSG00000007312/ENSG00000081189/ENSG00000105369/ENSG00000169508/ENSG00000196950/ENSG00000197943/ENSG00000139193/ENSG00000010671/ENSG00000135905/ENSG00000122678/ENSG00000157404/ENSG00000028277/ENSG00000072694/ENSG00000170476/ENSG00000071564/ENSG00000152804/ENSG00000159958…	SFRP1/ITM2A/PRKCB/PLCL2/NKX2-3/BCL2/HDAC9/CD22/CD79B/MEF2C/CD79A/GPR183/SLC39A10/PLCG2/CD27/BTK/DOCK10/POLM/KIT/POU2F2/FCGR2B/MZB1/TCF3/HHEX/TNFRSF13C/MIR17HG/BANK1/CD180/KLF6/NCKAP1L/HSPD1/INHBA/HMGB3/EXO1/CMTM7/ID2/PTK2B/IGLL5/PTPRC/BST1/TNFSF13/IL11/SAMSN1/LAX1/PRKDC/PIK3CD/IKZF3/SLA2/LEF1/ITGA4/CD28/MAD2L2/SASH3/TNFSF13B/VCAM1/NOD2/LFNG/CDKN1A/BLNK/MIF/CD38/MMP14/FOXP3/INPP5D/TNFRSF4/C20orf196	GO_BP
27	GO:0010975~regulation of neuron projection development	116	116/2709	497/18012	4.95146e-07	8.81926e-05	1.55187	ENSG00000104332/ENSG00000172260/ENSG00000105894/ENSG00000065320/ENSG00000198121/ENSG00000104435/ENSG00000107562/ENSG00000111962/ENSG00000116473/ENSG00000137872/ENSG00000182175/ENSG00000115993/ENSG00000107864/ENSG00000171533/ENSG00000116741/ENSG00000149557/ENSG00000136271/ENSG00000133104/ENSG00000132003/ENSG00000188906/ENSG00000130558/ENSG00000081189/ENSG00000112715/ENSG00000156299/ENSG00000112175…	SFRP1/NEGR1/PTN/NTN1/LPAR1/STMN2/CXCL12/UST/RAP1A/SEMA6D/RGMA/TRAK2/CPEB3/MAP6/RGS2/FEZ1/DDX56/SPART/ZSWIM4/LRRK2/OLFM1/MEF2C/VEGFA/TIAM1/BMP5/YTHDF1/EPHA3/SLIT2/ILK/MAGI2/CPNE5/NPTN/NEDD4L/EFNA5/ZSWIM6/ZEB2/KLF4/SEMA6A/LRP8/PLXNA1/SEMA3G/EPHA4/TNFRSF12A/APBB1/LIMK1/ARHGAP44/LTK/NGFR/GPRASP2/NME1/EZH2/PMP22/NDNF/VLDLR/TRPC6/FZD4/SDK1/FGF13/MAP1B/PRKN/SS18L1/RET/ITM2C/LZTS3/NSMF/WNT3/PLXNB1/KLK6/N…	GO_BP
28	GO:0007411~axon guidance	73	73/2709	276/18012	5.47772e-07	9.48558e-05	1.7586	ENSG00000151892/ENSG00000149294/ENSG00000065320/ENSG00000134121/ENSG00000107562/ENSG00000101680/ENSG00000182168/ENSG00000144619/ENSG00000168280/ENSG00000137872/ENSG00000184347/ENSG00000149557/ENSG00000106571/ENSG00000132003/ENSG00000112715/ENSG00000162614/ENSG00000109458/ENSG00000173898/ENSG00000149658/ENSG00000044524/ENSG00000145147/ENSG00000156642/ENSG00000100784/ENSG00000184349/ENSG00000130449…	GFRA1/NCAM1/NTN1/CHL1/CXCL12/LAMA1/UNC5C/CNTN4/KIF5C/SEMA6D/SLIT3/FEZ1/GLI3/ZSWIM4/VEGFA/NEXN/GAB1/SPTBN2/YTHDF1/EPHA3/SLIT2/NPTN/RPS6KA5/EFNA5/ZSWIM6/PALLD/SEMA6A/PLXNA1/SEMA3G/EPHA4/FEZ2/MATN2/EPHB4/BOC/VLDLR/FLRT2/CELSR3/PLCG1/GRB7/RET/NTN4/NFASC/EPHB6/EPHA1/WNT3/PLA2G10/PLXNB1/L1CAM/PLXNA3/PTPRM/SPTBN5/NR4A3/PIK3CD/SHH/ROBO3/AGRN/PLXNC1/SCN1B/EPHB2/ATOH1/LAMA2/CSF1R/EFNA3/NEO1/PDLIM7/EPHB3/NR…	GO_BP
29	GO:0007159~leukocyte cell-cell adhesion	84	84/2709	332/18012	6.11226e-07	9.91214e-05	1.68226	ENSG00000160712/ENSG00000107562/ENSG00000127951/ENSG00000138735/ENSG00000105974/ENSG00000204936/ENSG00000172724/ENSG00000106571/ENSG00000158473/ENSG00000134352/ENSG00000170677/ENSG00000099866/ENSG00000111863/ENSG00000159216/ENSG00000136826/ENSG00000076641/ENSG00000139193/ENSG00000090659/ENSG00000143772/ENSG00000104312/ENSG00000114455/ENSG00000121807/ENSG00000137077/ENSG00000072694/ENSG00000142867…	IL6R/CXCL12/FGL2/PDE5A/CAV1/CD177/CCL19/GLI3/CD1D/IL6ST/SOCS6/MADCAM1/ADTRP/RUNX1/KLF4/PAG1/CD27/CD209/ITPKB/RIPK2/HHLA2/CCR2/CCL21/FCGR2B/BCL10/IRAK1/RIPOR2/LGALS9C/HSPH1/CD44/TNFRSF13C/VSIR/CCL28/CEBPB/ZC3H8/CBFB/NCKAP1L/CCR7/LGALS9B/HSPD1/PODXL2/AIF1/VSIG4/PRNP/ZP3/LGALS3/PTPRC/SELL/LAX1/NR4A3/VAV1/SHH/IL23A/ITGB7/ITGA4/CD28/HLX/NLRP3/ITGAL/DOCK8/SASH3/CEACAM1/TNFSF13B/CCL5/VCAM1/ARG2/NOD2/TST…	GO_BP
30	GO:0010038~response to metal ion	89	89/2709	363/18012	1.221e-06	0.000172994	1.63018	ENSG00000205364/ENSG00000205358/ENSG00000198417/ENSG00000145936/ENSG00000198523/ENSG00000156113/ENSG00000187193/ENSG00000104267/ENSG00000171791/ENSG00000139117/ENSG00000104154/ENSG00000105974/ENSG00000198668/ENSG00000162409/ENSG00000069535/ENSG00000163347/ENSG00000125648/ENSG00000188906/ENSG00000081189/ENSG00000125144/ENSG00000068831/ENSG00000169715/ENSG00000125148/ENSG00000148180/ENSG00000124772…	MT1M/MT1H/MT1F/KCNMB1/PLN/KCNMA1/MT1X/CA2/BCL2/CPNE8/SLC30A4/CAV1/CALM1/PRKAA2/MAOB/CLDN1/SLC25A23/LRRK2/MEF2C/MT1G/RASGRP2/MT1E/MT2A/GSN/CPNE5/NEDD4L/ANK3/PPARGC1A/ITPKB/CPNE1/CHP2/KIT/APBB1/CAMK2D/HVCN1/CYBRD1/CCND1/BMP6/TRPC1/DPEP1/CACNA1H/PDX1/SORD/PPP2CB/PRKN/SYT11/TFR2/CPNE7/CDK4/ID2/PRNP/ECT2/PTK2B/CLIC4/TXNIP/SYT7/P2RX7/SLC25A24/TH/ZNF658/LOXL2/CCNB1/SHH/DTYMK/FOSB/CD14/NCF1/B2M/HOMER1/HM…	GO_BP
31	GO:0070661~leukocyte proliferation	76	76/2709	297/18012	1.29906e-06	0.000179963	1.70141	ENSG00000160712/ENSG00000154822/ENSG00000138735/ENSG00000171791/ENSG00000012124/ENSG00000172724/ENSG00000158473/ENSG00000081189/ENSG00000105851/ENSG00000105369/ENSG00000169508/ENSG00000134352/ENSG00000196950/ENSG00000049130/ENSG00000010671/ENSG00000090659/ENSG00000104312/ENSG00000114455/ENSG00000157404/ENSG00000121807/ENSG00000120885/ENSG00000072694/ENSG00000164251/ENSG00000106348/ENSG00000170476…	IL6R/PLCL2/PDE5A/BCL2/CD22/CCL19/CD1D/MEF2C/PIK3CG/CD79A/GPR183/IL6ST/SLC39A10/KITLG/BTK/CD209/RIPK2/HHLA2/KIT/CCR2/CLU/FCGR2B/F2RL1/IMPDH1/MZB1/LGALS9C/HHEX/TNFRSF13C/VSIR/CD180/CEBPB/NCKAP1L/LGALS9B/DOCK2/HSPD1/AIF1/HELLS/VSIG4/PRNP/ZP3/LGALS3/PTPRC/FKBP1B/BST1/P2RX7/GSTP1/NPR3/SHH/IL23A/IKZF3/LEF1/CD28/DOCK8/CSF1R/SASH3/TNFSF13B/CCL5/VCAM1/ARG2/CDKN1A/EBI3/HLA-DMB/CD4/MIF/BMP4/GPNMB/CD38/SLC11…	GO_BP
32	GO:0031346~positive regulation of cell projection organization	92	92/2709	381/18012	1.63739e-06	0.000208317	1.60552	ENSG00000172260/ENSG00000105894/ENSG00000065320/ENSG00000198121/ENSG00000104435/ENSG00000107562/ENSG00000116473/ENSG00000108773/ENSG00000107864/ENSG00000171533/ENSG00000116741/ENSG00000172724/ENSG00000149557/ENSG00000136271/ENSG00000112715/ENSG00000099864/ENSG00000156299/ENSG00000112175/ENSG00000044524/ENSG00000145147/ENSG00000166333/ENSG00000187391/ENSG00000124772/ENSG00000156642/ENSG00000049759…	NEGR1/PTN/NTN1/LPAR1/STMN2/CXCL12/RAP1A/KAT2A/CPEB3/MAP6/RGS2/CCL19/FEZ1/DDX56/VEGFA/PALM/TIAM1/BMP5/EPHA3/SLIT2/ILK/MAGI2/CPNE5/NPTN/NEDD4L/DZIP1/EFNA5/ZEB2/LRP8/PLXNA1/EPHA4/KIT/TNFRSF12A/CCL21/APBB1/LIMK1/ANLN/SDCCAG3/LTK/NGFR/F2RL1/GPRASP2/NME1/EZH2/NDNF/RIPOR2/VLDLR/FZD4/WASL/MAP1B/ENPP2/PRKN/SS18L1/RET/CCR7/C15orf62/WNT3/APC/PLXNB1/NDRG4/CDC42EP3/PTK2B/L1CAM/PLXNA3/FGFR1/FKBP1B/P2RX7/P3H1/C…	GO_BP
33	GO:0007015~actin filament organization	94	94/2709	394/18012	2.20282e-06	0.000254303	1.5863	ENSG00000168309/ENSG00000101605/ENSG00000104332/ENSG00000165410/ENSG00000112186/ENSG00000198121/ENSG00000107562/ENSG00000171791/ENSG00000130055/ENSG00000163431/ENSG00000078114/ENSG00000172403/ENSG00000140416/ENSG00000154556/ENSG00000173898/ENSG00000145147/ENSG00000148180/ENSG00000144824/ENSG00000109265/ENSG00000133627/ENSG00000158352/ENSG00000155846/ENSG00000095637/ENSG00000204713/ENSG00000088756…	FAM107A/MYOM1/SFRP1/CFL2/CAP2/LPAR1/CXCL12/BCL2/GDPD2/LMOD1/NEBL/SYNPO2/TPM1/SORBS2/SPTBN2/SLIT2/GSN/PHLDB2/KIAA1211/ACTR3B/SHROOM4/PPARGC1B/SORBS1/TRIM27/ARHGAP28/PDLIM3/CCL21/MET/LIMK1/PTGER4/ASAP3/TMOD2/F2RL1/LIMA1/TPM2/GAS7/RHOJ/RHOU/SCIN/WASL/PRKN/MARCKS/NCKAP1L/CCR7/DIAPH3/AIF1L/ARRB1/S1PR1/PLS1/FLNA/IQGAP2/ARHGAP25/C15orf62/EPHA1/AIF1/SYNPO/RHOF/ARHGAP6/EFS/CDC42EP3/PTK2B/DSTN/DLC1/GMFB/RH…	GO_BP
34	GO:0032956~regulation of actin cytoskeleton organization	83	83/2709	337/18012	2.27877e-06	0.000258288	1.63757	ENSG00000168309/ENSG00000104332/ENSG00000046653/ENSG00000165410/ENSG00000198121/ENSG00000107562/ENSG00000150764/ENSG00000163431/ENSG00000172403/ENSG00000140416/ENSG00000081189/ENSG00000173898/ENSG00000044524/ENSG00000145147/ENSG00000166333/ENSG00000148180/ENSG00000166086/ENSG00000184349/ENSG00000144824/ENSG00000109265/ENSG00000133627/ENSG00000204713/ENSG00000088756/ENSG00000137077/ENSG00000105976…	FAM107A/SFRP1/GPM6B/CFL2/LPAR1/CXCL12/DIXDC1/LMOD1/SYNPO2/TPM1/MEF2C/SPTBN2/EPHA3/SLIT2/ILK/GSN/JAM3/EFNA5/PHLDB2/KIAA1211/ACTR3B/TRIM27/ARHGAP28/CCL21/MET/LIMK1/ARHGAP44/TEK/PTGER4/ASAP3/TMOD2/F2RL1/LIMA1/RHOJ/RHOU/SCIN/WASL/PRKN/GRHL3/NCKAP1L/CCR7/S1PR1/FLNA/IQGAP2/C15orf62/EPHA1/PDGFRA/SYNPO/RHOF/ECT2/ARHGAP6/CDC42EP3/PTK2B/ARHGEF19/BST1/CCDC88A/DSTN/DLC1/GMFB/RHOH/CELSR1/SPTBN5/FER/CDK10/GMFG…	GO_BP
35	GO:0097553~calcium ion transmembrane import into cytosol	42	42/2709	137/18012	2.66125e-06	0.000283714	2.03836	ENSG00000145362/ENSG00000198523/ENSG00000151320/ENSG00000113448/ENSG00000149596/ENSG00000153956/ENSG00000138193/ENSG00000213366/ENSG00000198668/ENSG00000138685/ENSG00000172724/ENSG00000183023/ENSG00000164850/ENSG00000198947/ENSG00000155962/ENSG00000150995/ENSG00000058668/ENSG00000103888/ENSG00000197943/ENSG00000105464/ENSG00000137077/ENSG00000145349/ENSG00000144935/ENSG00000153898/ENSG00000124181…	ANK2/PLN/AKAP6/PDE4D/JPH2/CACNA2D1/PLCE1/GSTM2/CALM1/FGF2/CCL19/SLC8A1/GPER1/DMD/CLIC2/ITPR1/ATP2B4/CEMIP/PLCG2/GRIN2D/CCL21/CAMK2D/TRPC1/MCOLN2/PLCG1/LIME1/BDKRB1/SRI/MYO5A/CCR7/GRIN2B/PRNP/PTK2B/PTPRC/FKBP1B/P2RX7/CHD7/JPH1/TRPA1/CACNA1C/CXCL11/TRPM2	GO_BP
36	GO:0018108~peptidyl-tyrosine phosphorylation	87	87/2709	359/18012	2.66321e-06	0.000283714	1.6113	ENSG00000104332/ENSG00000112964/ENSG00000185483/ENSG00000160712/ENSG00000135218/ENSG00000105974/ENSG00000170962/ENSG00000070759/ENSG00000066468/ENSG00000112715/ENSG00000044524/ENSG00000134352/ENSG00000113296/ENSG00000184349/ENSG00000162733/ENSG00000049130/ENSG00000140285/ENSG00000154188/ENSG00000157193/ENSG00000060140/ENSG00000010671/ENSG00000104312/ENSG00000116106/ENSG00000157404/ENSG00000137601…	SFRP1/GHR/ROR1/IL6R/CD36/CAV1/PDGFD/TESK2/FGFR2/VEGFA/EPHA3/IL6ST/THBS4/EFNA5/DDR2/KITLG/FGF7/ANGPT1/LRP8/STYK1/BTK/RIPK2/EPHA4/KIT/NEK1/MET/TEK/LTK/BMP6/EPHB4/NCAPG2/CD44/ITGB3/BANK1/ENPP2/RET/TAL1/ROR2/EPHB6/EPHA1/EFEMP1/PDGFRA/FGFR4/PRNP/PTK2B/PTPRC/FGFR1/BST1/MELK/AGT/IL11/AXL/NEURL1/SAMSN1/LIF/FER/ZFYVE28/HCLS1/IL23A/NRG1/TTK/NCF1/NEDD9/TNK2/ALKAL1/EPHB2/CSPG4/CSF1R/NTRK2/SRMS/CCL5/SH3BP5/SF…	GO_BP
37	GO:0002683~negative regulation of immune system process	105	105/2709	455/18012	2.95207e-06	0.000303409	1.53437	ENSG00000104332/ENSG00000107562/ENSG00000127951/ENSG00000154822/ENSG00000271447/ENSG00000138735/ENSG00000134138/ENSG00000125398/ENSG00000012124/ENSG00000143995/ENSG00000101695/ENSG00000164850/ENSG00000106571/ENSG00000101782/ENSG00000133710/ENSG00000164342/ENSG00000112175/ENSG00000145147/ENSG00000137265/ENSG00000170677/ENSG00000111863/ENSG00000159216/ENSG00000049130/ENSG00000136997/ENSG00000154188…	SFRP1/CXCL12/FGL2/PLCL2/MMP28/PDE5A/MEIS2/SOX9/CD22/MEIS1/RNF125/GPER1/GLI3/RIOK3/SPINK5/TLR3/BMP5/SLIT2/IRF4/SOCS6/ADTRP/RUNX1/KITLG/MYC/ANGPT1/PAG1/BTK/PADI2/ITPKB/TRIM27/CCR2/GCSAM/CCL21/PTGER4/FCGR2B/F2RL1/BCL10/LGR4/NME1/NOV/RIPOR2/NCAPG2/LGALS9C/WASL/BANK1/VSIR/FOXF1/CCL28/CEBPB/ZC3H8/CBFB/LGALS9B/TAL1/LY96/LRRC17/INHBA/HMGB3/CD96/TSC22D3/VSIG4/ID2/PRNP/PTK2B/LGALS3/PTPRC/HLA-DOB/TLR6/AXL/S…	GO_BP
38	GO:0071248~cellular response to metal ion	53	53/2709	189/18012	2.96887e-06	0.000303409	1.86452	ENSG00000205364/ENSG00000205358/ENSG00000198417/ENSG00000187193/ENSG00000139117/ENSG00000162409/ENSG00000163347/ENSG00000125648/ENSG00000188906/ENSG00000081189/ENSG00000125144/ENSG00000068831/ENSG00000169715/ENSG00000125148/ENSG00000148180/ENSG00000124772/ENSG00000151150/ENSG00000109819/ENSG00000143772/ENSG00000214078/ENSG00000166869/ENSG00000145349/ENSG00000122986/ENSG00000153162/ENSG00000015413…	MT1M/MT1H/MT1F/MT1X/CPNE8/PRKAA2/CLDN1/SLC25A23/LRRK2/MEF2C/MT1G/RASGRP2/MT1E/MT2A/GSN/CPNE5/ANK3/PPARGC1A/ITPKB/CPNE1/CHP2/CAMK2D/HVCN1/BMP6/DPEP1/CACNA1H/PRKN/SYT11/TFR2/CPNE7/ID2/PRNP/ECT2/CLIC4/SYT7/SLC25A24/TH/ZNF658/CCNB1/SHH/FOSB/NCF1/B2M/HMOX1/SMPD3/SYT1/AQP1/AOC1/CYBB/NQO1/TRPM2/WNT5A/SYT13	GO_BP
39	GO:0010810~regulation of cell-substrate adhesion	57	57/2709	210/18012	3.9075e-06	0.000363573	1.80471	ENSG00000168309/ENSG00000111846/ENSG00000104332/ENSG00000154175/ENSG00000046653/ENSG00000105894/ENSG00000138722/ENSG00000135218/ENSG00000171791/ENSG00000164176/ENSG00000112715/ENSG00000044524/ENSG00000072163/ENSG00000166333/ENSG00000184349/ENSG00000162733/ENSG00000144824/ENSG00000137077/ENSG00000120156/ENSG00000198759/ENSG00000173376/ENSG00000174804/ENSG00000091986/ENSG00000103241/ENSG00000151882…	FAM107A/GCNT2/SFRP1/ABI3BP/GPM6B/PTN/MMRN1/CD36/BCL2/EDIL3/VEGFA/EPHA3/LIMS2/ILK/EFNA5/DDR2/PHLDB2/CCL21/TEK/EGFL6/NDNF/FZD4/CCDC80/FOXF1/CCL28/CCR7/FLNA/ACVRL1/EPHA1/ECM2/FERMT1/RELL2/ARHGAP6/PTK2B/PLAU/COL1A1/BST1/DLC1/MYADM/NEDD9/ONECUT2/PDPN/ANGPT2/SPOCK2/FBLN1/FBLN2/CASS4/MMP14/CD3E/MELTF/LIMCH1/CEACAM6/CDKN2A/TACSTD2/SERPINE1/FZD7/AGR2	GO_BP
40	GO:0055074~calcium ion homeostasis	107	107/2709	469/18012	4.13761e-06	0.000372547	1.51692	ENSG00000145362/ENSG00000166501/ENSG00000198523/ENSG00000198121/ENSG00000173175/ENSG00000135218/ENSG00000107562/ENSG00000169860/ENSG00000151320/ENSG00000113448/ENSG00000149596/ENSG00000171791/ENSG00000153956/ENSG00000138193/ENSG00000105974/ENSG00000173198/ENSG00000213366/ENSG00000198668/ENSG00000138685/ENSG00000172724/ENSG00000183023/ENSG00000164850/ENSG00000125648/ENSG00000198947/ENSG00000155962…	ANK2/PRKCB/PLN/LPAR1/ADCY5/CD36/CXCL12/P2RY1/AKAP6/PDE4D/JPH2/BCL2/CACNA2D1/PLCE1/CAV1/CYSLTR1/GSTM2/CALM1/FGF2/CCL19/SLC8A1/GPER1/SLC25A23/DMD/CLIC2/ITPR1/PIK3CG/ATP2B4/EDN3/CXCL13/GNA13/CEMIP/NPTN/GRINA/PLCG2/P2RX1/CYP27B1/P2RY8/GRIN2D/CACNB2/CCR2/CCL21/CAMK2D/PTGER4/F2RL1/CCL15/OXTR/TRPC1/TRPC6/MCOLN2/SLC35G1/PLCG1/LIME1/BDKRB1/DMPK/PTGER3/EDNRB/ATP2B1/CCL28/SRI/MYO5A/EPHX2/CCR7/GRIN2B/S1PR1/B…	GO_BP
41	GO:0008016~regulation of heart contraction	64	64/2709	245/18012	4.18324e-06	0.000372547	1.73687	ENSG00000185774/ENSG00000087258/ENSG00000145362/ENSG00000121577/ENSG00000112276/ENSG00000198523/ENSG00000138735/ENSG00000113448/ENSG00000177098/ENSG00000100604/ENSG00000137726/ENSG00000153956/ENSG00000105974/ENSG00000151090/ENSG00000213366/ENSG00000198668/ENSG00000116741/ENSG00000183023/ENSG00000140416/ENSG00000198947/ENSG00000155962/ENSG00000150995/ENSG00000105851/ENSG00000058668/ENSG00000124205…	KCNIP4/GNAO1/ANK2/POPDC2/BVES/PLN/PDE5A/PDE4D/SCN4B/CHGA/FXYD6/CACNA2D1/CAV1/THRB/GSTM2/CALM1/RGS2/SLC8A1/TPM1/DMD/CLIC2/ITPR1/PIK3CG/ATP2B4/EDN3/NPR1/HSPB7/GPD1L/CACNB2/CAMK2D/DSC2/TRPC1/APLN/CACNA1H/FGF13/KCNJ14/DMPK/ATP2B1/SRI/DES/GJC1/FLNA/FKBP1B/CACNA1D/AGT/IRX5/KCND3/ATP5J/TH/TMIGD3/ABCC9/SCN1B/ATP2A3/AKAP9/SLC1A1/ATP1A3/CORIN/STC1/FXYD3/CACNA1C/KCNJ11/ATP2A1/RGS4/ZC3H12A	GO_BP
42	GO:1903531~negative regulation of secretion by cell	56	56/2709	206/18012	4.49752e-06	0.000394895	1.80748	ENSG00000104332/ENSG00000075073/ENSG00000169860/ENSG00000048052/ENSG00000100604/ENSG00000116473/ENSG00000115590/ENSG00000012124/ENSG00000069535/ENSG00000111863/ENSG00000129667/ENSG00000119541/ENSG00000154188/ENSG00000082196/ENSG00000204713/ENSG00000121807/ENSG00000171522/ENSG00000072694/ENSG00000164251/ENSG00000205213/ENSG00000136999/ENSG00000186188/ENSG00000153064/ENSG00000103241/ENSG00000185345…	SFRP1/TACR2/P2RY1/HDAC9/CHGA/RAP1A/IL1R2/CD22/MAOB/ADTRP/RHBDF2/VPS4B/ANGPT1/C1QTNF3/TRIM27/CCR2/PTGER4/FCGR2B/F2RL1/LGR4/NOV/FFAR4/BANK1/FOXF1/PRKN/SYT11/INHBA/SSC5D/RSAD2/FKBP1B/VSNL1/TLR6/IL11/LIF/RHBDF1/ASIC1/NLRP3/NMB/CBARP/TLR8/CEACAM1/ACVR1C/HMOX1/ARG2/SRGN/KCNJ11/SRCIN1/FOXP3/CD84/INHBB/OSM/FAM3D/TNFRSF4/ZC3H12A/PPP1R9A/ADRA2A	GO_BP
43	GO:0050863~regulation of T cell activation	77	77/2709	312/18012	4.81347e-06	0.000405502	1.64093	ENSG00000160712/ENSG00000127951/ENSG00000138735/ENSG00000108773/ENSG00000105974/ENSG00000152495/ENSG00000172724/ENSG00000106571/ENSG00000158473/ENSG00000133710/ENSG00000137265/ENSG00000134352/ENSG00000148180/ENSG00000170677/ENSG00000148516/ENSG00000159216/ENSG00000076641/ENSG00000139193/ENSG00000090659/ENSG00000143772/ENSG00000104312/ENSG00000114455/ENSG00000121807/ENSG00000137077/ENSG00000072694…	IL6R/FGL2/PDE5A/KAT2A/CAV1/CAMK4/CCL19/GLI3/CD1D/SPINK5/IRF4/IL6ST/GSN/SOCS6/ZEB1/RUNX1/PAG1/CD27/CD209/ITPKB/RIPK2/HHLA2/CCR2/CCL21/FCGR2B/BCL10/RIPOR2/LGALS9C/HSPH1/TNFRSF13C/VSIR/CEBPB/ZC3H8/FANCA/CBFB/NCKAP1L/CCR7/LGALS9B/HSPD1/AIF1/VSIG4/PRNP/ZP3/LGALS3/PTPRC/LAX1/VAV1/CYP26B1/SHH/IL23A/HLA-DOA/CD28/HLX/NLRP3/DOCK8/SASH3/CEACAM1/TNFSF13B/CCL5/VCAM1/ARG2/NOD2/EBI3/TNFAIP8L2/HLA-DMB/CD4/BMP4/G…	GO_BP
44	GO:0007052~mitotic spindle organization	34	34/2709	105/18012	6.19385e-06	0.000478895	2.15299	ENSG00000066629/ENSG00000088325/ENSG00000101146/ENSG00000255112/ENSG00000119541/ENSG00000127955/ENSG00000101057/ENSG00000087586/ENSG00000164114/ENSG00000090889/ENSG00000166851/ENSG00000237649/ENSG00000196924/ENSG00000180198/ENSG00000117650/ENSG00000064102/ENSG00000134222/ENSG00000075702/ENSG00000137807/ENSG00000198901/ENSG00000123473/ENSG00000136122/ENSG00000117399/ENSG00000134057/ENSG00000143228…	EML1/TPX2/RAE1/CHMP1B/VPS4B/GNAI1/MYBL2/AURKA/MAP9/KIF4A/PLK1/KIFC1/FLNA/RCC1/NEK2/INTS13/PSRC1/WDR62/KIF23/PRC1/STIL/BORA/CDC20/CCNB1/NUF2/BIRC5/TTK/GPSM2/CEP126/AURKB/CHMP4C/HSPA1B/TACC1/CENPE	GO_BP
45	GO:0001933~negative regulation of protein phosphorylation	96	96/2709	414/18012	6.26036e-06	0.000478895	1.54179	ENSG00000135549/ENSG00000104332/ENSG00000048540/ENSG00000005249/ENSG00000135842/ENSG00000141052/ENSG00000113448/ENSG00000114166/ENSG00000147883/ENSG00000105974/ENSG00000090447/ENSG00000198668/ENSG00000116741/ENSG00000164850/ENSG00000150593/ENSG00000154277/ENSG00000188906/ENSG00000198947/ENSG00000197852/ENSG00000145147/ENSG00000166333/ENSG00000101255/ENSG00000162407/ENSG00000152642/ENSG00000136997…	PKIB/SFRP1/LMO3/PRKAR2B/FAM129A/MYOCD/PDE4D/KAT2B/CDKN2B/CAV1/TFAP4/CALM1/RGS2/GPER1/PDCD4/UCHL1/LRRK2/DMD/FAM212B/SLIT2/ILK/TRIB3/PLPP3/GPD1L/MYC/PINK1/ANGPT1/SMPD1/KLF4/PPARGC1A/SEMA6A/CDK5RAP1/NDRG2/SYNJ2BP/TRIM27/WWTR1/F2RL1/SPRY4/RASSF2/PER1/PBLD/KLHL31/GNAQ/BDKRB1/HHEX/PID1/TESC/PRKN/XDH/PLK1/ARRB1/FOXM1/DUSP19/BDKRB2/GSKIP/EPHA1/APC/PMEPA1/MLXIPL/PRNP/DUSP14/PTPRC/PKIA/FOXO1/P2RX7/GMFB/DDI…	GO_BP
46	GO:0071466~cellular response to xenobiotic stimulus	50	50/2709	179/18012	6.29922e-06	0.000478895	1.85725	ENSG00000186642/ENSG00000112964/ENSG00000197165/ENSG00000095303/ENSG00000113580/ENSG00000196620/ENSG00000213366/ENSG00000090447/ENSG00000242515/ENSG00000183023/ENSG00000156804/ENSG00000131471/ENSG00000187134/ENSG00000109819/ENSG00000096384/ENSG00000171428/ENSG00000196502/ENSG00000166508/ENSG00000101412/ENSG00000134202/ENSG00000015413/ENSG00000172379/ENSG00000173597/ENSG00000117791/ENSG00000120915…	PDE2A/GHR/SULT1A2/PTGS1/NR3C1/UGT2B15/GSTM2/TFAP4/UGT1A10/SLC8A1/FBXO32/AOC3/AKR1C1/PPARGC1A/HSP90AB1/NAT1/SULT1A1/MCM7/E2F1/GSTM3/DPEP1/ARNT2/SULT1B1/MARC2/EPHX2/SRD5A1/NAT2/AIF1/PCK1/CES3/CYP2D7/CYP2S1/FOXO1/DNMT3B/RORA/DDIT4/CES2/CYP1B1/GSTP1/CYP26B1/CMBL/GSTM4/EIF4EBP1/AQP1/AOC1/CYP2B6/NQO1/RORC/CES1/ABCC2	GO_BP
47	GO:0046660~female sex differentiation	36	36/2709	115/18012	7.95549e-06	0.000563574	2.08141	ENSG00000104332/ENSG00000171791/ENSG00000184347/ENSG00000112715/ENSG00000145147/ENSG00000169946/ENSG00000049130/ENSG00000154734/ENSG00000157404/ENSG00000174804/ENSG00000171552/ENSG00000130699/ENSG00000172216/ENSG00000139618/ENSG00000180530/ENSG00000187741/ENSG00000122641/ENSG00000145545/ENSG00000137486/ENSG00000145685/ENSG00000137868/ENSG00000134853/ENSG00000188372/ENSG00000171316/ENSG00000054356…	SFRP1/BCL2/SLIT3/VEGFA/SLIT2/ZFPM2/KITLG/ADAMTS1/KIT/FZD4/BCL2L1/TAF4/CEBPB/BRCA2/NRIP1/FANCA/INHBA/SRD5A1/ARRB1/LHFPL2/STRA6/PDGFRA/ZP3/CHD7/PTPRN/AXL/DACH1/ANG/LFNG/MMP14/HYAL3/INHBB/NUPR1/WNT5A/TYRO3/COL9A3	GO_BP
48	GO:0007548~sex differentiation	68	68/2709	270/18012	8.20477e-06	0.000574702	1.67455	ENSG00000104332/ENSG00000164442/ENSG00000171791/ENSG00000125398/ENSG00000184347/ENSG00000118526/ENSG00000137273/ENSG00000205336/ENSG00000081059/ENSG00000112715/ENSG00000164342/ENSG00000112175/ENSG00000145147/ENSG00000169946/ENSG00000049130/ENSG00000154734/ENSG00000134245/ENSG00000129473/ENSG00000266412/ENSG00000157404/ENSG00000084676/ENSG00000110092/ENSG00000153162/ENSG00000205213/ENSG00000128714…	SFRP1/CITED2/BCL2/SOX9/SLIT3/TCF21/FOXF2/ADGRG1/TCF7/VEGFA/TLR3/BMP5/SLIT2/ZFPM2/KITLG/ADAMTS1/WNT2B/BCL2L2/NCOA4/KIT/NCOA1/CCND1/BMP6/LGR4/HOXD13/CBX2/EIF2S2/FZD4/BCL2L1/PBX1/TAF4/CEBPB/BRCA2/NRIP1/FANCA/INHBA/ROR2/SRD5A1/ARRB1/FLNA/LHFPL2/CENPI/STRA6/PDGFRA/TNFSF10/ZP3/CHD7/IRX5/PTPRN/AXL/SHH/KIF18A/DACH1/PRDX4/ANG/LRRC6/SFRP2/MAMLD1/LFNG/ASPM/CTSV/MMP14/HYAL3/INHBB/NUPR1/WNT5A/TYRO3/COL9A3	GO_BP
49	GO:0140014~mitotic nuclear division	67	67/2709	265/18012	8.30146e-06	0.000574702	1.68105	ENSG00000079335/ENSG00000088325/ENSG00000175063/ENSG00000124205/ENSG00000174808/ENSG00000185909/ENSG00000255112/ENSG00000119541/ENSG00000071539/ENSG00000101057/ENSG00000087586/ENSG00000186185/ENSG00000011426/ENSG00000179041/ENSG00000142945/ENSG00000135476/ENSG00000164114/ENSG00000175662/ENSG00000146670/ENSG00000090889/ENSG00000136982/ENSG00000149636/ENSG00000166851/ENSG00000121152/ENSG00000237649…	CDC14A/TPX2/UBE2C/EDN3/BTC/KLHDC8B/CHMP1B/VPS4B/TRIP13/MYBL2/AURKA/KIF18B/ANLN/RRS1/KIF2C/ESPL1/MAP9/TOM1L2/CDCA5/KIF4A/DSCC1/DSN1/PLK1/NCAPH/KIFC1/BUB1/FLNA/CAV2/RCC1/PKMYT1/NEK2/APC/PSRC1/CDC6/KIF23/CDT1/KNTC1/MTBP/UBE2S/NAA10/CDCA8/PRC1/CDC25C/BORA/CDC20/CCNB1/NUF2/BIRC5/KIF18A/PTTG1/CENPF/TTK/CD28/KIF14/NCAPG/MAD2L1/MAD2L2/MKI67/BUB1B/AURKB/SGO1/CHMP4C/DUSP1/HSPA1B/SMPD3/BMP4/CENPE	GO_BP
50	GO:0050673~epithelial cell proliferation	96	96/2709	417/18012	8.5947e-06	0.000574702	1.53069	ENSG00000104332/ENSG00000105894/ENSG00000107562/ENSG00000062038/ENSG00000171951/ENSG00000125398/ENSG00000147883/ENSG00000105974/ENSG00000128573/ENSG00000138685/ENSG00000066468/ENSG00000119138/ENSG00000081189/ENSG00000101445/ENSG00000112715/ENSG00000146469/ENSG00000145088/ENSG00000112175/ENSG00000072163/ENSG00000113296/ENSG00000239697/ENSG00000105989/ENSG00000183856/ENSG00000140285/ENSG00000136997…	SFRP1/PTN/CXCL12/CDH3/SCG2/SOX9/CDKN2B/CAV1/FOXP2/FGF2/FGFR2/KLF9/MEF2C/PPP1R16B/VEGFA/VIP/EAF2/BMP5/LIMS2/THBS4/TNFSF12/WNT2/IQGAP3/FGF7/MYC/BMP2/SYNJ2BP/BCL2L2/JCAD/KIT/TEK/NGFR/CCND1/WDR77/BMP6/JAML/ATP5A1/LGR4/NME1/APLN/ZNF304/NOV/TGFBR3/PBLD/PLCG1/ITGB3/EDNRB/UHRF1/CEBPB/BRCA2/AKT3/XDH/ZNF703/WFDC1/SCARB1/CAV2/ACVRL1/FERMT1/ID2/FGFR1/PTPRM/MCC/PTPRN/FGFBP1/NR4A3/PRKDC/NR1D1/LOXL2/SHH/MST1/CD…	GO_BP
51	GO:0048662~negative regulation of smooth muscle cell proliferation	22	22/2709	56/18012	8.61313e-06	0.000574702	2.61209	ENSG00000141052/ENSG00000164850/ENSG00000150593/ENSG00000140416/ENSG00000081189/ENSG00000146469/ENSG00000169418/ENSG00000166333/ENSG00000130176/ENSG00000185532/ENSG00000136826/ENSG00000109819/ENSG00000165795/ENSG00000171388/ENSG00000204472/ENSG00000103034/ENSG00000084207/ENSG00000113389/ENSG00000093010/ENSG00000214274/ENSG00000100292/ENSG00000124762	MYOCD/GPER1/PDCD4/TPM1/MEF2C/VIP/NPR1/ILK/CNN1/PRKG1/KLF4/PPARGC1A/NDRG2/APLN/AIF1/NDRG4/GSTP1/NPR3/COMT/ANG/HMOX1/CDKN1A	GO_BP
52	GO:0048659~smooth muscle cell proliferation	45	45/2709	157/18012	8.6908e-06	0.000574702	1.90575	ENSG00000166831/ENSG00000141052/ENSG00000160712/ENSG00000170962/ENSG00000115252/ENSG00000138685/ENSG00000164850/ENSG00000150593/ENSG00000066468/ENSG00000140416/ENSG00000081189/ENSG00000164120/ENSG00000146469/ENSG00000169418/ENSG00000166333/ENSG00000130176/ENSG00000185532/ENSG00000136826/ENSG00000109819/ENSG00000154734/ENSG00000165795/ENSG00000171388/ENSG00000184216/ENSG00000136999/ENSG00000170989…	RBPMS2/MYOCD/IL6R/PDGFD/PDE1A/FGF2/GPER1/PDCD4/FGFR2/TPM1/MEF2C/HPGD/VIP/NPR1/ILK/CNN1/PRKG1/KLF4/PPARGC1A/ADAMTS1/NDRG2/APLN/IRAK1/NOV/S1PR1/AIF1/NDRG4/ID2/AGT/NR4A3/PRKDC/GSTP1/NPR3/COMT/NOTCH3/ITGA2/ANG/CCL5/HMOX1/WISP1/SMPD3/CDKN1A/TERT/BMP4/SERPINF2	GO_BP
53	GO:0040013~negative regulation of locomotion	86	86/2709	364/18012	8.77617e-06	0.000574702	1.57091	ENSG00000104332/ENSG00000105894/ENSG00000141052/ENSG00000107562/ENSG00000271447/ENSG00000164442/ENSG00000171791/ENSG00000137872/ENSG00000122707/ENSG00000138685/ENSG00000140416/ENSG00000205336/ENSG00000081189/ENSG00000166780/ENSG00000112175/ENSG00000156234/ENSG00000145147/ENSG00000166333/ENSG00000187391/ENSG00000111863/ENSG00000185532/ENSG00000185885/ENSG00000144824/ENSG00000136826/ENSG00000109819…	SFRP1/PTN/MYOCD/CXCL12/MMP28/CITED2/BCL2/SEMA6D/RECK/FGF2/TPM1/ADGRG1/MEF2C/C16orf45/BMP5/CXCL13/SLIT2/ILK/MAGI2/ADTRP/PRKG1/IFITM1/PHLDB2/KLF4/PPARGC1A/SEMA6A/PADI2/SYNJ2BP/SEMA3G/TP53INP1/TRIM27/GCSAM/TIMP1/CCL21/PTGER4/MITF/VCL/DPEP1/NOV/RIPOR2/PBLD/WASL/CCL28/C5orf30/DCN/ACVRL1/EPHA1/WNT3/AIF1/TRIM28/NDRG4/CLIC4/PLXNA3/PTPRM/MCC/DLC1/PTPRR/TMIGD3/MAPK15/CYP1B1/GSTP1/SRGAP2C/MIIP/SHH/DACH1/NRG…	GO_BP
54	GO:0098656~anion transmembrane transport	71	71/2709	286/18012	8.94226e-06	0.000574702	1.65061	ENSG00000142959/ENSG00000080493/ENSG00000181804/ENSG00000016602/ENSG00000131389/ENSG00000076555/ENSG00000065600/ENSG00000039987/ENSG00000116741/ENSG00000103257/ENSG00000162409/ENSG00000155962/ENSG00000138074/ENSG00000165457/ENSG00000123643/ENSG00000187730/ENSG00000136295/ENSG00000118596/ENSG00000168003/ENSG00000157184/ENSG00000178537/ENSG00000134917/ENSG00000115616/ENSG00000060762/ENSG00000155850…	BEST4/SLC4A4/SLC9A9/CLCA4/SLC6A6/ACACB/TMEM206/BEST2/RGS2/SLC7A5/PRKAA2/CLIC2/SLC5A6/FOLR2/SLC36A1/GABRD/TTYH3/SLC16A7/SLC3A2/CPT2/SLC25A20/ADAMTS8/SLC9A2/MPC1/SLC26A2/SLC12A8/SLC35C2/LRRC8E/SLC7A6/SLC1A5/SLC35D1/SLC35A1/SLC25A22/SLC7A2/SLC19A1/SLC26A3/ABCC1/CLIC5/SLC12A9/ANO9/CLCA1/SLC7A1/STRA6/GABRE/SLC35A3/PRNP/SLC37A2/CLIC4/CLIC6/LRRC8C/AGT/SLC4A11/SLC12A2/TTYH2/ABCA1/SLC7A11/SLC1A1/PDPN/SLC9…	GO_BP
55	GO:0016485~protein processing	67	67/2709	266/18012	9.49154e-06	0.000603778	1.67474	ENSG00000163815/ENSG00000112936/ENSG00000135678/ENSG00000115590/ENSG00000099139/ENSG00000106571/ENSG00000188906/ENSG00000101294/ENSG00000148180/ENSG00000121898/ENSG00000163751/ENSG00000104312/ENSG00000000971/ENSG00000120885/ENSG00000142875/ENSG00000126759/ENSG00000160613/ENSG00000166278/ENSG00000116209/ENSG00000145506/ENSG00000107738/ENSG00000112208/ENSG00000180447/ENSG00000262655/ENSG00000196236…	CLEC3B/C7/CPM/IL1R2/PCSK5/GLI3/LRRK2/HM13/GSN/CPXM2/CPA3/RIPK2/CFH/CLU/PRKACB/CFP/PCSK7/C2/TMEM59/NKD2/VSIR/BAG2/GAS1/SPON1/XPNPEP3/PERP/KLK6/CAPN2/VSIG4/PRNP/CTSS/PLAU/OGT/P2RX7/KLK1/CPXM1/DYNC2H1/SHH/PCSK9/ECE2/ERO1B/CTSE/CFB/CHAC1/A2M/C8G/BCL2L12/SCG5/LDLRAD3/TMPRSS2/CORIN/SRGN/BACE2/BIRC3/C1QA/COMP/ADAMTS2/MMP14/MELTF/PROS1/SERPINE1/CES1/MMP16/C4BPB/F12/SERPINF2/SERPINE2	GO_BP
56	GO:0070663~regulation of leukocyte proliferation	58	58/2709	221/18012	9.93223e-06	0.000613045	1.74497	ENSG00000160712/ENSG00000138735/ENSG00000171791/ENSG00000012124/ENSG00000172724/ENSG00000158473/ENSG00000081189/ENSG00000169508/ENSG00000134352/ENSG00000196950/ENSG00000049130/ENSG00000010671/ENSG00000090659/ENSG00000104312/ENSG00000114455/ENSG00000121807/ENSG00000072694/ENSG00000170476/ENSG00000171916/ENSG00000152804/ENSG00000159958/ENSG00000107738/ENSG00000172216/ENSG00000123338/ENSG00000170298…	IL6R/PDE5A/BCL2/CD22/CCL19/CD1D/MEF2C/GPR183/IL6ST/SLC39A10/KITLG/BTK/CD209/RIPK2/HHLA2/CCR2/FCGR2B/MZB1/LGALS9C/HHEX/TNFRSF13C/VSIR/CEBPB/NCKAP1L/LGALS9B/AIF1/VSIG4/PRNP/ZP3/LGALS3/PTPRC/BST1/GSTP1/SHH/IL23A/IKZF3/CD28/SASH3/TNFSF13B/CCL5/VCAM1/ARG2/CDKN1A/EBI3/HLA-DMB/CD4/MIF/BMP4/GPNMB/CD38/CD3E/CD86/FOXP3/HLA-DPB1/HLA-DPA1/ENPP3/INPP5D/TNFRSF4	GO_BP
57	GO:0042326~negative regulation of phosphorylation	102	102/2709	453/18012	1.24453e-05	0.000716376	1.49711	ENSG00000135549/ENSG00000104332/ENSG00000048540/ENSG00000005249/ENSG00000135842/ENSG00000141052/ENSG00000113448/ENSG00000114166/ENSG00000147883/ENSG00000105974/ENSG00000090447/ENSG00000198668/ENSG00000116741/ENSG00000129474/ENSG00000164850/ENSG00000150593/ENSG00000154277/ENSG00000188906/ENSG00000198947/ENSG00000197852/ENSG00000145147/ENSG00000166333/ENSG00000101255/ENSG00000162407/ENSG00000152642…	PKIB/SFRP1/LMO3/PRKAR2B/FAM129A/MYOCD/PDE4D/KAT2B/CDKN2B/CAV1/TFAP4/CALM1/RGS2/AJUBA/GPER1/PDCD4/UCHL1/LRRK2/DMD/FAM212B/SLIT2/ILK/TRIB3/PLPP3/GPD1L/MYC/PINK1/ANGPT1/SMPD1/KLF4/PPARGC1A/SEMA6A/CDK5RAP1/NDRG2/SYNJ2BP/TRIM27/WWTR1/F2RL1/SPRY4/RASSF2/PER1/PBLD/KLHL31/GNAQ/BDKRB1/HHEX/PID1/TESC/PRKN/XDH/PLK1/INHBA/ARRB1/FOXM1/DUSP19/BDKRB2/GSKIP/EPHA1/APC/PMEPA1/MLXIPL/CBFA2T3/PRNP/DUSP14/PTPRC/PKIA/…	GO_BP
58	GO:0051783~regulation of nuclear division	51	51/2709	188/18012	1.25257e-05	0.000716376	1.8037	ENSG00000079335/ENSG00000175063/ENSG00000124205/ENSG00000174808/ENSG00000255112/ENSG00000119541/ENSG00000071539/ENSG00000172572/ENSG00000087586/ENSG00000011426/ENSG00000135476/ENSG00000164114/ENSG00000175662/ENSG00000146670/ENSG00000166851/ENSG00000169679/ENSG00000105971/ENSG00000180198/ENSG00000127564/ENSG00000117650/ENSG00000134982/ENSG00000094804/ENSG00000167513/ENSG00000184445/ENSG00000172167…	CDC14A/UBE2C/EDN3/BTC/CHMP1B/VPS4B/TRIP13/PDE3A/AURKA/ANLN/ESPL1/MAP9/TOM1L2/CDCA5/PLK1/BUB1/CAV2/RCC1/PKMYT1/NEK2/APC/CDC6/CDT1/KNTC1/MTBP/NAA10/LIF/CDC25C/BORA/MAPK15/CDC20/CCNB1/PTTG1/CENPF/TTK/CD28/MSX1/MAD2L1/MAD2L2/MKI67/BUB1B/GPR3/AURKB/CHMP4C/DUSP1/HSPA1B/SMPD3/BMP4/CENPE/WNT5A/MSX2	GO_BP
59	GO:0015711~organic anion transport	107	107/2709	481/18012	1.34317e-05	0.000747619	1.47908	ENSG00000139433/ENSG00000133742/ENSG00000080493/ENSG00000186198/ENSG00000135218/ENSG00000104267/ENSG00000131389/ENSG00000076555/ENSG00000220205/ENSG00000146039/ENSG00000116741/ENSG00000103257/ENSG00000162409/ENSG00000125648/ENSG00000167434/ENSG00000138074/ENSG00000165457/ENSG00000123643/ENSG00000187134/ENSG00000101187/ENSG00000165449/ENSG00000151729/ENSG00000118596/ENSG00000168003/ENSG00000068650…	GLTP/CA1/SLC4A4/SLC51B/CD36/CA2/SLC6A6/ACACB/VAMP2/SLC17A4/RGS2/SLC7A5/PRKAA2/SLC25A23/CA4/SLC5A6/FOLR2/SLC36A1/AKR1C1/SLCO4A1/SLC16A9/SLC25A4/SLC16A7/SLC3A2/ATP11A/CPT2/SLC25A20/TNFAIP8L3/MPC1/ATP8B1/SLC26A2/NCOA1/SLC13A2/HBB/SLC35C2/LRRC8E/ABCD3/SLC7A6/SLC1A5/SLC35D1/SLC35A1/SCP2/SLC17A5/SLC52A2/SLC25A22/SLC7A2/CA12/SLC19A1/APBA1/ATP8B4/SLC26A3/ABCC1/PLEKHA8P1/SLC22A11/TMEM30B/SCARB1/BDKRB2/SLC…	GO_BP
60	GO:0071887~leukocyte apoptotic process	33	33/2709	104/18012	1.36295e-05	0.000751914	2.10976	ENSG00000107562/ENSG00000172724/ENSG00000106571/ENSG00000081189/ENSG00000171115/ENSG00000196950/ENSG00000049130/ENSG00000139193/ENSG00000010671/ENSG00000143772/ENSG00000137077/ENSG00000142867/ENSG00000215417/ENSG00000144161/ENSG00000126353/ENSG00000157514/ENSG00000131981/ENSG00000089041/ENSG00000167601/ENSG00000119508/ENSG00000171608/ENSG00000180353/ENSG00000151012/ENSG00000107099/ENSG00000178999…	CXCL12/CCL19/GLI3/MEF2C/GIMAP8/SLC39A10/KITLG/CD27/BTK/ITPKB/CCL21/BCL10/MIR17HG/ZC3H8/CCR7/TSC22D3/LGALS3/P2RX7/AXL/NR4A3/PIK3CD/HCLS1/SLC7A11/DOCK8/AURKB/CCL5/ARG2/NOD2/CD3G/MIF/BMP4/CDKN2A/WNT5A	GO_BP
61	GO:0003018~vascular process in circulatory system	47	47/2709	170/18012	1.58119e-05	0.000842491	1.83824	ENSG00000186642/ENSG00000075073/ENSG00000145936/ENSG00000169860/ENSG00000156113/ENSG00000100604/ENSG00000105974/ENSG00000116741/ENSG00000183023/ENSG00000164850/ENSG00000112715/ENSG00000124205/ENSG00000146469/ENSG00000169418/ENSG00000145147/ENSG00000185532/ENSG00000172572/ENSG00000154188/ENSG00000108405/ENSG00000106397/ENSG00000165895/ENSG00000120156/ENSG00000131016/ENSG00000164251/ENSG00000244734…	PDE2A/TACR2/KCNMB1/P2RY1/KCNMA1/CHGA/CAV1/RGS2/SLC8A1/GPER1/VEGFA/EDN3/VIP/NPR1/SLIT2/PRKG1/PDE3A/ANGPT1/P2RX1/PLOD3/ARHGAP42/TEK/AKAP12/F2RL1/HBB/BMP6/OXTR/APLN/GUCY1A3/EDNRB/ATP2B1/EPHX2/BDKRB2/PTPRM/AGT/PTP4A3/C2CD4A/ACTA2/CEACAM1/HMOX1/HTR1D/COMP/TRPV4/CD38/EDNRA/SERPINF2/ADRA2A	GO_BP
62	GO:0072511~divalent inorganic cation transport	107	107/2709	483/18012	1.62076e-05	0.000849059	1.47296	ENSG00000087258/ENSG00000186642/ENSG00000145362/ENSG00000166501/ENSG00000198523/ENSG00000107562/ENSG00000119121/ENSG00000151320/ENSG00000113448/ENSG00000149596/ENSG00000104723/ENSG00000171791/ENSG00000104154/ENSG00000153956/ENSG00000138193/ENSG00000105974/ENSG00000173198/ENSG00000213366/ENSG00000198668/ENSG00000065534/ENSG00000138685/ENSG00000172724/ENSG00000183023/ENSG00000164850/ENSG00000172349…	GNAO1/PDE2A/ANK2/PRKCB/PLN/CXCL12/TRPM6/AKAP6/PDE4D/JPH2/TUSC3/BCL2/SLC30A4/CACNA2D1/PLCE1/CAV1/CYSLTR1/GSTM2/CALM1/MYLK/FGF2/CCL19/SLC8A1/GPER1/IL16/CNNM2/SLC25A23/DMD/CLIC2/ITPR1/PIK3CG/ATP2B4/TCN2/CEMIP/SLC3A2/SLC39A10/CAMK2G/PLCG2/P2RX1/CYP27B1/HSPA2/GRIN2D/AHNAK/CACNB2/SLC41A2/TRIM27/CCL21/TMEM37/CAMK2D/TRPC1/CACNA1H/TRPC6/MCOLN2/SLC35G1/PLCG1/LIME1/BDKRB1/ATP2B1/SRI/MYO5A/NIPAL1/CCR7/GRIN2B…	GO_BP
63	GO:0050853~B cell receptor signaling pathway	22	22/2709	58/18012	1.66694e-05	0.000851777	2.52201	ENSG00000166501/ENSG00000154822/ENSG00000171791/ENSG00000012124/ENSG00000007312/ENSG00000081189/ENSG00000105369/ENSG00000159216/ENSG00000196950/ENSG00000197943/ENSG00000010671/ENSG00000174500/ENSG00000072694/ENSG00000172578/ENSG00000203896/ENSG00000067955/ENSG00000123338/ENSG00000254709/ENSG00000081237/ENSG00000171608/ENSG00000113263/ENSG00000004468	PRKCB/PLCL2/BCL2/CD22/CD79B/MEF2C/CD79A/RUNX1/SLC39A10/PLCG2/BTK/GCSAM/FCGR2B/KLHL6/LIME1/CBFB/NCKAP1L/IGLL5/PTPRC/PIK3CD/ITK/CD38	GO_BP
64	GO:0032609~interferon-gamma production	34	34/2709	110/18012	1.89709e-05	0.000946117	2.05513	ENSG00000160712/ENSG00000113448/ENSG00000164342/ENSG00000104312/ENSG00000204713/ENSG00000121807/ENSG00000196664/ENSG00000164251/ENSG00000171916/ENSG00000159958/ENSG00000107738/ENSG00000126353/ENSG00000170298/ENSG00000144381/ENSG00000122641/ENSG00000153283/ENSG00000171867/ENSG00000188372/ENSG00000167601/ENSG00000110944/ENSG00000170458/ENSG00000101916/ENSG00000122122/ENSG00000113263/ENSG00000105246…	IL6R/PDE4D/TLR3/RIPK2/TRIM27/CCR2/TLR7/F2RL1/LGALS9C/TNFRSF13C/VSIR/CCR7/LGALS9B/HSPD1/INHBA/CD96/PRNP/ZP3/AXL/IL23A/CD14/TLR8/SASH3/ITK/EBI3/IL1R1/SLC11A1/CD3E/RASGRP1/FOXP3/HLA-DPB1/HLA-DPA1/ZC3H12A/WNT5A	GO_BP
65	GO:0009410~response to xenobiotic stimulus	71	71/2709	293/18012	2.13834e-05	0.00102647	1.61118	ENSG00000087258/ENSG00000186642/ENSG00000112964/ENSG00000005249/ENSG00000197165/ENSG00000150471/ENSG00000095303/ENSG00000113580/ENSG00000048052/ENSG00000196620/ENSG00000213366/ENSG00000090447/ENSG00000242515/ENSG00000116741/ENSG00000183023/ENSG00000156804/ENSG00000163347/ENSG00000084774/ENSG00000156299/ENSG00000131471/ENSG00000187134/ENSG00000166311/ENSG00000109819/ENSG00000096384/ENSG00000171428…	GNAO1/PDE2A/GHR/PRKAR2B/SULT1A2/ADGRL3/PTGS1/NR3C1/HDAC9/UGT2B15/GSTM2/TFAP4/UGT1A10/RGS2/SLC8A1/FBXO32/CLDN1/CAD/TIAM1/AOC3/AKR1C1/SMPD1/PPARGC1A/HSP90AB1/NAT1/RGS10/SULT1A1/PRKACB/MCM7/E2F1/GSTM3/OXTR/DPEP1/ARNT2/SULT1B1/SDK1/MARC2/EPHX2/SRD5A1/NAT2/AIF1/PCK1/CES3/PTK2B/CYP2D7/CYP2S1/FOXO1/DNMT3B/RORA/DDIT4/TH/PDE1B/CES2/CYP1B1/GSTP1/CYP26B1/CMBL/ASIC1/FOSB/GSTM4/HOMER1/EIF4EBP1/MT-ND6/AQP1/AOC…	GO_BP
66	GO:0050878~regulation of body fluid levels	109	109/2709	497/18012	2.14054e-05	0.00102647	1.45822	ENSG00000138722/ENSG00000005249/ENSG00000166501/ENSG00000186469/ENSG00000173175/ENSG00000135218/ENSG00000169860/ENSG00000159176/ENSG00000105974/ENSG00000204936/ENSG00000069974/ENSG00000168447/ENSG00000078295/ENSG00000163347/ENSG00000084774/ENSG00000112715/ENSG00000150995/ENSG00000105851/ENSG00000146469/ENSG00000120833/ENSG00000169418/ENSG00000174808/ENSG00000120063/ENSG00000166333/ENSG00000124491…	MMRN1/PRKAR2B/PRKCB/GNG2/ADCY5/CD36/P2RY1/CSRP1/CAV1/CD177/RAB27A/SCNN1B/ADCY2/CLDN1/CAD/VEGFA/ITPR1/PIK3CG/VIP/SOCS2/NPR1/BTC/GNA13/ILK/F13A1/ADTRP/ZFPM2/PRKG1/PLCG2/P2RX1/MYL9/MET/FLI1/NCOA1/PRKACB/CCND1/F2RL1/F8/HBB/NME1/OXTR/PAFAH2/VCL/APLN/ADCY9/TRPC6/PAPSS2/GNAQ/PPAT/ITGB3/EDNRB/GRHL3/XDH/DOCK6/TFPI/GRHL1/ARRB1/SYTL2/GNA11/FLNA/PDGFRA/DGKZ/ADCY3/HPSE/PLAU/COL1A1/P2RX7/SLC22A4/AXL/NEURL1/VAV…	GO_BP
67	GO:0042445~hormone metabolic process	59	59/2709	232/18012	2.32433e-05	0.00109575	1.6909	ENSG00000196616/ENSG00000112964/ENSG00000135437/ENSG00000086696/ENSG00000099139/ENSG00000073737/ENSG00000042445/ENSG00000025423/ENSG00000248144/ENSG00000112175/ENSG00000187134/ENSG00000198074/ENSG00000176928/ENSG00000125845/ENSG00000109819/ENSG00000163751/ENSG00000111012/ENSG00000151632/ENSG00000062282/ENSG00000196502/ENSG00000104324/ENSG00000153162/ENSG00000160613/ENSG00000196557/ENSG00000278535…	ADH1B/GHR/RDH5/HSD17B2/PCSK5/DHRS9/RETSAT/HSD17B6/ADH1C/BMP5/AKR1C1/AKR1B10/GCNT4/BMP2/PPARGC1A/CPA3/CYP27B1/AKR1C2/DGAT2/SULT1A1/CPQ/BMP6/PCSK7/CACNA1H/DHRS11/SULT1B1/SRD5A1/SCARB1/ADH6/DHCR7/PDGFRA/HSD17B11/KLK6/FGFR1/CYP2S1/STC2/CYP1B1/COMT/CYP26B1/SHH/TG/HSD11B2/ECE2/ERO1B/ALDH1A1/UGT2B7/SCG5/CORIN/GFI1/ACHE/BACE2/CRYM/SLC44A4/DHRS2/DIO2/FOXA1/SELENOM/CES1/ALDH1A2	GO_BP
68	GO:0071236~cellular response to antibiotic	40	40/2709	139/18012	2.42098e-05	0.00110163	1.91337	ENSG00000145936/ENSG00000173175/ENSG00000141570/ENSG00000170962/ENSG00000163516/ENSG00000078295/ENSG00000183010/ENSG00000188906/ENSG00000081189/ENSG00000184349/ENSG00000158828/ENSG00000127955/ENSG00000136826/ENSG00000164938/ENSG00000105976/ENSG00000120885/ENSG00000106462/ENSG00000126602/ENSG00000137672/ENSG00000013573/ENSG00000147955/ENSG00000138031/ENSG00000114346/ENSG00000150907/ENSG00000167601…	KCNMB1/ADCY5/CBX8/PDGFD/ANKZF1/ADCY2/PYCR1/LRRK2/MEF2C/EFNA5/PINK1/GNAI1/KLF4/TP53INP1/MET/CLU/EZH2/TRAP1/TRPC6/DDX11/SIGMAR1/ADCY3/ECT2/FOXO1/AXL/NR4A3/CYP1B1/PLA2G4A/GPR37L1/CDK1/SMPD3/KLF2/LCN2/FABP1/CRIP1/AQP1/CYBB/NQO1/TRPM2/ZC3H12A	GO_BP
69	GO:0032649~regulation of interferon-gamma production	31	31/2709	98/18012	2.62956e-05	0.00115441	2.10324	ENSG00000160712/ENSG00000113448/ENSG00000164342/ENSG00000104312/ENSG00000121807/ENSG00000196664/ENSG00000171916/ENSG00000159958/ENSG00000107738/ENSG00000126353/ENSG00000170298/ENSG00000144381/ENSG00000122641/ENSG00000153283/ENSG00000171867/ENSG00000188372/ENSG00000167601/ENSG00000110944/ENSG00000170458/ENSG00000101916/ENSG00000122122/ENSG00000105246/ENSG00000115594/ENSG00000018280/ENSG00000198851…	IL6R/PDE4D/TLR3/RIPK2/CCR2/TLR7/LGALS9C/TNFRSF13C/VSIR/CCR7/LGALS9B/HSPD1/INHBA/CD96/PRNP/ZP3/AXL/IL23A/CD14/TLR8/SASH3/EBI3/IL1R1/SLC11A1/CD3E/RASGRP1/FOXP3/HLA-DPB1/HLA-DPA1/ZC3H12A/WNT5A	GO_BP
70	GO:0010463~mesenchymal cell proliferation	18	18/2709	44/18012	2.93759e-05	0.00123736	2.72002	ENSG00000105894/ENSG00000125398/ENSG00000128573/ENSG00000066468/ENSG00000112715/ENSG00000148516/ENSG00000105989/ENSG00000140285/ENSG00000136997/ENSG00000125845/ENSG00000103241/ENSG00000196159/ENSG00000077782/ENSG00000164690/ENSG00000163132/ENSG00000125378/ENSG00000147257/ENSG00000114251	PTN/SOX9/FOXP2/FGFR2/VEGFA/ZEB1/WNT2/FGF7/MYC/BMP2/FOXF1/FAT4/FGFR1/SHH/MSX1/BMP4/GPC3/WNT5A	GO_BP
71	GO:1902105~regulation of leukocyte differentiation	66	66/2709	270/18012	3.06883e-05	0.00128396	1.6253	ENSG00000104332/ENSG00000127951/ENSG00000104267/ENSG00000108773/ENSG00000152495/ENSG00000172724/ENSG00000106571/ENSG00000133710/ENSG00000164342/ENSG00000198846/ENSG00000137265/ENSG00000148516/ENSG00000185862/ENSG00000159216/ENSG00000049130/ENSG00000136997/ENSG00000139193/ENSG00000010671/ENSG00000143772/ENSG00000155846/ENSG00000104312/ENSG00000121807/ENSG00000072694/ENSG00000187098/ENSG00000239672…	SFRP1/FGL2/CA2/KAT2A/CAMK4/CCL19/GLI3/SPINK5/TLR3/TOX/IRF4/ZEB1/EVI2B/RUNX1/KITLG/MYC/CD27/BTK/ITPKB/PPARGC1B/RIPK2/CCR2/FCGR2B/MITF/NME1/RASSF2/MIR17HG/VSIR/TESC/CEBPB/ZC3H8/FANCA/CBFB/NCKAP1L/TAL1/LRRC17/INHBA/ROR2/KLF10/HMGB3/ID2/PTPRC/AXL/LIF/LTF/CYP26B1/SHH/HCLS1/IL23A/IKZF3/HLA-DOA/LEF1/CD28/HLX/NLRP3/SASH3/CEACAM1/CD4/BMP4/MMP14/DTX1/CD86/RASGRP1/FOXP3/INPP5D/ZC3H12A	GO_BP
72	GO:0070371~ERK1 and ERK2 cascade	73	73/2709	308/18012	3.63479e-05	0.00147138	1.57589	ENSG00000111846/ENSG00000048540/ENSG00000135218/ENSG00000122694/ENSG00000169860/ENSG00000116473/ENSG00000125398/ENSG00000170962/ENSG00000138685/ENSG00000172724/ENSG00000164850/ENSG00000066468/ENSG00000156299/ENSG00000169508/ENSG00000156642/ENSG00000183856/ENSG00000136997/ENSG00000125845/ENSG00000154188/ENSG00000136826/ENSG00000092421/ENSG00000183578/ENSG00000165795/ENSG00000213463/ENSG00000104312…	GCNT2/LMO3/CD36/GLIPR2/P2RY1/RAP1A/SOX9/PDGFD/FGF2/CCL19/GPER1/FGFR2/TIAM1/GPR183/NPTN/IQGAP3/MYC/BMP2/ANGPT1/KLF4/SEMA6A/TNFAIP8L3/NDRG2/SYNJ2BP/RIPK2/KIT/CCL21/TEK/PTGER4/AKAP12/F2RL1/CCL15/SPRY4/OXTR/FFAR4/CD44/CCR7/ARRB1/FGF19/PDGFRA/SCIMP/FGFR4/NDRG4/PTK2B/PTPRC/CHI3L1/AGT/FGF18/PTPRR/LIF/GSTP1/TNFRSF11A/ALKAL1/EPHB2/CSF1R/CEACAM1/CCL5/DUSP1/NOD2/SLAMF1/FBLN1/ATF3/CD4/TRPV4/MIF/BMP4/GPNMB/CC…	GO_BP
73	GO:0050918~positive chemotaxis	24	24/2709	69/18012	3.76588e-05	0.00151461	2.31268	ENSG00000107562/ENSG00000171951/ENSG00000138685/ENSG00000172349/ENSG00000112715/ENSG00000140285/ENSG00000154188/ENSG00000105976/ENSG00000164251/ENSG00000275718/ENSG00000170989/ENSG00000131981/ENSG00000154134/ENSG00000180900/ENSG00000164171/ENSG00000091879/ENSG00000271503/ENSG00000119630/ENSG00000240972/ENSG00000125378/ENSG00000136235/ENSG00000169429/ENSG00000114251/ENSG00000198753	CXCL12/SCG2/FGF2/IL16/VEGFA/FGF7/ANGPT1/MET/F2RL1/CCL15/S1PR1/LGALS3/ROBO3/SCRIB/ITGA2/ANGPT2/CCL5/PGF/MIF/BMP4/GPNMB/CXCL8/WNT5A/PLXNB3	GO_BP
74	GO:0002577~regulation of antigen processing and presentation	11	2709-11-01	20/18012	3.91322e-05	0.00156378	3.65692	ENSG00000127951/ENSG00000172724/ENSG00000149658/ENSG00000137077/ENSG00000072694/ENSG00000126353/ENSG00000241106/ENSG00000015285/ENSG00000204252/ENSG00000167207/ENSG00000018280	FGL2/CCL19/YTHDF1/CCL21/FCGR2B/CCR7/HLA-DOB/WAS/HLA-DOA/NOD2/SLC11A1	GO_BP
75	GO:0006979~response to oxidative stress	97	97/2709	438/18012	4.01296e-05	0.00159343	1.47248	ENSG00000087258/ENSG00000171503/ENSG00000135218/ENSG00000095303/ENSG00000171791/ENSG00000141570/ENSG00000170962/ENSG00000172724/ENSG00000183023/ENSG00000109846/ENSG00000163516/ENSG00000183010/ENSG00000162409/ENSG00000140416/ENSG00000188906/ENSG00000174099/ENSG00000117592/ENSG00000137449/ENSG00000211445/ENSG00000158828/ENSG00000136826/ENSG00000109819/ENSG00000010671/ENSG00000155846/ENSG00000168077…	GNAO1/ETFDH/CD36/PTGS1/BCL2/CBX8/PDGFD/CCL19/SLC8A1/CRYAB/ANKZF1/PYCR1/PRKAA2/TPM1/LRRK2/MSRB3/PRDX6/CPEB2/GPX3/PINK1/KLF4/PPARGC1A/BTK/PPARGC1B/SCARA3/TP53INP1/MET/HBB/SELENOP/EZH2/TRAP1/DPEP1/TMEM161A/TRPC6/AGAP3/PPP2CB/PRKN/PYROXD1/MB/SIGMAR1/CCR7/TRAF2/GSKIP/DAPK1/PDGFRA/AIF1/CAPN2/PRNP/ECT2/PTK2B/COL1A1/TXNIP/FKBP1B/FOXO1/STC2/MELK/PTPRN/TLR6/AXL/HBA2/SLC25A24/FER/NR4A3/CYP1B1/GSTP1/FOSL1/FB…	GO_BP
76	GO:0051235~maintenance of location	76	76/2709	325/18012	4.12585e-05	0.00161113	1.55483	ENSG00000145362/ENSG00000198523/ENSG00000135218/ENSG00000176438/ENSG00000151320/ENSG00000113448/ENSG00000149596/ENSG00000082397/ENSG00000076555/ENSG00000104154/ENSG00000138193/ENSG00000105974/ENSG00000213366/ENSG00000198668/ENSG00000119950/ENSG00000138685/ENSG00000172724/ENSG00000183023/ENSG00000164850/ENSG00000125648/ENSG00000198947/ENSG00000155962/ENSG00000150995/ENSG00000148180/ENSG00000103888…	ANK2/PLN/CD36/SYNE3/AKAP6/PDE4D/JPH2/EPB41L3/ACACB/SLC30A4/PLCE1/CAV1/GSTM2/CALM1/MXI1/FGF2/CCL19/SLC8A1/GPER1/SLC25A23/DMD/CLIC2/ITPR1/GSN/CEMIP/HILPDA/DZIP1/ANK3/SYNE1/PINK1/PLCG2/MEST/MDFI/DGAT2/CCL21/CAMK2D/TRPC1/MCOLN2/SCIN/PLCG1/LIME1/BDKRB1/ITGB3/RANGAP1/TONSL/SRI/MYO5A/NRIP1/CCR7/CLMN/SCARB1/FLNA/PLA2G10/PTK2B/PTPRC/FKBP1B/P2RX7/SQLE/CHD7/JPH1/ABCA1/GPSM2/AKAP9/ACVR1C/SRGN/TRPA1/ASPM/LCN2…	GO_BP
77	GO:0032103~positive regulation of response to external stimulus	74	74/2709	315/18012	4.40936e-05	0.00167609	1.56198	ENSG00000186642/ENSG00000105894/ENSG00000198121/ENSG00000160712/ENSG00000107562/ENSG00000171951/ENSG00000170962/ENSG00000138685/ENSG00000172724/ENSG00000172349/ENSG00000150593/ENSG00000188906/ENSG00000112715/ENSG00000105851/ENSG00000164342/ENSG00000124205/ENSG00000156299/ENSG00000156234/ENSG00000145147/ENSG00000134352/ENSG00000113296/ENSG00000111012/ENSG00000010671/ENSG00000104312/ENSG00000121807…	PDE2A/PTN/LPAR1/IL6R/CXCL12/SCG2/PDGFD/FGF2/CCL19/IL16/PDCD4/LRRK2/VEGFA/PIK3CG/TLR3/EDN3/TIAM1/CXCL13/SLIT2/IL6ST/THBS4/CYP27B1/BTK/RIPK2/CCR2/CCL21/MET/PTGER4/TLR7/F2RL1/BMP6/SASH1/RIPOR2/PTGER3/CD180/CEBPB/ABCC1/NCKAP1L/CCR7/LY86/LY96/S1PR1/AIF1/RARRES2/PTK2B/ZP3/CMKLR1/FGFR1/FKBP1B/AGT/FGF18/TLR6/C2CD4A/DDX60/IL23A/TNFRSF11A/CD28/ITGA2/CCL5/PGF/NOD2/WISP1/TRPV4/MIF/IL17RB/CXCL8/SERPINE1/CAMK1…	GO_BP
78	GO:0090066~regulation of anatomical structure size	108	108/2709	500/18012	4.54793e-05	0.00171829	1.43617	ENSG00000165410/ENSG00000065320/ENSG00000145936/ENSG00000107562/ENSG00000169860/ENSG00000156113/ENSG00000100604/ENSG00000137872/ENSG00000163431/ENSG00000105974/ENSG00000116741/ENSG00000183023/ENSG00000164850/ENSG00000133104/ENSG00000188906/ENSG00000130558/ENSG00000112715/ENSG00000124205/ENSG00000146469/ENSG00000169418/ENSG00000173898/ENSG00000145147/ENSG00000166333/ENSG00000148180/ENSG00000169213…	CFL2/NTN1/KCNMB1/CXCL12/P2RY1/KCNMA1/CHGA/SEMA6D/LMOD1/CAV1/RGS2/SLC8A1/GPER1/SPART/LRRK2/OLFM1/VEGFA/EDN3/VIP/NPR1/SPTBN2/SLIT2/ILK/GSN/RAB3B/PRKG1/IQGAP3/EFNA5/P2RX1/KIAA1211/SEMA6A/HSP90AB1/ACTR3B/PLOD3/SEMA3G/ARHGAP42/SLC12A8/TRIM27/ARHGAP28/TNFRSF12A/CCL21/LIMK1/TMOD2/F2RL1/HBB/OXTR/LIMA1/APLN/GUCY1A3/RILP/SCIN/FGF13/WASL/MAP1B/EDNRB/ATP2B1/AKT3/EPHX2/NCKAP1L/RET/CCR7/SLC12A9/CDK4/PLS1/IQGAP…	GO_BP
79	GO:0010971~positive regulation of G2/M transition of mitotic cell cycle	13	13/2709	27/18012	4.90539e-05	0.00183115	3.20135	ENSG00000101224/ENSG00000119541/ENSG00000126803/ENSG00000110092/ENSG00000161692/ENSG00000185630/ENSG00000135446/ENSG00000082014/ENSG00000143476/ENSG00000158402/ENSG00000134057/ENSG00000170312/ENSG00000164045	CDC25B/VPS4B/HSPA2/CCND1/DBF4B/PBX1/CDK4/SMARCD3/DTL/CDC25C/CCNB1/CDK1/CDC25A	GO_BP
80	GO:0032355~response to estradiol	38	38/2709	134/18012	5.43303e-05	0.00199233	1.88552	ENSG00000104332/ENSG00000105894/ENSG00000164850/ENSG00000109846/ENSG00000164120/ENSG00000120833/ENSG00000109819/ENSG00000129473/ENSG00000084676/ENSG00000110092/ENSG00000106462/ENSG00000180914/ENSG00000172379/ENSG00000131711/ENSG00000180530/ENSG00000183779/ENSG00000103175/ENSG00000003436/ENSG00000145545/ENSG00000122420/ENSG00000139874/ENSG00000108821/ENSG00000265972/ENSG00000088305/ENSG00000135744…	SFRP1/PTN/GPER1/CRYAB/HPGD/SOCS2/PPARGC1A/BCL2L2/NCOA1/CCND1/EZH2/OXTR/ARNT2/MAP1B/NRIP1/ZNF703/WFDC1/TFPI/SRD5A1/PTGFR/SSTR1/COL1A1/TXNIP/DNMT3B/AGT/TH/GSTP1/KIF18A/ITGA2/RUVBL2/DUSP1/CD4/CD38/KCNJ11/FOXA1/NQO1/ALDH1A2/MSX2	GO_BP
81	GO:1903317~regulation of protein maturation	35	35/2709	120/18012	5.60653e-05	0.0020203	1.93928	ENSG00000163815/ENSG00000112936/ENSG00000115590/ENSG00000124766/ENSG00000188906/ENSG00000148180/ENSG00000000971/ENSG00000120885/ENSG00000142875/ENSG00000126759/ENSG00000166278/ENSG00000116209/ENSG00000145506/ENSG00000112208/ENSG00000180447/ENSG00000106327/ENSG00000262655/ENSG00000155659/ENSG00000171867/ENSG00000243649/ENSG00000128965/ENSG00000175899/ENSG00000176919/ENSG00000126453/ENSG00000179241…	CLEC3B/C7/IL1R2/SOX4/LRRK2/GSN/CFH/CLU/PRKACB/CFP/C2/TMEM59/NKD2/BAG2/GAS1/TFR2/SPON1/VSIG4/PRNP/CFB/CHAC1/A2M/C8G/BCL2L12/LDLRAD3/BIRC3/C1QA/MMP14/MELTF/PROS1/SERPINE1/C4BPB/F12/SERPINF2/SERPINE2	GO_BP
82	GO:0042692~muscle cell differentiation	84	84/2709	371/18012	5.73281e-05	0.00205393	1.50542	ENSG00000101605/ENSG00000145362/ENSG00000121577/ENSG00000166831/ENSG00000165410/ENSG00000112276/ENSG00000141052/ENSG00000154330/ENSG00000151320/ENSG00000159176/ENSG00000171791/ENSG00000048052/ENSG00000072195/ENSG00000061455/ENSG00000108773/ENSG00000163431/ENSG00000078114/ENSG00000125398/ENSG00000116741/ENSG00000183023/ENSG00000164850/ENSG00000150593/ENSG00000066468/ENSG00000140416/ENSG00000154277…	MYOM1/ANK2/POPDC2/RBPMS2/CFL2/BVES/MYOCD/PGM5/AKAP6/CSRP1/BCL2/HDAC9/SPEG/PRDM6/KAT2A/LMOD1/NEBL/SOX9/RGS2/SLC8A1/GPER1/PDCD4/FGFR2/TPM1/UCHL1/DMD/MEF2C/VEGFA/SORBS2/ZEB1/FLNC/CDON/SYNE1/MYH11/SGCB/BMP2/PLEKHO1/KIT/ITGA8/TMOD2/BARX2/EZH2/CACNA1H/TCF3/NOV/RIPOR2/BOC/DMPK/FOXF1/EDNRB/PLPP7/GDF15/CAV2/CAPN9/NFATC1/PDGFRA/BHLHE41/QKI/CAPN2/SGCD/SMARCD3/AGT/RORA/CCNB1/CYP26B1/EHD2/SHH/NRG1/MSX1/NEK5/H…	GO_BP
83	GO:0015893~drug transport	54	54/2709	214/18012	6.32619e-05	0.00219864	1.67777	ENSG00000075073/ENSG00000107562/ENSG00000104267/ENSG00000173267/ENSG00000116741/ENSG00000103257/ENSG00000163347/ENSG00000125648/ENSG00000138074/ENSG00000165457/ENSG00000185339/ENSG00000123643/ENSG00000151729/ENSG00000169213/ENSG00000136997/ENSG00000158828/ENSG00000081923/ENSG00000197375/ENSG00000244734/ENSG00000105281/ENSG00000185803/ENSG00000174804/ENSG00000177542/ENSG00000003989/ENSG00000173638…	TACR2/CXCL12/CA2/SNCG/RGS2/SLC7A5/CLDN1/SLC25A23/SLC5A6/FOLR2/TCN2/SLC36A1/SLC25A4/RAB3B/MYC/PINK1/ATP8B1/SLC22A5/HBB/SLC1A5/SLC52A2/FZD4/SLC25A22/SLC7A2/SLC19A1/PRKN/MB/SYT11/ABCC1/INHBA/SLC7A1/STRA6/MFSD10/SYT7/AGT/HBA2/SLC25A24/MAPK15/SLC4A11/SLC22A3/SLC7A11/SLC1A1/TCN1/IPCEF1/SLC44A4/SYT1/AQP1/SLC11A1/SLC6A20/RGS4/SLC13A3/SYT13/SLC38A5/ABCC2	GO_BP
84	GO:1901655~cellular response to ketone	29	29/2709	93/18012	6.33116e-05	0.00219864	2.07333	ENSG00000104332/ENSG00000186469/ENSG00000173175/ENSG00000113580/ENSG00000090447/ENSG00000078295/ENSG00000162409/ENSG00000119138/ENSG00000156804/ENSG00000184349/ENSG00000127955/ENSG00000136826/ENSG00000151632/ENSG00000171522/ENSG00000070961/ENSG00000145545/ENSG00000135446/ENSG00000122420/ENSG00000124253/ENSG00000138031/ENSG00000104814/ENSG00000150907/ENSG00000088305/ENSG00000168209/ENSG00000125384…	SFRP1/GNG2/ADCY5/NR3C1/TFAP4/ADCY2/PRKAA2/KLF9/FBXO32/EFNA5/GNAI1/KLF4/AKR1C2/PTGER4/ATP2B1/SRD5A1/CDK4/PTGFR/PCK1/ADCY3/MAP4K1/FOXO1/DNMT3B/DDIT4/PTGER2/EIF4EBP1/KLF2/AQP1/ABCC2	GO_BP
85	GO:0050731~positive regulation of peptidyl-tyrosine phosphorylation	49	49/2709	189/18012	6.54786e-05	0.00224282	1.7238	ENSG00000112964/ENSG00000160712/ENSG00000135218/ENSG00000112715/ENSG00000134352/ENSG00000113296/ENSG00000184349/ENSG00000049130/ENSG00000140285/ENSG00000154188/ENSG00000157193/ENSG00000104312/ENSG00000116106/ENSG00000157404/ENSG00000153162/ENSG00000146918/ENSG00000026508/ENSG00000259207/ENSG00000153064/ENSG00000136960/ENSG00000162367/ENSG00000171867/ENSG00000120899/ENSG00000081237/ENSG00000135744…	GHR/IL6R/CD36/VEGFA/IL6ST/THBS4/EFNA5/KITLG/FGF7/ANGPT1/LRP8/RIPK2/EPHA4/KIT/BMP6/NCAPG2/CD44/ITGB3/BANK1/ENPP2/TAL1/PRNP/PTK2B/PTPRC/AGT/IL11/NEURL1/LIF/HCLS1/IL23A/NRG1/NCF1/NEDD9/TNK2/ALKAL1/CSPG4/CSF1R/NTRK2/CCL5/CTF1/TDGF1/CASS4/CD4/MIF/CD3E/SRCIN1/OSM/NOX4/ADRA2A	GO_BP
86	GO:0046718~viral entry into host cell	35	35/2709	121/18012	6.762e-05	0.00230351	1.92325	ENSG00000149294/ENSG00000105974/ENSG00000163347/ENSG00000148180/ENSG00000166825/ENSG00000185885/ENSG00000090659/ENSG00000105281/ENSG00000185803/ENSG00000073008/ENSG00000259207/ENSG00000213186/ENSG00000260314/ENSG00000142089/ENSG00000073060/ENSG00000105971/ENSG00000085265/ENSG00000167601/ENSG00000258227/ENSG00000139626/ENSG00000164171/ENSG00000204388/ENSG00000184012/ENSG00000170312/ENSG00000117090…	NCAM1/CAV1/CLDN1/GSN/ANPEP/IFITM1/CD209/SLC1A5/SLC52A2/PVR/ITGB3/TRIM59/MRC1/IFITM3/SCARB1/CAV2/FCN1/AXL/CLEC5A/ITGB7/ITGA2/HSPA1B/TMPRSS2/CDK1/SLAMF1/CLDN9/NECTIN4/CD4/MID2/HYAL3/CD86/IFITM2/HAVCR1/TNFRSF4/TYRO3	GO_BP
87	GO:0071216~cellular response to biotic stimulus	57	57/2709	231/18012	7.84031e-05	0.00255898	1.64065	ENSG00000135218/ENSG00000113448/ENSG00000150593/ENSG00000081189/ENSG00000156234/ENSG00000109819/ENSG00000010671/ENSG00000114698/ENSG00000104312/ENSG00000189067/ENSG00000072694/ENSG00000154920/ENSG00000153162/ENSG00000142867/ENSG00000111961/ENSG00000184216/ENSG00000136160/ENSG00000134061/ENSG00000172216/ENSG00000260314/ENSG00000112799/ENSG00000154589/ENSG00000003436/ENSG00000182195/ENSG00000135446…	CD36/PDE4D/PDCD4/MEF2C/CXCL13/PPARGC1A/BTK/PLSCR4/RIPK2/LITAF/FCGR2B/EME1/BMP6/BCL10/SASH1/IRAK1/EDNRB/CD180/CEBPB/MRC1/LY86/LY96/TFPI/LDOC1/CDK4/SCARB1/SBNO2/CAPN2/TLR1/TXNIP/CXCL3/TLR6/AXL/CXCL1/NR1D1/LTF/GSTP1/CD14/ABCA1/NLRP3/CCL5/GFI1/NOD2/IRAK2/CXCL2/LCN2/MIF/VIM/SPON2/CD86/CCL2/CXCL8/CXCL11/SERPINE1/ZC3H12A/WNT5A/ABCC2	GO_BP
88	GO:0022604~regulation of cell morphogenesis	104	104/2709	485/18012	8.42868e-05	0.00268084	1.42575	ENSG00000105894/ENSG00000065320/ENSG00000112276/ENSG00000198121/ENSG00000176438/ENSG00000160307/ENSG00000107562/ENSG00000169860/ENSG00000111962/ENSG00000082397/ENSG00000137872/ENSG00000115993/ENSG00000171533/ENSG00000140416/ENSG00000133104/ENSG00000132003/ENSG00000188906/ENSG00000130558/ENSG00000112715/ENSG00000099864/ENSG00000156299/ENSG00000149658/ENSG00000072163/ENSG00000145147/ENSG00000120063…	PTN/NTN1/BVES/LPAR1/SYNE3/S100B/CXCL12/P2RY1/UST/EPB41L3/SEMA6D/TRAK2/MAP6/TPM1/SPART/ZSWIM4/LRRK2/OLFM1/VEGFA/PALM/TIAM1/YTHDF1/LIMS2/SLIT2/GNA13/ILK/ARHGAP15/CPNE5/NEDD4L/EFNA5/ZSWIM6/ITGA7/ZEB2/PLEKHO1/SEMA6A/LRP8/PARVA/PLXNA1/FERMT2/SEMA3G/EPHA4/KIT/TNFRSF12A/LIMK1/ARHGAP44/NGFR/GPRASP2/RHOJ/RHOU/TRPC6/FZD4/FGF13/PALMD/CD44/FGD4/MAP1B/ENPP2/PRKN/CDC42SE2/SS18L1/RET/STRIP2/LZTS3/NSMF/FLNA/C15o…	GO_BP
89	GO:0006937~regulation of muscle contraction	44	44/2709	166/18012	8.67283e-05	0.00273063	1.76237	ENSG00000145362/ENSG00000075073/ENSG00000141052/ENSG00000198523/ENSG00000156113/ENSG00000138735/ENSG00000113448/ENSG00000004776/ENSG00000100604/ENSG00000077157/ENSG00000138193/ENSG00000105974/ENSG00000213366/ENSG00000198668/ENSG00000116741/ENSG00000183023/ENSG00000164850/ENSG00000140416/ENSG00000198947/ENSG00000155962/ENSG00000105851/ENSG00000130176/ENSG00000185532/ENSG00000108405/ENSG00000101335…	ANK2/TACR2/MYOCD/PLN/KCNMA1/PDE5A/PDE4D/HSPB6/CHGA/PPP1R12B/PLCE1/CAV1/GSTM2/CALM1/RGS2/SLC8A1/GPER1/TPM1/DMD/CLIC2/PIK3CG/CNN1/PRKG1/P2RX1/MYL9/ARHGAP42/KIT/CAMK2D/DSC2/OXTR/GUCY1A3/FGF13/DMPK/ATP2B1/SRI/FLNA/FKBP1B/ITGA2/AKAP9/STC1/CACNA1C/ATP2A1/ZC3H12A/ADRA2A	GO_BP
90	GO:0060349~bone morphogenesis	33	33/2709	113/18012	8.77969e-05	0.0027483	1.94173	ENSG00000125398/ENSG00000066468/ENSG00000106571/ENSG00000081189/ENSG00000168077/ENSG00000168646/ENSG00000120156/ENSG00000053254/ENSG00000153162/ENSG00000132561/ENSG00000165816/ENSG00000187955/ENSG00000149257/ENSG00000112210/ENSG00000114270/ENSG00000108821/ENSG00000156427/ENSG00000012223/ENSG00000003137/ENSG00000196739/ENSG00000163132/ENSG00000100068/ENSG00000145423/ENSG00000103056/ENSG00000159167…	SOX9/FGFR2/GLI3/MEF2C/SCARA3/AXIN2/TEK/FOXN3/BMP6/MATN2/VWA2/COL14A1/SERPINH1/RAB23/COL7A1/COL1A1/FGF18/LTF/CYP26B1/COL27A1/MSX1/LRP5L/SFRP2/SMPD3/STC1/COMP/SP5/TRPV4/BMP4/MMP14/MMP16/MATN3/MSX2	GO_BP
91	GO:0150063~visual system development	82	82/2709	365/18012	9.23908e-05	0.00283726	1.49374	ENSG00000101605/ENSG00000105894/ENSG00000101680/ENSG00000181541/ENSG00000101938/ENSG00000171791/ENSG00000134138/ENSG00000125398/ENSG00000151090/ENSG00000165821/ENSG00000143995/ENSG00000128573/ENSG00000137273/ENSG00000109846/ENSG00000106571/ENSG00000112715/ENSG00000058668/ENSG00000143816/ENSG00000166402/ENSG00000148516/ENSG00000105989/ENSG00000064309/ENSG00000169554/ENSG00000136826/ENSG00000137936…	MYOM1/PTN/LAMA1/MAB21L2/CHRDL1/BCL2/MEIS2/SOX9/THRB/SALL2/MEIS1/FOXP2/FOXF2/CRYAB/GLI3/VEGFA/ATP2B4/WNT9A/TUB/ZEB1/WNT2/CDON/ZEB2/KLF4/BCAR3/WNT2B/MITF/BMP6/TGIF2/MDM1/RHOJ/FZD4/SDK1/PITX2/ATP2B1/FJX1/GRHL3/CC2D2A/RET/INHBA/CRYBG3/CDK4/MAF/PPP1R13L/ACVRL1/NECTIN3/STRA6/EFEMP1/PDGFRA/SMARCD3/PTPRM/CHD7/IRX5/TH/HSF4/CYP1B1/SHH/NPHP4/SLITRK6/TENM3/CPAMD8/SLC7A11/EPHB2/BFSP1/NTRK2/NKD1/LRP5L/MFAP2/AC…	GO_BP
92	GO:0000280~nuclear division	90	90/2709	409/18012	9.53869e-05	0.00291491	1.46309	ENSG00000079335/ENSG00000088325/ENSG00000175063/ENSG00000124205/ENSG00000174808/ENSG00000101224/ENSG00000185909/ENSG00000255112/ENSG00000119541/ENSG00000071539/ENSG00000172572/ENSG00000101057/ENSG00000126803/ENSG00000087586/ENSG00000186185/ENSG00000011426/ENSG00000154920/ENSG00000179041/ENSG00000142945/ENSG00000135476/ENSG00000164114/ENSG00000175662/ENSG00000146670/ENSG00000090889/ENSG00000136982…	CDC14A/TPX2/UBE2C/EDN3/BTC/CDC25B/KLHDC8B/CHMP1B/VPS4B/TRIP13/PDE3A/MYBL2/HSPA2/AURKA/KIF18B/ANLN/EME1/RRS1/KIF2C/ESPL1/MAP9/TOM1L2/CDCA5/KIF4A/DSCC1/DSN1/BRCA2/MSH5/PLK1/NCAPH/FANCA/KIFC1/BUB1/RAD54L/FLNA/CAV2/RCC1/MEI1/PKMYT1/NEK2/APC/PSRC1/CDC6/CKS2/KIF23/CDT1/KNTC1/MTBP/UBE2S/NAA10/CDCA8/PRC1/TOP2A/LIF/RAD54B/CDC25C/BORA/MAPK15/CDC20/CCNB1/NUF2/BIRC5/CYP26B1/KIF18A/PTTG1/CCNE1/CENPF/TTK/CD28/…	GO_BP
93	GO:0000070~mitotic sister chromatid segregation	41	41/2709	152/18012	9.77979e-05	0.00297401	1.79347	ENSG00000255112/ENSG00000119541/ENSG00000071539/ENSG00000186185/ENSG00000179041/ENSG00000142945/ENSG00000135476/ENSG00000146670/ENSG00000090889/ENSG00000136982/ENSG00000149636/ENSG00000166851/ENSG00000121152/ENSG00000237649/ENSG00000169679/ENSG00000117650/ENSG00000134982/ENSG00000134222/ENSG00000094804/ENSG00000137807/ENSG00000167513/ENSG00000102030/ENSG00000134690/ENSG00000198901/ENSG00000117399…	CHMP1B/VPS4B/TRIP13/KIF18B/RRS1/KIF2C/ESPL1/CDCA5/KIF4A/DSCC1/DSN1/PLK1/NCAPH/KIFC1/BUB1/NEK2/APC/PSRC1/CDC6/KIF23/CDT1/NAA10/CDCA8/PRC1/CDC20/CCNB1/NUF2/KIF18A/PTTG1/CENPF/TTK/KIF14/NCAPG/MAD2L1/MAD2L2/BUB1B/AURKB/SGO1/CHMP4C/DUSP1/CENPE	GO_BP
94	GO:0032963~collagen metabolic process	32	32/2709	109/18012	9.989e-05	0.00302289	1.95198	ENSG00000168477/ENSG00000271447/ENSG00000141570/ENSG00000116473/ENSG00000090530/ENSG00000106397/ENSG00000111077/ENSG00000107738/ENSG00000166482/ENSG00000099953/ENSG00000149257/ENSG00000167755/ENSG00000163131/ENSG00000108821/ENSG00000089041/ENSG00000117385/ENSG00000137673/ENSG00000164171/ENSG00000166670/ENSG00000138316/ENSG00000103056/ENSG00000087116/ENSG00000125378/ENSG00000157227/ENSG00000149968…	TNXB/MMP28/CBX8/RAP1A/P3H2/PLOD3/TNS2/VSIR/MFAP4/MMP11/SERPINH1/KLK6/CTSS/COL1A1/P2RX7/P3H1/MMP7/ITGA2/MMP10/ADAMTS14/SMPD3/ADAMTS2/BMP4/MMP14/MMP3/VIM/MMP1/COL5A1/MMP16/RCN3/FAP/SERPINF2	GO_BP
95	GO:0061138~morphogenesis of a branching epithelium	47	47/2709	182/18012	0.000101132	0.00302649	1.71704	ENSG00000104332/ENSG00000101680/ENSG00000171791/ENSG00000125398/ENSG00000118526/ENSG00000138685/ENSG00000066468/ENSG00000106571/ENSG00000112715/ENSG00000145147/ENSG00000120063/ENSG00000166333/ENSG00000105989/ENSG00000140285/ENSG00000136997/ENSG00000125845/ENSG00000134245/ENSG00000114554/ENSG00000164161/ENSG00000105976/ENSG00000146374/ENSG00000205213/ENSG00000128714/ENSG00000185630/ENSG00000103241…	SFRP1/LAMA1/BCL2/SOX9/TCF21/FGF2/FGFR2/GLI3/VEGFA/SLIT2/GNA13/ILK/WNT2/FGF7/MYC/BMP2/WNT2B/PLXNA1/HHIP/MET/RSPO3/LGR4/HOXD13/PBX1/FOXF1/NTN4/FAT4/FGFR1/AGT/CELSR1/SHH/LEF1/PGF/LRP5L/SFRP2/HOXD11/PROX1/COL4A1/BMP4/MMP14/HOXB13/GPC3/FOXA1/TACSTD2/EDNRA/WNT5A/MSX2	GO_BP
96	GO:0043087~regulation of GTPase activity	101	101/2709	474/18012	0.000136053	0.00373638	1.41676	ENSG00000104332/ENSG00000087258/ENSG00000112276/ENSG00000116473/ENSG00000116741/ENSG00000172724/ENSG00000129474/ENSG00000114993/ENSG00000188906/ENSG00000065882/ENSG00000156299/ENSG00000031003/ENSG00000156234/ENSG00000044524/ENSG00000145147/ENSG00000068831/ENSG00000075884/ENSG00000046889/ENSG00000137449/ENSG00000185532/ENSG00000183856/ENSG00000184349/ENSG00000071205/ENSG00000164691/ENSG00000167037…	SFRP1/GNAO1/BVES/RAP1A/RGS2/CCL19/AJUBA/RTKN/LRRK2/TBC1D1/TIAM1/FAM13B/CXCL13/EPHA3/SLIT2/RASGRP2/ARHGAP15/PREX2/CPEB2/PRKG1/IQGAP3/EFNA5/ARHGAP10/TAGAP/SGSM1/PLXNA1/ARHGEF6/DOCK10/EPHA4/ARHGAP42/RGS10/ARHGAP28/CCL21/ARHGAP44/ASAP3/TBC1D24/F2RL1/CCL15/EZH2/ARFGAP1/SIPA1L2/PLEKHG4/NPRL3/AGAP3/GNAQ/FGD4/ARHGAP24/RANGAP1/GRHL3/GIT1/NCKAP1L/CCR7/DOCK2/ARRB1/S1PR1/TBC1D9/IQGAP2/TBC1D16/CAV2/ARHGAP25/E…	GO_BP
97	GO:0009612~response to mechanical stimulus	52	52/2709	210/18012	0.0001435	0.00388949	1.64641	ENSG00000186642/ENSG00000105894/ENSG00000107562/ENSG00000169860/ENSG00000134138/ENSG00000125398/ENSG00000128573/ENSG00000183023/ENSG00000026103/ENSG00000198947/ENSG00000164342/ENSG00000157404/ENSG00000171522/ENSG00000196664/ENSG00000153162/ENSG00000142867/ENSG00000111913/ENSG00000100739/ENSG00000131711/ENSG00000146733/ENSG00000011465/ENSG00000137868/ENSG00000120256/ENSG00000120899/ENSG00000108821…	PDE2A/PTN/CXCL12/P2RY1/MEIS2/SOX9/FOXP2/SLC8A1/FAS/DMD/TLR3/KIT/PTGER4/TLR7/BMP6/BCL10/RIPOR2/BDKRB1/MAP1B/PSPH/DCN/STRA6/LRP11/PTK2B/COL1A1/TXNIP/P2RX7/CASP5/CHI3L1/AGT/ASNS/TNFRSF10B/USP53/CCNB1/TLR5/FOSL1/SLITRK6/PDZD7/COL11A1/MMP7/FOSB/NRXN2/PIEZO2/ITGA2/TLR8/SLC2A1/ANGPT2/TRPA1/TRPV4/AQP1/MMP14/SERPINE2	GO_BP
98	GO:0008202~steroid metabolic process	75	75/2709	332/18012	0.000150121	0.00404951	1.50202	ENSG00000197165/ENSG00000135437/ENSG00000086696/ENSG00000196620/ENSG00000076555/ENSG00000197888/ENSG00000073737/ENSG00000162409/ENSG00000116833/ENSG00000025423/ENSG00000112175/ENSG00000116678/ENSG00000187134/ENSG00000141447/ENSG00000099194/ENSG00000070882/ENSG00000125845/ENSG00000166311/ENSG00000109819/ENSG00000111012/ENSG00000151632/ENSG00000170271/ENSG00000081923/ENSG00000157404/ENSG00000062282…	SULT1A2/RDH5/HSD17B2/UGT2B15/ACACB/UGT2B17/DHRS9/PRKAA2/NR5A2/HSD17B6/BMP5/LEPR/AKR1C1/OSBPL1A/SCD/OSBPL3/BMP2/SMPD1/PPARGC1A/CYP27B1/AKR1C2/FAXDC2/ATP8B1/KIT/DGAT2/SULT1A1/ACAT1/BMP6/LIMA1/CACNA1H/SCP2/DHRS11/VLDLR/SULT1B1/SULT2B1/PBX1/EPHX2/SNAI1/SRD5A1/FASN/SCARB1/EBPL/DHCR7/FGF19/PDGFRA/ACAA2/HSD17B11/FGFR4/SEC14L2/FGFR1/SQLE/AGT/RORA/NR1D1/CYP1B1/COMT/CYP26B1/NSDHL/SHH/HSD11B2/PCSK9/ABCA1/ST…	GO_BP
99	GO:0043114~regulation of vascular permeability	15	15/2709	37/18012	0.000152066	0.00405567	2.69552	ENSG00000186642/ENSG00000075073/ENSG00000112715/ENSG00000169418/ENSG00000145147/ENSG00000172572/ENSG00000154188/ENSG00000120156/ENSG00000131016/ENSG00000153162/ENSG00000168398/ENSG00000184489/ENSG00000198535/ENSG00000079385/ENSG00000111199	PDE2A/TACR2/VEGFA/NPR1/SLIT2/PDE3A/ANGPT1/TEK/AKAP12/BMP6/BDKRB2/PTP4A3/C2CD4A/CEACAM1/TRPV4	GO_BP
100	GO:0051985~negative regulation of chromosome segregation	17	17/2709	45/18012	0.000158292	0.0041723	2.51182	ENSG00000071539/ENSG00000135476/ENSG00000166851/ENSG00000169679/ENSG00000134982/ENSG00000167513/ENSG00000102030/ENSG00000117399/ENSG00000134057/ENSG00000164611/ENSG00000117724/ENSG00000112742/ENSG00000164109/ENSG00000116670/ENSG00000156970/ENSG00000178999/ENSG00000120129	TRIP13/ESPL1/PLK1/BUB1/APC/CDT1/NAA10/CDC20/CCNB1/PTTG1/CENPF/TTK/MAD2L1/MAD2L2/BUB1B/AURKB/DUSP1	GO_BP
101	GO:0030318~melanocyte differentiation	12	2709-12-01	26/18012	0.000159958	0.0041723	3.06875	ENSG00000171791/ENSG00000069974/ENSG00000106571/ENSG00000081189/ENSG00000124205/ENSG00000049130/ENSG00000169554/ENSG00000157404/ENSG00000187098/ENSG00000136160/ENSG00000197535/ENSG00000088256	BCL2/RAB27A/GLI3/MEF2C/EDN3/KITLG/ZEB2/KIT/MITF/EDNRB/MYO5A/GNA11	GO_BP
102	GO:0032957~inositol trisphosphate metabolic process	12	2709-12-01	26/18012	0.000159958	0.0041723	3.06875	ENSG00000154822/ENSG00000169860/ENSG00000138193/ENSG00000115556/ENSG00000164850/ENSG00000187091/ENSG00000197943/ENSG00000143772/ENSG00000115896/ENSG00000124181/ENSG00000120899/ENSG00000161714	PLCL2/P2RY1/PLCE1/PLCD4/GPER1/PLCD1/PLCG2/ITPKB/PLCL1/PLCG1/PTK2B/PLCD3	GO_BP
103	GO:0045926~negative regulation of growth	59	59/2709	248/18012	0.000174245	0.00445182	1.58181	ENSG00000205364/ENSG00000104332/ENSG00000205358/ENSG00000065320/ENSG00000198417/ENSG00000187193/ENSG00000022267/ENSG00000171791/ENSG00000197380/ENSG00000137872/ENSG00000184347/ENSG00000134533/ENSG00000143995/ENSG00000116741/ENSG00000109846/ENSG00000133104/ENSG00000125144/ENSG00000145088/ENSG00000204614/ENSG00000120833/ENSG00000169418/ENSG00000145147/ENSG00000169715/ENSG00000125148/ENSG00000092421…	MT1M/SFRP1/MT1H/NTN1/MT1F/MT1X/FHL1/BCL2/DACT3/SEMA6D/SLIT3/RERG/MEIS1/RGS2/CRYAB/SPART/MT1G/EAF2/TRIM40/SOCS2/NPR1/SLIT2/MT1E/MT2A/SEMA6A/CYP27B1/SEMA3G/APBB1/NOV/PLAC8/FGF13/BDKRB1/MIR17HG/WFDC1/INHBA/GDF15/ACVRL1/WNT3/FRZB/PSRC1/PLXNA3/STC2/AGT/MSX1/PTPRS/NKD1/HSPA1B/SFRP2/CDKN1A/BMP4/SEMA5B/GPC3/CDKN2A/CDA/RGS4/CDHR2/WNT5A/CCDC85B/SERPINE2	GO_BP
104	GO:0051384~response to glucocorticoid	39	39/2709	146/18012	0.00017834	0.00451356	1.77609	ENSG00000168309/ENSG00000160307/ENSG00000113580/ENSG00000171791/ENSG00000184347/ENSG00000090447/ENSG00000069535/ENSG00000119138/ENSG00000156804/ENSG00000163347/ENSG00000084774/ENSG00000145147/ENSG00000162688/ENSG00000155846/ENSG00000110092/ENSG00000153162/ENSG00000139515/ENSG00000070961/ENSG00000145545/ENSG00000204472/ENSG00000124253/ENSG00000164463/ENSG00000138772/ENSG00000150907/ENSG00000088305…	FAM107A/S100B/NR3C1/BCL2/SLIT3/TFAP4/MAOB/KLF9/FBXO32/CLDN1/CAD/SLIT2/AGL/PPARGC1B/CCND1/BMP6/PDX1/ATP2B1/SRD5A1/AIF1/PCK1/CREBRF/ANXA3/FOXO1/DNMT3B/DDIT4/TH/GSTP1/FOSL1/HSD11B2/FOSB/ABCA3/EIF4EBP1/DUSP1/CDKN1A/STC1/AQP1/CTSV/ABCC2	GO_BP
105	GO:0001837~epithelial to mesenchymal transition	37	37/2709	137/18012	0.000203106	0.00486177	1.7957	ENSG00000111846/ENSG00000104332/ENSG00000122694/ENSG00000197380/ENSG00000125398/ENSG00000137273/ENSG00000150593/ENSG00000066468/ENSG00000130558/ENSG00000156299/ENSG00000112175/ENSG00000044524/ENSG00000105989/ENSG00000125845/ENSG00000144824/ENSG00000168646/ENSG00000018408/ENSG00000106462/ENSG00000140682/ENSG00000069702/ENSG00000108187/ENSG00000183779/ENSG00000124216/ENSG00000130726/ENSG00000070814…	GCNT2/SFRP1/GLIPR2/DACT3/SOX9/FOXF2/PDCD4/FGFR2/OLFM1/TIAM1/BMP5/EPHA3/WNT2/BMP2/PHLDB2/AXIN2/WWTR1/EZH2/TGFB1I1/TGFBR3/PBLD/ZNF703/SNAI1/TRIM28/TCOF1/COL1A1/LOXL2/LEF1/MSX1/MAD2L2/PDPN/SFRP2/BMP4/FOXA2/FOXA1/WNT5A/MSX2	GO_BP
106	GO:0034121~regulation of toll-like receptor signaling pathway	22	22/2709	67/18012	0.000205278	0.00486177	2.18324	ENSG00000135218/ENSG00000105974/ENSG00000198961/ENSG00000164342/ENSG00000137265/ENSG00000136044/ENSG00000164251/ENSG00000205213/ENSG00000154589/ENSG00000134321/ENSG00000174125/ENSG00000174130/ENSG00000126368/ENSG00000012223/ENSG00000187554/ENSG00000276600/ENSG00000170458/ENSG00000105426/ENSG00000162676/ENSG00000023445/ENSG00000090376/ENSG00000092445	CD36/CAV1/PJA2/TLR3/IRF4/APPL2/F2RL1/LGR4/LY96/RSAD2/TLR1/TLR6/NR1D1/LTF/TLR5/RAB7B/CD14/PTPRS/GFI1/BIRC3/IRAK3/TYRO3	GO_BP
107	GO:0007094~mitotic spindle assembly checkpoint	14	14/2709	34/18012	0.000206668	0.00486177	2.7378	ENSG00000071539/ENSG00000166851/ENSG00000169679/ENSG00000134982/ENSG00000167513/ENSG00000117399/ENSG00000134057/ENSG00000117724/ENSG00000112742/ENSG00000164109/ENSG00000116670/ENSG00000156970/ENSG00000178999/ENSG00000120129	TRIP13/PLK1/BUB1/APC/CDT1/CDC20/CCNB1/CENPF/TTK/MAD2L1/MAD2L2/BUB1B/AURKB/DUSP1	GO_BP
108	GO:0010922~positive regulation of phosphatase activity	14	14/2709	34/18012	0.000206668	0.00486177	2.7378	ENSG00000198668/ENSG00000081189/ENSG00000187391/ENSG00000196950/ENSG00000104643/ENSG00000125845/ENSG00000096384/ENSG00000155846/ENSG00000166869/ENSG00000058272/ENSG00000081237/ENSG00000164171/ENSG00000105383/ENSG00000115956	CALM1/MEF2C/MAGI2/SLC39A10/MTMR9/BMP2/HSP90AB1/PPARGC1B/CHP2/PPP1R12A/PTPRC/ITGA2/CD33/PLEK	GO_BP
109	GO:0031577~spindle checkpoint	14	14/2709	34/18012	0.000206668	0.00486177	2.7378	ENSG00000071539/ENSG00000166851/ENSG00000169679/ENSG00000134982/ENSG00000167513/ENSG00000117399/ENSG00000134057/ENSG00000117724/ENSG00000112742/ENSG00000164109/ENSG00000116670/ENSG00000156970/ENSG00000178999/ENSG00000120129	TRIP13/PLK1/BUB1/APC/CDT1/CDC20/CCNB1/CENPF/TTK/MAD2L1/MAD2L2/BUB1B/AURKB/DUSP1	GO_BP
110	GO:0071173~spindle assembly checkpoint	14	14/2709	34/18012	0.000206668	0.00486177	2.7378	ENSG00000071539/ENSG00000166851/ENSG00000169679/ENSG00000134982/ENSG00000167513/ENSG00000117399/ENSG00000134057/ENSG00000117724/ENSG00000112742/ENSG00000164109/ENSG00000116670/ENSG00000156970/ENSG00000178999/ENSG00000120129	TRIP13/PLK1/BUB1/APC/CDT1/CDC20/CCNB1/CENPF/TTK/MAD2L1/MAD2L2/BUB1B/AURKB/DUSP1	GO_BP
111	GO:0071174~mitotic spindle checkpoint	14	14/2709	34/18012	0.000206668	0.00486177	2.7378	ENSG00000071539/ENSG00000166851/ENSG00000169679/ENSG00000134982/ENSG00000167513/ENSG00000117399/ENSG00000134057/ENSG00000117724/ENSG00000112742/ENSG00000164109/ENSG00000116670/ENSG00000156970/ENSG00000178999/ENSG00000120129	TRIP13/PLK1/BUB1/APC/CDT1/CDC20/CCNB1/CENPF/TTK/MAD2L1/MAD2L2/BUB1B/AURKB/DUSP1	GO_BP
112	GO:0051897~positive regulation of protein kinase B signaling	44	44/2709	173/18012	0.0002391	0.00540424	1.69106	ENSG00000111846/ENSG00000138685/ENSG00000172724/ENSG00000180543/ENSG00000066468/ENSG00000105851/ENSG00000174808/ENSG00000109458/ENSG00000166333/ENSG00000049130/ENSG00000140285/ENSG00000158828/ENSG00000154188/ENSG00000096384/ENSG00000100302/ENSG00000151632/ENSG00000183578/ENSG00000214078/ENSG00000157404/ENSG00000137077/ENSG00000105976/ENSG00000120156/ENSG00000165731/ENSG00000126353/ENSG00000130513…	GCNT2/FGF2/CCL19/TSPYL5/FGFR2/PIK3CG/BTC/GAB1/ILK/KITLG/FGF7/PINK1/ANGPT1/HSP90AB1/RASD2/AKR1C2/TNFAIP8L3/CPNE1/KIT/CCL21/MET/TEK/RET/CCR7/GDF15/FGF19/PDGFRA/FGFR4/HPSE/FGFR1/CHI3L1/FGF18/AXL/VAV1/PIK3CD/HCLS1/NRG1/MC1R/CD28/C1QTNF12/PIK3R5/CD86/OSM/NOX4	GO_BP
113	GO:0045446~endothelial cell differentiation	31	31/2709	109/18012	0.000239817	0.00540424	1.89099	ENSG00000186642/ENSG00000105894/ENSG00000113448/ENSG00000116473/ENSG00000114790/ENSG00000163347/ENSG00000101445/ENSG00000112715/ENSG00000148516/ENSG00000106397/ENSG00000184113/ENSG00000105976/ENSG00000164251/ENSG00000153162/ENSG00000134202/ENSG00000158125/ENSG00000169710/ENSG00000170989/ENSG00000139567/ENSG00000137710/ENSG00000157168/ENSG00000179820/ENSG00000105426/ENSG00000079385/ENSG00000162493…	PDE2A/PTN/PDE4D/RAP1A/ARHGEF26/CLDN1/PPP1R16B/VEGFA/ZEB1/PLOD3/CLDN5/MET/F2RL1/BMP6/GSTM3/XDH/FASN/S1PR1/ACVRL1/RDX/NRG1/MYADM/PTPRS/CEACAM1/PDPN/SCUBE1/COL4A4/STC1/PROX1/BMP4/ATOH8	GO_BP
114	GO:0051302~regulation of cell division	43	43/2709	168/18012	0.000240997	0.00540424	1.70181	ENSG00000105894/ENSG00000079335/ENSG00000197321/ENSG00000170962/ENSG00000198668/ENSG00000138685/ENSG00000066468/ENSG00000112715/ENSG00000174808/ENSG00000101224/ENSG00000113296/ENSG00000185862/ENSG00000183742/ENSG00000140285/ENSG00000136997/ENSG00000087586/ENSG00000091651/ENSG00000186185/ENSG00000165689/ENSG00000112984/ENSG00000171552/ENSG00000164114/ENSG00000139618/ENSG00000108262/ENSG00000166851…	PTN/CDC14A/SVIL/PDGFD/CALM1/FGF2/FGFR2/VEGFA/BTC/CDC25B/THBS4/EVI2B/MACC1/FGF7/MYC/AURKA/ORC6/KIF18B/SDCCAG3/KIF20A/BCL2L1/MAP9/BRCA2/GIT1/PLK1/E2F7/TAL1/CDC6/ECT2/KIF23/TXNIP/PRC1/RBL1/SHH/KLHL13/KIF14/AURKB/CHMP4C/PGF/SFRP2/ASPM/OSM/C10orf99	GO_BP
115	GO:0001658~branching involved in ureteric bud morphogenesis	20	20/2709	59/18012	0.000243258	0.00541596	2.25388	ENSG00000171791/ENSG00000125398/ENSG00000118526/ENSG00000138685/ENSG00000106571/ENSG00000112715/ENSG00000166333/ENSG00000136997/ENSG00000125845/ENSG00000134245/ENSG00000205213/ENSG00000185630/ENSG00000196159/ENSG00000135744/ENSG00000164690/ENSG00000119630/ENSG00000128713/ENSG00000125378/ENSG00000147257/ENSG00000184292	BCL2/SOX9/TCF21/FGF2/GLI3/VEGFA/ILK/MYC/BMP2/WNT2B/LGR4/PBX1/FAT4/AGT/SHH/PGF/HOXD11/BMP4/GPC3/TACSTD2	GO_BP
116	GO:0034446~substrate adhesion-dependent cell spreading	29	29/2709	100/18012	0.000261097	0.0057719	1.92819	ENSG00000112276/ENSG00000072163/ENSG00000166333/ENSG00000184349/ENSG00000197702/ENSG00000073712/ENSG00000077943/ENSG00000120156/ENSG00000174804/ENSG00000259207/ENSG00000074527/ENSG00000196924/ENSG00000146904/ENSG00000167601/ENSG00000151422/ENSG00000179820/ENSG00000139626/ENSG00000111859/ENSG00000115232/ENSG00000118193/ENSG00000162493/ENSG00000077942/ENSG00000087589/ENSG00000182580/ENSG00000163975…	BVES/LIMS2/ILK/EFNA5/PARVA/FERMT2/ITGA8/TEK/FZD4/ITGB3/NTN4/FLNA/EPHA1/AXL/FER/MYADM/ITGB7/NEDD9/ITGA4/KIF14/PDPN/FBLN1/CASS4/EPHB3/MELTF/SRCIN1/TACSTD2/FZD7/TYRO3	GO_BP
117	GO:0071496~cellular response to external stimulus	75	75/2709	338/18012	0.00026861	0.00589617	1.47536	ENSG00000168309/ENSG00000104332/ENSG00000186642/ENSG00000105894/ENSG00000176641/ENSG00000004799/ENSG00000141052/ENSG00000169860/ENSG00000171791/ENSG00000125398/ENSG00000147883/ENSG00000026103/ENSG00000181061/ENSG00000162409/ENSG00000197256/ENSG00000188906/ENSG00000165457/ENSG00000164342/ENSG00000111012/ENSG00000134245/ENSG00000171522/ENSG00000084676/ENSG00000134755/ENSG00000196664/ENSG00000153162…	FAM107A/SFRP1/PDE2A/PTN/RNF152/PDK4/MYOCD/P2RY1/BCL2/SOX9/CDKN2B/FAS/HIGD1A/PRKAA2/KANK2/LRRK2/FOLR2/TLR3/CYP27B1/WNT2B/PTGER4/NCOA1/DSC2/TLR7/BMP6/BCL10/RIPOR2/NPRL3/EHMT2/CPEB4/MYBBP1A/ATP2B1/SRD5A1/KLF10/AIF1/PCK1/GABARAP/COL1A1/PTPRC/FOXO1/P2RX7/CASP5/AGT/ASNS/AXL/TNFRSF10B/GSTP1/COMT/KRT20/TLR5/FOSL1/PCSK9/MMP7/GABARAPL1/ITGA4/PIEZO2/ITGA2/PMAIP1/SLC39A4/TLR8/SLC2A1/HMOX1/VCAM1/SFRP2/CDKN1A/…	GO_BP
118	GO:1904062~regulation of cation transmembrane transport	75	75/2709	338/18012	0.00026861	0.00589617	1.47536	ENSG00000185774/ENSG00000145362/ENSG00000145936/ENSG00000198523/ENSG00000151320/ENSG00000113448/ENSG00000149596/ENSG00000022267/ENSG00000177098/ENSG00000137726/ENSG00000163681/ENSG00000220205/ENSG00000153956/ENSG00000105974/ENSG00000213366/ENSG00000198668/ENSG00000116741/ENSG00000183023/ENSG00000164850/ENSG00000169282/ENSG00000198947/ENSG00000081189/ENSG00000155962/ENSG00000105851/ENSG00000058668…	KCNIP4/ANK2/KCNMB1/PLN/AKAP6/PDE4D/JPH2/FHL1/SCN4B/FXYD6/SLMAP/VAMP2/CACNA2D1/CAV1/GSTM2/CALM1/RGS2/SLC8A1/GPER1/KCNAB1/DMD/MEF2C/CLIC2/PIK3CG/ATP2B4/EDN3/CEMIP/NEDD4L/GPD1L/ANK3/PINK1/PLCG2/PPARGC1A/HSPA2/FXYD5/AHNAK/CACNB2/CCR2/CAMK2D/TRPC1/PLCG1/LIME1/BDKRB1/TESC/SRI/MYO5A/GRIN2B/FLNA/DAPK1/STOM/PRNP/PTK2B/CTSS/GPR35/ANXA3/FKBP1B/CHD7/CACNA1D/AGT/PCSK9/JPH1/SCN1B/AKAP9/EPHB2/CBARP/HOMER1/FXYD3…	GO_BP
119	GO:0071695~anatomical structure maturation	42	42/2709	164/18012	0.000279132	0.00608324	1.70278	ENSG00000186417/ENSG00000062038/ENSG00000171791/ENSG00000122707/ENSG00000188906/ENSG00000133710/ENSG00000153902/ENSG00000101224/ENSG00000071539/ENSG00000172572/ENSG00000162769/ENSG00000125845/ENSG00000087586/ENSG00000101104/ENSG00000136160/ENSG00000197535/ENSG00000139618/ENSG00000165731/ENSG00000162367/ENSG00000074527/ENSG00000170989/ENSG00000196159/ENSG00000163531/ENSG00000139567/ENSG00000101311…	GLDN/CDH3/BCL2/RECK/LRRK2/SPINK5/LGI4/CDC25B/TRIP13/PDE3A/FLVCR1/BMP2/AURKA/PABPC1L/EDNRB/MYO5A/BRCA2/RET/TAL1/NTN4/S1PR1/FAT4/NFASC/ACVRL1/FERMT1/PLXNB1/PTK2B/IRX5/LTF/CCNB1/AGRN/TBX6/ANG/CDKN1A/C1QA/KLF2/TFCP2L1/HOXB13/FOXA1/ALDH1A2/WNT5A/MSX2	GO_BP
120	GO:0002673~regulation of acute inflammatory response	28	28/2709	96/18012	0.000297874	0.00638126	1.93928	ENSG00000112936/ENSG00000163687/ENSG00000105851/ENSG00000134352/ENSG00000010671/ENSG00000000971/ENSG00000120885/ENSG00000072694/ENSG00000126759/ENSG00000166278/ENSG00000050628/ENSG00000136160/ENSG00000126353/ENSG00000155659/ENSG00000188372/ENSG00000198535/ENSG00000084207/ENSG00000141655/ENSG00000243649/ENSG00000175899/ENSG00000162711/ENSG00000176919/ENSG00000213918/ENSG00000173372/ENSG00000184500…	C7/DNASE1L3/PIK3CG/IL6ST/BTK/CFH/CLU/FCGR2B/CFP/C2/PTGER3/EDNRB/CCR7/VSIG4/ZP3/C2CD4A/GSTP1/TNFRSF11A/CFB/A2M/NLRP3/C8G/DNASE1/C1QA/PROS1/OSM/C4BPB/F12	GO_BP
121	GO:0001503~ossification	84	84/2709	389/18012	0.000306756	0.00648243	1.43576	ENSG00000163815/ENSG00000104332/ENSG00000046653/ENSG00000105894/ENSG00000160712/ENSG00000101938/ENSG00000171791/ENSG00000130055/ENSG00000125398/ENSG00000078804/ENSG00000183023/ENSG00000066468/ENSG00000106571/ENSG00000081189/ENSG00000112175/ENSG00000166333/ENSG00000134352/ENSG00000162733/ENSG00000185885/ENSG00000125845/ENSG00000197157/ENSG00000111012/ENSG00000155846/ENSG00000155850/ENSG00000168646…	CLEC3B/SFRP1/GPM6B/PTN/IL6R/CHRDL1/BCL2/GDPD2/SOX9/TP53INP2/SLC8A1/FGFR2/GLI3/MEF2C/BMP5/ILK/IL6ST/DDR2/IFITM1/BMP2/SND1/CYP27B1/PPARGC1B/SLC26A2/AXIN2/TEK/PTGER4/IARS/WWTR1/BMP6/LGR4/RASSF2/PBX1/MYBBP1A/ATP2B1/CEBPB/CBFB/SNAI1/TWIST2/MGP/FBL/ROR2/FASN/KLF10/S1PR1/FAT4/BCAP29/WNT3/PLXNB1/SBNO2/ID2/PTK2B/COL1A1/P2RX7/FGF18/LTF/CLEC5A/SHH/COL11A1/TNFRSF11A/LEF1/CTHRC1/KREMEN2/LRP5L/SRGN/SFRP2/WISP1…	GO_BP
122	GO:0010717~regulation of epithelial to mesenchymal transition	26	26/2709	87/18012	0.000316893	0.00662924	1.98704	ENSG00000111846/ENSG00000104332/ENSG00000122694/ENSG00000197380/ENSG00000130558/ENSG00000156299/ENSG00000112175/ENSG00000044524/ENSG00000125845/ENSG00000144824/ENSG00000168646/ENSG00000018408/ENSG00000106462/ENSG00000140682/ENSG00000108187/ENSG00000183779/ENSG00000124216/ENSG00000108821/ENSG00000134013/ENSG00000138795/ENSG00000116670/ENSG00000162493/ENSG00000145423/ENSG00000125378/ENSG00000125798…	GCNT2/SFRP1/GLIPR2/DACT3/OLFM1/TIAM1/BMP5/EPHA3/BMP2/PHLDB2/AXIN2/WWTR1/EZH2/TGFB1I1/PBLD/ZNF703/SNAI1/COL1A1/LOXL2/LEF1/MAD2L2/PDPN/SFRP2/BMP4/FOXA2/FOXA1	GO_BP
123	GO:0014829~vascular smooth muscle contraction	11	2709-11-01	24/18012	0.000324553	0.00665652	3.04743	ENSG00000183023/ENSG00000124205/ENSG00000108405/ENSG00000165895/ENSG00000136160/ENSG00000070961/ENSG00000135744/ENSG00000107796/ENSG00000105664/ENSG00000004468/ENSG00000151617	SLC8A1/EDN3/P2RX1/ARHGAP42/EDNRB/ATP2B1/AGT/ACTA2/COMP/CD38/EDNRA	GO_BP
124	GO:0032060~bleb assembly	7	2709-07-01	11/18012	0.000325672	0.00665652	4.23115	ENSG00000198121/ENSG00000065534/ENSG00000011426/ENSG00000109099/ENSG00000134531/ENSG00000142227/ENSG00000089041	LPAR1/MYLK/ANLN/PMP22/EMP1/EMP3/P2RX7	GO_BP
125	GO:0071300~cellular response to retinoic acid	22	22/2709	69/18012	0.000329198	0.00666304	2.11995	ENSG00000125398/ENSG00000066468/ENSG00000143816/ENSG00000044524/ENSG00000105989/ENSG00000136826/ENSG00000062524/ENSG00000174804/ENSG00000088992/ENSG00000165731/ENSG00000108379/ENSG00000124253/ENSG00000120899/ENSG00000108821/ENSG00000112655/ENSG00000003137/ENSG00000165029/ENSG00000240583/ENSG00000111186/ENSG00000155760/ENSG00000128918/ENSG00000114251	SOX9/FGFR2/WNT9A/EPHA3/WNT2/KLF4/LTK/FZD4/TESC/RET/WNT3/PCK1/PTK2B/COL1A1/PTK7/CYP26B1/ABCA1/AQP1/WNT5B/FZD7/ALDH1A2/WNT5A	GO_BP
126	GO:0009914~hormone transport	72	72/2709	324/18012	0.000336463	0.00678805	1.47754	ENSG00000104332/ENSG00000075073/ENSG00000173175/ENSG00000169860/ENSG00000100604/ENSG00000116473/ENSG00000164850/ENSG00000124766/ENSG00000150995/ENSG00000053438/ENSG00000124205/ENSG00000146469/ENSG00000156299/ENSG00000101187/ENSG00000151729/ENSG00000148660/ENSG00000184349/ENSG00000082196/ENSG00000142330/ENSG00000010671/ENSG00000153162/ENSG00000171388/ENSG00000139515/ENSG00000136999/ENSG00000174804…	SFRP1/TACR2/ADCY5/P2RY1/CHGA/RAP1A/GPER1/SOX4/ITPR1/NNAT/EDN3/VIP/TIAM1/SLCO4A1/SLC25A4/CAMK2G/EFNA5/C1QTNF3/CAPN10/BTK/BMP6/APLN/PDX1/NOV/FZD4/FFAR4/ICA1/PASK/PRKN/TFR2/SRI/MYO5A/INHBA/ARRB1/HNF1A/FGFR1/FKBP1B/SYT7/VSNL1/OXCT1/CHD7/CACNA1D/AGT/PTPRN/IL11/LIF/NR1D1/STX1A/LTBP4/C1QTNF12/NMB/SLC16A2/SCG5/ACVR1C/SLC2A1/CCL5/LRP5L/SMPD3/CRYM/SLC44A4/TRPV4/CACNA1C/FOXA2/CD38/KCNJ11/FAM3B/SELENOM/INHBB…	GO_BP
127	GO:0048871~multicellular organismal homeostasis	100	100/2709	481/18012	0.000371175	0.00728896	1.38232	ENSG00000111846/ENSG00000004799/ENSG00000005249/ENSG00000173175/ENSG00000135218/ENSG00000154822/ENSG00000062038/ENSG00000104267/ENSG00000171791/ENSG00000076555/ENSG00000125398/ENSG00000105974/ENSG00000078804/ENSG00000168447/ENSG00000078295/ENSG00000162409/ENSG00000163347/ENSG00000112715/ENSG00000182636/ENSG00000116678/ENSG00000137265/ENSG00000166402/ENSG00000099194/ENSG00000136044/ENSG00000157184…	GCNT2/PDK4/PRKAR2B/ADCY5/CD36/PLCL2/CDH3/CA2/BCL2/ACACB/SOX9/CAV1/TP53INP2/SCNN1B/ADCY2/PRKAA2/CLDN1/VEGFA/NDN/LEPR/IRF4/TUB/SCD/APPL2/CPT2/AMPD2/PPARGC1A/KIAA1211/PPARGC1B/CCR2/MET/PRKACB/SLC22A5/WWTR1/BMP6/LGR4/TNS2/OXTR/MDM1/APLN/ADCY9/PLAC8/FFAR4/PLCL1/PBLD/ITGB3/PTGER3/EDNRB/PASK/GRHL3/CEBPB/AKT3/JCHAIN/GRHL1/S1PR1/PPP1R13L/APC/PGAM5/AZGP1/MLXIPL/ADCY3/PTK2B/CMKLR1/OGT/FOXO1/P2RX7/CDH23/LDB2…	GO_BP
128	GO:0045931~positive regulation of mitotic cell cycle	41	41/2709	161/18012	0.000371814	0.00728896	1.69321	ENSG00000036672/ENSG00000134138/ENSG00000175063/ENSG00000124205/ENSG00000174808/ENSG00000101224/ENSG00000119541/ENSG00000154734/ENSG00000126803/ENSG00000087586/ENSG00000110092/ENSG00000135476/ENSG00000146670/ENSG00000161692/ENSG00000185630/ENSG00000139618/ENSG00000162367/ENSG00000135446/ENSG00000204472/ENSG00000094804/ENSG00000167513/ENSG00000172167/ENSG00000077782/ENSG00000082014/ENSG00000143476…	USP2/MEIS2/UBE2C/EDN3/BTC/CDC25B/VPS4B/ADAMTS1/HSPA2/AURKA/CCND1/ESPL1/CDCA5/DBF4B/PBX1/BRCA2/TAL1/CDK4/AIF1/CDC6/CDT1/MTBP/FGFR1/SMARCD3/DTL/CDC45/ASNS/CDC25C/CCNB1/CDK10/RDX/CCNE1/CD28/MAD2L1/EIF4EBP1/CDK1/CDC25A/SMPD3/TERT/UBE2E2/FOXA1	GO_BP
129	GO:0097503~sialylation	10	2709-10-01	21/18012	0.000415782	0.00789861	3.16617	ENSG00000111728/ENSG00000160408/ENSG00000184005/ENSG00000126091/ENSG00000144057/ENSG00000113532/ENSG00000110080/ENSG00000070731/ENSG00000064225/ENSG00000070526	ST8SIA1/ST6GALNAC6/ST6GALNAC3/ST3GAL3/ST6GAL2/ST8SIA4/ST3GAL4/ST6GALNAC2/ST3GAL6/ST6GALNAC1	GO_BP
130	GO:0009187~cyclic nucleotide metabolic process	15	15/2709	40/18012	0.000418417	0.00789861	2.49336	ENSG00000186642/ENSG00000173175/ENSG00000138735/ENSG00000113448/ENSG00000115252/ENSG00000078295/ENSG00000169418/ENSG00000160191/ENSG00000116337/ENSG00000164116/ENSG00000162104/ENSG00000138031/ENSG00000105650/ENSG00000069667/ENSG00000061918	PDE2A/ADCY5/PDE5A/PDE4D/PDE1A/ADCY2/NPR1/PDE9A/AMPD2/GUCY1A3/ADCY9/ADCY3/PDE4C/RORA/GUCY1B3	GO_BP
131	GO:1905819~negative regulation of chromosome separation	15	15/2709	40/18012	0.000418417	0.00789861	2.49336	ENSG00000071539/ENSG00000166851/ENSG00000169679/ENSG00000134982/ENSG00000167513/ENSG00000117399/ENSG00000134057/ENSG00000164611/ENSG00000117724/ENSG00000112742/ENSG00000164109/ENSG00000116670/ENSG00000156970/ENSG00000178999/ENSG00000120129	TRIP13/PLK1/BUB1/APC/CDT1/CDC20/CCNB1/PTTG1/CENPF/TTK/MAD2L1/MAD2L2/BUB1B/AURKB/DUSP1	GO_BP
132	GO:0002824~positive regulation of adaptive immune response based on somatic recombination of immune receptors built from immunoglobulin superfamily domains	28	28/2709	98/18012	0.000432124	0.0079465	1.8997	ENSG00000160712/ENSG00000172724/ENSG00000158473/ENSG00000010671/ENSG00000104312/ENSG00000121807/ENSG00000073008/ENSG00000159958/ENSG00000144381/ENSG00000127191/ENSG00000134321/ENSG00000188372/ENSG00000081237/ENSG00000161955/ENSG00000089041/ENSG00000110944/ENSG00000178562/ENSG00000166710/ENSG00000136630/ENSG00000162711/ENSG00000116670/ENSG00000122122/ENSG00000102524/ENSG00000115594/ENSG00000010610…	IL6R/CCL19/CD1D/BTK/RIPK2/CCR2/PVR/TNFRSF13C/HSPD1/TRAF2/RSAD2/ZP3/PTPRC/TNFSF13/P2RX7/IL23A/CD28/B2M/HLX/NLRP3/MAD2L2/SASH3/TNFSF13B/IL1R1/CD4/SLC11A1/FOXP3/C20orf196	GO_BP
133	GO:0051224~negative regulation of protein transport	46	46/2709	188/18012	0.000446676	0.00816592	1.62687	ENSG00000104332/ENSG00000135218/ENSG00000048052/ENSG00000100604/ENSG00000115590/ENSG00000012124/ENSG00000188906/ENSG00000111863/ENSG00000129667/ENSG00000154188/ENSG00000082196/ENSG00000204713/ENSG00000171522/ENSG00000072694/ENSG00000164251/ENSG00000205213/ENSG00000136999/ENSG00000186188/ENSG00000135272/ENSG00000153064/ENSG00000100401/ENSG00000185345/ENSG00000132718/ENSG00000112210/ENSG00000179954…	SFRP1/CD36/HDAC9/CHGA/IL1R2/CD22/LRRK2/ADTRP/RHBDF2/ANGPT1/C1QTNF3/TRIM27/PTGER4/FCGR2B/F2RL1/LGR4/NOV/FFAR4/MDFIC/BANK1/RANGAP1/PRKN/SYT11/RAB23/SSC5D/FERMT1/RSAD2/FKBP1B/VSNL1/PKIA/TLR6/RHBDF1/NLRP3/TLR8/ACVR1C/ARG2/SRGN/KCNJ11/SRCIN1/FOXP3/DERL3/INHBB/FAM3D/TNFRSF4/ZC3H12A/ADRA2A	GO_BP
134	GO:0001818~negative regulation of cytokine production	65	65/2709	289/18012	0.000453124	0.00818775	1.49544	ENSG00000062038/ENSG00000048052/ENSG00000115590/ENSG00000101695/ENSG00000150593/ENSG00000156642/ENSG00000136044/ENSG00000100784/ENSG00000154188/ENSG00000136826/ENSG00000082196/ENSG00000096384/ENSG00000010671/ENSG00000165795/ENSG00000204713/ENSG00000171522/ENSG00000072694/ENSG00000164251/ENSG00000205213/ENSG00000186188/ENSG00000171916/ENSG00000153064/ENSG00000107738/ENSG00000070961/ENSG00000132718…	CDH3/HDAC9/IL1R2/RNF125/PDCD4/NPTN/APPL2/RPS6KA5/ANGPT1/KLF4/C1QTNF3/HSP90AB1/BTK/NDRG2/TRIM27/PTGER4/FCGR2B/F2RL1/LGR4/FFAR4/LGALS9C/BANK1/VSIR/ATP2B1/SYT11/C5orf30/NCKAP1L/LGALS9B/INHBA/ARRB1/SSC5D/CD96/TRAIP/VSIG4/PRNP/CMKLR1/PTPRC/FGFR1/TLR6/AXL/LTF/GSTP1/LAPTM4B/IL23A/MC1R/LEF1/NLRP3/TLR8/PTPRS/CEACAM1/CD33/HMOX1/ARG2/SRGN/SLAMF1/KLF2/GPNMB/SLC11A1/IRAK3/FOXP3/CD84/INHBB/INPP5D/TNFRSF4/ZC3H1…	GO_BP
135	GO:0034599~cellular response to oxidative stress	65	65/2709	289/18012	0.000453124	0.00818775	1.49544	ENSG00000135218/ENSG00000171791/ENSG00000141570/ENSG00000170962/ENSG00000163516/ENSG00000183010/ENSG00000162409/ENSG00000140416/ENSG00000188906/ENSG00000174099/ENSG00000117592/ENSG00000137449/ENSG00000211445/ENSG00000158828/ENSG00000136826/ENSG00000109819/ENSG00000010671/ENSG00000155846/ENSG00000164938/ENSG00000105976/ENSG00000106462/ENSG00000126602/ENSG00000015413/ENSG00000064545/ENSG00000137672…	CD36/BCL2/CBX8/PDGFD/ANKZF1/PYCR1/PRKAA2/TPM1/LRRK2/MSRB3/PRDX6/CPEB2/GPX3/PINK1/KLF4/PPARGC1A/BTK/PPARGC1B/TP53INP1/MET/EZH2/TRAP1/DPEP1/TMEM161A/TRPC6/AGAP3/PRKN/PYROXD1/SIGMAR1/TRAF2/GSKIP/DAPK1/PDGFRA/AIF1/ECT2/FOXO1/MELK/TLR6/AXL/SLC25A24/FER/NR4A3/CYP1B1/GSTP1/FBLN5/NCF1/GUCY1B3/SLC7A11/GPR37L1/GPX2/HMOX1/HSPA1B/CDK1/SMPD3/KLF2/LCN2/FABP1/AQP1/CYBB/MMP3/DHRS2/NQO1/TRPM2/NOX4/ZC3H12A	GO_BP
136	GO:0051701~interaction with host	50	50/2709	209/18012	0.000455585	0.00820843	1.59066	ENSG00000149294/ENSG00000105974/ENSG00000163347/ENSG00000148180/ENSG00000166825/ENSG00000101558/ENSG00000119541/ENSG00000185885/ENSG00000090659/ENSG00000204713/ENSG00000105976/ENSG00000197375/ENSG00000105281/ENSG00000164116/ENSG00000185803/ENSG00000171552/ENSG00000073008/ENSG00000259207/ENSG00000185345/ENSG00000213186/ENSG00000260314/ENSG00000182481/ENSG00000142089/ENSG00000073060/ENSG00000105971…	NCAM1/CAV1/CLDN1/GSN/ANPEP/VAPA/VPS4B/IFITM1/CD209/TRIM27/MET/SLC22A5/SLC1A5/GUCY1A3/SLC52A2/BCL2L1/PVR/ITGB3/PRKN/TRIM59/MRC1/KPNA2/IFITM3/SCARB1/CAV2/TRIM28/FCN1/AXL/CLEC5A/IFIT1/SCRIB/ITGB7/ITGA2/CHMP4C/HSPA1B/TMPRSS2/CDK1/SLAMF1/CLDN9/NECTIN4/CD4/MID2/HYAL3/CD86/CXCL8/IFITM2/HAVCR1/TNFRSF4/ZC3H12A/TYRO3	GO_BP
137	GO:0086003~cardiac muscle cell contraction	21	21/2709	66/18012	0.000459962	0.00823967	2.11557	ENSG00000145362/ENSG00000198523/ENSG00000113448/ENSG00000177098/ENSG00000153956/ENSG00000105974/ENSG00000049759/ENSG00000152642/ENSG00000165995/ENSG00000145349/ENSG00000134755/ENSG00000075142/ENSG00000182963/ENSG00000196924/ENSG00000170624/ENSG00000157388/ENSG00000171385/ENSG00000105711/ENSG00000159167/ENSG00000151067/ENSG00000196296	ANK2/PLN/PDE4D/SCN4B/CACNA2D1/CAV1/NEDD4L/GPD1L/CACNB2/CAMK2D/DSC2/SRI/GJC1/FLNA/SGCD/CACNA1D/KCND3/SCN1B/STC1/CACNA1C/ATP2A1	GO_BP
138	GO:1902903~regulation of supramolecular fiber organization	75	75/2709	344/18012	0.000466548	0.0083337	1.44963	ENSG00000104332/ENSG00000165410/ENSG00000198121/ENSG00000104435/ENSG00000107562/ENSG00000163431/ENSG00000172403/ENSG00000109846/ENSG00000105270/ENSG00000140416/ENSG00000081189/ENSG00000166780/ENSG00000173898/ENSG00000145147/ENSG00000148180/ENSG00000144824/ENSG00000109265/ENSG00000133627/ENSG00000204713/ENSG00000088756/ENSG00000137077/ENSG00000105976/ENSG00000106683/ENSG00000120885/ENSG00000171522…	SFRP1/CFL2/LPAR1/STMN2/CXCL12/LMOD1/SYNPO2/CRYAB/CLIP3/TPM1/MEF2C/C16orf45/SPTBN2/SLIT2/GSN/PHLDB2/KIAA1211/ACTR3B/TRIM27/ARHGAP28/CCL21/MET/LIMK1/CLU/PTGER4/ASAP3/TMOD2/MAP1A/F2RL1/LIMA1/SCIN/FGF13/WASL/MAP1B/PRKN/NCKAP1L/CCR7/S1PR1/CKAP2/FLNA/IQGAP2/C15orf62/EPHA1/APC/PSRC1/SYNPO/ARHGAP6/CDC42EP3/PTK2B/DSTN/DLC1/GMFB/SPTBN5/FER/GMFG/HCLS1/HDGFL3/PLEKHH2/RDX/MYADM/WAS/AKAP9/HSPA1B/PROX1/VILL/TRP…	GO_BP
139	GO:0070252~actin-mediated cell contraction	31	31/2709	113/18012	0.000478649	0.00842909	1.82405	ENSG00000145362/ENSG00000198523/ENSG00000113448/ENSG00000177098/ENSG00000153956/ENSG00000105974/ENSG00000140416/ENSG00000198947/ENSG00000049759/ENSG00000152642/ENSG00000197702/ENSG00000165995/ENSG00000145349/ENSG00000134755/ENSG00000198467/ENSG00000092841/ENSG00000075142/ENSG00000175084/ENSG00000182963/ENSG00000196924/ENSG00000170624/ENSG00000157388/ENSG00000171385/ENSG00000139926/ENSG00000105711…	ANK2/PLN/PDE4D/SCN4B/CACNA2D1/CAV1/TPM1/DMD/NEDD4L/GPD1L/PARVA/CACNB2/CAMK2D/DSC2/TPM2/MYL6/SRI/DES/GJC1/FLNA/SGCD/CACNA1D/KCND3/FRMD6/SCN1B/PDPN/STC1/CACNA1C/NEB/VIM/ATP2A1	GO_BP
140	GO:0070482~response to oxygen levels	83	83/2709	389/18012	0.000492436	0.00864745	1.41867	ENSG00000104332/ENSG00000105894/ENSG00000141052/ENSG00000145936/ENSG00000198121/ENSG00000160307/ENSG00000107562/ENSG00000156113/ENSG00000181856/ENSG00000164442/ENSG00000171791/ENSG00000105974/ENSG00000183023/ENSG00000129474/ENSG00000109846/ENSG00000026103/ENSG00000181061/ENSG00000112715/ENSG00000150995/ENSG00000124440/ENSG00000137449/ENSG00000135245/ENSG00000136997/ENSG00000158828/ENSG00000125845…	SFRP1/PTN/MYOCD/KCNMB1/LPAR1/S100B/CXCL12/KCNMA1/SLC2A4/CITED2/BCL2/CAV1/SLC8A1/AJUBA/CRYAB/FAS/HIGD1A/VEGFA/ITPR1/HIF3A/CPEB2/HILPDA/MYC/PINK1/BMP2/PLEKHN1/PPARGC1A/TEK/AHCY/FAM162A/E2F1/OXTR/ASCL2/IRAK1/NDNF/ARNT2/TRPC6/TGFBR3/CPEB4/PTGIS/MB/PSMA7/CDK4/CLCA1/ACVRL1/ACAA2/PCK1/CBFA2T3/CAPN2/PTK2B/PLAU/COL1A1/SUV39H1/FOXO1/DNMT3B/STC2/RORA/DDIT4/TH/LOXL2/CCNB1/HSD11B2/ITGA2/PMAIP1/ANG/SLC2A1/ANGP…	GO_BP
141	GO:0051445~regulation of meiotic cell cycle	17	17/2709	49/18012	0.000513015	0.00885911	2.30678	ENSG00000101224/ENSG00000071539/ENSG00000172572/ENSG00000142875/ENSG00000128342/ENSG00000158402/ENSG00000181085/ENSG00000117399/ENSG00000112742/ENSG00000163132/ENSG00000181773/ENSG00000120129/ENSG00000164045/ENSG00000106003/ENSG00000066279/ENSG00000114251/ENSG00000120149	CDC25B/TRIP13/PDE3A/PRKACB/LIF/CDC25C/MAPK15/CDC20/TTK/MSX1/GPR3/DUSP1/CDC25A/LFNG/ASPM/WNT5A/MSX2	GO_BP
142	GO:2001238~positive regulation of extrinsic apoptotic signaling pathway	17	17/2709	49/18012	0.000513015	0.00885911	2.30678	ENSG00000104332/ENSG00000101955/ENSG00000105974/ENSG00000164850/ENSG00000239697/ENSG00000006327/ENSG00000142867/ENSG00000165731/ENSG00000127191/ENSG00000122641/ENSG00000135916/ENSG00000121858/ENSG00000081237/ENSG00000135744/ENSG00000125826/ENSG00000141682/ENSG00000162772	SFRP1/SRPX/CAV1/GPER1/TNFSF12/TNFRSF12A/BCL10/RET/TRAF2/INHBA/ITM2C/TNFSF10/PTPRC/AGT/RBCK1/PMAIP1/ATF3	GO_BP
143	GO:0023061~signal release	96	96/2709	463/18012	0.000528531	0.00907676	1.37862	ENSG00000104332/ENSG00000075073/ENSG00000166501/ENSG00000173175/ENSG00000169860/ENSG00000100604/ENSG00000116473/ENSG00000220205/ENSG00000173267/ENSG00000164850/ENSG00000124766/ENSG00000188906/ENSG00000081189/ENSG00000150995/ENSG00000053438/ENSG00000124205/ENSG00000146469/ENSG00000156299/ENSG00000102003/ENSG00000151729/ENSG00000138744/ENSG00000148660/ENSG00000184349/ENSG00000082196/ENSG00000108405…	SFRP1/TACR2/PRKCB/ADCY5/P2RY1/CHGA/RAP1A/VAMP2/SNCG/GPER1/SOX4/LRRK2/MEF2C/ITPR1/NNAT/EDN3/VIP/TIAM1/SYP/SLC25A4/NAAA/CAMK2G/EFNA5/C1QTNF3/P2RX1/CAPN10/BTK/RIMS3/CACNB2/BMP6/APLN/PDX1/NOV/FZD4/FFAR4/ICA1/APBA1/PASK/PRKN/SYT11/TFR2/SRI/MYO5A/GIT1/INHBA/ARRB1/SNPH/WLS/HNF1A/FGFR1/FKBP1B/SYT7/VSNL1/P2RX7/NCS1/OXCT1/CHD7/CACNA1D/AGT/PTPRN/IL11/LIF/NR1D1/STX11/SCRIB/ASIC1/NRXN2/STX1A/LTBP4/C1QTNF12/NM…	GO_BP
144	GO:0001505~regulation of neurotransmitter levels	76	76/2709	351/18012	0.000531772	0.00910732	1.43966	ENSG00000046653/ENSG00000075073/ENSG00000166501/ENSG00000135218/ENSG00000169860/ENSG00000116473/ENSG00000220205/ENSG00000173267/ENSG00000105974/ENSG00000116741/ENSG00000164850/ENSG00000069535/ENSG00000188641/ENSG00000188906/ENSG00000081189/ENSG00000058668/ENSG00000102003/ENSG00000138744/ENSG00000169213/ENSG00000136826/ENSG00000108405/ENSG00000182199/ENSG00000096384/ENSG00000117016/ENSG00000165995…	GPM6B/TACR2/PRKCB/CD36/P2RY1/RAP1A/VAMP2/SNCG/CAV1/RGS2/GPER1/MAOB/DPYD/LRRK2/MEF2C/ATP2B4/SYP/NAAA/RAB3B/KLF4/P2RX1/SHMT2/HSP90AB1/RIMS3/CACNB2/CLU/HBB/PTGIS/MAOA/SLC7A2/ITGB3/APBA1/PRKN/SYT11/GIT1/SRD5A1/SNPH/AIF1/PTK2B/SYT7/P2RX7/NCS1/CACNA1D/AGT/SLC29A2/RORA/TLR6/TH/PDE1B/GLA/CYP1B1/COMT/STX11/SCRIB/ASIC1/SLC22A3/NRXN2/STX1A/SLC7A11/RAB3A/SLC1A1/GAD1/PAH/ARG2/ACHE/KLF2/SLC44A4/SYT1/MCTP1/GABR…	GO_BP
145	GO:0002440~production of molecular mediator of immune response	48	48/2709	200/18012	0.000542396	0.00923852	1.59575	ENSG00000078596/ENSG00000135218/ENSG00000127951/ENSG00000100604/ENSG00000012124/ENSG00000133710/ENSG00000164342/ENSG00000154188/ENSG00000010671/ENSG00000122678/ENSG00000157404/ENSG00000121807/ENSG00000028277/ENSG00000072694/ENSG00000164251/ENSG00000142867/ENSG00000170476/ENSG00000071564/ENSG00000144381/ENSG00000127191/ENSG00000127957/ENSG00000153283/ENSG00000134321/ENSG00000174371/ENSG00000081237…	ITM2A/CD36/FGL2/CHGA/CD22/SPINK5/TLR3/ANGPT1/BTK/POLM/KIT/CCR2/POU2F2/FCGR2B/F2RL1/BCL10/MZB1/TCF3/HSPD1/TRAF2/PMS2P3/CD96/RSAD2/EXO1/PTPRC/TNFSF13/LAX1/NR4A3/GCNT3/PRKDC/POLQ/CD28/B2M/NLRP3/MAD2L2/SASH3/TNFSF13B/HMOX1/NOD2/IL1R1/MIF/SLC11A1/SPON2/IRAK3/FOXP3/TNFRSF4/C20orf196/WNT5A	GO_BP
146	GO:0035306~positive regulation of dephosphorylation	19	19/2709	58/18012	0.000562734	0.00943034	2.1781	ENSG00000198668/ENSG00000081189/ENSG00000101445/ENSG00000187391/ENSG00000196950/ENSG00000104643/ENSG00000158828/ENSG00000125845/ENSG00000166311/ENSG00000096384/ENSG00000155846/ENSG00000166869/ENSG00000058272/ENSG00000165802/ENSG00000081237/ENSG00000164741/ENSG00000164171/ENSG00000105383/ENSG00000115956	CALM1/MEF2C/PPP1R16B/MAGI2/SLC39A10/MTMR9/PINK1/BMP2/SMPD1/HSP90AB1/PPARGC1B/CHP2/PPP1R12A/NSMF/PTPRC/DLC1/ITGA2/CD33/PLEK	GO_BP
147	GO:0010464~regulation of mesenchymal cell proliferation	13	13/2709	33/18012	0.000579102	0.00958959	2.61928	ENSG00000105894/ENSG00000125398/ENSG00000128573/ENSG00000066468/ENSG00000112715/ENSG00000148516/ENSG00000105989/ENSG00000136997/ENSG00000103241/ENSG00000077782/ENSG00000164690/ENSG00000125378/ENSG00000114251	PTN/SOX9/FOXP2/FGFR2/VEGFA/ZEB1/WNT2/MYC/FOXF1/FGFR1/SHH/BMP4/WNT5A	GO_BP
[truncated: 1,191 more rows]

## Sheet: STAD
	Terms	Counts	GeneRatio	BgRatio	pValue	FDR	foldEnrichment	geneID	geneSymbol	Category
[truncated: 1,318 more rows]

## Sheet: HNSC
	Terms	Counts	GeneRatio	BgRatio	pValue	FDR	foldEnrichment	geneID	geneSymbol	Category
[truncated: 1,302 more rows]

## Sheet: LIHC
	Terms	Counts	GeneRatio	BgRatio	pValue	FDR	foldEnrichment	geneID	geneSymbol	Category
[truncated: 1,411 more rows]

## Sheet: ESCA
	Terms	Counts	GeneRatio	BgRatio	pValue	FDR	foldEnrichment	geneID	geneSymbol	Category
[truncated: 1,199 more rows]
